# Supplementary material for: Genes associated with ant social behavior show distinct transcriptional and evolutionary patterns
Source: eLife journal article supplement (doi:10.7554/elife.04775), 2015-01-26

Complete analysis for Mikhayev and Linksvayer, Genes associated with ant social behavior show distinct transcriptional and evolutionary patterns

=====

```
library(ggplot2)
library(RMySQL)
library(edgeR)
library(DESeq2)
library(GOstats)
library(GSEABase)
library(gplots)
library(gmodels)
library(gtools)
library(pgirmess)
library(class)
library(gridExtra)
library(reshape)
library(WGCNA)
```

```
## =====
## *
## *  Package WGCNA 1.41.1 loaded.
## *
## *  Important note: It appears that your system supports multi-threading,
## *  but it is not enabled within WGCNA in R.
## *  To allow multi-threading within WGCNA with all available cores, use
## *
## *      allowWGCNAThreads()
## *
## *  within R. Use disableWGCNAThreads() to disable threading if necessary.
## *  Alternatively, set the following environment variable on your system:
## *
## *      ALLOW_WGCNA_THREADS=<number_of_processors>
## *
## *  for example
## *
## *      ALLOW_WGCNA_THREADS=8
## *
## *  To set the environment variable in linux bash shell, type
## *
## *      export ALLOW_WGCNA_THREADS=8
## *
## *  before running R. Other operating systems or shells will
## *  have a similar command to achieve the same aim.
## *
## =====
```

```
allowWGCNAThreads()
```

```
## Allowing multi-threading with up to 8 threads.
```

```
library(boot)
library(multcomp)
library(data.table)
library(doMC)
registerDoMC(6)
```

Read gene expression data from SQL database and filter any gene with more than half of the libraries with FPKM<1.

```
if (exists("mydb")) dbDisconnect(mydb)
#mydb = dbConnect(MySQL(), dbname='monomorium', host='ECOEVO.UNIT.OIST.JP')
mydb = dbConnect(MySQL(), user = "root", dbname = "monomorium1", host = "localhost")
contrasts <- dbGetQuery(mydb, "SELECT * FROM contrasts") # read a priori contrasts
# this makes the contrasts matrix compatible with design matrix, which is sorted by level
contrasts <- contrasts[, sort(names(contrasts))]
factors <- dbGetQuery(mydb, "SELECT * FROM factors") #read treatments

#Note: MP12 (age15), MP14 (age18), MP19 (prot) have relatively low mapping rates (<70%)

counts <- dbGetQuery(mydb, "SELECT gene_id, MP1, MP2, MP3, MP4, MP5, MP6, MP7, MP8, MP9, MP10, MP11, MP12, MP13,
  MP14, MP15, MP16, MP17, MP18, MP19, MP20, MP21, MP22, MP23, MP24 FROM expected_counts_genes")
row.names(counts) <- counts$gene_id # change first column to row names
counts <- subset(counts, select=-c(gene_id))
fpkm <- dbGetQuery(mydb, "SELECT gene_id, MP1, MP2, MP3, MP4, MP5, MP6, MP7, MP8, MP9, MP10, MP11, MP12, MP13,
  MP14, MP15, MP16, MP17, MP18, MP19, MP20, MP21, MP22, MP23, MP24 FROM fpkm_genes")
row.names(fpkm) <- rownames(counts)
fpkm <- subset(fpkm, select=-c(gene_id))

#select isoforms where at least half of the libraries have FPKM >1
keep=rowSums(fpkm>= 1)>= ncol(counts)/2
#create design matrix, and label rows and columns according to our contrasts
design <- model.matrix(~0+factors$factor, data=counts)
rownames(design) <- colnames(counts)
colnames(design) <- names(contrasts)
```

## Visualize cutoff distribution

```
ggplot(melt(fpkm), aes(x=value, color=variable))+geom_density()+
  scale_x_log10()+theme_bw()+geom_vline(xintercept=1, color="red")+
  xlab('expected counts')+ylab('density')+ theme(legend.position="none")
```

```
## Using as id variables
```

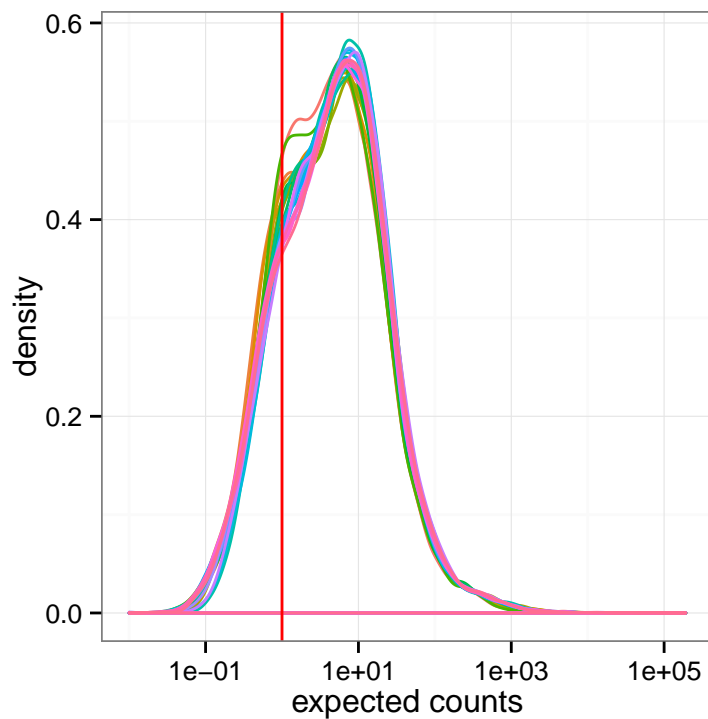

Conduct differential gene expression analysis

```
dge <- DGEList(counts=round(counts[keep,]),group=factors$factor)    #apply filtering!
dge <- calcNormFactors(dge)
dge <- estimateGLMCommonDisp(dge,design,verbose=TRUE)
```

```
## Disp = 0.02959 , BCV = 0.172
```

```
dge <- estimateGLMTrendedDisp(dge, design)
dge <- estimateGLMTagwiseDisp(dge, design)
fit <- glmFit(dge,design)
lrt <- glmLRT(fit)
```

plot NMDS as a sanity check

```
mdsplot <- plotMDS(dge,top=500)
```

```
plot(mdsplot, main="",xlab="Dimension 1",ylab="Dimension 2")
text(mdsplot$cmdscale.out[,1],mdsplot$cmdscale.out[,2],factors$factor)
```

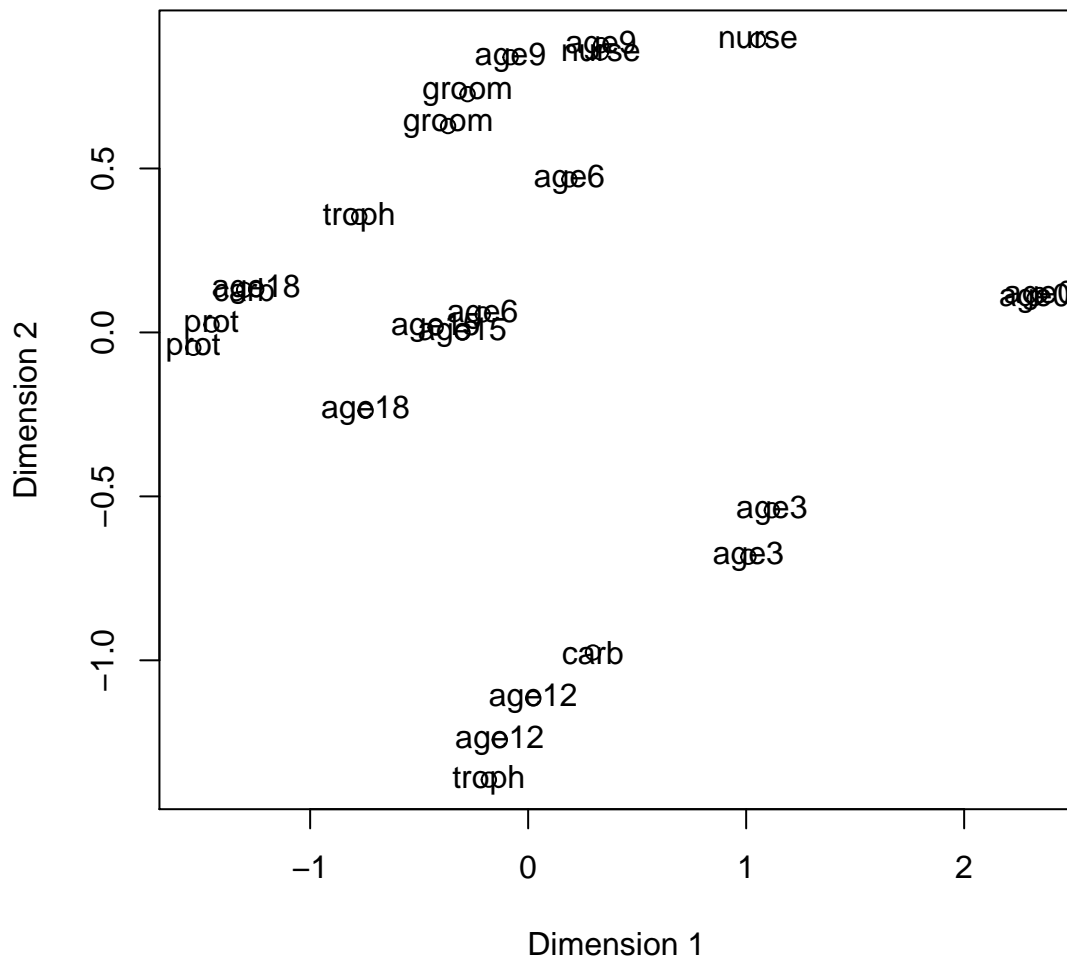

The ages and tasks cluster together, suggesting that the transcriptional data capture some sort of biological signal.

Examine task-specific gene expression, and determine which behaviors we should focus on

```
#logFC is computed as X - Y, so positive values are upregulated in focal contrast
et_forager <- glmLRT(fit, contrast=makeContrasts((carb+prot)/2 - (nurse+groom+troph)/3,
  levels=design))

par(mfrow=c(2,2))
summary(de_forager <- decideTestsDGE(et_forager, p=0.05, adjust="BH"))
```

```
##      [,1]
## -1    403
##  0   16380
##  1     588
```

```

plotSmear(et_forager, de.tags=rownames(fit)[as.logical(de_forager)])
title("foragers vs. others")
et_nurse <- glmLRT(fit, contrast=makeContrasts(nurse - (carb+prot+groom+troph)/4, levels=design))
summary(de_nurse <- decideTestsDGE(et_nurse, p=0.05, adjust="BH"))

```

```

##      [,1]
## -1    898
##  0  15444
##  1   1029

```

```

plotSmear(et_nurse, de.tags=rownames(fit)[as.logical(de_nurse)])
title("nurses vs. others")
et_groom <- glmLRT(fit, contrast=makeContrasts(groom - (carb+prot+nurse+troph)/4, levels=design))
summary(de_groom <- decideTestsDGE(et_groom, p=0.05, adjust="BH"))

```

```

##      [,1]
## -1      2
##  0  17343
##  1     26

```

```

plotSmear(et_groom, de.tags=rownames(fit)[as.logical(de_groom)])
title("grooming vs. others")
et_troph <- glmLRT(fit, contrast=makeContrasts(troph - (carb+prot+nurse+groom)/4, levels=design))
summary(de_troph <- decideTestsDGE(et_troph, p=0.05, adjust="BH"))

```

```

##      [,1]
## -1     25
##  0  17323
##  1     23

```

```

plotSmear(et_troph, de.tags=rownames(fit)[as.logical(de_troph)])
title("trophallaxis vs. others")

```

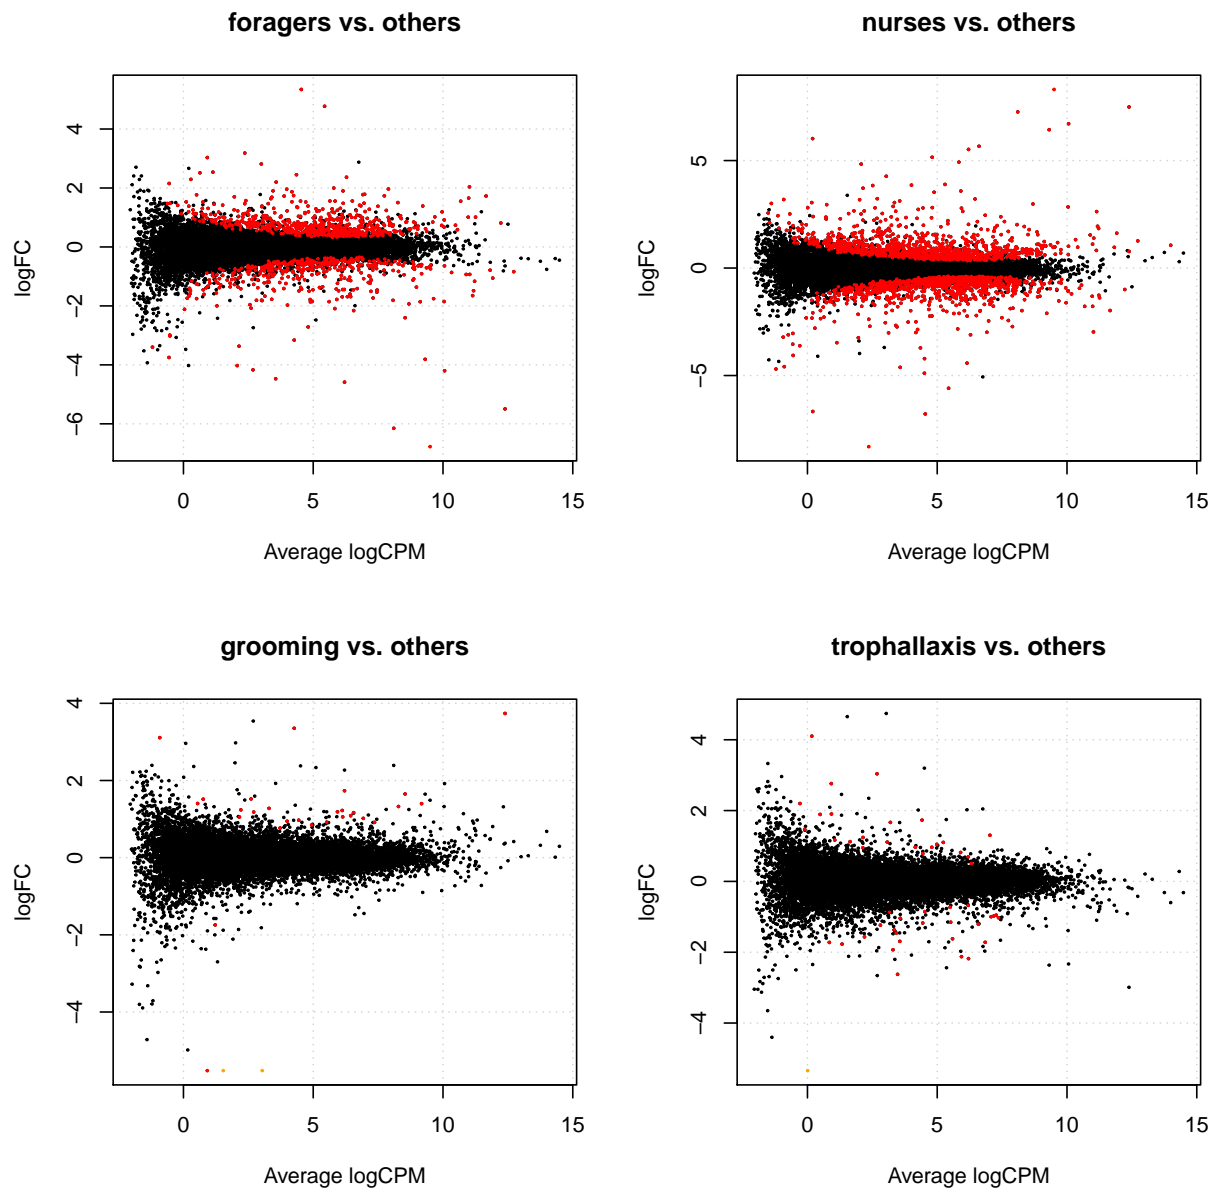

```
par(mfrow=c(1,1))

et_nurse_forager <- glmLRT(fit, contrast=makeContrasts(nurse - (carb + prot)/2, levels=design))
summary(de_nurse_forager <- decideTestsDGE(et_nurse_forager, p=0.05, adjust="BH"))
```

```
##      [,1]
## -1  1217
##  0  14907
##  1   1247
```

Nurses and foragers are the two most distinct behavioral categories, and we'll focus our analysis on the from now on.

## Comparison with fire ants

Test to see if evolutionary rates differ between forager-upregulated and nurse-upregulated genes.

```
dnds <- dbGetQuery(mydb,"SELECT * FROM dNdS") # read evolutionary rates vs S. invicta
nurse_names <- rownames(et_nurse_forager$table[de_nurse_forager == 1,])
forager_names <- rownames(et_nurse_forager$table[de_nurse_forager == -1,])
nde_names <- rownames(et_nurse_forager$table[de_nurse_forager == 0 ,])
rates <- data.frame(rate = c(dnds[na.omit(match(nurse_names,dnds$gene)),2],
  dnds[na.omit(match(forager_names,dnds$gene)),2],
  dnds[na.omit(match(nde_names,dnds$gene)),2]),
  task = c(rep("nurse",length(na.omit(match(nurse_names,dnds$gene)))),
    rep("forager",length(na.omit(match(forager_names,dnds$gene)))),
    rep("NDE",length(na.omit(match(nde_names,dnds$gene)))))
rates$task <- factor(rates$task, levels=c("NDE", "nurse", "forager"))
ggplot(data=rates, aes(x=factor(task),y=rate))+geom_boxplot(notch=TRUE)+scale_y_log10()+theme_bw()
```

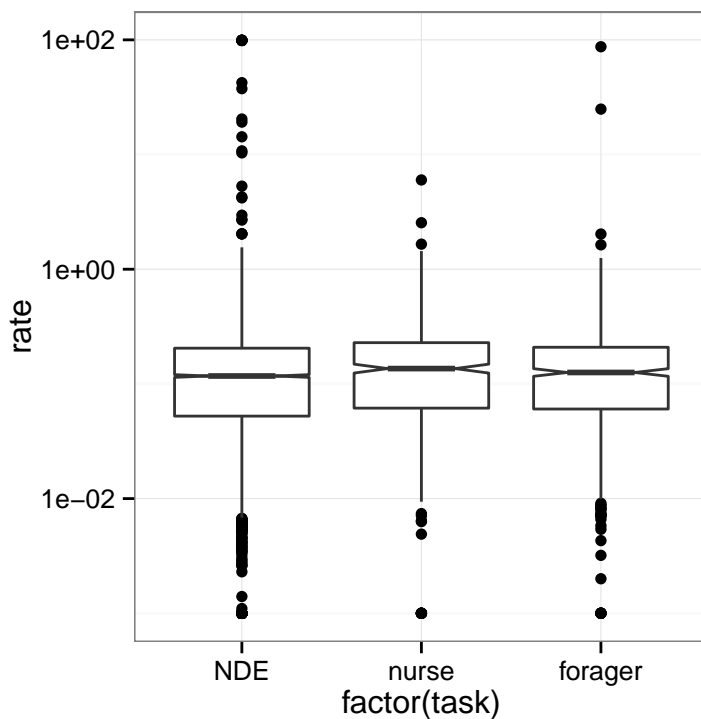

```
kruskal.test(rate ~ task, data = rates)
```

```
##
## Kruskal-Wallis rank sum test
##
## data: rate by task
## Kruskal-Wallis chi-squared = 10.48, df = 2, p-value = 0.005297
```

```
kruskalmc(rate ~ task, data = rates)
```

```
## Multiple comparison test after Kruskal-Wallis
```

```
## p.value: 0.05
## Comparisons
##           obs.dif critical.dif difference
## NDE-nurse      283.9       235.4       TRUE
## NDE-forager     153.7       215.6      FALSE
## nurse-forager   130.2       305.4      FALSE
```

```
#excluding
kruskal.test(rate ~ task, data = rates[rates$task != "NDE",])
```

```
##
## Kruskal-Wallis rank sum test
##
## data: rate by task
## Kruskal-Wallis chi-squared = 1.087, df = 1, p-value = 0.297
```

Looking at the data this way, it looks like nurse genes evolve significantly faster than NDE genes.

Are more highly expressed genes evolving slower?

```
cor.test(rowMeans(fpkms[dnds$gene,]), dnds$rate, method="spearman")
```

```
##
## Spearman's rank correlation rho
##
## data: rowMeans(fpkms[dnds$gene, ]) and dnds$rate
## S = 1.058e+11, p-value < 2.2e-16
## alternative hypothesis: true rho is not equal to 0
## sample estimates:
##      rho
## -0.1174
```

```
ggplot(data.frame(fpkms=rowMeans(fpkms[dnds$gene,]), rate=dnds$rate), aes(fpkms, rate))+
  geom_point(alpha=0.2)+scale_x_log10()+scale_y_log10()+theme_bw()
```

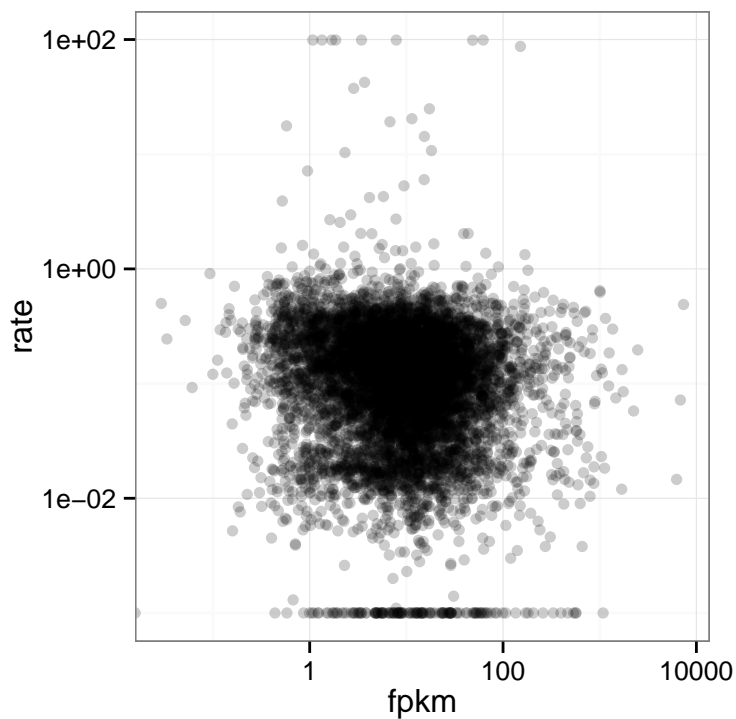

Yes, it looks like more highly expressed genes are indeed evolving slower.

Are forager genes or nurse, genes more highly expressed?

- *caveat*: more power to detect differential expression in highly expressed genes

```
fpkm_task <- data.frame(fpkm = rowMeans(fpkm[rownames(lrt$table),]), task = de_nurse_forager )
fpkm_task[forager_names,"task"] <- "forager"
fpkm_task[nurse_names,"task"] <- "nurse"
fpkm_task[fpkm_task[, "task"] == 0, "task"] <- "nde"
kruskalmc(fpkm ~ task, fpkm_task)
```

```
## Multiple comparison test after Kruskal-Wallis
## p.value: 0.05
## Comparisons
##      obs.dif critical.dif difference
## forager-nde    2742.2      357.9      TRUE
## forager-nurse   745.7      483.7      TRUE
## nde-nurse      1996.5      353.9      TRUE
```

```
ggplot(fpkm_task, aes(x=factor(task), y=log(fpkm)))+geom_boxplot()+theme_bw()+
  xlab("")+ylab("log fragments per kilobase mapped (FPKM)")
```

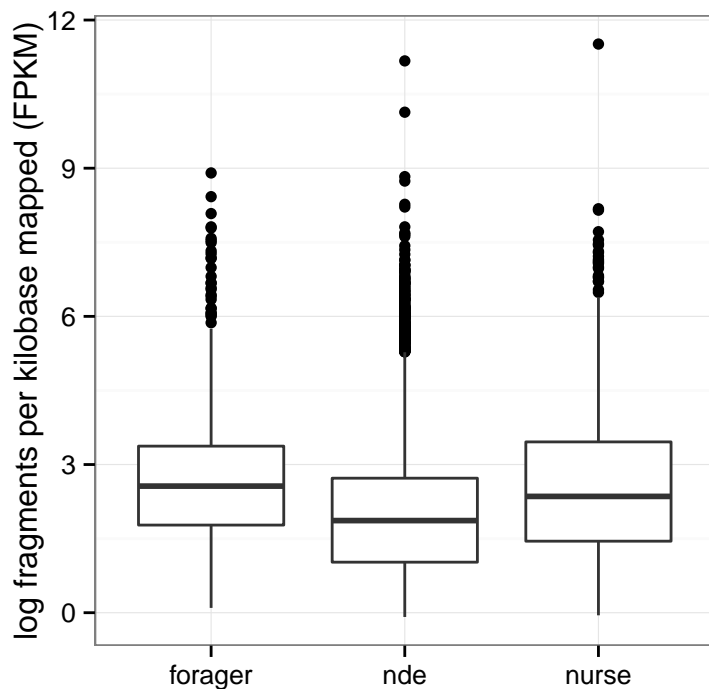

Comparing results with fire ant foraging study by Manfredini et al 2013

```
manfredini <- dbGetQuery(mydb, '
SELECT DISTINCT mp_id, microarray.gene_id, expression,rate FROM `mp vs sinv`
JOIN dNdS
ON `mp vs sinv`.mp_id = dNdS.gene_id
LEFT JOIN (SELECT DISTINCT gene_id, IF (logFC>0,"forager","nest") AS expression FROM
manfredini_expression
JOIN manfredini_names
ON manfredini_expression.manfredini_id = manfredini_names.manfredini_id) AS microarray
ON sinv_id = microarray.gene_id
GROUP BY mp_id
') #a few probes target the same gene, so just choose one of them
rownames(manfredini) <- manfredini$mp_id
fisher.test(matrix(c(
  nrow(subset(manfredini, expression=="forager")), # number of sinv forager genes with mp homologs
  nrow(manfredini[is.na(manfredini$expression),]),
  table(forager_names %in% subset(manfredini,expression=="forager")$mp_id["TRUE"],
  table(forager_names %in% subset(manfredini,expression=="forager")$mp_id["FALSE"])),
  ncol=2,byrow=T),alternative="less")
```

```
##
## Fisher's Exact Test for Count Data
##
## data:
## p-value = 0.04031
## alternative hypothesis: true odds ratio is less than 1
## 95 percent confidence interval:
## 0.0000 0.9806
```

```
## sample estimates:
## odds ratio
##      0.7142

fisher.test(matrix(c(
  nrow(subset(manfredini, expression=="nest")), # number of sinu nest genes with mp homologs
  nrow(manfredini[!is.na(manfredini$expression),]),
  table(nurse_names %in% subset(manfredini,expression=="nest")$mp_id)["TRUE"],
  table(nurse_names %in% subset(manfredini,expression=="nest")$mp_id)["FALSE"]),ncol=2,byrow=T),
  alternative="less")

##
## Fisher's Exact Test for Count Data
##
## data:
## p-value = 1
## alternative hypothesis: true odds ratio is less than 1
## 95 percent confidence interval:
##      0.00 17.26
## sample estimates:
## odds ratio
##      12.7
```

There is a small, but significant overlap in the genes conserved in various contexts

Another way to look at this, is to look at the *direction* of genes, rather than their overall significance, or correlation between logFC

```
manfredini2 <- dbGetQuery(mydb, '
SELECT DISTINCT mp_id, microarray.id, expression, logFC FROM `mp vs sinv`
JOIN dNdS ON `mp vs sinv`.mp_id = dNdS.gene_id
JOIN (SELECT manfredini_probe2gene.probe, manfredini_probe2gene.gene AS id,
IF(AVG(manfredini_expt1.out)>AVG(manfredini_expt1.in),"forager","nurse") AS expression,
log(2,POW(2,manfredini_expt1.in)/POW(2,manfredini_expt1.out)) as logFC
FROM manfredini_expt1
JOIN manfredini_probe2gene
ON manfredini_expt1.probe = manfredini_probe2gene.probe GROUP BY id) AS microarray
ON sinv_id = microarray.id
')

rownames(manfredini2) <- manfredini2$mp_id
upreg <- et_nurse_forager$table
upreg$task <- "nurse"
upreg[upreg$logFC<0,"task"] <- "forager"
commonNames <- intersect(rownames(upreg),manfredini2$mp_id)
CrossTable(upreg[commonNames,"task"],manfredini2[commonNames,"expression"],fisher=T)
```

```
##
##
##      Cell Contents
## |-----|
## |                      N |
## | Chi-square contribution |
```

```
## |          N / Row Total |
## |          N / Col Total |
## |          N / Table Total |
## |-----|
##
##
## Total Observations in Table:  6324
##
##
##                                | manfredini2[commonNames, "expression"]
## upreg[commonNames, "task"] |   forager |      nurse | Row Total |
## -----|-----|-----|-----|
##                forager |      2137 |      1148 |      3285 |
##                |      14.758 |      22.015 |      |
##                |      0.651 |      0.349 |      0.519 |
##                |      0.564 |      0.452 |      |
##                |      0.338 |      0.182 |      |
## -----|-----|-----|-----|
##                nurse |      1649 |      1390 |      3039 |
##                |      15.953 |      23.797 |      |
##                |      0.543 |      0.457 |      0.481 |
##                |      0.436 |      0.548 |      |
##                |      0.261 |      0.220 |      |
## -----|-----|-----|-----|
##                Column Total |      3786 |      2538 |      6324 |
##                |      0.599 |      0.401 |      |
## -----|-----|-----|-----|
##
##
## Fisher's Exact Test for Count Data
## -----
## Sample estimate odds ratio:  1.569
##
## Alternative hypothesis: true odds ratio is not equal to 1
## p =  2.36e-18
## 95% confidence interval:  1.416 1.738
##
## Alternative hypothesis: true odds ratio is less than 1
## p =  1
## 95% confidence interval:  0 1.71
##
## Alternative hypothesis: true odds ratio is greater than 1
## p =  1.305e-18
## 95% confidence interval:  1.439 Inf
##
##
##
```

```
cor.test(upreg[commonNames, "logFC"],manfredini2[commonNames, "logFC"],method="spearman")
```

```
##
## Spearman's rank correlation rho
##
## data:  upreg[commonNames, "logFC"] and manfredini2[commonNames, "logFC"]
```

```
## S = 3.612e+10, p-value < 2.2e-16
## alternative hypothesis: true rho is not equal to 0
## sample estimates:
##      rho
## 0.1432
```

So, about 55.8% of the genes are expressed in concordant direction and the correlation in logFC between the two datasets is  $\rho=0.143$

## Comparing patterns of gene expression with honeybees

```
hbee <- dbGetQuery(mydb, '
SELECT `blast amel vs mp`.amel, `blast amel vs mp`.mp, `alaux dge`.task FROM
`blast amel vs mp` JOIN `blast mp vs amel`
ON `blast amel vs mp`.amel = `blast mp vs amel`.amel AND `blast amel vs mp`.mp =
`blast mp vs amel`.mp
LEFT JOIN `alaux dge`
ON `alaux dge`.gene = SUBSTR(`blast amel vs mp`.amel,1,7)')

# test to see whether there is an enrichment in mp forager genes that have bee homologs
fisher.test(matrix(c(
  nrow(subset(hbee, task=="forager")), # number of honeybee forager genes with mp homologs
  nrow(hbee[is.na(hbee$task),]),
  table(forager_names %in% subset(hbee, task=="forager")$mp) ["TRUE"],
  table(forager_names %in% subset(hbee, task=="forager")$mp) ["FALSE"]), ncol=2, byrow=T),
  alternative="less")
```

```
##
## Fisher's Exact Test for Count Data
##
## data:
## p-value = 0.9775
## alternative hypothesis: true odds ratio is less than 1
## 95 percent confidence interval:
##  0.000 1.794
## sample estimates:
## odds ratio
##      1.352
```

```
fisher.test(matrix(c(
  nrow(subset(hbee, task=="nurse")), # total hb nurse gene count
  nrow(hbee[is.na(hbee$task),]), # number of NDE
  table(nurse_names %in% subset(hbee, task=="nurse")$mp) ["TRUE"],
  # nurse genes matching mp nurse genes
  table(nurse_names %in% subset(hbee, task=="nurse")$mp) ["FALSE"]), ncol=2, byrow=T),
  alternative="less") # genes not matching mp nurse genes
```

```
##
## Fisher's Exact Test for Count Data
##
## data:
```

```
## p-value = 0.9997
## alternative hypothesis: true odds ratio is less than 1
## 95 percent confidence interval:
## 0.000 1.901
## sample estimates:
## odds ratio
## 1.517
```

By contrast with fire ants, there is no significant overlap with bees.

## Plot heatmap for foragers, nurse and ages

- This heatmap shows just the top genes, so that the patterns are easier to see by eye

```
polyethism <- grepl("age|nurse|forager",gsub("carb|prot","forager",factors$factor))
forager_nurse_et_names <- rownames(et_nurse_forager$table[de_nurse_forager !=0,])
#plot the 20 genes most differentiated between nurses and workers
strong_dge <- order(et_nurse_forager$table[forager_nurse_et_names,"PValue"],decreasing=FALSE)[0:200]
strong_names <- rownames(et_nurse_forager$table[forager_nurse_et_names,][strong_dge,])
col_order <- mixedorder(gsub("nurse","0",factors$factor[polyethism]))
colData <- data.frame(task = factors$factor[polyethism][col_order],
  lib = colnames(counts)[polyethism][col_order])
```

```
mycols <- colorpanel(n=19,low="white",high="darkgreen")
color_codes <- data.frame(factor = c("age0", "age3", "age6", "age9", "age12", "age15", "age18",
  "groom", "nurse", "troph", "prot", "carb"), color = c("#CCFFFF", "#66CCFF", "#3399FF",
  "#0066FF", "#0000FF", "#0000CC", "#000066", "#d53e4f", "#FFFF00", "#fee08b", "#660066", "#660066"))
colors <- as.vector(color_codes$color[match(factors$factor[polyethism][col_order],
  color_codes$factor)])
heatmap.2(log(1+as.matrix(counts[strong_names,polyethism][1:20,col_order])),key=FALSE,
  trace="none",col=mycols,labRow=FALSE,density.info="none",Colv=FALSE,
  ColSideColors=as.vector(colors),labCol=factors$factor[polyethism][col_order],
  hclustfun=function(c){hclust(c, method="ward")},margins = c(10, 2))
```

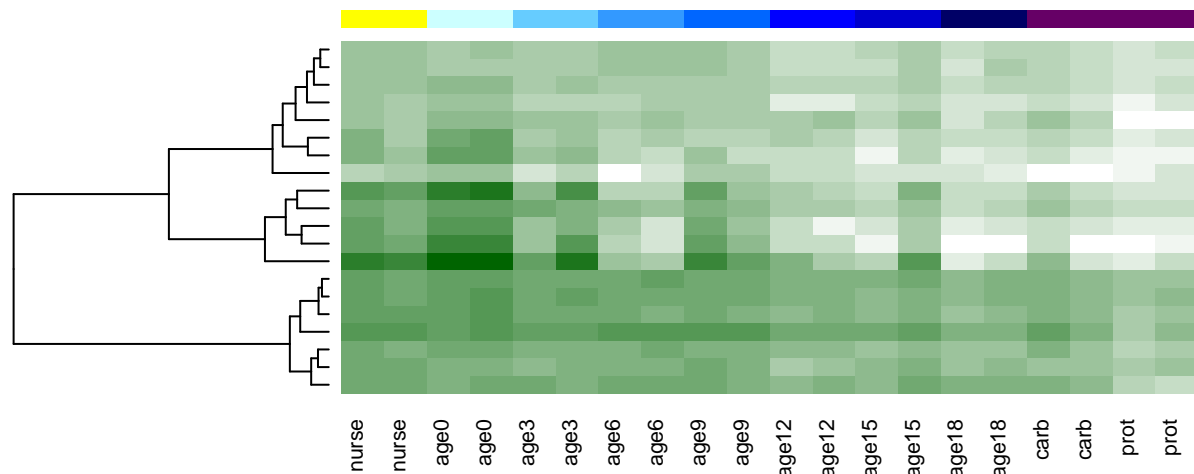

```
#plot the top 100 genes most differentiated, with an added dendrogram
#showing the relationships among all samples based on these 100 genes
heatmap.2(log(1+as.matrix(counts[strong_names,polyethism][1:100,col_order])),
key=FALSE,trace="none",col=mycols,labRow=FALSE,density.info="none",
ColSideColors=as.vector(colors),labCol=factors$factor[polyethism][col_order],
hclustfun=function(c){hclust(c, method="complete")},margins = c(10, 2))
```

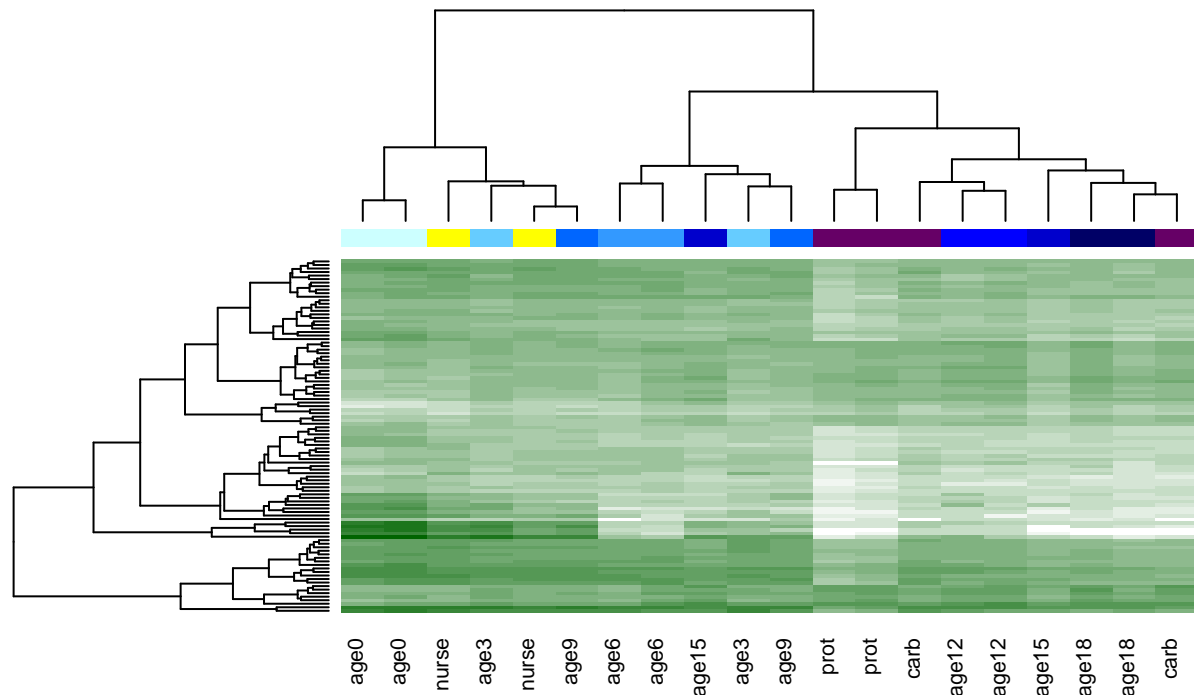

## K-NN

- supervised learning of task-specific genes.

```
forager_nurse <- grepl("nurse|carb|prot",factors$factor)
tasks <- ! grepl("age",factors$factor)
train <- as.data.frame(t(counts[forager_nurse_et_names,forager_nurse]))
test <- as.data.frame(t(counts[forager_nurse_et_names,! tasks]))
cl <- factor(gsub("carb|prot","forager",factors$factor[forager_nurse]))
model <- knn(train, test, cl, k = 3, prob=TRUE)
cbind(model,factors$factor[! tasks],attr(model,"prob"))[mixedorder(factors$factor[! tasks]),]
```

```
##      model
## [1,] "2"  "age0"  "0.666666666666667"
## [2,] "2"  "age0"  "0.666666666666667"
## [3,] "2"  "age3"  "0.666666666666667"
## [4,] "2"  "age3"  "0.666666666666667"
## [5,] "2"  "age6"  "0.666666666666667"
## [6,] "2"  "age6"  "0.666666666666667"
## [7,] "2"  "age9"  "0.666666666666667"
## [8,] "2"  "age9"  "0.666666666666667"
## [9,] "1"  "age12" "1"
## [10,] "1"  "age12" "1"
## [11,] "1"  "age15" "1"
```

```
## [12,] "1"    "age15" "0.6666666666666667"
## [13,] "1"    "age18" "1"
## [14,] "1"    "age18" "1"
```

*#visually see if the ages actually cluster together*

```
temp<-t(counts[forager_nurse_et_names,! tasks])
rownames(temp) <- factors[!tasks,"factor"]
plot(hclust((dist(temp))))
```

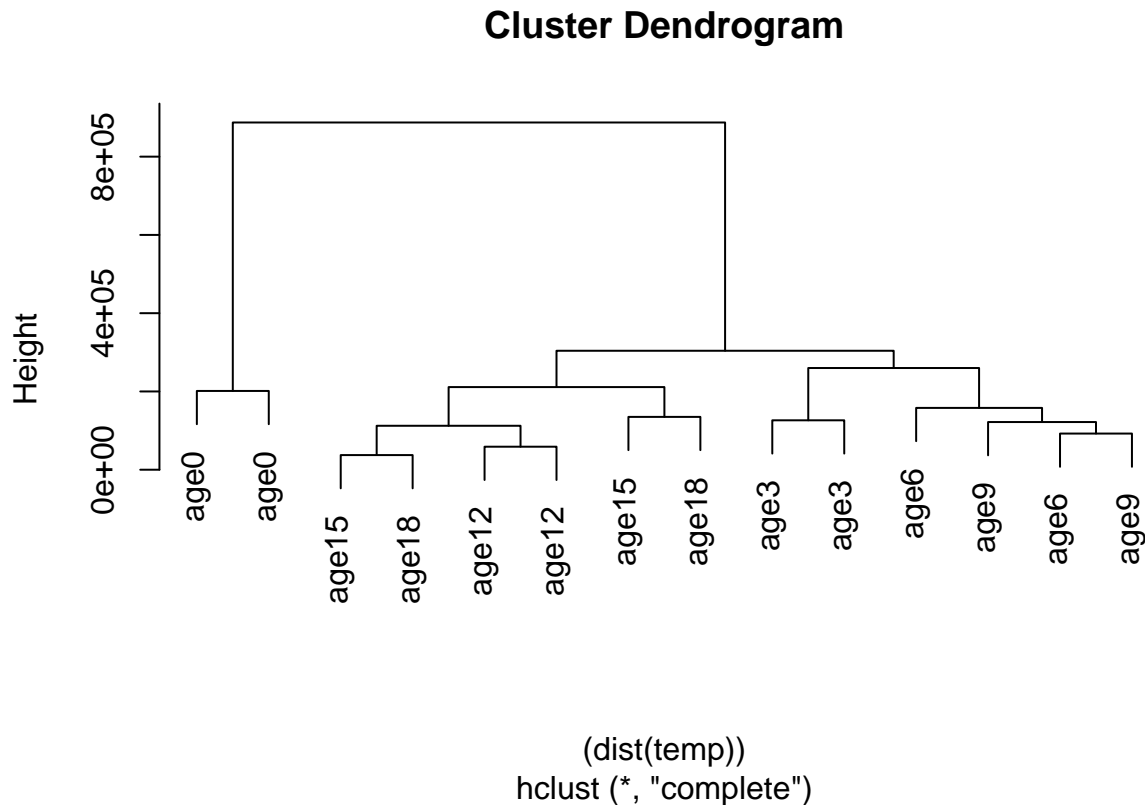

*#excluding age0*

```
model2 <- knn(train, test, cl, k = 3, prob=TRUE)
test2 <- as.data.frame(t(counts[forager_nurse_et_names,! tasks]))
model <- knn(train, test, cl, k = 3, prob=TRUE)
cbind(model2,factors$factor[! tasks],attr(model,"prob"))[mixedorder(factors$factor[! tasks]),]
```

```
##      model2
## [1,] "2"    "age0" "0.6666666666666667"
## [2,] "2"    "age0" "0.6666666666666667"
## [3,] "2"    "age3" "0.6666666666666667"
## [4,] "2"    "age3" "0.6666666666666667"
## [5,] "2"    "age6" "0.6666666666666667"
## [6,] "2"    "age6" "0.6666666666666667"
## [7,] "2"    "age9" "0.6666666666666667"
## [8,] "2"    "age9" "0.6666666666666667"
## [9,] "1"    "age12" "1"
```

```
## [10,] "1"      "age12" "1"
## [11,] "1"      "age15" "1"
## [12,] "1"      "age15" "0.6666666666666667"
## [13,] "1"      "age18" "1"
## [14,] "1"      "age18" "1"
```

k==2 and k==3 give close to the same result. See [here](#) for more details on knn and choosing k, and [here](#) for a justification of knn as an appropriate tool for classifying gene expression

## Go term enrichment for forager- and nurse-upregulated genes, output to table

```
#load go terms, and append
go <- dbGetQuery(mydb,'SELECT gene, GO FROM blast2go JOIN genes_isoforms ON
genes_isoforms.isoform = blast2go.isoform WHERE go != ""')
go$evidence <- "ISS"
go <- go[,c("GO","evidence","gene")]
dbDisconnect(mydb)

## [1] TRUE

universe <- unique(go$gene)
goFrame=GOFrame(go[go$gene %in% universe,],organism="Monomorium pharaonis")
goAllFrame=GOAllFrame(goFrame)
gsc <- GeneSetCollection(goAllFrame, setType = GOCollection())

# GO terms overrepresented in forager-upregulated genes
forager_upreg_go <- hyperGTest(GSEAGOHyperGParams(name = "worker upregulated",
  geneSetCollection=gsc, geneIds = intersect(forager_names,universe),
  universeGeneIds=universe,ontology = "BP",pvalueCutoff = 0.05,
  conditional = FALSE,testDirection = "over"))
go_forager_up<-cbind(summary(forager_upreg_go),"forager_upregulated_genes","overrepresented")
colnames(go_forager_up)<-c("GOBPID","Pvalue","OddsRatio","ExpCount",
  "Count","Size","GOTerm","GeneCategory","Direction")

# GO terms underrepresented in forager-upregulated genes
forager_downreg_go <- hyperGTest(GSEAGOHyperGParams(name = "worker upregulated",
  geneSetCollection=gsc, geneIds = intersect(forager_names,universe),
  universeGeneIds=universe,ontology = "BP",pvalueCutoff = 0.05,conditional = FALSE,
  testDirection = "under"))
go_forager_down<-cbind(summary(forager_upreg_go),"forager_upregulated_genes",
  "underrepresented")
colnames(go_forager_down)<-c("GOBPID","Pvalue","OddsRatio","ExpCount","Count",
  "Size","GOTerm","GeneCategory","Direction")

# GO terms overrepresneted in nurse-upregulated genes
nurse_upreg_go <- hyperGTest(GSEAGOHyperGParams(name = "worker upregulated",
  geneSetCollection=gsc, geneIds = intersect(nurse_names,universe),
  universeGeneIds=universe,ontology = "BP",pvalueCutoff = 0.05,conditional = FALSE,
  testDirection = "over"))
```

```

go_nurse_up<-cbind(summary(nurse_upreg_go),"nurse_upregulated_genes","overrepresented")
colnames(go_nurse_up)<-c("GOBPID","Pvalue","OddsRatio","ExpCount","Count","Size",
  "GOTerm","GeneCategory","Direction")

# GO terms underrepresneted in nurse-upregulated genes
nurse_downreg_go <- hyperGTest(GSEAGOHyperGParams(name = "worker upregulated",
  geneSetCollection=gsc,geneIds = intersect(nurse_names,universe),
  universeGeneIds=universe,ontology = "BP",pvalueCutoff = 0.05,conditional = FALSE,
  testDirection = "under"))
go_nurse_down<-cbind(summary(nurse_upreg_go),"nurse_upregulated_genes","underrepresented")
colnames(go_nurse_down)<-c("GOBPID","Pvalue","OddsRatio","ExpCount","Count","Size",
  "GOTerm","GeneCategory","Direction")

goanalysis<-rbind(go_forager_up,go_forager_down,go_nurse_up,go_nurse_down)
write.csv(goanalysis,file="GOanalysis.csv")

write.table(go_forager_up,file="GOanalysis.csv",append=TRUE,sep=",")
colnames(go_forager_up)<-c("GOBPID","Pvalue","OddsRatio","ExpCount","Count","Size",
  "GOTerm","GeneCategory","Direction")

```

## WGCNA

```

datExpr <- data.frame(t(log(fpkm[keep,]+1,2)))
names(datExpr) <- rownames(counts[keep,])
rownames(datExpr) <- colnames(counts[keep,])

#initial exploration, barplot of mean expression per sample and sample quick dendrogram
meanExpressionByArray=apply(datExpr,1,mean,na.rm=T)
NumberMissingByArray=apply(is.na(data.frame(datExpr)),1,sum)
barplot(meanExpressionByArray,xlab="Sample",ylab="Mean expression",
  main="mean expression across samples",cex.names=0.7)

```

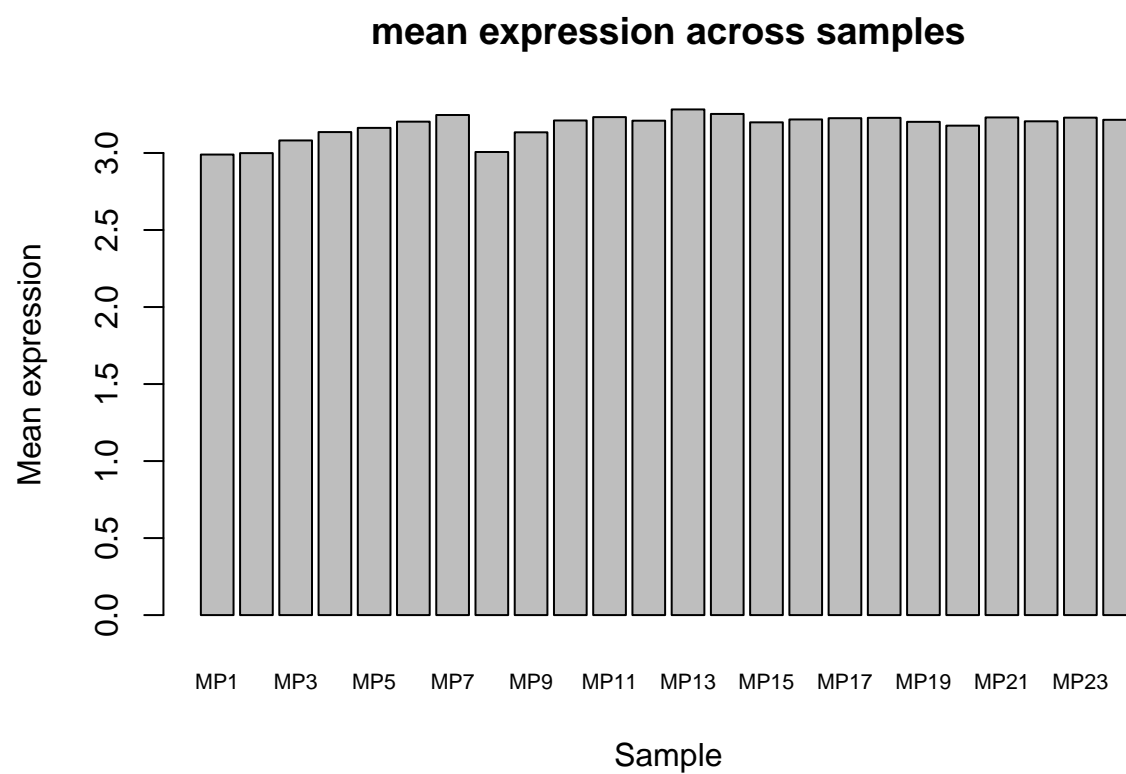

```
plotClusterTreeSamples(datExpr=datExpr)
```

## Sample dendrogram

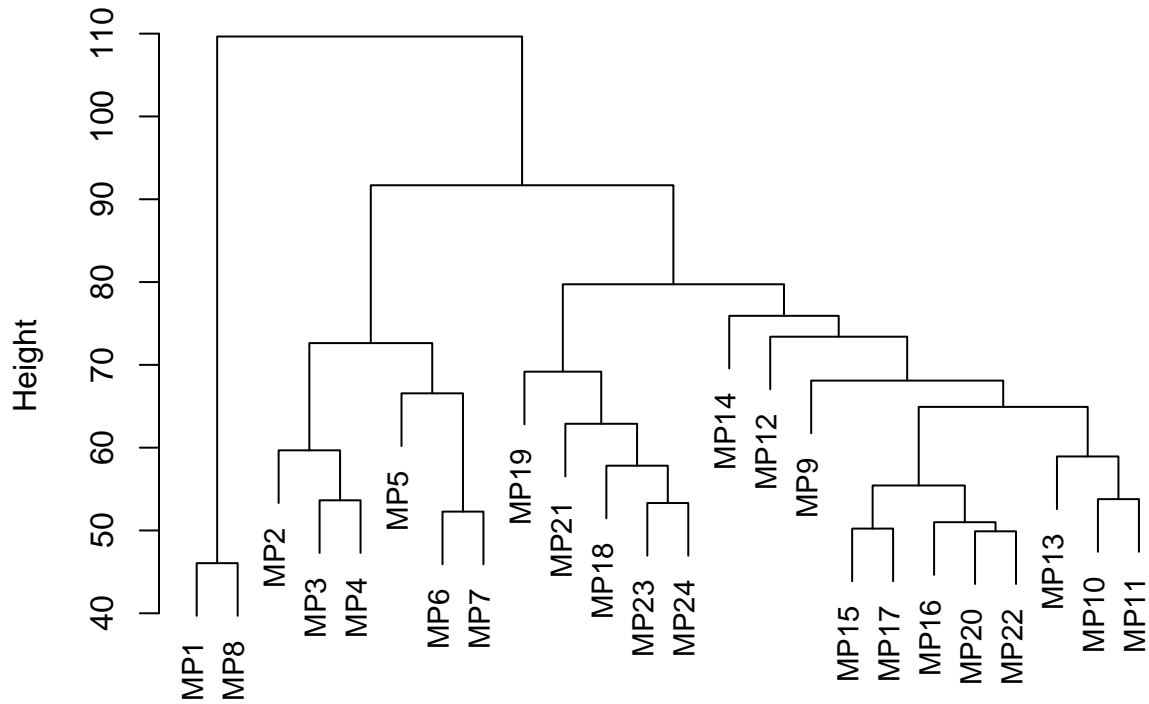

```
## NULL
```

```
#following FemaleLiver-01-dataInput.pdf
gsg=goodSamplesGenes(datExpr,verbose=3);
```

```
## Flagging genes and samples with too many missing values...
## ..step 1
```

```
gsg$allOK    # allOK
```

```
## [1] TRUE
```

```
datExpr0=datExpr[gsg$goodSamples,gsg$goodGenes]
sampleTree=flashClust(dist(datExpr0),method="average");
```

```
#following FemaleLiver-02-networkConstr-auto.pdf
powers=c(c(1:10),seq(from=12,to=16,by=2))
allowWGCNAThreads()
```

```
## Allowing multi-threading with up to 8 threads.
```

```
sft=pickSoftThreshold(datExpr0,powerVector=powers,verbose=5)
```

```
## pickSoftThreshold: will use block size 17371.
## pickSoftThreshold: calculating connectivity for given powers...
## ..working on genes 1 through 17371 of 17371
## Power SFT.R.sq slope truncated.R.sq mean.k. median.k. max.k.
## 1      1  0.4200  1.280      0.937  5460.0  5520.00  8290
## 2      2  0.0421 -0.193      0.776  2510.0  2460.00  5140
## 3      3  0.4260 -0.684      0.808  1380.0  1270.00  3550
## 4      4  0.6100 -0.913      0.856   843.0   712.00  2610
## 5      5  0.6900 -1.060      0.878   553.0   426.00  2000
## 6      6  0.7310 -1.140      0.892   382.0   265.00  1580
## 7      7  0.7540 -1.210      0.896   274.0   171.00  1270
## 8      8  0.7800 -1.240      0.910   203.0   113.00  1050
## 9      9  0.8030 -1.270      0.924   154.0    76.40   871
## 10     10 0.8230 -1.280      0.938   119.0    52.80   737
## 11     12 0.8490 -1.310      0.955    75.1    26.40   546
## 12     14 0.8670 -1.330      0.964    49.9    14.00   416
## 13     16 0.8670 -1.370      0.966    34.5     7.74   330
```

```
#to graph results
```

```
par(mfrow=c(1,2));
cex=0.9;
plot(sft$fitIndices[,1],-sign(sft$fitIndices[,3])*sft$fitIndices[,2],
     xlab="Soft threshold(power)",ylab="Scale free topology model fit, signed R^2",type="n",
     main=paste("Scale independence"));
text(sft$fitIndices[,1],-sign(sft$fitIndices[,3])*sft$fitIndices[,2],
     labels=powers,cex=1,col="red");
abline(h=0.80,col="red")
plot(sft$fitIndices[,1],sft$fitIndices[,5],
     xlab="Soft threshold(power)",ylab="Mean connectivity",type="n",
     main=paste("Mean connectivity"))
text(sft$fitIndices[,1],sft$fitIndices[,5],labels=powers,cex=1,col="red")
```

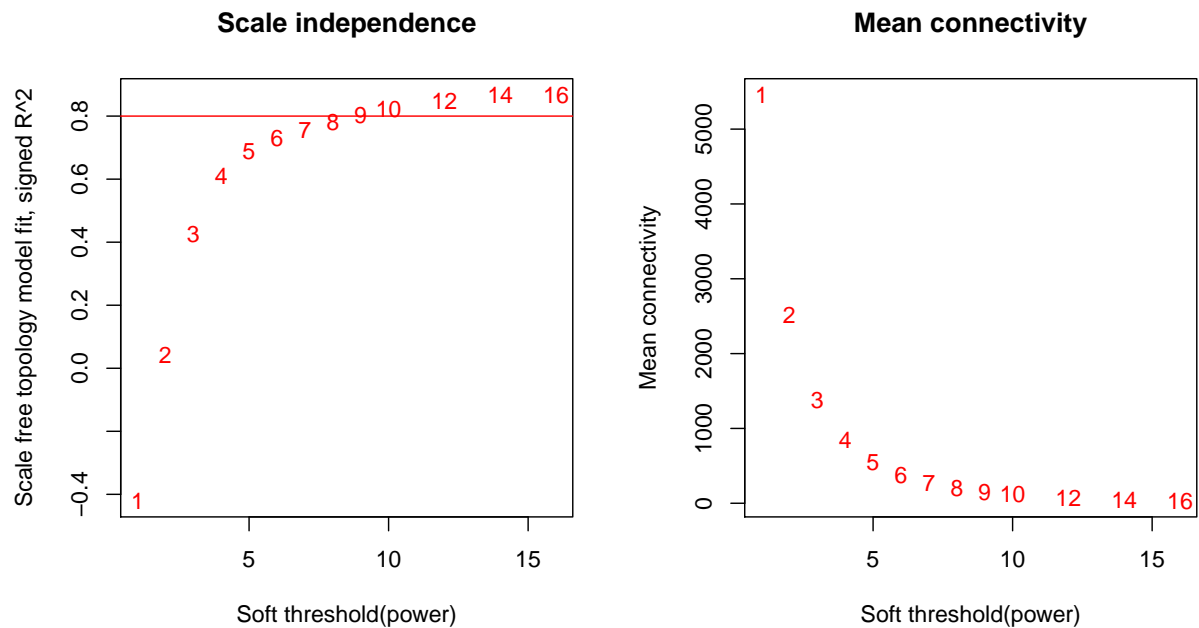

Power 9 is greater than .8, so we'll use it.

```
adjacency = adjacency(datExpr, power = 9, type="signed")
TOM = TOMsimilarity(adjacency, TOMType="signed")
```

```
datt <- datExpr

# Call the hierarchical clustering function
geneTree = flashClust(as.dist(1-TOM), method = "average");

# set the minimum module size to something relatively large
minModuleSize = 30;

# Module identification using dynamic tree cut:
dynamicMods = cutreeDynamic(dendro = geneTree, distM = 1-TOM, deepSplit = 2,
  pamRespectsDendro = FALSE, minClusterSize = minModuleSize);
```

```
## ..cutHeight not given, setting it to 0.983 ==> 99% of the (truncated) height range in dendro.
## ..done.
```

```
table(dynamicMods)
```

```
## dynamicMods
##   1    2    3    4    5    6    7    8    9   10   11   12   13   14   15
## 3039 1966 1873 1653 1206 1179  598  554  476  459  407  332  285  284  278
##   16   17   18   19   20   21   22   23   24   25   26   27   28   29   30
##  246  223  217  194  193  158  127  126  125  120  115  113  106   98   90
##   31   32   33   34   35   36   37
##   88   83   81   81   76   74   48
```

```

dynamicColors = labels2colors(dynamicMods)

# Calculate eigengenes
MEList = moduleEigengenes(datt, colors = dynamicColors)
MEs = MEList$eigengenes

# Calculate dissimilarity of module eigengenes
METree = flashClust(as.dist(1-cor(MEs)), method = "average");
plot(METree, main = "Clustering of module eigengenes", xlab = "", sub = "")
MEDissThres = 0.25

# Plot the cut line into the dendrogram
abline(h=MEDissThres, col = "red")

```

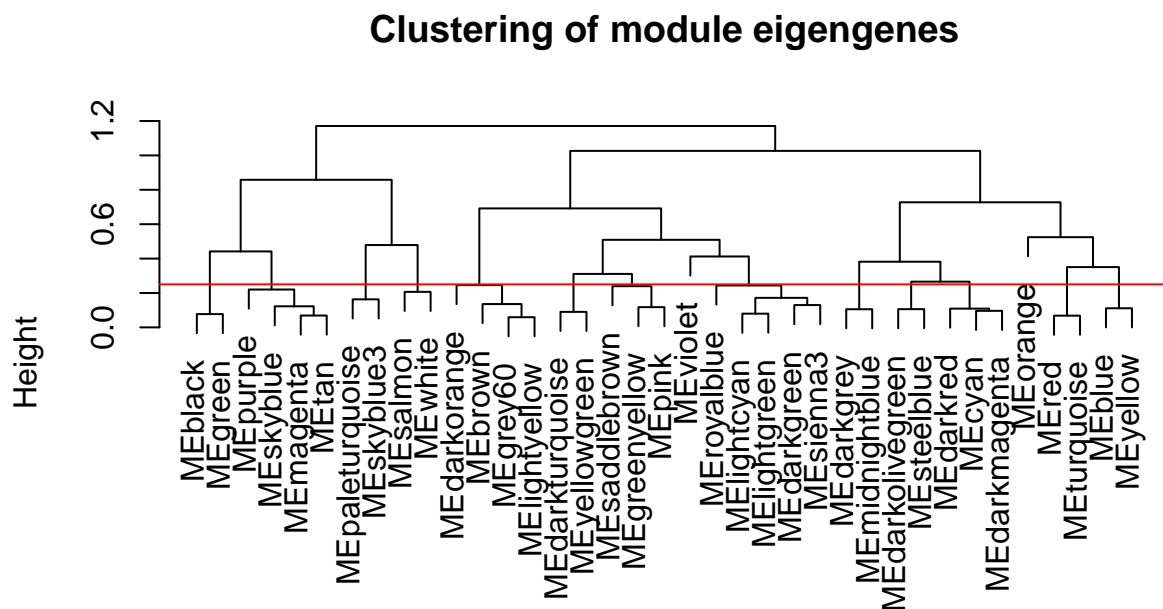

```

# Call an automatic merging function
merge <- mergeCloseModules(datt, dynamicColors, cutHeight = MEDissThres, verbose = 0)

# The merged module colors
mergedColors = merge$colors

# Eigengenes of the new merged modules:
mergedMEs = merge$newMEs

# plotting the cluster dendrogram
plotDendroAndColors(geneTree, cbind(dynamicColors, mergedColors),

```

```
c("Dynamic Tree Cut", "Merged dynamic"),
dendroLabels = FALSE, hang = 0.03,
addGuide = TRUE, guideHang = 0.05)
```

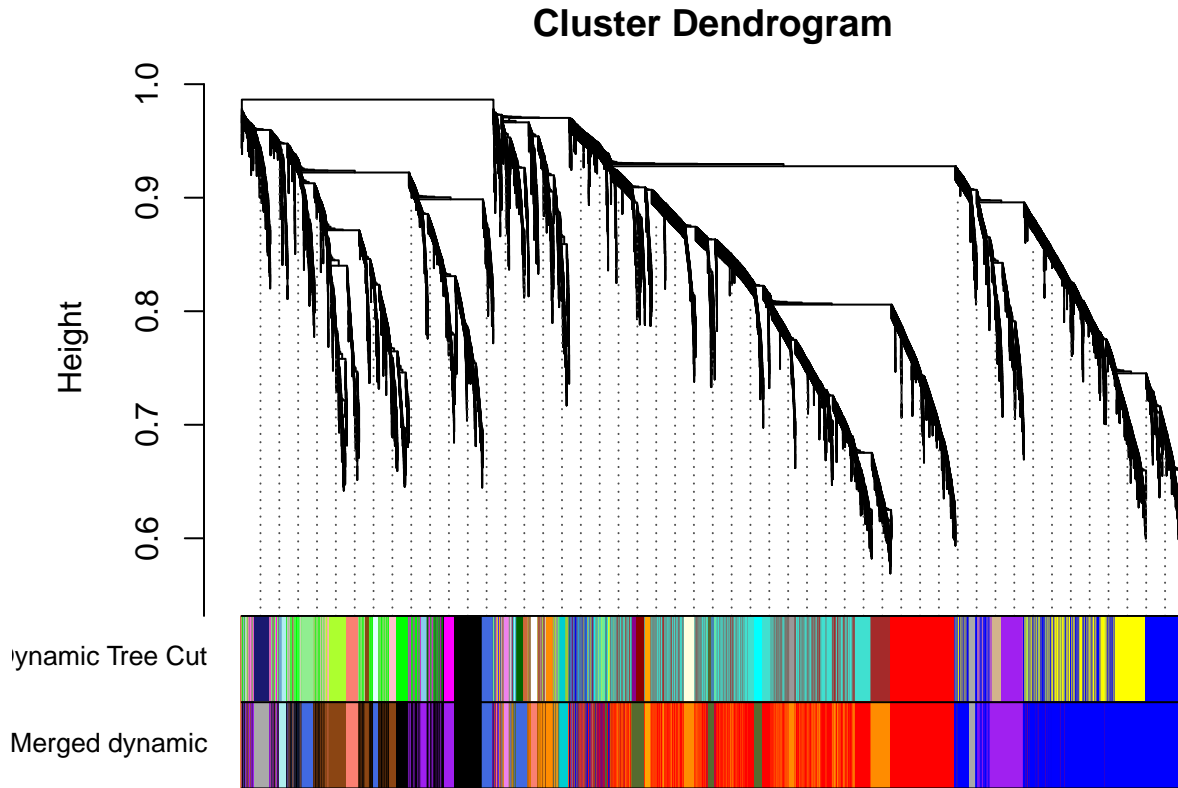

```
# Rename to moduleColors
moduleColors = mergedColors

# Construct numerical labels corresponding to the colors
colorOrder = c("grey", standardColors(50));
moduleLabels = match(moduleColors, colorOrder)-1;
MEs = mergedMEs;

# Define numbers of genes and samples
nGenes = ncol(datt);
nSamples = nrow(datt);

# Recalculate MEs with color labels
invisible(MEs0 <- moduleEigengenes(datt, moduleColors)$eigengenes)
MEs = orderMEs(MEs0)
MEs<-MEs[,order(names(MEs))]

# correlations of genes with eigengenes
moduleGeneCor=cor(MEs,datt)
moduleGenePvalue = corPvalueStudent(moduleGeneCor, nSamples);
```

```
# how many genes in each module?
table(moduleColors)
```

```
## moduleColors
##          black          blue          darkgrey darkolivegreen          darkorange
##          1804          3619           403           694           2405
## darkturquoise          orange paleturquoise          purple           red
##           200           120           136           1373           4218
##          royalblue saddlebrown          salmon          violet
##           859           1059           398           83
```

```
connectivity <- intramodularConnectivity(adjacency,merge$colors)
```

go-term enrichment in modules, output in table

```
modules<-c("saddlebrown","salmon","black","paleturquoise","royalblue","violet",
"darkturquoise","darkorange","darkolivegreen","red","orange","purple","darkgrey","blue")

for (i in 1:length(modules)) {
  module_genes <- rownames(counts[keep,])[moduleColors == modules[i]]
  module_upreg <- hyperGTest(GSEAGOHyperGParams(name = paste(modules[i],"upregulated"),
geneSetCollection=gsc,geneIds = intersect(module_genes,universe),
universeGeneIds=universe,ontology = "BP",pvalueCutoff = 0.05,conditional = FALSE,
testDirection = "over"))
  module_upreg1<-cbind(summary(module_upreg),i,modules[i])
  colnames(module_upreg1)<-c("GOBPID","Pvalue","OddsRatio","ExpCount","Count",
"Size","GOTerm","ModuleNumber","ModuleColor")
  write.table(module_upreg1,file="GOmodule.csv",append=TRUE,sep=" ",row.names=FALSE)
}
```

module-trait correlations

```
plot_order <- c(8,1,5,6,7,2,3,4,9)
traits = cbind(subset(design, select = -c(troph,groom, carb,prot)),forager=design[,"prot"]+
design[,"carb"])[,plot_order]

moduleTraitCor = cor(MEs, traits, use = "p")
moduleTraitPvalue = p.adjust(corPvalueStudent(moduleTraitCor, nSamples=nrow(MEs)),method="fdr")

textMatrix = paste(signif(moduleTraitCor, 2), "\n(",
signif(moduleTraitPvalue, 1), ")", sep = "");
dim(textMatrix) = dim(moduleTraitCor)
par(mar = c(6, 8.5, 3, 3));

# Display the correlation values within a heatmap plot
labeledHeatmap(Matrix = moduleTraitCor,
xLabels = colnames(moduleTraitCor),
yLabels = names(MEs),
```

```

ySymbols = names(MEs),
colorLabels = FALSE,
colors = blueWhiteRed(50),
textMatrix = textMatrix,
setStdMargins = FALSE,
cex.text = .5,
zlim = c(-1,1),
main = paste("Module-trait relationships"))

```

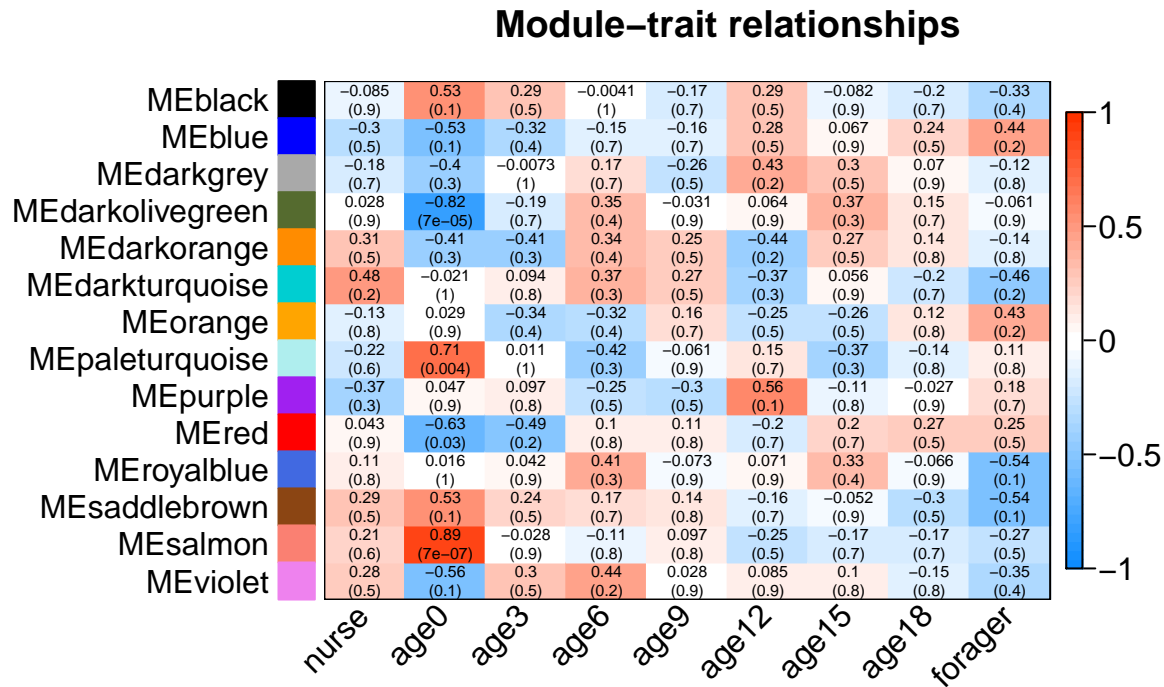

```

mycols <- colorpanel(n=19,low="white",high="darkgreen")
heatmap.2(moduleTraitCor,key=FALSE,trace="none",col=mycols,Colv=NULL,labCol=colnames(traits),
density.info="none", hclustfun=function(c){hclust(c, method="complete")},margins = c(10, 4),
RowSideColors=gsub("ME", "", names(MEs)),labRow=table(moduleColors))

```

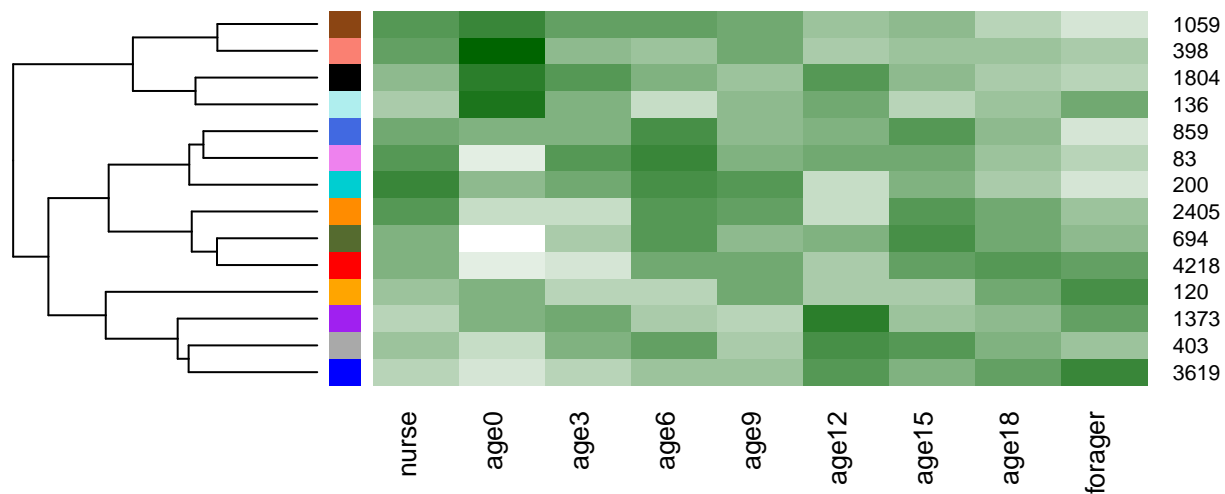

### Plotting module-age correlation coefficient over time

```
moduleTraitCor_stack <- melt(moduleTraitCor)
colnames(moduleTraitCor_stack) <- c("module", "stage", "corr")
moduleTraitCor_stack$stage <- factor(moduleTraitCor_stack$stage, unique(moduleTraitCor_stack[, 2]))
ggplot(subset(moduleTraitCor_stack, stage != "nurse" & stage != "forager"), aes(x=stage, y=corr,
  color=module, group=module)) + geom_line() + theme_bw()
```

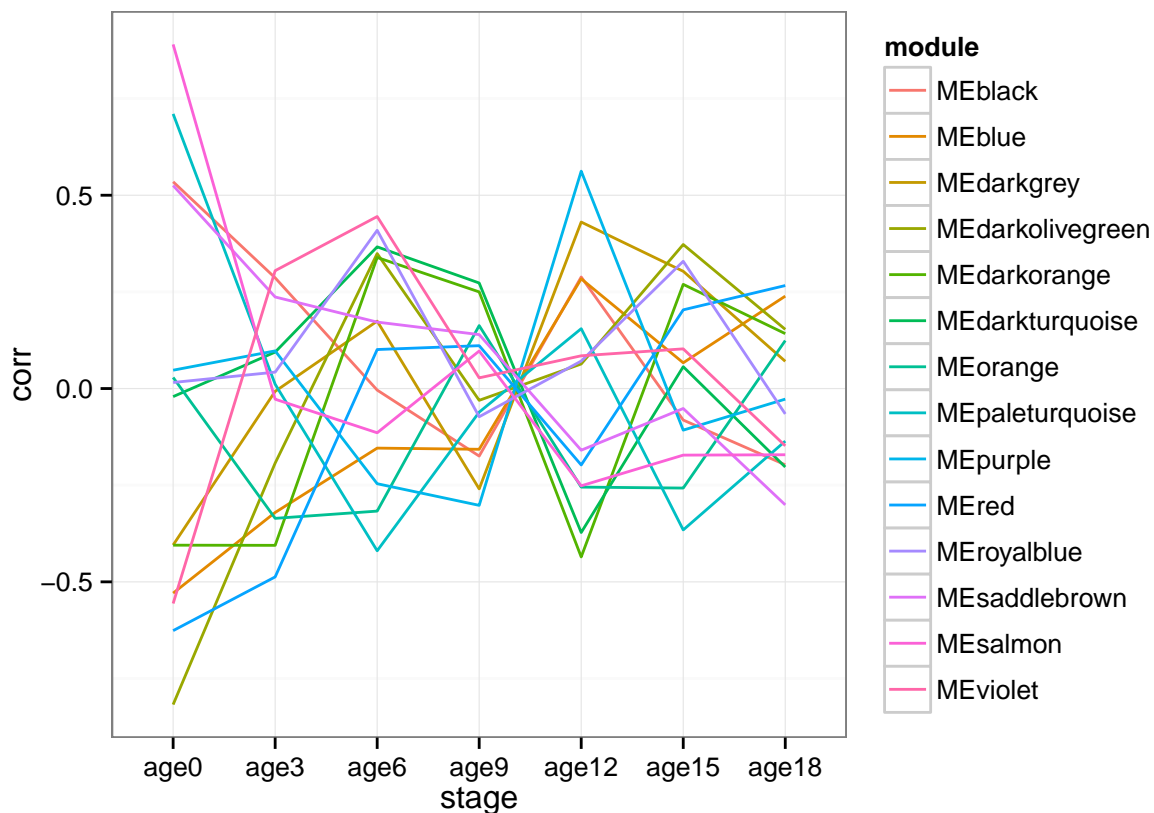

```
pvals <- c()
for (i in 1:nrow(moduleTraitCor))
  pvals <- c(pvals , cor.test(t(moduleTraitCor)[-c(1,9),i],seq(0,18,3))$p.value)
unique(names(MEs))[p.adjust(pvals,method="fdr")<.05]
```

```
## [1] "MEblue" "MESaddlebrown"
```

*#the saddlebrown and blue modules are significantly correlated with age*

## Connectivity and evolution

This section examines whether connectivity plays a role in the evolution of genes.

### connectivity vs selection

Set up a data frame with connectivities and rates, and see whether total connectivity affects rates of evolution

```
genes_with_rates <- intersect(rownames(connectivity),manfredini$mp_id)
connectivity_rate <- cbind(manfredini[genes_with_rates,"rate"],
  connectivity[rownames(connectivity) %in% genes_with_rates,])
colnames(connectivity_rate) <- c("rate",names(connectivity))
#add task information
```

```

connectivity_rate$task <- "all others"
connectivity_rate[forager_names,"task"] <- "forager"
connectivity_rate[nurse_names,"task"] <- "nurse"
connectivity_rate$task <- factor(connectivity_rate$task, levels=c("all others","nurse","forager"))

#evolutionary rate and connectivity
with(connectivity_rate,cor.test(rate,kTotal,method="spearman"))

##
## Spearman's rank correlation rho
##
## data: rate and kTotal
## S = 8.002e+10, p-value = 3.125e-14
## alternative hypothesis: true rho is not equal to 0
## sample estimates:
##      rho
## -0.08686

```

There is a negative correlation between total connectivity and evolutionary rate, which is typical

## expression and connectivity

average fpkm vs connectivity

```

cor.test(rowMeans(fpkm)[rownames(connectivity_rate)],connectivity_rate$kTotal,method="spearman")

##
## Spearman's rank correlation rho
##
## data: rowMeans(fpkm)[rownames(connectivity_rate)] and connectivity_rate$kTotal
## S = 5.119e+10, p-value < 2.2e-16
## alternative hypothesis: true rho is not equal to 0
## sample estimates:
##      rho
## 0.3047

```

Highly connected genes have higher rates of expression, which is also expected.

```
kruskalmc(kTotal ~ task, data = connectivity_rate)
```

```

## Multiple comparison test after Kruskal-Wallis
## p.value: 0.05
## Comparisons
##
##      obs.dif critical.dif difference
## all others-nurse      1011      235.4      TRUE
## all others-forager    1971      215.6      TRUE
## nurse-forager        2982      305.4      TRUE

```

All tasks differ in connectivity.

## Model for joint effects of expression and network on evolution

```
connectivity_rate$fpkm <- fpkm_task[rownames(connectivity_rate), "fpkm"]
connectivity_rate$task <- fpkm_task[rownames(connectivity_rate), "task"]
connectivity_rate$task <- factor(connectivity_rate$task, levels=c("nde", "nurse", "forager"))

connectivity_rate$logFC <- et_nurse_forager$stable[rownames(connectivity_rate), "logFC"]

form1 <- log(rate) ~ factor(task)
form2 <- log(rate) ~ log(fpkm)*factor(task)+log(kTotal)*factor(task)

summary(rate1.lm <- lm(form1, data=subset(connectivity_rate, rate<10 )))
```

```
##
## Call:
## lm(formula = form1, data = subset(connectivity_rate, rate < 10))
##
## Residuals:
##      Min       1Q   Median       3Q      Max
## -4.679 -0.555  0.239  0.787  4.053
##
## Coefficients:
##              Estimate Std. Error t value Pr(>|t|)
## (Intercept)    -2.3850     0.0148  -160.73   <2e-16 ***
## factor(task)nurse    0.1564     0.0531    2.94   0.0032 **
## factor(task)forager  0.0815     0.0487    1.67   0.0944 .
## ---
## Signif. codes:  0 '***' 0.001 '**' 0.01 '*' 0.05 '.' 0.1 ' ' 1
##
## Residual standard error: 1.19 on 7596 degrees of freedom
## Multiple R-squared:  0.00141,    Adjusted R-squared:  0.00114
## F-statistic: 5.35 on 2 and 7596 DF,  p-value: 0.00475
```

```
summary(rate2.lm <-lm(form2, data=subset(connectivity_rate, rate<10 )))
```

```
##
## Call:
## lm(formula = form2, data = subset(connectivity_rate, rate < 10))
##
## Residuals:
##      Min       1Q   Median       3Q      Max
## -4.893 -0.566  0.238  0.776  4.108
##
## Coefficients:
##              Estimate Std. Error t value Pr(>|t|)
## (Intercept)    -1.684419   0.121585  -13.85 < 2e-16 ***
## log(fpkm)     -0.099207   0.013370   -7.42 1.3e-13 ***
## factor(task)nurse    0.508210   0.772553    0.66 0.51067
## factor(task)forager -0.049509   0.841200   -0.06 0.95307
## log(kTotal)     -0.074624   0.020250   -3.69 0.00023 ***
## log(fpkm):factor(task)nurse  0.071554   0.037099    1.93 0.05381 .
## log(fpkm):factor(task)forager  0.081432   0.045733    1.78 0.07501 .
```

```
## factor(task)nurse:log(kTotal) -0.086372 0.128836 -0.67 0.50262
## factor(task)forager:log(kTotal) -0.000486 0.124833 0.00 0.99690
## ---
## Signif. codes: 0 '***' 0.001 '**' 0.01 '*' 0.05 '.' 0.1 ' ' 1
##
## Residual standard error: 1.18 on 7590 degrees of freedom
## Multiple R-squared: 0.0144, Adjusted R-squared: 0.0134
## F-statistic: 13.9 on 8 and 7590 DF, p-value: <2e-16
```

```
# verifying results using bootstrap
bs <- function(formula, data, indices) {
  d <- data[indices,] # allows boot to select sample
  glm(formula, data=d)
  fit <- lm(formula, data=d)
  return(coef(fit))
}
results <- boot(data=connectivity_rate, statistic=bs, R=1000, formula=form1)

for (i in 2:length(rate1.lm$coefficients)) {
  bci <- boot.ci(results, type="basic", index=i)
  print(sprintf("%s,%.4f,%.4f,%.4f", names(rate1.lm$coefficients)[i],
    results$t0[i], bci$basic[4], bci$basic[5]))
}
```

```
## [1] "factor(task)nurse,0.1418,0.0414,0.2523"
## [1] "factor(task)forager,0.0857,-0.0103,0.1796"
```

```
results <- boot(data=connectivity_rate, statistic=bs, R=1000, formula=form2)

for (i in 2:length(rate2.lm$coefficients)) {
  bci <- boot.ci(results, type="basic", index=i)
  print(sprintf("%s,%.4f,%.4f,%.4f", names(rate2.lm$coefficients)[i],results$t0[i], bci$basic[4], bci$basic[5]))
}
```

```
## [1] "log(fpkm),-0.1037,-0.1330,-0.0726"
## [1] "factor(task)nurse,0.4304,-1.1489,2.1010"
## [1] "factor(task)forager,-0.0100,-1.5854,1.6418"
## [1] "log(kTotal),-0.0830,-0.1227,-0.0432"
## [1] "log(fpkm):factor(task)nurse,0.0761,0.0017,0.1473"
## [1] "log(fpkm):factor(task)forager,0.1085,0.0057,0.2258"
## [1] "factor(task)nurse:log(kTotal),-0.0780,-0.3542,0.1846"
## [1] "factor(task)forager:log(kTotal),-0.0152,-0.2581,0.2233"
```

## connectivity and context of expression

Here, we are interested in the regulatory context of forager- and nurse-expressed genes. This includes *all* genes, not just those with evolutionary rate estimates.

```
connectivity$task <- "all others"
connectivity[forager_names,"task"] <- "forager"
connectivity[nurse_names,"task"] <- "nurse"
```

```
connectivity$task <- factor(connectivity$task, levels=c("all others","nurse","forager"))
kruskalmc(kTotal ~ task, data = connectivity)
```

```
## Multiple comparison test after Kruskal-Wallis
## p.value: 0.05
## Comparisons
##          obs.dif critical.dif difference
## all others-nurse      830.9      353.9      TRUE
## all others-forager    5071.1      357.9      TRUE
## nurse-forager         5902.0      483.7      TRUE
```

```
ggplot(connectivity,aes(x=factor(task),y=kTotal))+geom_boxplot(notch=TRUE)+theme_bw()+
  ylab("connectivity")+xlab("")+scale_y_log10()
```

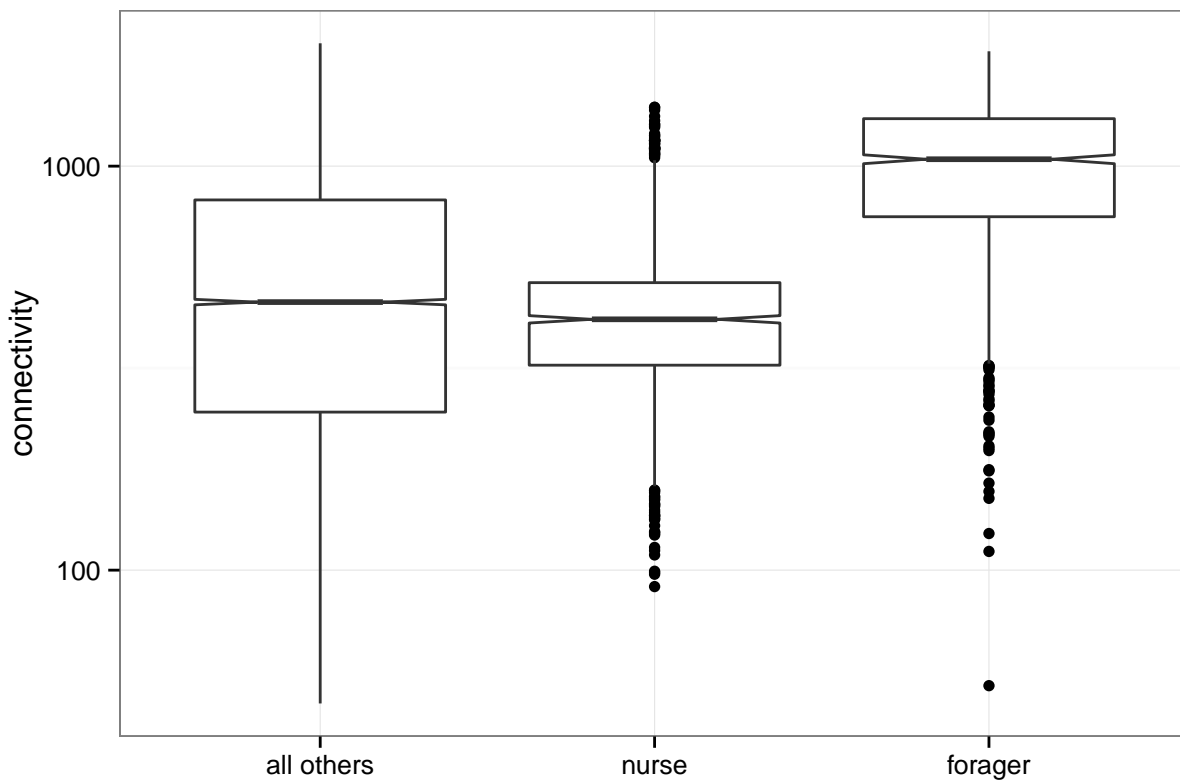

The picture is similar to what you find with genes that have rates.

### Effect of connectivity on presence of *S. invicta* or *A. mellifera* ortholog

```
connectivity$homolog <- 0
connectivity[rownames(manfredini)[rownames(manfredini) %in% rownames(connectivity)],"homolog"]<-1
kruskal.test(kTotal ~ factor(homolog), data=connectivity)
```

```
##
## Kruskal-Wallis rank sum test
##
## data: kTotal by factor(homolog)
## Kruskal-Wallis chi-squared = 724, df = 1, p-value < 2.2e-16
```

```
ggplot(connectivity,aes(factor(homolog),kTotal))+geom_violin()+facet_grid(.~task)+theme_bw()+
  stat_summary(fun.data="mean_cl_boot", geom="errorbar",width=0.1,colour = "red")
```

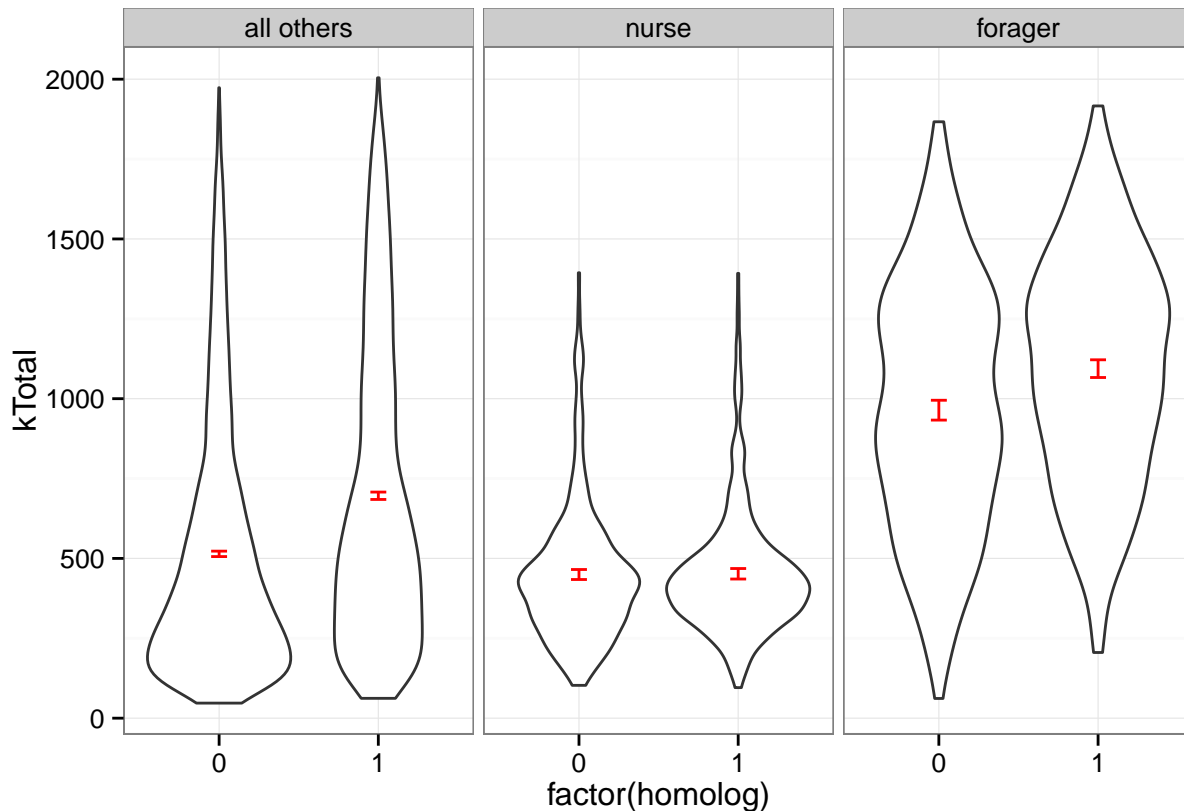

```
kruskalmc(homolog ~ task, data=connectivity)
```

```
## Multiple comparison test after Kruskal-Wallis
## p.value: 0.05
## Comparisons
##
```

|                    | obs.dif | critical.dif | difference |
|--------------------|---------|--------------|------------|
| all others-nurse   | 36.26   | 353.9        | FALSE      |
| all others-forager | 950.05  | 357.9        | TRUE       |
| nurse-forager      | 913.79  | 483.7        | TRUE       |

```
summary(glm(log(kTotal)~factor(task)*factor(homolog),data=connectivity))
```

```
##
## Call:
## glm(formula = log(kTotal) ~ factor(task) * factor(homolog), data = connectivity)
```

```
##
## Deviance Residuals:
##      Min       1Q   Median       3Q      Max
## -2.8214  -0.4966   0.0333   0.5390   1.6387
##
## Coefficients:
##                  Estimate Std. Error t value Pr(>|t|)
## (Intercept)          5.94894    0.00805   738.90 < 2e-16
## factor(task)nurse      0.05459    0.02908    1.88 0.06046
## factor(task)forager     0.81926    0.03237   25.31 < 2e-16
## factor(homolog)1        0.33506    0.01227   27.30 < 2e-16
## factor(task)nurse:factor(homolog)1 -0.30489    0.04412   -6.91 5e-12
## factor(task)forager:factor(homolog)1 -0.17047    0.04439   -3.84 0.00012
##
## (Intercept)          ***
## factor(task)nurse      .
## factor(task)forager     ***
## factor(homolog)1        ***
## factor(task)nurse:factor(homolog)1 ***
## factor(task)forager:factor(homolog)1 ***
## ---
## Signif. codes:  0 '***' 0.001 '**' 0.01 '*' 0.05 '.' 0.1 ' ' 1
##
## (Dispersion parameter for gaussian family taken to be 0.5503)
##
##      Null deviance: 10652.4  on 17370  degrees of freedom
## Residual deviance:  9556.2  on 17365  degrees of freedom
## AIC: 38930
##
## Number of Fisher Scoring iterations: 2
```

connectivity and expression is higher for forager-upregulated genes and for genes with *S. invicta* orthologs. The connectivity of forager- and nurse-upregulated genes is less affected by whether the gene has a *S. invicta* ortholog than non-differentially expressed genes

```
connectivity$beehomolog <- 0
connectivity[hbee$mp[hbee$mp %in% rownames(connectivity)],"beehomolog"] <- 1

kruskal.test(kTotal ~ factor(beehomolog), data=connectivity)
```

```
##
## Kruskal-Wallis rank sum test
##
## data: kTotal by factor(beehomolog)
## Kruskal-Wallis chi-squared = 1215, df = 1, p-value < 2.2e-16
```

```
ggplot(connectivity,aes(factor(beehomolog),kTotal))+geom_violin()+facet_grid(.~task)+theme_bw()+
  stat_summary(fun.data="mean_cl_boot", geom="errorbar",width=0.1,colour = "red")
```

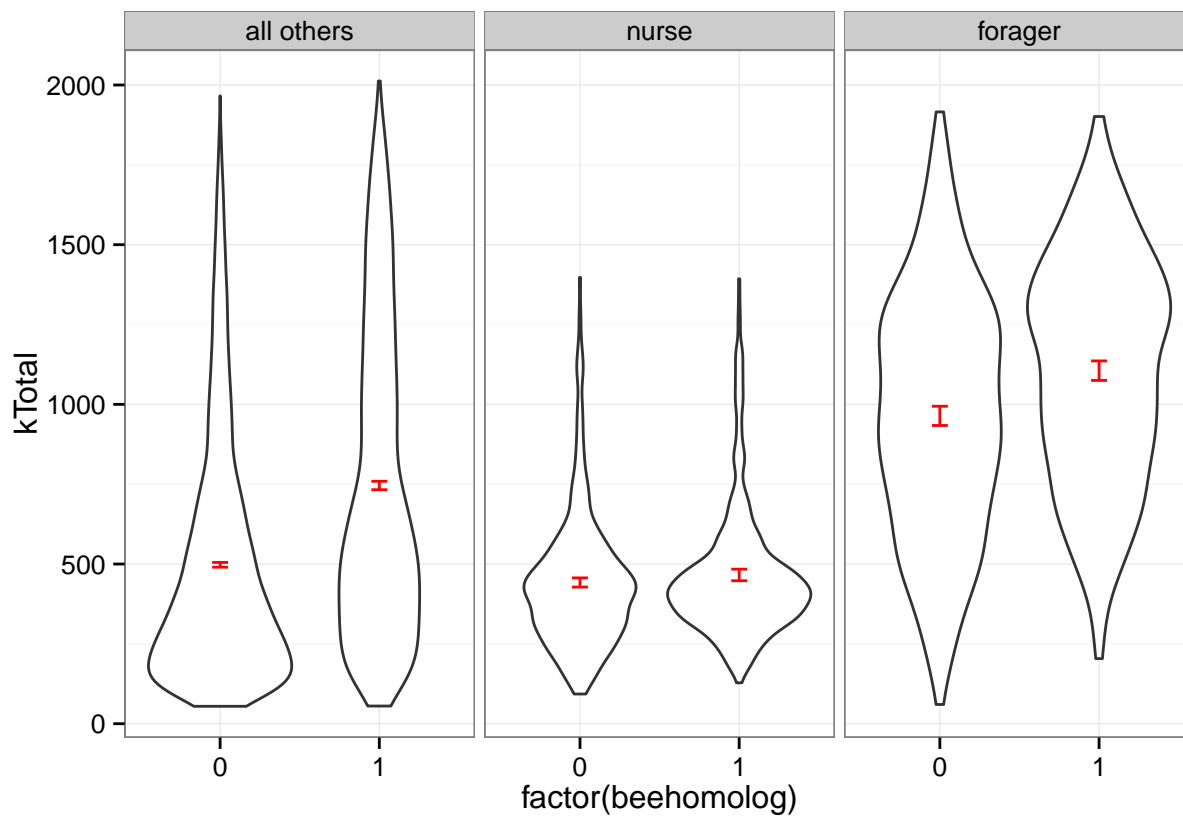

```
kruskalmc(beehomolog ~ task, data=connectivity)
```

```
## Multiple comparison test after Kruskal-Wallis
## p.value: 0.05
## Comparisons
##           obs.dif critical.dif difference
## all others-nurse      8.828      353.9    FALSE
## all others-forager 982.999      357.9     TRUE
## nurse-forager       974.172      483.7     TRUE
```

```
summary(glm(log(kTotal)~factor(task)*factor(beehomolog),data=connectivity))
```

```
##
## Call:
## glm(formula = log(kTotal) ~ factor(task) * factor(beehomolog),
##      data = connectivity)
##
## Deviance Residuals:
##      Min       1Q   Median       3Q      Max
## -2.8234  -0.4914   0.0307   0.5359   1.6672
##
## Coefficients:
##              Estimate Std. Error t value
## (Intercept)      5.9205    0.0076  778.59
```

```
## factor(task)nurse          0.0669      0.0274      2.44
## factor(task)forager        0.8497      0.0304     27.94
## factor(beehomolog)1        0.4517      0.0123     36.73
## factor(task)nurse:factor(beehomolog)1 -0.3753      0.0442     -8.48
## factor(task)forager:factor(beehomolog)1 -0.2764      0.0436     -6.34
##                               Pr(>|t|)
## (Intercept)                < 2e-16 ***
## factor(task)nurse           0.015 *
## factor(task)forager         < 2e-16 ***
## factor(beehomolog)1         < 2e-16 ***
## factor(task)nurse:factor(beehomolog)1 < 2e-16 ***
## factor(task)forager:factor(beehomolog)1 2.4e-10 ***
## ---
## Signif. codes:  0 '***' 0.001 '**' 0.01 '*' 0.05 '.' 0.1 ' ' 1
##
## (Dispersion parameter for gaussian family taken to be 0.5324)
##
## Null deviance: 10652.4 on 17370 degrees of freedom
## Residual deviance: 9245.6 on 17365 degrees of freedom
## AIC: 38356
##
## Number of Fisher Scoring iterations: 2
```

similarly, connectivity is higher for forager-upregulated genes and for genes with *A. mellifera* orthologs. The connectivity of forager- and nurse-upregulated genes is less affected by whether the gene has a *A. mellifera* ortholog than non-differentially expressed genes

```
connectivity$fpkm <- rowMeans(fpkm[keep,])
summary(glm(homolog~fpkm*factor(task)+kTotal*factor(task),family=quasibinomial,data=connectivity))
```

```
##
## Call:
## glm(formula = homolog ~ fpkm * factor(task) + kTotal * factor(task),
##      family = quasibinomial, data = connectivity)
##
## Deviance Residuals:
##      Min       1Q   Median       3Q      Max
## -1.637  -1.030  -0.892   1.270   2.802
##
## Coefficients:
##              Estimate Std. Error t value Pr(>|t|)
## (Intercept)    -8.53e-01  2.89e-02 -29.50 < 2e-16 ***
## fpkm           -1.25e-05  3.06e-05  -0.41  0.6831
## factor(task)nurse    5.59e-01  1.40e-01   4.00 6.4e-05 ***
## factor(task)forager  -1.00e-03  1.76e-01  -0.01  0.9955
## kTotal           9.58e-04  3.92e-05  24.46 < 2e-16 ***
## fpkm:factor(task)nurse -1.37e-05  5.33e-05  -0.26  0.7974
## fpkm:factor(task)forager -6.69e-04  2.87e-04  -2.33  0.0198 *
## factor(task)nurse:kTotal -8.82e-04  2.78e-04  -3.17  0.0015 **
## factor(task)forager:kTotal 6.29e-05  1.66e-04   0.38  0.7050
## ---
## Signif. codes:  0 '***' 0.001 '**' 0.01 '*' 0.05 '.' 0.1 ' ' 1
##
```

```
## (Dispersion parameter for quasibinomial family taken to be 1.002)
##
##      Null deviance: 23817  on 17370  degrees of freedom
## Residual deviance: 23088  on 17362  degrees of freedom
## AIC: NA
##
## Number of Fisher Scoring iterations: 4
```

The likelihood of a gene to have a *S. invicta* ortholog is most strongly determined by its connectivity.

```
summary(glm(beehomolog~fpkm*factor(task)+kTotal*factor(task),family=quasibinomial,
            data=connectivity))
```

```
##
## Call:
## glm(formula = beehomolog ~ fpkm * factor(task) + kTotal * factor(task),
##      family = quasibinomial, data = connectivity)
##
## Deviance Residuals:
##      Min       1Q   Median       3Q      Max
## -1.755  -0.943  -0.779   1.238   1.902
##
## Coefficients:
##              Estimate Std. Error t value Pr(>|t|)
## (Intercept)    -1.28e+00   3.05e-02  -41.82  < 2e-16 ***
## fpkm           -4.88e-06   2.88e-05   -0.17  0.8654
## factor(task)nurse    5.63e-01   1.42e-01    3.95  7.7e-05 ***
## factor(task)forager   1.50e-01   1.79e-01    0.84  0.4024
## kTotal           1.31e-03   4.05e-05   32.23  < 2e-16 ***
## fpkm:factor(task)nurse -1.33e-05  4.41e-05   -0.30  0.7624
## fpkm:factor(task)forager -8.88e-04  3.44e-04   -2.58  0.0098 **
## factor(task)nurse:kTotal -7.75e-04  2.80e-04   -2.76  0.0057 **
## factor(task)forager:kTotal -1.90e-04  1.67e-04   -1.14  0.2553
## ---
## Signif. codes:  0 '***' 0.001 '**' 0.01 '*' 0.05 '.' 0.1 ' ' 1
##
## (Dispersion parameter for quasibinomial family taken to be 0.9974)
##
##      Null deviance: 23238  on 17370  degrees of freedom
## Residual deviance: 22001  on 17362  degrees of freedom
## AIC: NA
##
## Number of Fisher Scoring iterations: 4
```

similarly, the likelihood of a gene to have a *A. mellifera* ortholog is most strongly determined by its connectivity.

```
summary(beehomolog~task,data=connectivity)
```

```
## beehomolog      N=17371
##
## +-----+-----+-----+-----+
## |           |           |N     |beehomolog|
```

```
## +-----+-----+-----+-----+
## |task   |all others|14907|0.3823  |
## |       |nurse    | 1247|0.3833  |
## |       |forager  | 1217|0.4955  |
## +-----+-----+-----+-----+
## |Overall|         |17371|0.3903  |
## +-----+-----+-----+-----+
```

```
with(connectivity,table(beehomolog,task))
```

```
##           task
## beehomolog all others nurse forager
##           0      9208   769    614
##           1      5699   478    603
```

```
chisq.test(with(connectivity,table(beehomolog,task)))
```

```
##
## Pearson's Chi-squared test
##
## data:  with(connectivity, table(beehomolog, task))
## X-squared = 60.84, df = 2, p-value = 6.153e-14
```

49% of forager-upregulated genes have honey bee orthologs, compared to 38% for nurse-upregulated and non-differentially expressed genes

```
summary(homolog~task,data=connectivity)
```

```
## homolog    N=17371
##
## +-----+-----+-----+-----+
## |       |         |N    |homolog|
## +-----+-----+-----+-----+
## |task   |all others|14907|0.4305 |
## |       |nurse    | 1247|0.4346 |
## |       |forager  | 1217|0.5399 |
## +-----+-----+-----+-----+
## |Overall|         |17371|0.4384 |
## +-----+-----+-----+-----+
```

```
with(connectivity,table(homolog,task))
```

```
##           task
## homolog all others nurse forager
##           0      8490   705    560
##           1      6417   542    657
```

```
chisq.test(with(connectivity,table(homolog,task)))
```

```
##
## Pearson's Chi-squared test
##
## data: with(connectivity, table(homolog, task))
## X-squared = 54.76, df = 2, p-value = 1.288e-12
```

similarly, forager-upregulated genes are much more likely to have fire ant orthologs (54%) compared to nurse-upregulated and non-differentially expressed genes (43%)

```
con<-as.data.table(connectivity)
con$hom<-"none"
con[homolog=="1" & beehomolog=="1", hom :="both"]
con[homolog=="1" & beehomolog=="0", hom :="Sinv only"]
con[homolog=="0" & beehomolog=="1", hom :="Amel only"]
con[homolog=="0" & beehomolog=="0", hom :="neither"]
con$hom<-factor(con$hom,levels=c("both","neither","Amel only","Sinv only"))
```

```
with(con,table(hom,task))
```

```
##           task
## hom      all others nurse forager
## both           4739   395   521
## neither          7530   622   478
## Amel only          960    83    82
## Sinv only         1678   147   136
```

```
chisq.test(with(con,table(hom,task)))
```

```
##
## Pearson's Chi-squared test
##
## data: with(con, table(hom, task))
## X-squared = 71.42, df = 6, p-value = 2.093e-13
```

forager-upregulated genes are more likely to have both fire ant and honey bee orthologs

Overall, highly connected genes are more likely to have a ortholog, and correspondingly forager-upregulated genes are more conserved.

## Summary plots

```
#connectivity vs. honey bee ortholog
fmt <- function() function(x) formatC(signif(x,digits=3), digits=2,format="fg")
connectivity$task<-factor(connectivity$task,labels=c("NDE","Nurse","Forager"))
connectivity$beehomolog<-factor(connectivity$beehomolog,labels=c("No","Yes"))
beeortholog_plot<-ggplot(connectivity,aes(factor(beehomolog),kTotal,fill=task,alpha=0.2))+
  geom_violin()+facet_grid(.~task)+theme_bw()+
  ylab("Connectivity (kTotal)") + scale_y_log10()+
  xlab("Honey bee ortholog") +
```

```

scale_fill_manual(values=c("grey", "blue", "red"))+
theme(legend.position="none")+theme(plot.margin=unit(c(0,0.5,0.5,0.5), "cm"),
axis.text.y = element_text(size=14),axis.text.x = element_text(size=14),
axis.title.y = element_text(size=20),axis.title.x = element_text(size=20))+
ggtitle("")+
theme(strip.text.x = element_text(size=16),
      strip.background = element_rect(fill="cornsilk1"))+
stat_summary(fun.data="mean_cl_boot", geom="errorbar",width=0.15,alpha=1,size=1,colour = "black")
beeortholog_plot

```

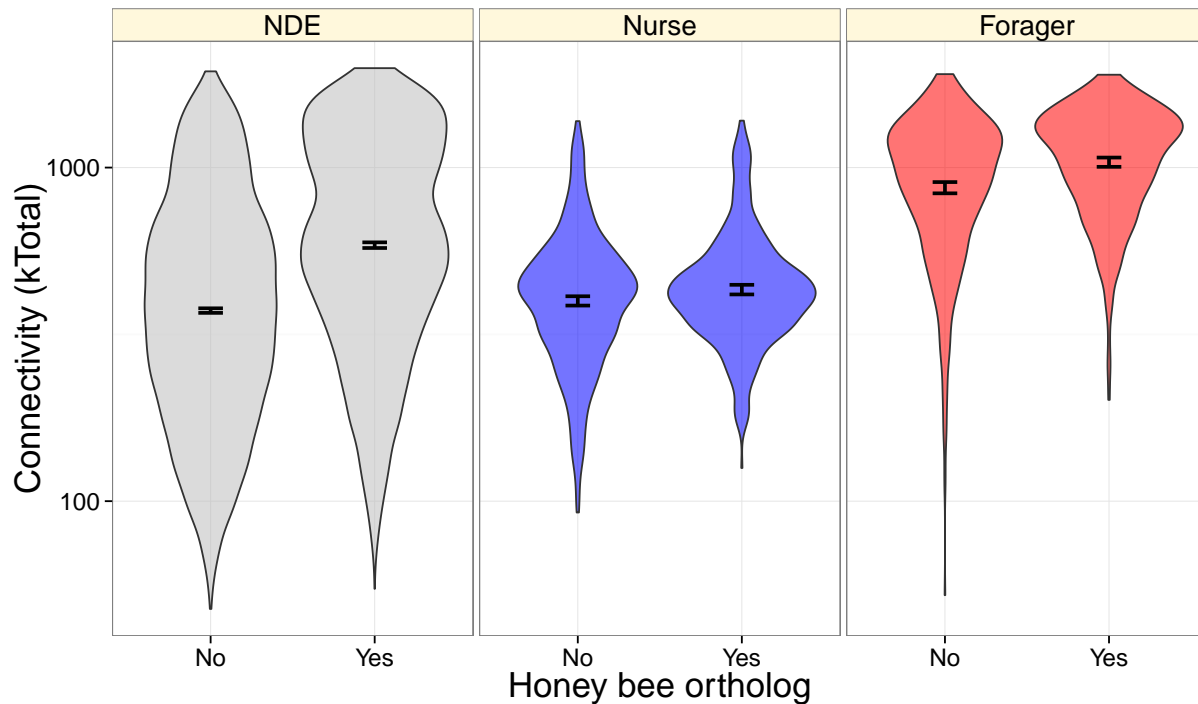

```

#connectivity vs. fire ant ortholog
connectivity$homolog<-factor(connectivity$homolog,labels=c("No","Yes"))
antortholog_plot<-ggplot(connectivity,aes(factor(homolog),kTotal,fill=task,alpha=0.2))+
  geom_violin()+facet_grid(.~task)+theme_bw()+
  ylab("Connectivity (kTotal)") + scale_y_log10()+
  xlab("Fire ant ortholog")+
  scale_fill_manual(values=c("grey", "blue", "red"))+
  theme(legend.position="none")+theme(plot.margin=unit(c(0,0.5,0.5,0.5), "cm"),
axis.text.y = element_text(size=14),axis.text.x = element_text(size=14),
axis.title.y = element_text(size=20),axis.title.x = element_text(size=20))+
  ggtitle("")+
  theme(strip.text.x = element_text(size=16),
        strip.background = element_rect(fill="cornsilk1"))+
  stat_summary(fun.data="mean_cl_boot", geom="errorbar",width=0.15,alpha=1,size=1,colour = "black")
antortholog_plot

```

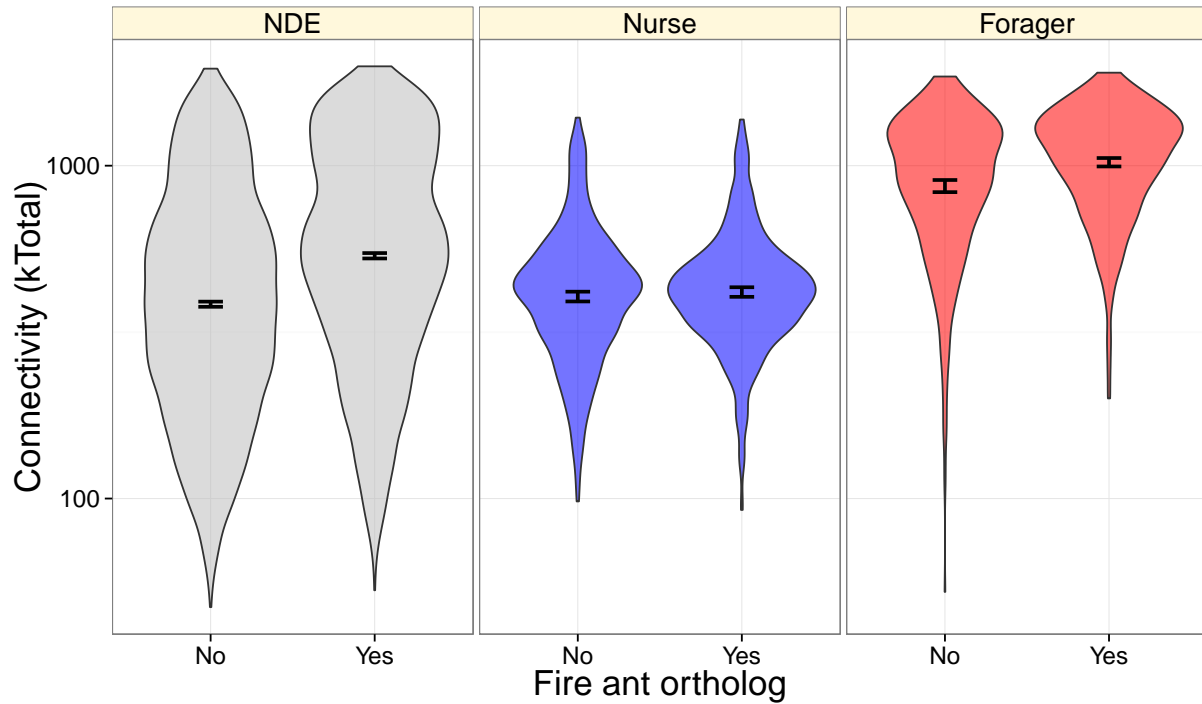

```
#expression vs. fire ant ortholog
antorthologexpression_plot<-ggplot(connectivity,aes(factor(homolog),
  fpkm,fill=task,alpha=0.2))+
  geom_violin()+facet_grid(.~task)+theme_bw()+
  ylab("Expression (FPKM)")+
  scale_y_log10(labels=fmt(),limits=c(1, 1e3))+
  xlab("Fire ant ortholog")+
  scale_fill_manual(values=c("grey","blue","red"))+
  theme(legend.position="none")+theme(plot.margin=unit(c(0,0.5,0.5,0.5), "cm"),
  axis.text.y = element_text(size=14),axis.text.x = element_text(size=14),
  axis.title.y = element_text(size=20),axis.title.x = element_text(size=20))+
  ggtitle("")+
  theme(strip.text.x = element_text(size=16),
    strip.background = element_rect(fill="cornsilk1"))+
  stat_summary(fun.data="mean_cl_boot", geom="errorbar",width=0.15,alpha=1,size=1,colour = "black")
antorthologexpression_plot
```

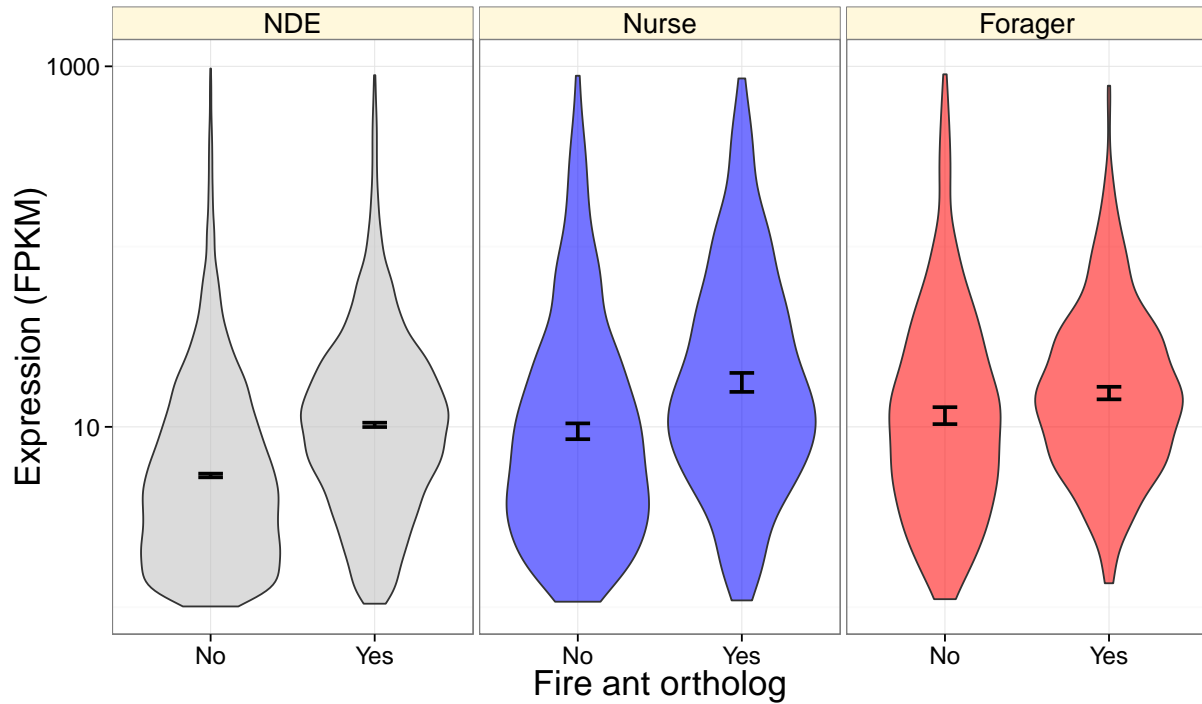

```
#expression vs. honey bee ortholog
beeorthologexpression_plot<-ggplot(connectivity,aes(factor(beeortholog),
  fpkm,fill=task,alpha=0.2))+
  geom_violin()+facet_grid(.~task)+theme_bw()+
  ylab("Expression (FPKM)")+
  scale_y_log10(labels=fmt(),limits=c(1, 1e3))+
  xlab("Honey bee ortholog")+
  scale_fill_manual(values=c("grey","blue","red"))+
  theme(legend.position="none")+theme(plot.margin=unit(c(0,0.5,0.5,0.5), "cm"),
  axis.text.y = element_text(size=14),axis.text.x = element_text(size=14),
  axis.title.y = element_text(size=20),axis.title.x = element_text(size=20))+
  ggtitle("")+
  theme(strip.text.x = element_text(size=16),
  strip.background = element_rect(fill="cornsilk1"))+
  stat_summary(fun.data="mean_cl_boot", geom="errorbar",width=0.15,alpha=1,size=1,colour = "black")
beeorthologexpression_plot
```

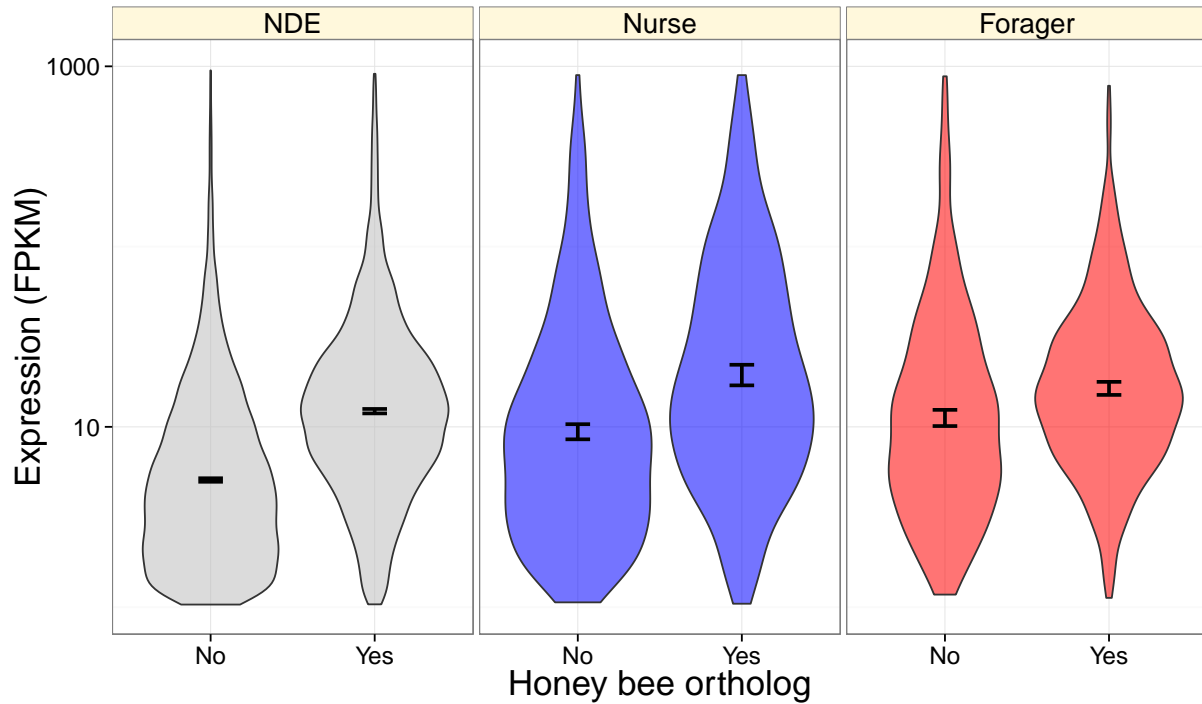

```
#connectivity vs. behavioral category
connectivity_rate$task<-factor(connectivity_rate$task,labels=c("NDE","Nurse","Forager"))
connectivity_plot <- ggplot(connectivity_rate,aes(x=factor(task),y=kTotal,fill=task,alpha=0.2))+
  geom_violin()+theme_bw()+
  ylab("Connectivity (kTotal)")+scale_y_log10()+
  xlab("")+
  scale_fill_manual(values=c("grey","blue","red"))+
  theme(legend.position="none")+theme(plot.margin=unit(c(0,0.5,0,0), "cm"),
  axis.text.y = element_text(size=14),axis.text.x = element_text(size=14),
  axis.title.y = element_text(size=20),axis.title.x = element_text(size=20))+
  stat_summary(fun.data="mean_cl_boot", geom="errorbar",width=0.15,alpha=1,size=1,colour = "black")
connectivity_plot
```

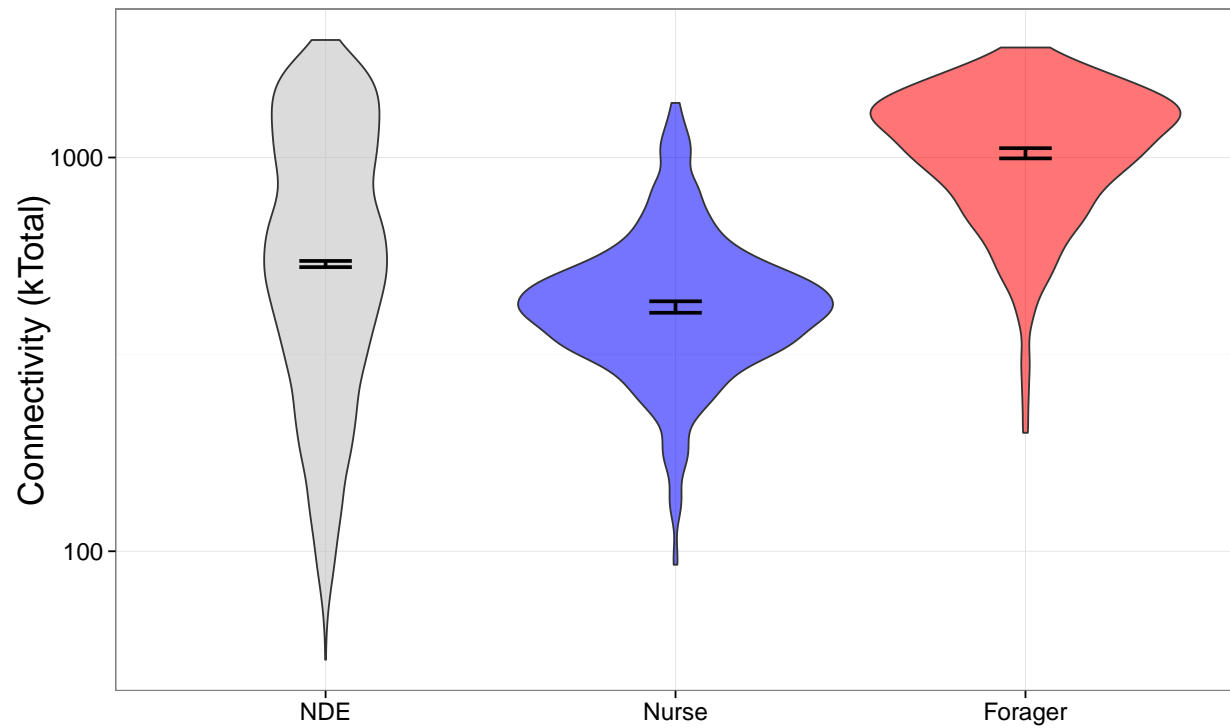

```
#evolutionary rate vs. behavioral category
rate_plot<-ggplot(connectivity_rate,aes(x=factor(task),y=rate,fill=task,alpha=0.2))+
  geom_violin()+theme_bw()+
  ylab("Evolutionary rate (dN/dS)")+xlab("")+
  scale_y_log10(labels=fmt(),limits=c(5e-3, 3))+
  scale_fill_manual(values=c("grey","blue","red"))+
  theme(legend.position="none")+theme(plot.margin=unit(c(0,0.5,0,0), "cm"),
  axis.text.y = element_text(size=14),axis.text.x = element_text(size=14),
  axis.title.y = element_text(size=20),axis.title.x = element_text(size=20))+
  stat_summary(fun.data="mean_cl_boot", geom="errorbar"
  ,width=0.15,alpha=1,size=1,colour = "black")
rate_plot
```

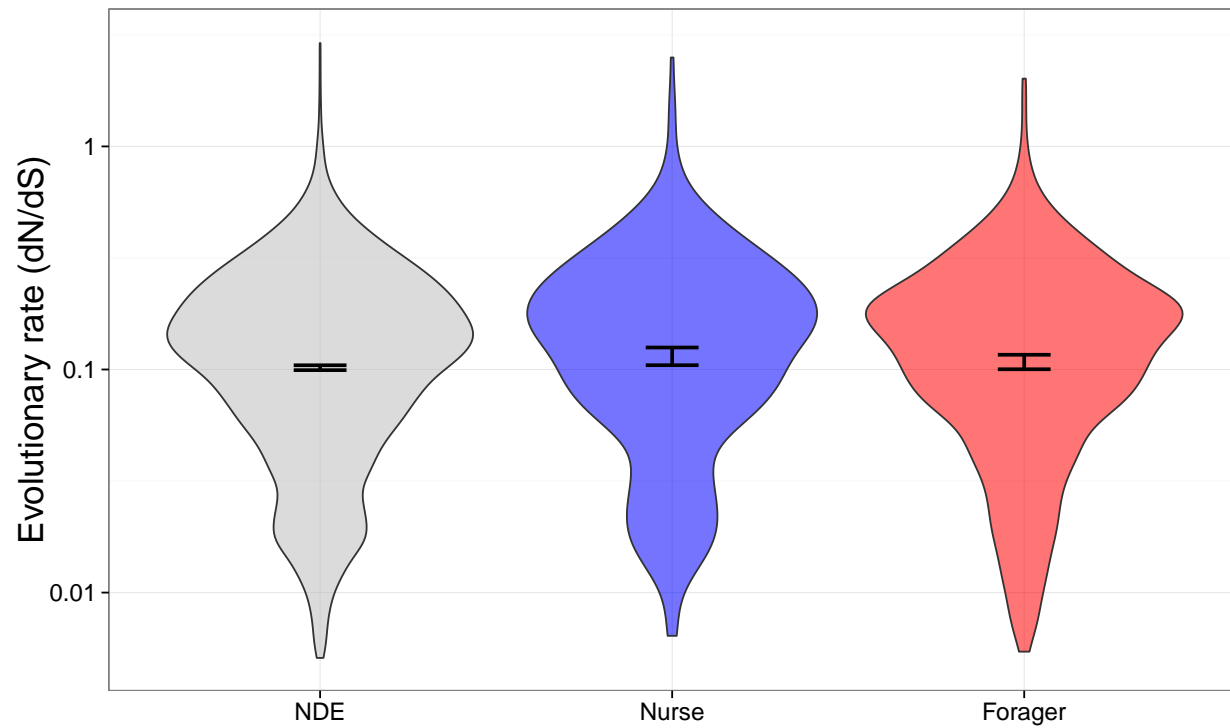

```
#expression vs. behavioral category
expression_plot<-ggplot(connectivity_rate,aes(x=factor(task),y=fpkm,fill=task,alpha=0.2))+
  geom_violin()+theme_bw()+
  ylab("Expression (FPKM)")+xlab("")+
  scale_y_log10(labels=fmt(),limits=c(1, 1e4))+
  scale_fill_manual(values=c("grey","blue","red"))+
  theme(legend.position="none")+theme(plot.margin=unit(c(0,0.5,0,0), "cm"),
  axis.text.y = element_text(size=14),axis.text.x = element_text(size=14),
  axis.title.y = element_text(size=20),axis.title.x = element_text(size=20))+
  stat_summary(fun.data="mean_cl_boot", geom="errorbar"
  ,width=0.15,alpha=1,size=1,colour = "black")
expression_plot
```

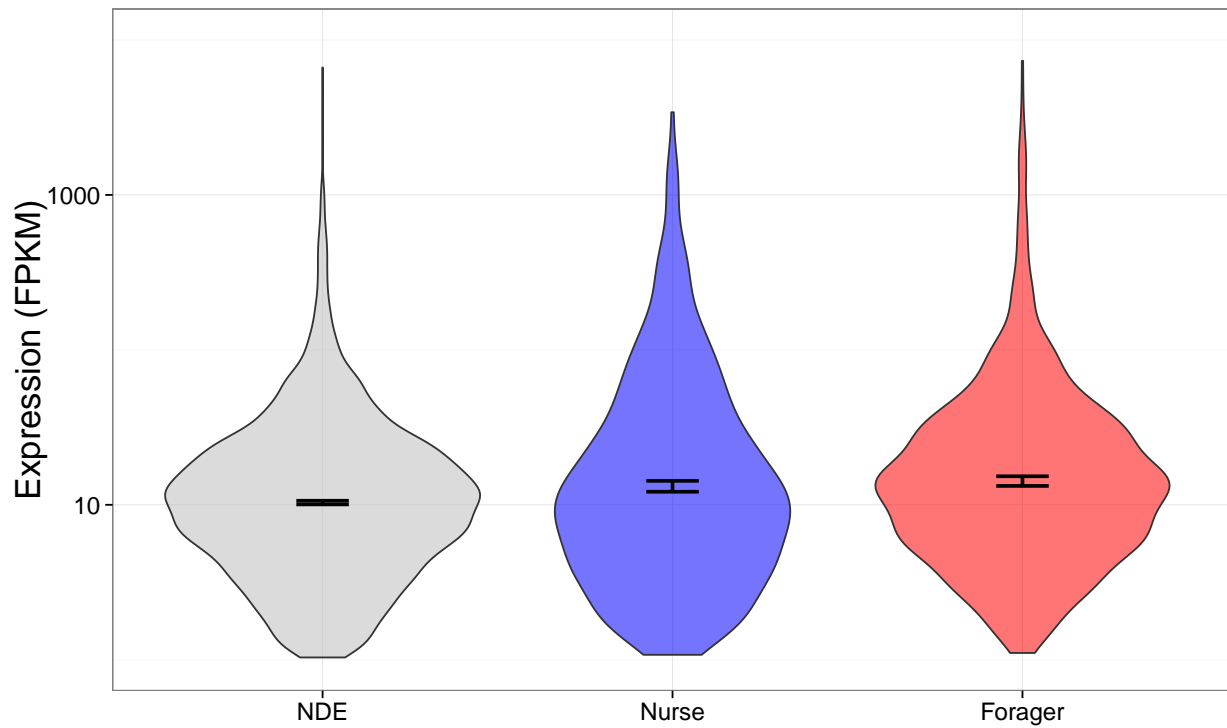

```
#fpkm vs connectivity
fpkm_connectivity_plot <- ggplot(connectivity_rate,aes(fpkm,kTotal,color=task))+
  geom_point(alpha=0.7)+scale_x_log10(limits=c(1, 1e4))+
  scale_y_log10(labels=fmt())+theme_bw()+
  ylab("Connectivity (kTotal)")+xlab("Expression (FPKM)")+
  stat_smooth(method="lm",se=FALSE,size=1.25,fullrange=TRUE,aes(group=task))+
  scale_color_manual(values=c("grey","blue","red"))+
  theme(legend.position="none")+theme(plot.margin=unit(c(0,0.5,0,0), "cm"),
  axis.text.y = element_text(size=14),axis.text.x = element_text(size=14),
  axis.title.y = element_text(size=20),axis.title.x = element_text(size=20))+
  ggtitle("")
fpkm_connectivity_plot
```

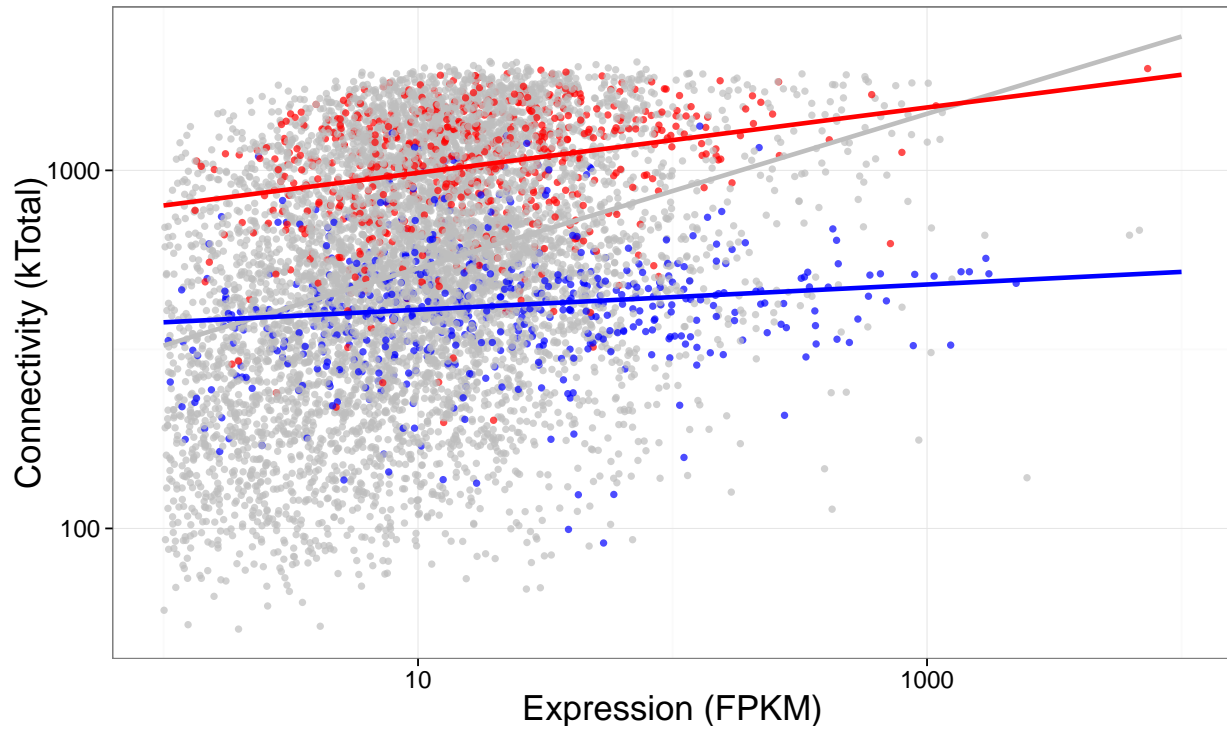

```
#rate and fpkm
rate_fpkm_plot <- ggplot(connectivity_rate,aes(fpkm,rate,color=task))+
  geom_point(alpha=0.7)+scale_x_log10(limits=c(1, 1e4))+
  scale_y_log10(labels=fmt(),limits=c(1e-3, 1))+theme_bw()+
  ylab("Evolutionary rate (dN/dS)")+xlab("Expression (FPKM)")+
  stat_smooth(method="lm",se=FALSE,size=1.25,fullrange=TRUE,aes(group=task))+
  scale_color_manual(values=c("grey","blue","red"))+
  theme(legend.position="none")+theme(plot.margin=unit(c(0,0.5,0,0), "cm"),
  axis.text.y = element_text(size=14),axis.text.x = element_text(size=14),
  axis.title.y = element_text(size=20),axis.title.x = element_text(size=20))+
  ggtitle("")
rate_fpkm_plot
```

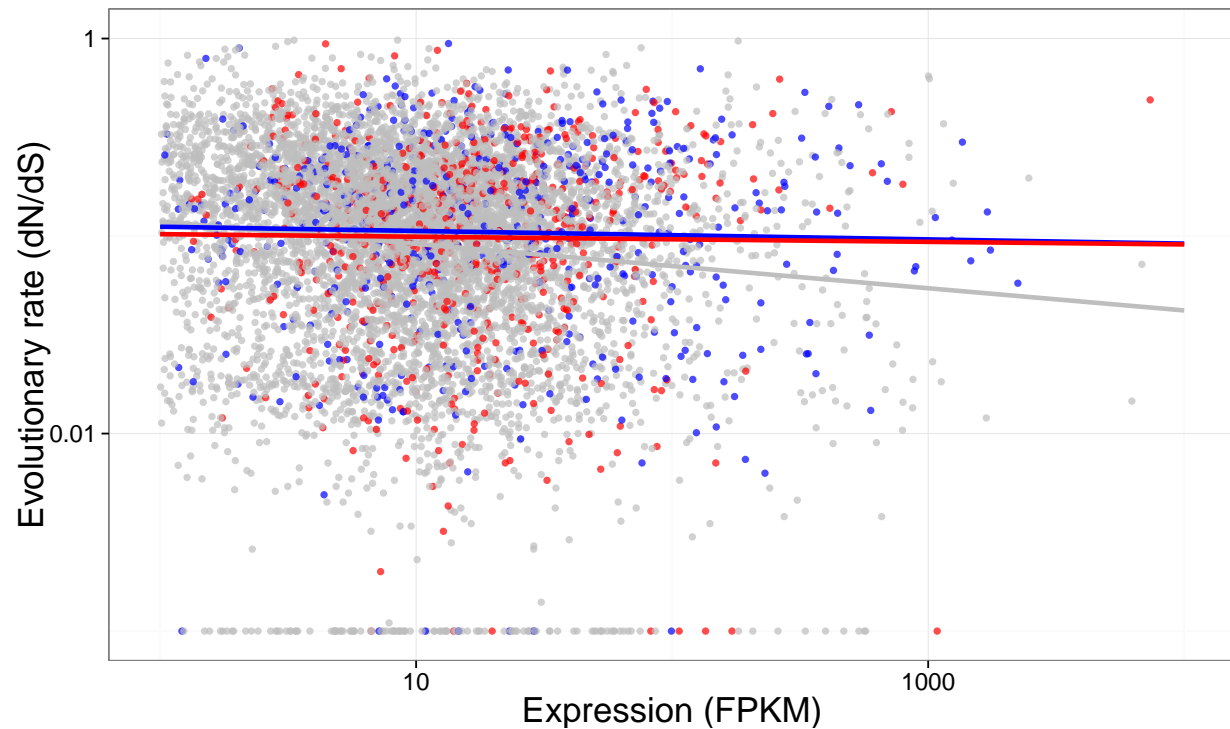

```
# evolutionary rates and connectivity
connectivity_rate_plot <- ggplot(connectivity_rate,aes(kTotal,rate,color=task))+
  geom_point(alpha=0.7)+scale_x_log10()+
  scale_y_log10(labels=fmt(),limits=c(1e-3, 1))+theme_bw()+
  ylab("Evolutionary rate (dN/dS)")+xlab("Connectivity (kTotal)")+
  stat_smooth(method="lm",se=FALSE,size=1.25,fullrange=TRUE,aes(group=task))+
  scale_color_manual(values=c("grey","blue","red"))+
  theme(legend.position="none")+theme(plot.margin=unit(c(0,0.5,0,0), "cm"),
  axis.text.y = element_text(size=14),axis.text.x = element_text(size=14),
  axis.title.y = element_text(size=20),axis.title.x = element_text(size=20))+
  ggtitle("")
connectivity_rate_plot
```

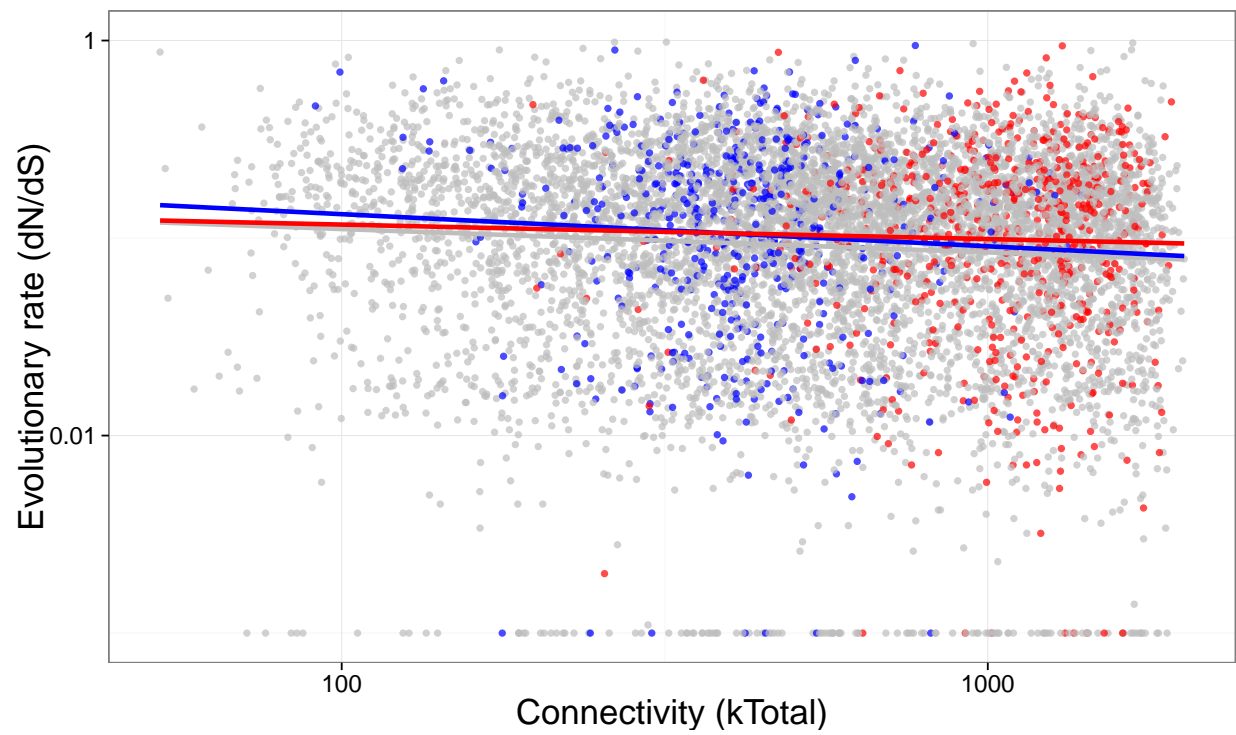

Supplement: supp [file elife-04775-supp-v1.zip › elife_poa_e04775_Supplementary_File_2.pdf]
