# Supplementary material for: Genes associated with ant social behavior show distinct transcriptional and evolutionary patterns
Source: eLife journal article supplement (doi:10.7554/elife.04775), 2015-01-26
Supplement: supp [file elife-04775-supp-v1.zip]

Archive with 9 entries (9 files):
- elife_poa_e04775_Figure_1_figure_supplement_1.pdf
- elife_poa_e04775_Figure_1_figure_supplement_2.pdf
- elife_poa_e04775_Supplementary_File_1.xlsx
- elife_poa_e04775_Supplementary_File_5_Source_R_Markdown_file_for_Supplementary_File_2.txt
- elife_poa_e04775_Supplementary_File_2.pdf
- elife_poa_e04775_Figure_1_figure_supplement_3.pdf
- elife_poa_e04775_Figure_3_figure_supplement_1.pdf
- elife_poa_e04775_Supplementary_File_3.csv
- elife_poa_e04775_Supplementary_File_4.csv
