# Supplementary material for: Genes associated with ant social behavior show distinct transcriptional and evolutionary patterns
Source: eLife journal article supplement (doi:10.7554/elife.04775), 2015-01-26
Supplement: supp [file elife-04775-supp-v1.zip › elife_poa_e04775_Supplementary_File_1.xlsx]

## Sheet: Sheet1
Supplemental Table 1. List of behaviors observed with behavioral code, name, description, the label for the behavior in the main text
and the total number of observations of the behavior
code	original name	description of behavior		label in text	Total observations
aa	antennating adult	marked worker female antennates another worker			435
ac	antennating callow	marked worker antennates callow			2
ag	allogrooming	marked worker grooms another worker			342
al	antennating larva	marked worker antennates larva			115
ap	antennating pupa	marked worker antennates pupa			45
aq	antennating queen	marked worker antennates queen			16
bc	being carried	marked worker is held in the jaws of another worker and translocated in the colony			4
bg	being groomed	marked worker is groomed by another worker			173
ca	carrying adult	marked worker holds another worker in its mandibles and translocates it in the colony			11
cc	carrying callow	marked worker holds a callow worker in its mandibles and translocates it in the colony			4
cd	carrying dead	marked worker holds a dead worker in its mandibles and translocates it in the colony			12
ce	carrying egg	marked worker holds an egg in its mandibles and translocatesit in the colony			17
cf	carrying food	marked worker holds piece of food in its mandibles and translocates it in the colony		forage	2
cl	carrying larva	marked worker holds a larva in its mandibles and translocates it in the colony			42
cp	carrying pupa	marked worker holds a pupa in its mandibles and translocates it in the colony			14
dy	dying	marked worker lying down and twitching			1
fl	feeding larva	marked worker locks mandibles with larva and transfers food via trophalaxis		nurse	33
gc	grooming callow	marked worker grooms callow worker			2
gl	grooming larva	marked worker grooms larva			42
gp	grooming pupa	marked worker grooms pupa			10
nm	not moving	marked worker remains stationary for more than 5 seconds			7
oh	on honey	marked worker foraging on honey		forage	3
ol	on liver	marked worker foraging on liver		forage	32
ow	on water	marker worker drinking water		forage	11
s	sleeping	marker worker curled up and not moving in the nest area		rest	1582
sg	self grooming	marked worker grooming itself			146
t	trophallaxis	marked worker transferring food via trophalaxis to another worker		trophallaxis	160
tq	queen trophallaxis	marked worker transferring food via trophalaxis to a queen			4
w	walking	marked worker walking		walk	839
z	larval anal trophallaxis	marked worker with mandibles open and maxilla extended to anus of 4th instar larva			23
