# Supplementary material for: Genes associated with ant social behavior show distinct transcriptional and evolutionary patterns
Source: eLife journal article supplement (doi:10.7554/elife.04775), 2015-01-26
Supplement: supp [file elife-04775-supp-v1.zip › elife_poa_e04775_Supplementary_File_3.csv]

GOBPID	Pvalue	OddsRatio	ExpCount	Count	Size	GOTerm	GeneCategory	Direction
GO:0034331	0.000325632	26.66257669	0.423257802	4	6	cell junction maintenance	forager_upregulated_genes	overrepresented
GO:0030048	0.001319287	39.88073394	0.282171868	3	4	actin filament-based movement	forager_upregulated_genes	overrepresented
GO:0035317	0.001453153	6.175213675	1.340316375	6	19	imaginal disc-derived wing hair organization	forager_upregulated_genes	overrepresented
GO:0035316	0.001954515	5.732804233	1.410859342	6	20	non-sensory hair organization	forager_upregulated_genes	overrepresented
GO:0006563	0.003125802	19.93577982	0.352714835	3	5	L-serine metabolic process	forager_upregulated_genes	overrepresented
GO:0065008	0.00324146	1.533359518	44.58315519	62	632	regulation of biological quality	forager_upregulated_genes	overrepresented
GO:0009966	0.003445735	2.041302235	11.92176144	22	169	regulation of signal transduction	forager_upregulated_genes	overrepresented
GO:0046664	0.003630391	8.879345603	0.705429671	4	10	dorsal closure, amnioserosa morphology change	forager_upregulated_genes	overrepresented
GO:0043954	0.003630391	8.879345603	0.705429671	4	10	cellular component maintenance	forager_upregulated_genes	overrepresented
GO:0048583	0.003728941	1.931555062	14.24967935	25	202	regulation of response to stimulus	forager_upregulated_genes	overrepresented
GO:0035315	0.004250615	4.717864924	1.622488243	6	23	hair cell differentiation	forager_upregulated_genes	overrepresented
GO:0006564	0.004962291	Inf	0.141085934	2	2	L-serine biosynthetic process	forager_upregulated_genes	overrepresented
GO:0009082	0.004962291	Inf	0.141085934	2	2	branched-chain amino acid biosynthetic process	forager_upregulated_genes	overrepresented
GO:0018202	0.004962291	Inf	0.141085934	2	2	peptidyl-histidine modification	forager_upregulated_genes	overrepresented
GO:0045217	0.004962291	Inf	0.141085934	2	2	cell-cell junction maintenance	forager_upregulated_genes	overrepresented
GO:0042436	0.004962291	Inf	0.141085934	2	2	indole-containing compound catabolic process	forager_upregulated_genes	overrepresented
GO:0042816	0.004962291	Inf	0.141085934	2	2	vitamin B6 metabolic process	forager_upregulated_genes	overrepresented
GO:0071702	0.005690663	1.773789748	17.84737067	29	253	organic substance transport	forager_upregulated_genes	overrepresented
GO:0007169	0.005820872	2.859707447	4.020949124	10	57	transmembrane receptor protein tyrosine kinase signaling pathway	forager_upregulated_genes	overrepresented
GO:0048747	0.005925972	13.28746177	0.423257802	3	6	muscle fiber development	forager_upregulated_genes	overrepresented
GO:0055001	0.00661565	4.219298246	1.763574177	6	25	muscle cell development	forager_upregulated_genes	overrepresented
GO:0055002	0.00661565	4.219298246	1.763574177	6	25	striated muscle cell development	forager_upregulated_genes	overrepresented
GO:0009913	0.008101648	4.007407407	1.834117144	6	26	epidermal cell differentiation	forager_upregulated_genes	overrepresented
GO:0045216	0.008345308	3.46829492	2.398460881	7	34	cell-cell junction organization	forager_upregulated_genes	overrepresented
GO:0007391	0.009460131	2.632965686	4.303120992	10	61	dorsal closure	forager_upregulated_genes	overrepresented
GO:0023051	0.00949771	1.81895311	13.75587858	23	195	regulation of signaling	forager_upregulated_genes	overrepresented
GO:0035966	0.009832245	9.963302752	0.49380077	3	7	response to topologically incorrect protein	forager_upregulated_genes	overrepresented
GO:0006986	0.009832245	9.963302752	0.49380077	3	7	response to unfolded protein	forager_upregulated_genes	overrepresented
GO:0010646	0.010081236	1.808005874	13.82642155	23	196	regulation of cell communication	forager_upregulated_genes	overrepresented
GO:0065007	0.01038578	1.315350271	125.7075673	146	1782	biological regulation	forager_upregulated_genes	overrepresented
GO:0009072	0.010435687	5.915473756	0.917058572	4	13	aromatic amino acid family metabolic process	forager_upregulated_genes	overrepresented
GO:0030855	0.010616998	2.975845411	3.103890552	8	44	epithelial cell differentiation	forager_upregulated_genes	overrepresented
GO:0034330	0.011470983	3.227607558	2.539546815	7	36	cell junction organization	forager_upregulated_genes	overrepresented
GO:0007476	0.012597797	2.120110937	7.265925609	14	103	imaginal disc-derived wing morphogenesis	forager_upregulated_genes	overrepresented
GO:0048193	0.013460392	4.165384615	1.481402309	5	21	Golgi vesicle transport	forager_upregulated_genes	overrepresented
GO:0007472	0.013657658	2.096061885	7.336468576	14	104	wing disc morphogenesis	forager_upregulated_genes	overrepresented
GO:0009310	0.01419071	26.50609756	0.211628901	2	3	amine catabolic process	forager_upregulated_genes	overrepresented
GO:0042402	0.01419071	26.50609756	0.211628901	2	3	cellular biogenic amine catabolic process	forager_upregulated_genes	overrepresented
GO:0048737	0.015458978	2.002357379	8.182984181	15	116	imaginal disc-derived appendage development	forager_upregulated_genes	overrepresented
GO:0045184	0.015479716	1.805591398	11.9923044	20	170	establishment of protein localization	forager_upregulated_genes	overrepresented
GO:0008544	0.016469249	3.336419753	2.116289012	6	30	epidermis development	forager_upregulated_genes	overrepresented
GO:0048736	0.018288721	1.909700693	9.100042753	16	129	appendage development	forager_upregulated_genes	overrepresented
GO:0035120	0.018601157	2.004982494	7.618640445	14	108	post-embryonic appendage morphogenesis	forager_upregulated_genes	overrepresented
GO:0051146	0.019246911	3.202222222	2.186831979	6	31	striated muscle cell differentiation	forager_upregulated_genes	overrepresented
GO:0007435	0.019246911	3.202222222	2.186831979	6	31	salivary gland morphogenesis	forager_upregulated_genes	overrepresented
GO:0002168	0.019246911	3.202222222	2.186831979	6	31	instar larval development	forager_upregulated_genes	overrepresented
GO:0043588	0.019246911	3.202222222	2.186831979	6	31	skin development	forager_upregulated_genes	overrepresented
GO:0016331	0.019661096	2.121151936	6.207781103	12	88	morphogenesis of embryonic epithelium	forager_upregulated_genes	overrepresented
GO:0045454	0.01982356	3.700854701	1.622488243	5	23	cell redox homeostasis	forager_upregulated_genes	overrepresented
GO:0035556	0.020656984	1.676403629	14.74348012	23	209	intracellular signal transduction	forager_upregulated_genes	overrepresented
GO:0015031	0.020920699	1.770861515	11.5690466	19	164	protein transport	forager_upregulated_genes	overrepresented
GO:0008104	0.020977217	1.620292129	17.21248397	26	244	protein localization	forager_upregulated_genes	overrepresented
GO:0006997	0.021224588	6.639143731	0.634886704	3	9	nucleus organization	forager_upregulated_genes	overrepresented
GO:0009081	0.021224588	6.639143731	0.634886704	3	9	branched-chain amino acid metabolic process	forager_upregulated_genes	overrepresented
GO:0014902	0.021224588	6.639143731	0.634886704	3	9	myotube differentiation	forager_upregulated_genes	overrepresented
GO:0009306	0.021224588	6.639143731	0.634886704	3	9	protein secretion	forager_upregulated_genes	overrepresented
GO:0001700	0.021672737	2.170385396	5.572894399	11	79	embryonic development via the syncytial blastoderm	forager_upregulated_genes	overrepresented
GO:0007167	0.021672737	2.170385396	5.572894399	11	79	enzyme linked receptor protein signaling pathway	forager_upregulated_genes	overrepresented
GO:0033036	0.02181591	1.559541985	20.59854639	30	292	macromolecule localization	forager_upregulated_genes	overrepresented
GO:0007552	0.022398854	1.819919874	10.08764429	17	143	metamorphosis	forager_upregulated_genes	overrepresented
GO:0035162	0.022457263	4.433537832	1.128687473	4	16	embryonic hemopoiesis	forager_upregulated_genes	overrepresented
GO:0042180	0.022457263	4.433537832	1.128687473	4	16	cellular ketone metabolic process	forager_upregulated_genes	overrepresented
GO:0030029	0.023567022	1.887405429	8.606241984	15	122	actin filament-based process	forager_upregulated_genes	overrepresented
GO:1902531	0.024133077	1.985230857	7.124839675	13	101	regulation of intracellular signal transduction	forager_upregulated_genes	overrepresented
GO:0035107	0.026878083	1.851900393	8.747327918	15	124	appendage morphogenesis	forager_upregulated_genes	overrepresented
GO:0048569	0.026960805	1.810844083	9.523300556	16	135	post-embryonic organ development	forager_upregulated_genes	overrepresented
GO:0006890	0.027062133	13.25	0.282171868	2	4	retrograde vesicle-mediated transport, Golgi to ER	forager_upregulated_genes	overrepresented
GO:0046425	0.027062133	13.25	0.282171868	2	4	regulation of JAK-STAT cascade	forager_upregulated_genes	overrepresented
GO:0034334	0.027062133	13.25	0.282171868	2	4	adherens junction maintenance	forager_upregulated_genes	overrepresented
GO:0009074	0.027062133	13.25	0.282171868	2	4	aromatic amino acid family catabolic process	forager_upregulated_genes	overrepresented
GO:0072337	0.027062133	13.25	0.282171868	2	4	modified amino acid transport	forager_upregulated_genes	overrepresented
GO:0042332	0.027062133	13.25	0.282171868	2	4	gravitaxis	forager_upregulated_genes	overrepresented
GO:0050877	0.027893888	1.940203295	7.265925609	13	103	neurological system process	forager_upregulated_genes	overrepresented
GO:0035114	0.028421155	1.882025316	8.041898247	14	114	imaginal disc-derived appendage morphogenesis	forager_upregulated_genes	overrepresented
GO:0035099	0.028764959	5.68938401	0.705429671	3	10	hemocyte migration	forager_upregulated_genes	overrepresented
GO:0002165	0.029777265	1.721358429	11.21633177	18	159	instar larval or pupal development	forager_upregulated_genes	overrepresented
GO:0046907	0.031552045	1.616459627	14.53185122	22	206	intracellular transport	forager_upregulated_genes	overrepresented
GO:0015711	0.032527937	2.525060664	3.103890552	7	44	organic anion transport	forager_upregulated_genes	overrepresented
GO:0022612	0.033510403	2.75798212	2.469003848	6	35	gland morphogenesis	forager_upregulated_genes	overrepresented
GO:0009850	0.03562886	1.49646931	20.59854639	29	292	auxin metabolic process	forager_upregulated_genes	overrepresented
GO:0009851	0.03562886	1.49646931	20.59854639	29	292	auxin biosynthetic process	forager_upregulated_genes	overrepresented
GO:0007611	0.036282828	2.458041388	3.174433519	7	45	learning or memory	forager_upregulated_genes	overrepresented
GO:0001654	0.036656744	1.768588137	9.100042753	15	129	eye development	forager_upregulated_genes	overrepresented
GO:0009888	0.037257321	1.511905736	18.97605814	27	269	tissue development	forager_upregulated_genes	overrepresented
GO:0007431	0.037918287	2.665432099	2.539546815	6	36	salivary gland development	forager_upregulated_genes	overrepresented
GO:0016310	0.038264904	1.475362319	21.58614793	30	306	phosphorylation	forager_upregulated_genes	overrepresented
GO:0048707	0.03839455	1.721477707	9.946558358	16	141	instar larval or pupal morphogenesis	forager_upregulated_genes	overrepresented
GO:0048563	0.038886672	1.752795031	9.17058572	15	130	post-embryonic organ morphogenesis	forager_upregulated_genes	overrepresented
GO:0007560	0.038886672	1.752795031	9.17058572	15	130	imaginal disc morphogenesis	forager_upregulated_genes	overrepresented
GO:0042446	0.03999534	1.478505233	20.81017529	29	295	hormone biosynthetic process	forager_upregulated_genes	overrepresented
GO:0050890	0.040313341	2.394458998	3.244976486	7	46	cognition	forager_upregulated_genes	overrepresented
GO:0002164	0.040313341	2.394458998	3.244976486	7	46	larval development	forager_upregulated_genes	overrepresented
GO:0034332	0.040490473	3.544376278	1.340316375	4	19	adherens junction organization	forager_upregulated_genes	overrepresented
GO:0009886	0.040597621	1.707410777	10.01710133	16	142	post-embryonic morphogenesis	forager_upregulated_genes	overrepresented
GO:0009791	0.040639011	1.605222734	13.26207781	20	188	post-embryonic development	forager_upregulated_genes	overrepresented
GO:0042692	0.042679839	2.578853047	2.610089782	6	37	muscle cell differentiation	forager_upregulated_genes	overrepresented
GO:0006767	0.043019686	8.831300813	0.352714835	2	5	water-soluble vitamin metabolic process	forager_upregulated_genes	overrepresented
GO:0009070	0.043019686	8.831300813	0.352714835	2	5	serine family amino acid biosynthetic process	forager_upregulated_genes	overrepresented
GO:0007259	0.043019686	8.831300813	0.352714835	2	5	JAK-STAT cascade	forager_upregulated_genes	overrepresented
GO:0042430	0.043019686	8.831300813	0.352714835	2	5	indole-containing compound metabolic process	forager_upregulated_genes	overrepresented
GO:0009629	0.043019686	8.831300813	0.352714835	2	5	response to gravity	forager_upregulated_genes	overrepresented
GO:0042335	0.043436689	2.892976589	1.975203078	5	28	cuticle development	forager_upregulated_genes	overrepresented
GO:0000910	0.043436689	2.892976589	1.975203078	5	28	cytokinesis	forager_upregulated_genes	overrepresented
GO:0035220	0.043636515	1.722018722	9.311671655	15	132	wing disc development	forager_upregulated_genes	overrepresented
GO:0006820	0.044835701	2.179743947	4.020949124	8	57	anion transport	forager_upregulated_genes	overrepresented
GO:0003008	0.045274468	1.679936306	10.15818726	16	144	system process	forager_upregulated_genes	overrepresented
GO:0010817	0.045991608	1.447330961	21.93886276	30	311	regulation of hormone levels	forager_upregulated_genes	overrepresented
GO:0048749	0.047345995	1.826758148	7.054296708	12	100	compound eye development	forager_upregulated_genes	overrepresented
GO:0009069	0.047492549	4.423037717	0.846515605	3	12	serine family amino acid metabolic process	forager_upregulated_genes	overrepresented
GO:0007392	0.047492549	4.423037717	0.846515605	3	12	initiation of dorsal closure	forager_upregulated_genes	overrepresented
GO:0072524	0.047492549	4.423037717	0.846515605	3	12	pyridine-containing compound metabolic process	forager_upregulated_genes	overrepresented
GO:0048732	0.047718101	2.038175194	4.796921761	9	68	gland development	forager_upregulated_genes	overrepresented
GO:0035272	0.047801026	2.497685185	2.680632749	6	38	exocrine system development	forager_upregulated_genes	overrepresented
GO:0045995	0.047895844	3.32208589	1.410859342	4	20	regulation of embryonic development	forager_upregulated_genes	overrepresented
GO:0008105	0.049573272	2.771794872	2.045746045	5	29	asymmetric protein localization	forager_upregulated_genes	overrepresented
GO:0034331	0.000325632	26.66257669	0.423257802	4	6	cell junction maintenance	forager_upregulated_genes	underrepresented
GO:0030048	0.001319287	39.88073394	0.282171868	3	4	actin filament-based movement	forager_upregulated_genes	underrepresented
GO:0035317	0.001453153	6.175213675	1.340316375	6	19	imaginal disc-derived wing hair organization	forager_upregulated_genes	underrepresented
GO:0035316	0.001954515	5.732804233	1.410859342	6	20	non-sensory hair organization	forager_upregulated_genes	underrepresented
GO:0006563	0.003125802	19.93577982	0.352714835	3	5	L-serine metabolic process	forager_upregulated_genes	underrepresented
GO:0065008	0.00324146	1.533359518	44.58315519	62	632	regulation of biological quality	forager_upregulated_genes	underrepresented
GO:0009966	0.003445735	2.041302235	11.92176144	22	169	regulation of signal transduction	forager_upregulated_genes	underrepresented
GO:0046664	0.003630391	8.879345603	0.705429671	4	10	dorsal closure, amnioserosa morphology change	forager_upregulated_genes	underrepresented
GO:0043954	0.003630391	8.879345603	0.705429671	4	10	cellular component maintenance	forager_upregulated_genes	underrepresented
GO:0048583	0.003728941	1.931555062	14.24967935	25	202	regulation of response to stimulus	forager_upregulated_genes	underrepresented
GO:0035315	0.004250615	4.717864924	1.622488243	6	23	hair cell differentiation	forager_upregulated_genes	underrepresented
GO:0006564	0.004962291	Inf	0.141085934	2	2	L-serine biosynthetic process	forager_upregulated_genes	underrepresented
GO:0009082	0.004962291	Inf	0.141085934	2	2	branched-chain amino acid biosynthetic process	forager_upregulated_genes	underrepresented
GO:0018202	0.004962291	Inf	0.141085934	2	2	peptidyl-histidine modification	forager_upregulated_genes	underrepresented
GO:0045217	0.004962291	Inf	0.141085934	2	2	cell-cell junction maintenance	forager_upregulated_genes	underrepresented
GO:0042436	0.004962291	Inf	0.141085934	2	2	indole-containing compound catabolic process	forager_upregulated_genes	underrepresented
GO:0042816	0.004962291	Inf	0.141085934	2	2	vitamin B6 metabolic process	forager_upregulated_genes	underrepresented
GO:0071702	0.005690663	1.773789748	17.84737067	29	253	organic substance transport	forager_upregulated_genes	underrepresented
GO:0007169	0.005820872	2.859707447	4.020949124	10	57	transmembrane receptor protein tyrosine kinase signaling pathway	forager_upregulated_genes	underrepresented
GO:0048747	0.005925972	13.28746177	0.423257802	3	6	muscle fiber development	forager_upregulated_genes	underrepresented
GO:0055001	0.00661565	4.219298246	1.763574177	6	25	muscle cell development	forager_upregulated_genes	underrepresented
GO:0055002	0.00661565	4.219298246	1.763574177	6	25	striated muscle cell development	forager_upregulated_genes	underrepresented
GO:0009913	0.008101648	4.007407407	1.834117144	6	26	epidermal cell differentiation	forager_upregulated_genes	underrepresented
GO:0045216	0.008345308	3.46829492	2.398460881	7	34	cell-cell junction organization	forager_upregulated_genes	underrepresented
GO:0007391	0.009460131	2.632965686	4.303120992	10	61	dorsal closure	forager_upregulated_genes	underrepresented
GO:0023051	0.00949771	1.81895311	13.75587858	23	195	regulation of signaling	forager_upregulated_genes	underrepresented
GO:0035966	0.009832245	9.963302752	0.49380077	3	7	response to topologically incorrect protein	forager_upregulated_genes	underrepresented
GO:0006986	0.009832245	9.963302752	0.49380077	3	7	response to unfolded protein	forager_upregulated_genes	underrepresented
GO:0010646	0.010081236	1.808005874	13.82642155	23	196	regulation of cell communication	forager_upregulated_genes	underrepresented
GO:0065007	0.01038578	1.315350271	125.7075673	146	1782	biological regulation	forager_upregulated_genes	underrepresented
GO:0009072	0.010435687	5.915473756	0.917058572	4	13	aromatic amino acid family metabolic process	forager_upregulated_genes	underrepresented
GO:0030855	0.010616998	2.975845411	3.103890552	8	44	epithelial cell differentiation	forager_upregulated_genes	underrepresented
GO:0034330	0.011470983	3.227607558	2.539546815	7	36	cell junction organization	forager_upregulated_genes	underrepresented
GO:0007476	0.012597797	2.120110937	7.265925609	14	103	imaginal disc-derived wing morphogenesis	forager_upregulated_genes	underrepresented
GO:0048193	0.013460392	4.165384615	1.481402309	5	21	Golgi vesicle transport	forager_upregulated_genes	underrepresented
GO:0007472	0.013657658	2.096061885	7.336468576	14	104	wing disc morphogenesis	forager_upregulated_genes	underrepresented
GO:0009310	0.01419071	26.50609756	0.211628901	2	3	amine catabolic process	forager_upregulated_genes	underrepresented
GO:0042402	0.01419071	26.50609756	0.211628901	2	3	cellular biogenic amine catabolic process	forager_upregulated_genes	underrepresented
GO:0048737	0.015458978	2.002357379	8.182984181	15	116	imaginal disc-derived appendage development	forager_upregulated_genes	underrepresented
GO:0045184	0.015479716	1.805591398	11.9923044	20	170	establishment of protein localization	forager_upregulated_genes	underrepresented
GO:0008544	0.016469249	3.336419753	2.116289012	6	30	epidermis development	forager_upregulated_genes	underrepresented
GO:0048736	0.018288721	1.909700693	9.100042753	16	129	appendage development	forager_upregulated_genes	underrepresented
GO:0035120	0.018601157	2.004982494	7.618640445	14	108	post-embryonic appendage morphogenesis	forager_upregulated_genes	underrepresented
GO:0051146	0.019246911	3.202222222	2.186831979	6	31	striated muscle cell differentiation	forager_upregulated_genes	underrepresented
GO:0007435	0.019246911	3.202222222	2.186831979	6	31	salivary gland morphogenesis	forager_upregulated_genes	underrepresented
GO:0002168	0.019246911	3.202222222	2.186831979	6	31	instar larval development	forager_upregulated_genes	underrepresented
GO:0043588	0.019246911	3.202222222	2.186831979	6	31	skin development	forager_upregulated_genes	underrepresented
GO:0016331	0.019661096	2.121151936	6.207781103	12	88	morphogenesis of embryonic epithelium	forager_upregulated_genes	underrepresented
GO:0045454	0.01982356	3.700854701	1.622488243	5	23	cell redox homeostasis	forager_upregulated_genes	underrepresented
GO:0035556	0.020656984	1.676403629	14.74348012	23	209	intracellular signal transduction	forager_upregulated_genes	underrepresented
GO:0015031	0.020920699	1.770861515	11.5690466	19	164	protein transport	forager_upregulated_genes	underrepresented
GO:0008104	0.020977217	1.620292129	17.21248397	26	244	protein localization	forager_upregulated_genes	underrepresented
GO:0006997	0.021224588	6.639143731	0.634886704	3	9	nucleus organization	forager_upregulated_genes	underrepresented
GO:0009081	0.021224588	6.639143731	0.634886704	3	9	branched-chain amino acid metabolic process	forager_upregulated_genes	underrepresented
GO:0014902	0.021224588	6.639143731	0.634886704	3	9	myotube differentiation	forager_upregulated_genes	underrepresented
GO:0009306	0.021224588	6.639143731	0.634886704	3	9	protein secretion	forager_upregulated_genes	underrepresented
GO:0001700	0.021672737	2.170385396	5.572894399	11	79	embryonic development via the syncytial blastoderm	forager_upregulated_genes	underrepresented
GO:0007167	0.021672737	2.170385396	5.572894399	11	79	enzyme linked receptor protein signaling pathway	forager_upregulated_genes	underrepresented
GO:0033036	0.02181591	1.559541985	20.59854639	30	292	macromolecule localization	forager_upregulated_genes	underrepresented
GO:0007552	0.022398854	1.819919874	10.08764429	17	143	metamorphosis	forager_upregulated_genes	underrepresented
GO:0035162	0.022457263	4.433537832	1.128687473	4	16	embryonic hemopoiesis	forager_upregulated_genes	underrepresented
GO:0042180	0.022457263	4.433537832	1.128687473	4	16	cellular ketone metabolic process	forager_upregulated_genes	underrepresented
GO:0030029	0.023567022	1.887405429	8.606241984	15	122	actin filament-based process	forager_upregulated_genes	underrepresented
GO:1902531	0.024133077	1.985230857	7.124839675	13	101	regulation of intracellular signal transduction	forager_upregulated_genes	underrepresented
GO:0035107	0.026878083	1.851900393	8.747327918	15	124	appendage morphogenesis	forager_upregulated_genes	underrepresented
GO:0048569	0.026960805	1.810844083	9.523300556	16	135	post-embryonic organ development	forager_upregulated_genes	underrepresented
GO:0006890	0.027062133	13.25	0.282171868	2	4	retrograde vesicle-mediated transport, Golgi to ER	forager_upregulated_genes	underrepresented
GO:0046425	0.027062133	13.25	0.282171868	2	4	regulation of JAK-STAT cascade	forager_upregulated_genes	underrepresented
GO:0034334	0.027062133	13.25	0.282171868	2	4	adherens junction maintenance	forager_upregulated_genes	underrepresented
GO:0009074	0.027062133	13.25	0.282171868	2	4	aromatic amino acid family catabolic process	forager_upregulated_genes	underrepresented
GO:0072337	0.027062133	13.25	0.282171868	2	4	modified amino acid transport	forager_upregulated_genes	underrepresented
GO:0042332	0.027062133	13.25	0.282171868	2	4	gravitaxis	forager_upregulated_genes	underrepresented
GO:0050877	0.027893888	1.940203295	7.265925609	13	103	neurological system process	forager_upregulated_genes	underrepresented
GO:0035114	0.028421155	1.882025316	8.041898247	14	114	imaginal disc-derived appendage morphogenesis	forager_upregulated_genes	underrepresented
GO:0035099	0.028764959	5.68938401	0.705429671	3	10	hemocyte migration	forager_upregulated_genes	underrepresented
GO:0002165	0.029777265	1.721358429	11.21633177	18	159	instar larval or pupal development	forager_upregulated_genes	underrepresented
GO:0046907	0.031552045	1.616459627	14.53185122	22	206	intracellular transport	forager_upregulated_genes	underrepresented
GO:0015711	0.032527937	2.525060664	3.103890552	7	44	organic anion transport	forager_upregulated_genes	underrepresented
GO:0022612	0.033510403	2.75798212	2.469003848	6	35	gland morphogenesis	forager_upregulated_genes	underrepresented
GO:0009850	0.03562886	1.49646931	20.59854639	29	292	auxin metabolic process	forager_upregulated_genes	underrepresented
GO:0009851	0.03562886	1.49646931	20.59854639	29	292	auxin biosynthetic process	forager_upregulated_genes	underrepresented
GO:0007611	0.036282828	2.458041388	3.174433519	7	45	learning or memory	forager_upregulated_genes	underrepresented
GO:0001654	0.036656744	1.768588137	9.100042753	15	129	eye development	forager_upregulated_genes	underrepresented
GO:0009888	0.037257321	1.511905736	18.97605814	27	269	tissue development	forager_upregulated_genes	underrepresented
GO:0007431	0.037918287	2.665432099	2.539546815	6	36	salivary gland development	forager_upregulated_genes	underrepresented
GO:0016310	0.038264904	1.475362319	21.58614793	30	306	phosphorylation	forager_upregulated_genes	underrepresented
GO:0048707	0.03839455	1.721477707	9.946558358	16	141	instar larval or pupal morphogenesis	forager_upregulated_genes	underrepresented
GO:0048563	0.038886672	1.752795031	9.17058572	15	130	post-embryonic organ morphogenesis	forager_upregulated_genes	underrepresented
GO:0007560	0.038886672	1.752795031	9.17058572	15	130	imaginal disc morphogenesis	forager_upregulated_genes	underrepresented
GO:0042446	0.03999534	1.478505233	20.81017529	29	295	hormone biosynthetic process	forager_upregulated_genes	underrepresented
GO:0050890	0.040313341	2.394458998	3.244976486	7	46	cognition	forager_upregulated_genes	underrepresented
GO:0002164	0.040313341	2.394458998	3.244976486	7	46	larval development	forager_upregulated_genes	underrepresented
GO:0034332	0.040490473	3.544376278	1.340316375	4	19	adherens junction organization	forager_upregulated_genes	underrepresented
GO:0009886	0.040597621	1.707410777	10.01710133	16	142	post-embryonic morphogenesis	forager_upregulated_genes	underrepresented
GO:0009791	0.040639011	1.605222734	13.26207781	20	188	post-embryonic development	forager_upregulated_genes	underrepresented
GO:0042692	0.042679839	2.578853047	2.610089782	6	37	muscle cell differentiation	forager_upregulated_genes	underrepresented
GO:0006767	0.043019686	8.831300813	0.352714835	2	5	water-soluble vitamin metabolic process	forager_upregulated_genes	underrepresented
GO:0009070	0.043019686	8.831300813	0.352714835	2	5	serine family amino acid biosynthetic process	forager_upregulated_genes	underrepresented
GO:0007259	0.043019686	8.831300813	0.352714835	2	5	JAK-STAT cascade	forager_upregulated_genes	underrepresented
GO:0042430	0.043019686	8.831300813	0.352714835	2	5	indole-containing compound metabolic process	forager_upregulated_genes	underrepresented
GO:0009629	0.043019686	8.831300813	0.352714835	2	5	response to gravity	forager_upregulated_genes	underrepresented
GO:0042335	0.043436689	2.892976589	1.975203078	5	28	cuticle development	forager_upregulated_genes	underrepresented
GO:0000910	0.043436689	2.892976589	1.975203078	5	28	cytokinesis	forager_upregulated_genes	underrepresented
GO:0035220	0.043636515	1.722018722	9.311671655	15	132	wing disc development	forager_upregulated_genes	underrepresented
GO:0006820	0.044835701	2.179743947	4.020949124	8	57	anion transport	forager_upregulated_genes	underrepresented
GO:0003008	0.045274468	1.679936306	10.15818726	16	144	system process	forager_upregulated_genes	underrepresented
GO:0010817	0.045991608	1.447330961	21.93886276	30	311	regulation of hormone levels	forager_upregulated_genes	underrepresented
GO:0048749	0.047345995	1.826758148	7.054296708	12	100	compound eye development	forager_upregulated_genes	underrepresented
GO:0009069	0.047492549	4.423037717	0.846515605	3	12	serine family amino acid metabolic process	forager_upregulated_genes	underrepresented
GO:0007392	0.047492549	4.423037717	0.846515605	3	12	initiation of dorsal closure	forager_upregulated_genes	underrepresented
GO:0072524	0.047492549	4.423037717	0.846515605	3	12	pyridine-containing compound metabolic process	forager_upregulated_genes	underrepresented
GO:0048732	0.047718101	2.038175194	4.796921761	9	68	gland development	forager_upregulated_genes	underrepresented
GO:0035272	0.047801026	2.497685185	2.680632749	6	38	exocrine system development	forager_upregulated_genes	underrepresented
GO:0045995	0.047895844	3.32208589	1.410859342	4	20	regulation of embryonic development	forager_upregulated_genes	underrepresented
GO:0008105	0.049573272	2.771794872	2.045746045	5	29	asymmetric protein localization	forager_upregulated_genes	underrepresented
GO:0006091	9.81E-25	12.79333382	6.283026935	41	88	generation of precursor metabolites and energy	nurse_upregulated_genes	overrepresented
GO:0045333	2.71E-21	31.86966755	2.570329201	25	36	cellular respiration	nurse_upregulated_genes	overrepresented
GO:0015980	2.66E-20	18.83660131	3.498503634	28	49	energy derivation by oxidation of organic compounds	nurse_upregulated_genes	overrepresented
GO:0055114	8.56E-18	4.659180236	18.2064985	60	255	oxidation-reduction process	nurse_upregulated_genes	overrepresented
GO:0006099	1.41E-14	51.01880878	1.356562634	15	19	tricarboxylic acid cycle	nurse_upregulated_genes	overrepresented
GO:0009060	1.63E-14	36.37735849	1.570756734	16	22	aerobic respiration	nurse_upregulated_genes	overrepresented
GO:0006119	7.14E-10	44.66049383	0.928174434	10	13	oxidative phosphorylation	nurse_upregulated_genes	overrepresented
GO:0022900	1.21E-09	15.95270462	1.7135528	13	24	electron transport chain	nurse_upregulated_genes	overrepresented
GO:0015992	1.99E-09	12.62625	2.070542967	14	29	proton transport	nurse_upregulated_genes	overrepresented
GO:0044710	2.37E-09	2.114149097	68.47071398	113	959	single-organism metabolic process	nurse_upregulated_genes	overrepresented
GO:0006818	3.49E-09	11.834375	2.141941	14	30	hydrogen transport	nurse_upregulated_genes	overrepresented
GO:0022904	1.64E-08	22.31481481	1.142368534	10	16	respiratory electron transport chain	nurse_upregulated_genes	overrepresented
GO:0042773	2.47E-08	53.27607362	0.713980333	8	10	ATP synthesis coupled electron transport	nurse_upregulated_genes	overrepresented
GO:1902600	5.61E-08	11.52617569	1.856348867	12	26	hydrogen ion transmembrane transport	nurse_upregulated_genes	overrepresented
GO:0015985	5.61E-08	11.52617569	1.856348867	12	26	energy coupled proton transport, down electrochemical gradient	nurse_upregulated_genes	overrepresented
GO:0015986	5.61E-08	11.52617569	1.856348867	12	26	ATP synthesis coupled proton transport	nurse_upregulated_genes	overrepresented
GO:0034220	2.48E-07	9.48556814	2.070542967	12	29	ion transmembrane transport	nurse_upregulated_genes	overrepresented
GO:0042775	2.83E-07	46.47400612	0.6425823	7	9	mitochondrial ATP synthesis coupled electron transport	nurse_upregulated_genes	overrepresented
GO:0015672	1.38E-06	3.578120617	8.282171868	24	116	monovalent inorganic cation transport	nurse_upregulated_genes	overrepresented
GO:0006754	2.80E-06	6.242545616	2.927319367	13	41	ATP biosynthetic process	nurse_upregulated_genes	overrepresented
GO:0046034	2.80E-06	6.242545616	2.927319367	13	41	ATP metabolic process	nurse_upregulated_genes	overrepresented
GO:0009167	3.54E-06	5.545955882	3.427105601	14	48	purine ribonucleoside monophosphate metabolic process	nurse_upregulated_genes	overrepresented
GO:0009126	3.54E-06	5.545955882	3.427105601	14	48	purine nucleoside monophosphate metabolic process	nurse_upregulated_genes	overrepresented
GO:0009145	6.78E-06	5.634509095	3.141513467	13	44	purine nucleoside triphosphate biosynthetic process	nurse_upregulated_genes	overrepresented
GO:0009206	6.78E-06	5.634509095	3.141513467	13	44	purine ribonucleoside triphosphate biosynthetic process	nurse_upregulated_genes	overrepresented
GO:0044724	7.16E-06	6.189202102	2.713125267	12	38	single-organism carbohydrate catabolic process	nurse_upregulated_genes	overrepresented
GO:0016052	7.16E-06	6.189202102	2.713125267	12	38	carbohydrate catabolic process	nurse_upregulated_genes	overrepresented
GO:0046129	7.78E-06	5.092736486	3.641299701	14	51	purine ribonucleoside biosynthetic process	nurse_upregulated_genes	overrepresented
GO:0042451	7.78E-06	5.092736486	3.641299701	14	51	purine nucleoside biosynthetic process	nurse_upregulated_genes	overrepresented
GO:0006096	8.48E-06	7.855846042	1.9277469	10	27	glycolysis	nurse_upregulated_genes	overrepresented
GO:0043648	8.54E-06	11.8200409	1.213766567	8	17	dicarboxylic acid metabolic process	nurse_upregulated_genes	overrepresented
GO:0044712	9.11E-06	3.057096625	9.781530569	25	137	single-organism catabolic process	nurse_upregulated_genes	overrepresented
GO:0009142	1.17E-05	5.290569244	3.284309534	13	46	nucleoside triphosphate biosynthetic process	nurse_upregulated_genes	overrepresented
GO:0009201	1.17E-05	5.290569244	3.284309534	13	46	ribonucleoside triphosphate biosynthetic process	nurse_upregulated_genes	overrepresented
GO:0009161	1.27E-05	4.829326923	3.784095767	14	53	ribonucleoside monophosphate metabolic process	nurse_upregulated_genes	overrepresented
GO:0019318	1.27E-05	4.829326923	3.784095767	14	53	hexose metabolic process	nurse_upregulated_genes	overrepresented
GO:0046365	1.34E-05	6.398034729	2.427533134	11	34	monosaccharide catabolic process	nurse_upregulated_genes	overrepresented
GO:0019320	1.34E-05	6.398034729	2.427533134	11	34	hexose catabolic process	nurse_upregulated_genes	overrepresented
GO:0006007	1.34E-05	6.398034729	2.427533134	11	34	glucose catabolic process	nurse_upregulated_genes	overrepresented
GO:0009168	1.51E-05	5.133773135	3.355707567	13	47	purine ribonucleoside monophosphate biosynthetic process	nurse_upregulated_genes	overrepresented
GO:0009127	1.51E-05	5.133773135	3.355707567	13	47	purine nucleoside monophosphate biosynthetic process	nurse_upregulated_genes	overrepresented
GO:0009163	1.60E-05	4.7075	3.855493801	14	54	nucleoside biosynthetic process	nurse_upregulated_genes	overrepresented
GO:0005996	1.60E-05	4.7075	3.855493801	14	54	monosaccharide metabolic process	nurse_upregulated_genes	overrepresented
GO:0009123	1.60E-05	4.7075	3.855493801	14	54	nucleoside monophosphate metabolic process	nurse_upregulated_genes	overrepresented
GO:1901659	1.60E-05	4.7075	3.855493801	14	54	glycosyl compound biosynthetic process	nurse_upregulated_genes	overrepresented
GO:0042455	1.60E-05	4.7075	3.855493801	14	54	ribonucleoside biosynthetic process	nurse_upregulated_genes	overrepresented
GO:0005975	1.75E-05	2.922993942	10.13852074	25	142	carbohydrate metabolic process	nurse_upregulated_genes	overrepresented
GO:0006006	2.93E-05	5.184932879	3.070115434	12	43	glucose metabolic process	nurse_upregulated_genes	overrepresented
GO:0009156	4.91E-05	4.470404984	3.712697734	13	52	ribonucleoside monophosphate biosynthetic process	nurse_upregulated_genes	overrepresented
GO:0009124	6.09E-05	4.357632399	3.784095767	13	53	nucleoside monophosphate biosynthetic process	nurse_upregulated_genes	overrepresented
GO:0006030	0.000117657	7.082208589	1.642154767	8	23	chitin metabolic process	nurse_upregulated_genes	overrepresented
GO:0006106	0.000120557	52.64242424	0.356990167	4	5	fumarate metabolic process	nurse_upregulated_genes	overrepresented
GO:0046128	0.000171999	3.261292167	5.854638735	16	82	purine ribonucleoside metabolic process	nurse_upregulated_genes	overrepresented
GO:0042278	0.000171999	3.261292167	5.854638735	16	82	purine nucleoside metabolic process	nurse_upregulated_genes	overrepresented
GO:0009152	0.000173964	3.611057692	4.712270201	14	66	purine ribonucleotide biosynthetic process	nurse_upregulated_genes	overrepresented
GO:1901135	0.000205726	2.243852459	15.2077811	30	213	carbohydrate derivative metabolic process	nurse_upregulated_genes	overrepresented
GO:1901071	0.000228659	6.246120534	1.784950834	8	25	glucosamine-containing compound metabolic process	nurse_upregulated_genes	overrepresented
GO:0006040	0.000228659	6.246120534	1.784950834	8	25	amino sugar metabolic process	nurse_upregulated_genes	overrepresented
GO:0006164	0.000242922	3.475694444	4.855066268	14	68	purine nucleotide biosynthetic process	nurse_upregulated_genes	overrepresented
GO:0009119	0.000266127	3.11730927	6.068832835	16	85	ribonucleoside metabolic process	nurse_upregulated_genes	overrepresented
GO:0006811	0.000333864	1.963751083	22.34758444	39	313	ion transport	nurse_upregulated_genes	overrepresented
GO:0046390	0.000334188	3.35	4.997862334	14	70	ribose phosphate biosynthetic process	nurse_upregulated_genes	overrepresented
GO:0009260	0.000334188	3.35	4.997862334	14	70	ribonucleotide biosynthetic process	nurse_upregulated_genes	overrepresented
GO:0006072	0.000341291	26.31515152	0.4283882	4	6	glycerol-3-phosphate metabolic process	nurse_upregulated_genes	overrepresented
GO:0046168	0.000360933	Inf	0.2141941	3	3	glycerol-3-phosphate catabolic process	nurse_upregulated_genes	overrepresented
GO:0046149	0.000360933	Inf	0.2141941	3	3	pigment catabolic process	nurse_upregulated_genes	overrepresented
GO:0009169	0.000360933	Inf	0.2141941	3	3	purine ribonucleoside monophosphate catabolic process	nurse_upregulated_genes	overrepresented
GO:0009158	0.000360933	Inf	0.2141941	3	3	ribonucleoside monophosphate catabolic process	nurse_upregulated_genes	overrepresented
GO:0009125	0.000360933	Inf	0.2141941	3	3	nucleoside monophosphate catabolic process	nurse_upregulated_genes	overrepresented
GO:0009128	0.000360933	Inf	0.2141941	3	3	purine nucleoside monophosphate catabolic process	nurse_upregulated_genes	overrepresented
GO:0042167	0.000360933	Inf	0.2141941	3	3	heme catabolic process	nurse_upregulated_genes	overrepresented
GO:0042777	0.000360933	Inf	0.2141941	3	3	plasma membrane ATP synthesis coupled proton transport	nurse_upregulated_genes	overrepresented
GO:0072522	0.000389898	3.290460526	5.069260368	14	71	purine-containing compound biosynthetic process	nurse_upregulated_genes	overrepresented
GO:0009117	0.000635862	2.379948718	10.4955109	22	147	nucleotide metabolic process	nurse_upregulated_genes	overrepresented
GO:0006812	0.000670821	2.193232234	13.35143224	26	187	cation transport	nurse_upregulated_genes	overrepresented
GO:0044723	0.000675437	2.632636214	7.853783668	18	110	single-organism carbohydrate metabolic process	nurse_upregulated_genes	overrepresented
GO:0019637	0.000709774	2.116775599	14.85079094	28	208	organophosphate metabolic process	nurse_upregulated_genes	overrepresented
GO:0052646	0.000751575	17.53939394	0.499786233	4	7	alditol phosphate metabolic process	nurse_upregulated_genes	overrepresented
GO:0009116	0.000858959	2.751814224	6.711415135	16	94	nucleoside metabolic process	nurse_upregulated_genes	overrepresented
GO:1901657	0.000858959	2.751814224	6.711415135	16	94	glycosyl compound metabolic process	nurse_upregulated_genes	overrepresented
GO:0035151	0.00093788	9.415979158	0.8567764	5	12	regulation of tube size, open tracheal system	nurse_upregulated_genes	overrepresented
GO:0009144	0.001133915	3.045909165	4.997862334	13	70	purine nucleoside triphosphate metabolic process	nurse_upregulated_genes	overrepresented
GO:0009205	0.001133915	3.045909165	4.997862334	13	70	purine ribonucleoside triphosphate metabolic process	nurse_upregulated_genes	overrepresented
GO:0006753	0.001313439	2.232552535	11.06669517	22	155	nucleoside phosphate metabolic process	nurse_upregulated_genes	overrepresented
GO:0006787	0.001367068	39.36253776	0.285592133	3	4	porphyrin-containing compound catabolic process	nurse_upregulated_genes	overrepresented
GO:0033015	0.001367068	39.36253776	0.285592133	3	4	tetrapyrrole catabolic process	nurse_upregulated_genes	overrepresented
GO:0006120	0.001367068	39.36253776	0.285592133	3	4	mitochondrial electron transport, NADH to ubiquinone	nurse_upregulated_genes	overrepresented
GO:0006122	0.001367068	39.36253776	0.285592133	3	4	mitochondrial electron transport, ubiquinol to cytochrome c	nurse_upregulated_genes	overrepresented
GO:0030708	0.001418848	13.15151515	0.571184267	4	8	germarium-derived female germ-line cyst encapsulation	nurse_upregulated_genes	overrepresented
GO:0048138	0.001418848	13.15151515	0.571184267	4	8	germ-line cyst encapsulation	nurse_upregulated_genes	overrepresented
GO:0048139	0.001418848	13.15151515	0.571184267	4	8	female germ-line cyst encapsulation	nurse_upregulated_genes	overrepresented
GO:0048580	0.001418848	13.15151515	0.571184267	4	8	regulation of post-embryonic development	nurse_upregulated_genes	overrepresented
GO:0045611	0.001418848	13.15151515	0.571184267	4	8	negative regulation of hemocyte differentiation	nurse_upregulated_genes	overrepresented
GO:0045613	0.001418848	13.15151515	0.571184267	4	8	regulation of plasmatocyte differentiation	nurse_upregulated_genes	overrepresented
GO:0045614	0.001418848	13.15151515	0.571184267	4	8	negative regulation of plasmatocyte differentiation	nurse_upregulated_genes	overrepresented
GO:0035203	0.001418848	13.15151515	0.571184267	4	8	regulation of lamellocyte differentiation	nurse_upregulated_genes	overrepresented
GO:0035204	0.001418848	13.15151515	0.571184267	4	8	negative regulation of lamellocyte differentiation	nurse_upregulated_genes	overrepresented
GO:0009199	0.001487376	2.941285179	5.140658401	13	72	ribonucleoside triphosphate metabolic process	nurse_upregulated_genes	overrepresented
GO:1901575	0.001528193	1.904045808	18.6348867	32	261	organic substance catabolic process	nurse_upregulated_genes	overrepresented
GO:0009141	0.001695799	2.891588785	5.212056434	13	73	nucleoside triphosphate metabolic process	nurse_upregulated_genes	overrepresented
GO:0009150	0.001699136	2.551662174	7.139803335	16	100	purine ribonucleotide metabolic process	nurse_upregulated_genes	overrepresented
GO:0044699	0.002089425	1.42258213	206.2689183	231	2889	single-organism process	nurse_upregulated_genes	overrepresented
GO:0009259	0.002328939	2.461938842	7.353997435	16	103	ribonucleotide metabolic process	nurse_upregulated_genes	overrepresented
GO:0019693	0.002328939	2.461938842	7.353997435	16	103	ribose phosphate metabolic process	nurse_upregulated_genes	overrepresented
GO:0042387	0.00241104	10.51878788	0.6425823	4	9	plasmatocyte differentiation	nurse_upregulated_genes	overrepresented
GO:0035171	0.00241104	10.51878788	0.6425823	4	9	lamellocyte differentiation	nurse_upregulated_genes	overrepresented
GO:0035150	0.002973695	6.58662614	1.0709705	5	15	regulation of tube size	nurse_upregulated_genes	overrepresented
GO:0006163	0.003142354	2.378197065	7.568191535	16	106	purine nucleotide metabolic process	nurse_upregulated_genes	overrepresented
GO:0051187	0.003236834	19.67673716	0.356990167	3	5	cofactor catabolic process	nurse_upregulated_genes	overrepresented
GO:0009165	0.003436124	2.524493243	6.283026935	14	88	nucleotide biosynthetic process	nurse_upregulated_genes	overrepresented
GO:0035168	0.003794139	8.763636364	0.713980333	4	10	larval lymph gland hemocyte differentiation	nurse_upregulated_genes	overrepresented
GO:1901564	0.003938789	1.679441801	25.41769987	39	356	organonitrogen compound metabolic process	nurse_upregulated_genes	overrepresented
GO:0055086	0.004948351	1.971538462	12.28046174	22	172	nucleobase-containing small molecule metabolic process	nurse_upregulated_genes	overrepresented
GO:0006200	0.005083503	Inf	0.142796067	2	2	ATP catabolic process	nurse_upregulated_genes	overrepresented
GO:0006933	0.005083503	Inf	0.142796067	2	2	negative regulation of cell adhesion involved in substrate-bound cell migration	nurse_upregulated_genes	overrepresented
GO:0009409	0.005083503	Inf	0.142796067	2	2	response to cold	nurse_upregulated_genes	overrepresented
GO:0009180	0.005083503	Inf	0.142796067	2	2	purine ribonucleoside diphosphate biosynthetic process	nurse_upregulated_genes	overrepresented
GO:0009188	0.005083503	Inf	0.142796067	2	2	ribonucleoside diphosphate biosynthetic process	nurse_upregulated_genes	overrepresented
GO:0048570	0.005083503	Inf	0.142796067	2	2	notochord morphogenesis	nurse_upregulated_genes	overrepresented
GO:0015979	0.005083503	Inf	0.142796067	2	2	photosynthesis	nurse_upregulated_genes	overrepresented
GO:0019684	0.005083503	Inf	0.142796067	2	2	photosynthesis, light reaction	nurse_upregulated_genes	overrepresented
GO:0046031	0.005083503	Inf	0.142796067	2	2	ADP metabolic process	nurse_upregulated_genes	overrepresented
GO:0006172	0.005083503	Inf	0.142796067	2	2	ADP biosynthetic process	nurse_upregulated_genes	overrepresented
GO:0006127	0.005083503	Inf	0.142796067	2	2	glycerophosphate shuttle	nurse_upregulated_genes	overrepresented
GO:0044281	0.005343931	1.606050363	29.20179564	43	409	small molecule metabolic process	nurse_upregulated_genes	overrepresented
GO:0006022	0.005392955	3.414209381	2.784523301	8	39	aminoglycan metabolic process	nurse_upregulated_genes	overrepresented
GO:1901293	0.005725853	2.361946203	6.640017101	14	93	nucleoside phosphate biosynthetic process	nurse_upregulated_genes	overrepresented
GO:0072521	0.005977762	2.202943656	8.067977768	16	113	purine-containing compound metabolic process	nurse_upregulated_genes	overrepresented
GO:1901565	0.006674316	2.40290758	6.068832835	13	85	organonitrogen compound catabolic process	nurse_upregulated_genes	overrepresented
GO:0006793	0.007389524	1.495247	40.05429671	55	561	phosphorus metabolic process	nurse_upregulated_genes	overrepresented
GO:0006778	0.007976528	6.56969697	0.8567764	4	12	porphyrin-containing compound metabolic process	nurse_upregulated_genes	overrepresented
GO:0033013	0.007976528	6.56969697	0.8567764	4	12	tetrapyrrole metabolic process	nurse_upregulated_genes	overrepresented
GO:0009056	0.008342203	1.671226572	20.7768277	32	291	catabolic process	nurse_upregulated_genes	overrepresented
GO:0006796	0.009252283	1.479341317	39.62590851	54	555	phosphate-containing compound metabolic process	nurse_upregulated_genes	overrepresented
GO:0044765	0.009787964	1.429806076	49.47883711	65	693	single-organism transport	nurse_upregulated_genes	overrepresented
GO:0008302	0.010167979	9.833836858	0.499786233	3	7	female germline ring canal formation, actin assembly	nurse_upregulated_genes	overrepresented
GO:0042168	0.010167979	9.833836858	0.499786233	3	7	heme metabolic process	nurse_upregulated_genes	overrepresented
GO:1901566	0.010606805	1.884812057	11.5664814	20	162	organonitrogen compound biosynthetic process	nurse_upregulated_genes	overrepresented
GO:0051186	0.011482561	2.547483381	4.426678068	10	62	cofactor metabolic process	nurse_upregulated_genes	overrepresented
GO:0055085	0.014235226	1.703136037	15.8503634	25	222	transmembrane transport	nurse_upregulated_genes	overrepresented
GO:0002683	0.014395389	5.253333333	0.999572467	4	14	negative regulation of immune system process	nurse_upregulated_genes	overrepresented
GO:0046845	0.014528644	26.1626506	0.2141941	2	3	branched duct epithelial cell fate determination, open tracheal system	nurse_upregulated_genes	overrepresented
GO:0009133	0.014528644	26.1626506	0.2141941	2	3	nucleoside diphosphate biosynthetic process	nurse_upregulated_genes	overrepresented
GO:0009136	0.014528644	26.1626506	0.2141941	2	3	purine nucleoside diphosphate biosynthetic process	nurse_upregulated_genes	overrepresented
GO:0046843	0.015417457	7.865256798	0.571184267	3	8	dorsal appendage formation	nurse_upregulated_genes	overrepresented
GO:0035158	0.015417457	7.865256798	0.571184267	3	8	regulation of tube diameter, open tracheal system	nurse_upregulated_genes	overrepresented
GO:0035296	0.015417457	7.865256798	0.571184267	3	8	regulation of tube diameter	nurse_upregulated_genes	overrepresented
GO:0044711	0.016322685	1.602443609	20.1342454	30	282	single-organism biosynthetic process	nurse_upregulated_genes	overrepresented
GO:1901137	0.016503104	1.936649514	8.996152202	16	126	carbohydrate derivative biosynthetic process	nurse_upregulated_genes	overrepresented
GO:0006813	0.021238935	2.575490049	3.498503634	8	49	potassium ion transport	nurse_upregulated_genes	overrepresented
GO:0006835	0.021920665	6.552870091	0.6425823	3	9	dicarboxylic acid transport	nurse_upregulated_genes	overrepresented
GO:0042078	0.021920665	6.552870091	0.6425823	3	9	germ-line stem cell division	nurse_upregulated_genes	overrepresented
GO:0016321	0.021920665	6.552870091	0.6425823	3	9	female meiosis chromosome segregation	nurse_upregulated_genes	overrepresented
GO:0006810	0.023581907	1.313647447	70.04147071	85	981	transport	nurse_upregulated_genes	overrepresented
GO:1901136	0.023770684	2.513584575	3.569901667	8	50	carbohydrate derivative catabolic process	nurse_upregulated_genes	overrepresented
GO:0046348	0.02769022	13.07831325	0.285592133	2	4	amino sugar catabolic process	nurse_upregulated_genes	overrepresented
GO:0001522	0.02769022	13.07831325	0.285592133	2	4	pseudouridine synthesis	nurse_upregulated_genes	overrepresented
GO:1901072	0.02769022	13.07831325	0.285592133	2	4	glucosamine-containing compound catabolic process	nurse_upregulated_genes	overrepresented
GO:0018149	0.02769022	13.07831325	0.285592133	2	4	peptide cross-linking	nurse_upregulated_genes	overrepresented
GO:0030903	0.02769022	13.07831325	0.285592133	2	4	notochord development	nurse_upregulated_genes	overrepresented
GO:0007352	0.02769022	13.07831325	0.285592133	2	4	zygotic specification of dorsal/ventral axis	nurse_upregulated_genes	overrepresented
GO:0007378	0.02769022	13.07831325	0.285592133	2	4	amnioserosa formation	nurse_upregulated_genes	overrepresented
GO:0007313	0.02769022	13.07831325	0.285592133	2	4	maternal specification of dorsal/ventral axis, oocyte, soma encoded	nurse_upregulated_genes	overrepresented
GO:0007458	0.02769022	13.07831325	0.285592133	2	4	progression of morphogenetic furrow involved in compound eye morphogenesis	nurse_upregulated_genes	overrepresented
GO:0009185	0.02769022	13.07831325	0.285592133	2	4	ribonucleoside diphosphate metabolic process	nurse_upregulated_genes	overrepresented
GO:0009179	0.02769022	13.07831325	0.285592133	2	4	purine ribonucleoside diphosphate metabolic process	nurse_upregulated_genes	overrepresented
GO:0042381	0.02769022	13.07831325	0.285592133	2	4	hemolymph coagulation	nurse_upregulated_genes	overrepresented
GO:0006032	0.02769022	13.07831325	0.285592133	2	4	chitin catabolic process	nurse_upregulated_genes	overrepresented
GO:0035221	0.02769022	13.07831325	0.285592133	2	4	genital disc pattern formation	nurse_upregulated_genes	overrepresented
GO:0035224	0.02769022	13.07831325	0.285592133	2	4	genital disc anterior/posterior pattern formation	nurse_upregulated_genes	overrepresented
GO:0035217	0.02769022	13.07831325	0.285592133	2	4	labial disc development	nurse_upregulated_genes	overrepresented
GO:0006108	0.02769022	13.07831325	0.285592133	2	4	malate metabolic process	nurse_upregulated_genes	overrepresented
GO:0090407	0.027701116	1.84430512	8.781958102	15	123	organophosphate biosynthetic process	nurse_upregulated_genes	overrepresented
GO:0005976	0.028890263	4.038228438	1.213766567	4	17	polysaccharide metabolic process	nurse_upregulated_genes	overrepresented
GO:0045610	0.028890263	4.038228438	1.213766567	4	17	regulation of hemocyte differentiation	nurse_upregulated_genes	overrepresented
GO:0007301	0.029689177	5.615451014	0.713980333	3	10	female germline ring canal formation	nurse_upregulated_genes	overrepresented
GO:0051234	0.030481152	1.29238478	71.75502351	86	1005	establishment of localization	nurse_upregulated_genes	overrepresented
GO:0046434	0.030765102	2.561671764	3.070115434	7	43	organophosphate catabolic process	nurse_upregulated_genes	overrepresented
GO:0030725	0.038711251	4.912386707	0.785378367	3	11	germline ring canal formation	nurse_upregulated_genes	overrepresented
GO:0043063	0.038711251	4.912386707	0.785378367	3	11	intercellular bridge organization	nurse_upregulated_genes	overrepresented
GO:0035152	0.039506889	2.98563139	1.9277469	5	27	regulation of tube architecture, open tracheal system	nurse_upregulated_genes	overrepresented
GO:0046700	0.042251068	2.000561167	5.426250534	10	76	heterocycle catabolic process	nurse_upregulated_genes	overrepresented
GO:0034032	0.043992477	8.71686747	0.356990167	2	5	purine nucleoside bisphosphate metabolic process	nurse_upregulated_genes	overrepresented
GO:0003156	0.043992477	8.71686747	0.356990167	2	5	regulation of organ formation	nurse_upregulated_genes	overrepresented
GO:0046663	0.043992477	8.71686747	0.356990167	2	5	dorsal closure, leading edge cell differentiation	nurse_upregulated_genes	overrepresented
GO:0046605	0.043992477	8.71686747	0.356990167	2	5	regulation of centrosome cycle	nurse_upregulated_genes	overrepresented
GO:0009065	0.043992477	8.71686747	0.356990167	2	5	glutamine family amino acid catabolic process	nurse_upregulated_genes	overrepresented
GO:0048100	0.043992477	8.71686747	0.356990167	2	5	wing disc anterior/posterior pattern formation	nurse_upregulated_genes	overrepresented
GO:0035026	0.043992477	8.71686747	0.356990167	2	5	leading edge cell differentiation	nurse_upregulated_genes	overrepresented
GO:0007473	0.043992477	8.71686747	0.356990167	2	5	wing disc proximal/distal pattern formation	nurse_upregulated_genes	overrepresented
GO:0045704	0.043992477	8.71686747	0.356990167	2	5	regulation of salivary gland boundary specification	nurse_upregulated_genes	overrepresented
GO:0045705	0.043992477	8.71686747	0.356990167	2	5	negative regulation of salivary gland boundary specification	nurse_upregulated_genes	overrepresented
GO:0009135	0.043992477	8.71686747	0.356990167	2	5	purine nucleoside diphosphate metabolic process	nurse_upregulated_genes	overrepresented
GO:0040010	0.043992477	8.71686747	0.356990167	2	5	positive regulation of growth rate	nurse_upregulated_genes	overrepresented
GO:0040009	0.043992477	8.71686747	0.356990167	2	5	regulation of growth rate	nurse_upregulated_genes	overrepresented
GO:0048636	0.043992477	8.71686747	0.356990167	2	5	positive regulation of muscle organ development	nurse_upregulated_genes	overrepresented
GO:0015936	0.043992477	8.71686747	0.356990167	2	5	coenzyme A metabolic process	nurse_upregulated_genes	overrepresented
GO:0035159	0.043992477	8.71686747	0.356990167	2	5	regulation of tube length, open tracheal system	nurse_upregulated_genes	overrepresented
GO:0035263	0.043992477	8.71686747	0.356990167	2	5	genital disc sexually dimorphic development	nurse_upregulated_genes	overrepresented
GO:0010824	0.043992477	8.71686747	0.356990167	2	5	regulation of centrosome duplication	nurse_upregulated_genes	overrepresented
GO:0033865	0.043992477	8.71686747	0.356990167	2	5	nucleoside bisphosphate metabolic process	nurse_upregulated_genes	overrepresented
GO:0033875	0.043992477	8.71686747	0.356990167	2	5	ribonucleoside bisphosphate metabolic process	nurse_upregulated_genes	overrepresented
GO:0043062	0.049715598	3.278787879	1.427960667	4	20	extracellular structure organization	nurse_upregulated_genes	overrepresented
GO:0006091	9.81E-25	12.79333382	6.283026935	41	88	generation of precursor metabolites and energy	nurse_upregulated_genes	underrepresented
GO:0045333	2.71E-21	31.86966755	2.570329201	25	36	cellular respiration	nurse_upregulated_genes	underrepresented
GO:0015980	2.66E-20	18.83660131	3.498503634	28	49	energy derivation by oxidation of organic compounds	nurse_upregulated_genes	underrepresented
GO:0055114	8.56E-18	4.659180236	18.2064985	60	255	oxidation-reduction process	nurse_upregulated_genes	underrepresented
GO:0006099	1.41E-14	51.01880878	1.356562634	15	19	tricarboxylic acid cycle	nurse_upregulated_genes	underrepresented
GO:0009060	1.63E-14	36.37735849	1.570756734	16	22	aerobic respiration	nurse_upregulated_genes	underrepresented
GO:0006119	7.14E-10	44.66049383	0.928174434	10	13	oxidative phosphorylation	nurse_upregulated_genes	underrepresented
GO:0022900	1.21E-09	15.95270462	1.7135528	13	24	electron transport chain	nurse_upregulated_genes	underrepresented
GO:0015992	1.99E-09	12.62625	2.070542967	14	29	proton transport	nurse_upregulated_genes	underrepresented
GO:0044710	2.37E-09	2.114149097	68.47071398	113	959	single-organism metabolic process	nurse_upregulated_genes	underrepresented
GO:0006818	3.49E-09	11.834375	2.141941	14	30	hydrogen transport	nurse_upregulated_genes	underrepresented
GO:0022904	1.64E-08	22.31481481	1.142368534	10	16	respiratory electron transport chain	nurse_upregulated_genes	underrepresented
GO:0042773	2.47E-08	53.27607362	0.713980333	8	10	ATP synthesis coupled electron transport	nurse_upregulated_genes	underrepresented
GO:1902600	5.61E-08	11.52617569	1.856348867	12	26	hydrogen ion transmembrane transport	nurse_upregulated_genes	underrepresented
GO:0015985	5.61E-08	11.52617569	1.856348867	12	26	energy coupled proton transport, down electrochemical gradient	nurse_upregulated_genes	underrepresented
GO:0015986	5.61E-08	11.52617569	1.856348867	12	26	ATP synthesis coupled proton transport	nurse_upregulated_genes	underrepresented
GO:0034220	2.48E-07	9.48556814	2.070542967	12	29	ion transmembrane transport	nurse_upregulated_genes	underrepresented
GO:0042775	2.83E-07	46.47400612	0.6425823	7	9	mitochondrial ATP synthesis coupled electron transport	nurse_upregulated_genes	underrepresented
GO:0015672	1.38E-06	3.578120617	8.282171868	24	116	monovalent inorganic cation transport	nurse_upregulated_genes	underrepresented
GO:0006754	2.80E-06	6.242545616	2.927319367	13	41	ATP biosynthetic process	nurse_upregulated_genes	underrepresented
GO:0046034	2.80E-06	6.242545616	2.927319367	13	41	ATP metabolic process	nurse_upregulated_genes	underrepresented
GO:0009167	3.54E-06	5.545955882	3.427105601	14	48	purine ribonucleoside monophosphate metabolic process	nurse_upregulated_genes	underrepresented
GO:0009126	3.54E-06	5.545955882	3.427105601	14	48	purine nucleoside monophosphate metabolic process	nurse_upregulated_genes	underrepresented
GO:0009145	6.78E-06	5.634509095	3.141513467	13	44	purine nucleoside triphosphate biosynthetic process	nurse_upregulated_genes	underrepresented
GO:0009206	6.78E-06	5.634509095	3.141513467	13	44	purine ribonucleoside triphosphate biosynthetic process	nurse_upregulated_genes	underrepresented
GO:0044724	7.16E-06	6.189202102	2.713125267	12	38	single-organism carbohydrate catabolic process	nurse_upregulated_genes	underrepresented
GO:0016052	7.16E-06	6.189202102	2.713125267	12	38	carbohydrate catabolic process	nurse_upregulated_genes	underrepresented
GO:0046129	7.78E-06	5.092736486	3.641299701	14	51	purine ribonucleoside biosynthetic process	nurse_upregulated_genes	underrepresented
GO:0042451	7.78E-06	5.092736486	3.641299701	14	51	purine nucleoside biosynthetic process	nurse_upregulated_genes	underrepresented
GO:0006096	8.48E-06	7.855846042	1.9277469	10	27	glycolysis	nurse_upregulated_genes	underrepresented
GO:0043648	8.54E-06	11.8200409	1.213766567	8	17	dicarboxylic acid metabolic process	nurse_upregulated_genes	underrepresented
GO:0044712	9.11E-06	3.057096625	9.781530569	25	137	single-organism catabolic process	nurse_upregulated_genes	underrepresented
GO:0009142	1.17E-05	5.290569244	3.284309534	13	46	nucleoside triphosphate biosynthetic process	nurse_upregulated_genes	underrepresented
GO:0009201	1.17E-05	5.290569244	3.284309534	13	46	ribonucleoside triphosphate biosynthetic process	nurse_upregulated_genes	underrepresented
GO:0009161	1.27E-05	4.829326923	3.784095767	14	53	ribonucleoside monophosphate metabolic process	nurse_upregulated_genes	underrepresented
GO:0019318	1.27E-05	4.829326923	3.784095767	14	53	hexose metabolic process	nurse_upregulated_genes	underrepresented
GO:0046365	1.34E-05	6.398034729	2.427533134	11	34	monosaccharide catabolic process	nurse_upregulated_genes	underrepresented
GO:0019320	1.34E-05	6.398034729	2.427533134	11	34	hexose catabolic process	nurse_upregulated_genes	underrepresented
GO:0006007	1.34E-05	6.398034729	2.427533134	11	34	glucose catabolic process	nurse_upregulated_genes	underrepresented
GO:0009168	1.51E-05	5.133773135	3.355707567	13	47	purine ribonucleoside monophosphate biosynthetic process	nurse_upregulated_genes	underrepresented
GO:0009127	1.51E-05	5.133773135	3.355707567	13	47	purine nucleoside monophosphate biosynthetic process	nurse_upregulated_genes	underrepresented
GO:0009163	1.60E-05	4.7075	3.855493801	14	54	nucleoside biosynthetic process	nurse_upregulated_genes	underrepresented
GO:0005996	1.60E-05	4.7075	3.855493801	14	54	monosaccharide metabolic process	nurse_upregulated_genes	underrepresented
GO:0009123	1.60E-05	4.7075	3.855493801	14	54	nucleoside monophosphate metabolic process	nurse_upregulated_genes	underrepresented
GO:1901659	1.60E-05	4.7075	3.855493801	14	54	glycosyl compound biosynthetic process	nurse_upregulated_genes	underrepresented
GO:0042455	1.60E-05	4.7075	3.855493801	14	54	ribonucleoside biosynthetic process	nurse_upregulated_genes	underrepresented
GO:0005975	1.75E-05	2.922993942	10.13852074	25	142	carbohydrate metabolic process	nurse_upregulated_genes	underrepresented
GO:0006006	2.93E-05	5.184932879	3.070115434	12	43	glucose metabolic process	nurse_upregulated_genes	underrepresented
GO:0009156	4.91E-05	4.470404984	3.712697734	13	52	ribonucleoside monophosphate biosynthetic process	nurse_upregulated_genes	underrepresented
GO:0009124	6.09E-05	4.357632399	3.784095767	13	53	nucleoside monophosphate biosynthetic process	nurse_upregulated_genes	underrepresented
GO:0006030	0.000117657	7.082208589	1.642154767	8	23	chitin metabolic process	nurse_upregulated_genes	underrepresented
GO:0006106	0.000120557	52.64242424	0.356990167	4	5	fumarate metabolic process	nurse_upregulated_genes	underrepresented
GO:0046128	0.000171999	3.261292167	5.854638735	16	82	purine ribonucleoside metabolic process	nurse_upregulated_genes	underrepresented
GO:0042278	0.000171999	3.261292167	5.854638735	16	82	purine nucleoside metabolic process	nurse_upregulated_genes	underrepresented
GO:0009152	0.000173964	3.611057692	4.712270201	14	66	purine ribonucleotide biosynthetic process	nurse_upregulated_genes	underrepresented
GO:1901135	0.000205726	2.243852459	15.2077811	30	213	carbohydrate derivative metabolic process	nurse_upregulated_genes	underrepresented
GO:1901071	0.000228659	6.246120534	1.784950834	8	25	glucosamine-containing compound metabolic process	nurse_upregulated_genes	underrepresented
GO:0006040	0.000228659	6.246120534	1.784950834	8	25	amino sugar metabolic process	nurse_upregulated_genes	underrepresented
GO:0006164	0.000242922	3.475694444	4.855066268	14	68	purine nucleotide biosynthetic process	nurse_upregulated_genes	underrepresented
GO:0009119	0.000266127	3.11730927	6.068832835	16	85	ribonucleoside metabolic process	nurse_upregulated_genes	underrepresented
GO:0006811	0.000333864	1.963751083	22.34758444	39	313	ion transport	nurse_upregulated_genes	underrepresented
GO:0046390	0.000334188	3.35	4.997862334	14	70	ribose phosphate biosynthetic process	nurse_upregulated_genes	underrepresented
GO:0009260	0.000334188	3.35	4.997862334	14	70	ribonucleotide biosynthetic process	nurse_upregulated_genes	underrepresented
GO:0006072	0.000341291	26.31515152	0.4283882	4	6	glycerol-3-phosphate metabolic process	nurse_upregulated_genes	underrepresented
GO:0046168	0.000360933	Inf	0.2141941	3	3	glycerol-3-phosphate catabolic process	nurse_upregulated_genes	underrepresented
GO:0046149	0.000360933	Inf	0.2141941	3	3	pigment catabolic process	nurse_upregulated_genes	underrepresented
GO:0009169	0.000360933	Inf	0.2141941	3	3	purine ribonucleoside monophosphate catabolic process	nurse_upregulated_genes	underrepresented
GO:0009158	0.000360933	Inf	0.2141941	3	3	ribonucleoside monophosphate catabolic process	nurse_upregulated_genes	underrepresented
GO:0009125	0.000360933	Inf	0.2141941	3	3	nucleoside monophosphate catabolic process	nurse_upregulated_genes	underrepresented
GO:0009128	0.000360933	Inf	0.2141941	3	3	purine nucleoside monophosphate catabolic process	nurse_upregulated_genes	underrepresented
GO:0042167	0.000360933	Inf	0.2141941	3	3	heme catabolic process	nurse_upregulated_genes	underrepresented
GO:0042777	0.000360933	Inf	0.2141941	3	3	plasma membrane ATP synthesis coupled proton transport	nurse_upregulated_genes	underrepresented
GO:0072522	0.000389898	3.290460526	5.069260368	14	71	purine-containing compound biosynthetic process	nurse_upregulated_genes	underrepresented
GO:0009117	0.000635862	2.379948718	10.4955109	22	147	nucleotide metabolic process	nurse_upregulated_genes	underrepresented
GO:0006812	0.000670821	2.193232234	13.35143224	26	187	cation transport	nurse_upregulated_genes	underrepresented
GO:0044723	0.000675437	2.632636214	7.853783668	18	110	single-organism carbohydrate metabolic process	nurse_upregulated_genes	underrepresented
GO:0019637	0.000709774	2.116775599	14.85079094	28	208	organophosphate metabolic process	nurse_upregulated_genes	underrepresented
GO:0052646	0.000751575	17.53939394	0.499786233	4	7	alditol phosphate metabolic process	nurse_upregulated_genes	underrepresented
GO:0009116	0.000858959	2.751814224	6.711415135	16	94	nucleoside metabolic process	nurse_upregulated_genes	underrepresented
GO:1901657	0.000858959	2.751814224	6.711415135	16	94	glycosyl compound metabolic process	nurse_upregulated_genes	underrepresented
GO:0035151	0.00093788	9.415979158	0.8567764	5	12	regulation of tube size, open tracheal system	nurse_upregulated_genes	underrepresented
GO:0009144	0.001133915	3.045909165	4.997862334	13	70	purine nucleoside triphosphate metabolic process	nurse_upregulated_genes	underrepresented
GO:0009205	0.001133915	3.045909165	4.997862334	13	70	purine ribonucleoside triphosphate metabolic process	nurse_upregulated_genes	underrepresented
GO:0006753	0.001313439	2.232552535	11.06669517	22	155	nucleoside phosphate metabolic process	nurse_upregulated_genes	underrepresented
GO:0006787	0.001367068	39.36253776	0.285592133	3	4	porphyrin-containing compound catabolic process	nurse_upregulated_genes	underrepresented
GO:0033015	0.001367068	39.36253776	0.285592133	3	4	tetrapyrrole catabolic process	nurse_upregulated_genes	underrepresented
GO:0006120	0.001367068	39.36253776	0.285592133	3	4	mitochondrial electron transport, NADH to ubiquinone	nurse_upregulated_genes	underrepresented
GO:0006122	0.001367068	39.36253776	0.285592133	3	4	mitochondrial electron transport, ubiquinol to cytochrome c	nurse_upregulated_genes	underrepresented
GO:0030708	0.001418848	13.15151515	0.571184267	4	8	germarium-derived female germ-line cyst encapsulation	nurse_upregulated_genes	underrepresented
GO:0048138	0.001418848	13.15151515	0.571184267	4	8	germ-line cyst encapsulation	nurse_upregulated_genes	underrepresented
GO:0048139	0.001418848	13.15151515	0.571184267	4	8	female germ-line cyst encapsulation	nurse_upregulated_genes	underrepresented
GO:0048580	0.001418848	13.15151515	0.571184267	4	8	regulation of post-embryonic development	nurse_upregulated_genes	underrepresented
GO:0045611	0.001418848	13.15151515	0.571184267	4	8	negative regulation of hemocyte differentiation	nurse_upregulated_genes	underrepresented
GO:0045613	0.001418848	13.15151515	0.571184267	4	8	regulation of plasmatocyte differentiation	nurse_upregulated_genes	underrepresented
GO:0045614	0.001418848	13.15151515	0.571184267	4	8	negative regulation of plasmatocyte differentiation	nurse_upregulated_genes	underrepresented
GO:0035203	0.001418848	13.15151515	0.571184267	4	8	regulation of lamellocyte differentiation	nurse_upregulated_genes	underrepresented
GO:0035204	0.001418848	13.15151515	0.571184267	4	8	negative regulation of lamellocyte differentiation	nurse_upregulated_genes	underrepresented
GO:0009199	0.001487376	2.941285179	5.140658401	13	72	ribonucleoside triphosphate metabolic process	nurse_upregulated_genes	underrepresented
GO:1901575	0.001528193	1.904045808	18.6348867	32	261	organic substance catabolic process	nurse_upregulated_genes	underrepresented
GO:0009141	0.001695799	2.891588785	5.212056434	13	73	nucleoside triphosphate metabolic process	nurse_upregulated_genes	underrepresented
GO:0009150	0.001699136	2.551662174	7.139803335	16	100	purine ribonucleotide metabolic process	nurse_upregulated_genes	underrepresented
GO:0044699	0.002089425	1.42258213	206.2689183	231	2889	single-organism process	nurse_upregulated_genes	underrepresented
GO:0009259	0.002328939	2.461938842	7.353997435	16	103	ribonucleotide metabolic process	nurse_upregulated_genes	underrepresented
GO:0019693	0.002328939	2.461938842	7.353997435	16	103	ribose phosphate metabolic process	nurse_upregulated_genes	underrepresented
GO:0042387	0.00241104	10.51878788	0.6425823	4	9	plasmatocyte differentiation	nurse_upregulated_genes	underrepresented
GO:0035171	0.00241104	10.51878788	0.6425823	4	9	lamellocyte differentiation	nurse_upregulated_genes	underrepresented
GO:0035150	0.002973695	6.58662614	1.0709705	5	15	regulation of tube size	nurse_upregulated_genes	underrepresented
GO:0006163	0.003142354	2.378197065	7.568191535	16	106	purine nucleotide metabolic process	nurse_upregulated_genes	underrepresented
GO:0051187	0.003236834	19.67673716	0.356990167	3	5	cofactor catabolic process	nurse_upregulated_genes	underrepresented
GO:0009165	0.003436124	2.524493243	6.283026935	14	88	nucleotide biosynthetic process	nurse_upregulated_genes	underrepresented
GO:0035168	0.003794139	8.763636364	0.713980333	4	10	larval lymph gland hemocyte differentiation	nurse_upregulated_genes	underrepresented
GO:1901564	0.003938789	1.679441801	25.41769987	39	356	organonitrogen compound metabolic process	nurse_upregulated_genes	underrepresented
GO:0055086	0.004948351	1.971538462	12.28046174	22	172	nucleobase-containing small molecule metabolic process	nurse_upregulated_genes	underrepresented
GO:0006200	0.005083503	Inf	0.142796067	2	2	ATP catabolic process	nurse_upregulated_genes	underrepresented
GO:0006933	0.005083503	Inf	0.142796067	2	2	negative regulation of cell adhesion involved in substrate-bound cell migration	nurse_upregulated_genes	underrepresented
GO:0009409	0.005083503	Inf	0.142796067	2	2	response to cold	nurse_upregulated_genes	underrepresented
GO:0009180	0.005083503	Inf	0.142796067	2	2	purine ribonucleoside diphosphate biosynthetic process	nurse_upregulated_genes	underrepresented
GO:0009188	0.005083503	Inf	0.142796067	2	2	ribonucleoside diphosphate biosynthetic process	nurse_upregulated_genes	underrepresented
GO:0048570	0.005083503	Inf	0.142796067	2	2	notochord morphogenesis	nurse_upregulated_genes	underrepresented
GO:0015979	0.005083503	Inf	0.142796067	2	2	photosynthesis	nurse_upregulated_genes	underrepresented
GO:0019684	0.005083503	Inf	0.142796067	2	2	photosynthesis, light reaction	nurse_upregulated_genes	underrepresented
GO:0046031	0.005083503	Inf	0.142796067	2	2	ADP metabolic process	nurse_upregulated_genes	underrepresented
GO:0006172	0.005083503	Inf	0.142796067	2	2	ADP biosynthetic process	nurse_upregulated_genes	underrepresented
GO:0006127	0.005083503	Inf	0.142796067	2	2	glycerophosphate shuttle	nurse_upregulated_genes	underrepresented
GO:0044281	0.005343931	1.606050363	29.20179564	43	409	small molecule metabolic process	nurse_upregulated_genes	underrepresented
GO:0006022	0.005392955	3.414209381	2.784523301	8	39	aminoglycan metabolic process	nurse_upregulated_genes	underrepresented
GO:1901293	0.005725853	2.361946203	6.640017101	14	93	nucleoside phosphate biosynthetic process	nurse_upregulated_genes	underrepresented
GO:0072521	0.005977762	2.202943656	8.067977768	16	113	purine-containing compound metabolic process	nurse_upregulated_genes	underrepresented
GO:1901565	0.006674316	2.40290758	6.068832835	13	85	organonitrogen compound catabolic process	nurse_upregulated_genes	underrepresented
GO:0006793	0.007389524	1.495247	40.05429671	55	561	phosphorus metabolic process	nurse_upregulated_genes	underrepresented
GO:0006778	0.007976528	6.56969697	0.8567764	4	12	porphyrin-containing compound metabolic process	nurse_upregulated_genes	underrepresented
GO:0033013	0.007976528	6.56969697	0.8567764	4	12	tetrapyrrole metabolic process	nurse_upregulated_genes	underrepresented
GO:0009056	0.008342203	1.671226572	20.7768277	32	291	catabolic process	nurse_upregulated_genes	underrepresented
GO:0006796	0.009252283	1.479341317	39.62590851	54	555	phosphate-containing compound metabolic process	nurse_upregulated_genes	underrepresented
GO:0044765	0.009787964	1.429806076	49.47883711	65	693	single-organism transport	nurse_upregulated_genes	underrepresented
GO:0008302	0.010167979	9.833836858	0.499786233	3	7	female germline ring canal formation, actin assembly	nurse_upregulated_genes	underrepresented
GO:0042168	0.010167979	9.833836858	0.499786233	3	7	heme metabolic process	nurse_upregulated_genes	underrepresented
GO:1901566	0.010606805	1.884812057	11.5664814	20	162	organonitrogen compound biosynthetic process	nurse_upregulated_genes	underrepresented
GO:0051186	0.011482561	2.547483381	4.426678068	10	62	cofactor metabolic process	nurse_upregulated_genes	underrepresented
GO:0055085	0.014235226	1.703136037	15.8503634	25	222	transmembrane transport	nurse_upregulated_genes	underrepresented
GO:0002683	0.014395389	5.253333333	0.999572467	4	14	negative regulation of immune system process	nurse_upregulated_genes	underrepresented
GO:0046845	0.014528644	26.1626506	0.2141941	2	3	branched duct epithelial cell fate determination, open tracheal system	nurse_upregulated_genes	underrepresented
GO:0009133	0.014528644	26.1626506	0.2141941	2	3	nucleoside diphosphate biosynthetic process	nurse_upregulated_genes	underrepresented
GO:0009136	0.014528644	26.1626506	0.2141941	2	3	purine nucleoside diphosphate biosynthetic process	nurse_upregulated_genes	underrepresented
GO:0046843	0.015417457	7.865256798	0.571184267	3	8	dorsal appendage formation	nurse_upregulated_genes	underrepresented
GO:0035158	0.015417457	7.865256798	0.571184267	3	8	regulation of tube diameter, open tracheal system	nurse_upregulated_genes	underrepresented
GO:0035296	0.015417457	7.865256798	0.571184267	3	8	regulation of tube diameter	nurse_upregulated_genes	underrepresented
GO:0044711	0.016322685	1.602443609	20.1342454	30	282	single-organism biosynthetic process	nurse_upregulated_genes	underrepresented
GO:1901137	0.016503104	1.936649514	8.996152202	16	126	carbohydrate derivative biosynthetic process	nurse_upregulated_genes	underrepresented
GO:0006813	0.021238935	2.575490049	3.498503634	8	49	potassium ion transport	nurse_upregulated_genes	underrepresented
GO:0006835	0.021920665	6.552870091	0.6425823	3	9	dicarboxylic acid transport	nurse_upregulated_genes	underrepresented
GO:0042078	0.021920665	6.552870091	0.6425823	3	9	germ-line stem cell division	nurse_upregulated_genes	underrepresented
GO:0016321	0.021920665	6.552870091	0.6425823	3	9	female meiosis chromosome segregation	nurse_upregulated_genes	underrepresented
GO:0006810	0.023581907	1.313647447	70.04147071	85	981	transport	nurse_upregulated_genes	underrepresented
GO:1901136	0.023770684	2.513584575	3.569901667	8	50	carbohydrate derivative catabolic process	nurse_upregulated_genes	underrepresented
GO:0046348	0.02769022	13.07831325	0.285592133	2	4	amino sugar catabolic process	nurse_upregulated_genes	underrepresented
GO:0001522	0.02769022	13.07831325	0.285592133	2	4	pseudouridine synthesis	nurse_upregulated_genes	underrepresented
GO:1901072	0.02769022	13.07831325	0.285592133	2	4	glucosamine-containing compound catabolic process	nurse_upregulated_genes	underrepresented
GO:0018149	0.02769022	13.07831325	0.285592133	2	4	peptide cross-linking	nurse_upregulated_genes	underrepresented
GO:0030903	0.02769022	13.07831325	0.285592133	2	4	notochord development	nurse_upregulated_genes	underrepresented
GO:0007352	0.02769022	13.07831325	0.285592133	2	4	zygotic specification of dorsal/ventral axis	nurse_upregulated_genes	underrepresented
GO:0007378	0.02769022	13.07831325	0.285592133	2	4	amnioserosa formation	nurse_upregulated_genes	underrepresented
GO:0007313	0.02769022	13.07831325	0.285592133	2	4	maternal specification of dorsal/ventral axis, oocyte, soma encoded	nurse_upregulated_genes	underrepresented
GO:0007458	0.02769022	13.07831325	0.285592133	2	4	progression of morphogenetic furrow involved in compound eye morphogenesis	nurse_upregulated_genes	underrepresented
GO:0009185	0.02769022	13.07831325	0.285592133	2	4	ribonucleoside diphosphate metabolic process	nurse_upregulated_genes	underrepresented
GO:0009179	0.02769022	13.07831325	0.285592133	2	4	purine ribonucleoside diphosphate metabolic process	nurse_upregulated_genes	underrepresented
GO:0042381	0.02769022	13.07831325	0.285592133	2	4	hemolymph coagulation	nurse_upregulated_genes	underrepresented
GO:0006032	0.02769022	13.07831325	0.285592133	2	4	chitin catabolic process	nurse_upregulated_genes	underrepresented
GO:0035221	0.02769022	13.07831325	0.285592133	2	4	genital disc pattern formation	nurse_upregulated_genes	underrepresented
GO:0035224	0.02769022	13.07831325	0.285592133	2	4	genital disc anterior/posterior pattern formation	nurse_upregulated_genes	underrepresented
GO:0035217	0.02769022	13.07831325	0.285592133	2	4	labial disc development	nurse_upregulated_genes	underrepresented
GO:0006108	0.02769022	13.07831325	0.285592133	2	4	malate metabolic process	nurse_upregulated_genes	underrepresented
GO:0090407	0.027701116	1.84430512	8.781958102	15	123	organophosphate biosynthetic process	nurse_upregulated_genes	underrepresented
GO:0005976	0.028890263	4.038228438	1.213766567	4	17	polysaccharide metabolic process	nurse_upregulated_genes	underrepresented
GO:0045610	0.028890263	4.038228438	1.213766567	4	17	regulation of hemocyte differentiation	nurse_upregulated_genes	underrepresented
GO:0007301	0.029689177	5.615451014	0.713980333	3	10	female germline ring canal formation	nurse_upregulated_genes	underrepresented
GO:0051234	0.030481152	1.29238478	71.75502351	86	1005	establishment of localization	nurse_upregulated_genes	underrepresented
GO:0046434	0.030765102	2.561671764	3.070115434	7	43	organophosphate catabolic process	nurse_upregulated_genes	underrepresented
GO:0030725	0.038711251	4.912386707	0.785378367	3	11	germline ring canal formation	nurse_upregulated_genes	underrepresented
GO:0043063	0.038711251	4.912386707	0.785378367	3	11	intercellular bridge organization	nurse_upregulated_genes	underrepresented
GO:0035152	0.039506889	2.98563139	1.9277469	5	27	regulation of tube architecture, open tracheal system	nurse_upregulated_genes	underrepresented
GO:0046700	0.042251068	2.000561167	5.426250534	10	76	heterocycle catabolic process	nurse_upregulated_genes	underrepresented
GO:0034032	0.043992477	8.71686747	0.356990167	2	5	purine nucleoside bisphosphate metabolic process	nurse_upregulated_genes	underrepresented
GO:0003156	0.043992477	8.71686747	0.356990167	2	5	regulation of organ formation	nurse_upregulated_genes	underrepresented
GO:0046663	0.043992477	8.71686747	0.356990167	2	5	dorsal closure, leading edge cell differentiation	nurse_upregulated_genes	underrepresented
GO:0046605	0.043992477	8.71686747	0.356990167	2	5	regulation of centrosome cycle	nurse_upregulated_genes	underrepresented
GO:0009065	0.043992477	8.71686747	0.356990167	2	5	glutamine family amino acid catabolic process	nurse_upregulated_genes	underrepresented
GO:0048100	0.043992477	8.71686747	0.356990167	2	5	wing disc anterior/posterior pattern formation	nurse_upregulated_genes	underrepresented
GO:0035026	0.043992477	8.71686747	0.356990167	2	5	leading edge cell differentiation	nurse_upregulated_genes	underrepresented
GO:0007473	0.043992477	8.71686747	0.356990167	2	5	wing disc proximal/distal pattern formation	nurse_upregulated_genes	underrepresented
GO:0045704	0.043992477	8.71686747	0.356990167	2	5	regulation of salivary gland boundary specification	nurse_upregulated_genes	underrepresented
GO:0045705	0.043992477	8.71686747	0.356990167	2	5	negative regulation of salivary gland boundary specification	nurse_upregulated_genes	underrepresented
GO:0009135	0.043992477	8.71686747	0.356990167	2	5	purine nucleoside diphosphate metabolic process	nurse_upregulated_genes	underrepresented
GO:0040010	0.043992477	8.71686747	0.356990167	2	5	positive regulation of growth rate	nurse_upregulated_genes	underrepresented
GO:0040009	0.043992477	8.71686747	0.356990167	2	5	regulation of growth rate	nurse_upregulated_genes	underrepresented
GO:0048636	0.043992477	8.71686747	0.356990167	2	5	positive regulation of muscle organ development	nurse_upregulated_genes	underrepresented
GO:0015936	0.043992477	8.71686747	0.356990167	2	5	coenzyme A metabolic process	nurse_upregulated_genes	underrepresented
GO:0035159	0.043992477	8.71686747	0.356990167	2	5	regulation of tube length, open tracheal system	nurse_upregulated_genes	underrepresented
GO:0035263	0.043992477	8.71686747	0.356990167	2	5	genital disc sexually dimorphic development	nurse_upregulated_genes	underrepresented
GO:0010824	0.043992477	8.71686747	0.356990167	2	5	regulation of centrosome duplication	nurse_upregulated_genes	underrepresented
GO:0033865	0.043992477	8.71686747	0.356990167	2	5	nucleoside bisphosphate metabolic process	nurse_upregulated_genes	underrepresented
GO:0033875	0.043992477	8.71686747	0.356990167	2	5	ribonucleoside bisphosphate metabolic process	nurse_upregulated_genes	underrepresented
GO:0043062	0.049715598	3.278787879	1.427960667	4	20	extracellular structure organization	nurse_upregulated_genes	underrepresented
