# Supplementary material for: Genes associated with ant social behavior show distinct transcriptional and evolutionary patterns
Source: eLife journal article supplement (doi:10.7554/elife.04775), 2015-01-26
Supplement: supp [file elife-04775-supp-v1.zip › elife_poa_e04775_Supplementary_File_4.csv]

GOBPID	Pvalue	OddsRatio	ExpCount	Count	Size	GOTerm	ModuleNumber	ModuleColor
GO:0055114	4.08856348579009e-07	2.99643874643875	13.6276186404446	34	255	oxidation-reduction process	1	saddlebrown
GO:0006091	5.7035371068972e-07	4.83029556650246	4.70286447199658	18	88	generation of precursor metabolites and energy	1	saddlebrown
GO:0015980	6.54679165762667e-06	5.98364751305928	2.61864044463446	12	49	energy derivation by oxidation of organic compounds	1	saddlebrown
GO:0045333	8.11853209616324e-05	6.08713692946058	1.92389910218042	9	36	cellular respiration	1	saddlebrown
GO:0015992	9.57333926999939e-05	6.93742621015348	1.54980761008978	8	29	proton transport	1	saddlebrown
GO:0009060	9.77117618415883e-05	8.47489711934156	1.17571611799914	7	22	aerobic respiration	1	saddlebrown
GO:0006818	0.000124591271593208	6.6205860255447	1.60324925181702	8	30	hydrogen transport	1	saddlebrown
GO:0046168	0.000150899898175798	Inf	0.160324925181702	3	3	glycerol-3-phosphate catabolic process	1	saddlebrown
GO:0044710	0.000163122630045204	1.71816418875242	51.2505344164173	75	959	single-organism metabolic process	1	saddlebrown
GO:0006754	0.000238775607915446	5.1301867219917	2.19110731081659	9	41	ATP biosynthetic process	1	saddlebrown
GO:0046034	0.000238775607915446	5.1301867219917	2.19110731081659	9	41	ATP metabolic process	1	saddlebrown
GO:1902600	0.00031341792884301	6.68464370803552	1.38948268490808	7	26	hydrogen ion transmembrane transport	1	saddlebrown
GO:0015985	0.00031341792884301	6.68464370803552	1.38948268490808	7	26	energy coupled proton transport, down electrochemical gradient	1	saddlebrown
GO:0015986	0.00031341792884301	6.68464370803552	1.38948268490808	7	26	ATP synthesis coupled proton transport	1	saddlebrown
GO:0006099	0.000330099476860842	8.35119798234552	1.01539119281744	6	19	tricarboxylic acid cycle	1	saddlebrown
GO:0009145	0.000419657559325668	4.68725548310611	2.35143223599829	9	44	purine nucleoside triphosphate biosynthetic process	1	saddlebrown
GO:0009206	0.000419657559325668	4.68725548310611	2.35143223599829	9	44	purine ribonucleoside triphosphate biosynthetic process	1	saddlebrown
GO:0009142	0.000593753697893179	4.43187170573063	2.45831551945276	9	46	nucleoside triphosphate biosynthetic process	1	saddlebrown
GO:0009201	0.000593753697893179	4.43187170573063	2.45831551945276	9	46	ribonucleoside triphosphate biosynthetic process	1	saddlebrown
GO:0034220	0.000647833306175507	5.76917321361766	1.54980761008978	7	29	ion transmembrane transport	1	saddlebrown
GO:0009168	0.000700741668847248	4.3142607556235	2.51175716117999	9	47	purine ribonucleoside monophosphate biosynthetic process	1	saddlebrown
GO:0009127	0.000700741668847248	4.3142607556235	2.51175716117999	9	47	purine nucleoside monophosphate biosynthetic process	1	saddlebrown
GO:0009167	0.000822966076528774	4.20268113629109	2.56519880290723	9	48	purine ribonucleoside monophosphate metabolic process	1	saddlebrown
GO:0009126	0.000822966076528774	4.20268113629109	2.56519880290723	9	48	purine nucleoside monophosphate metabolic process	1	saddlebrown
GO:0015672	0.00115618993635938	2.73456920160101	6.19923044035913	15	116	monovalent inorganic cation transport	1	saddlebrown
GO:0046129	0.00129726394871566	3.89982216953171	2.72552372808893	9	51	purine ribonucleoside biosynthetic process	1	saddlebrown
GO:0042451	0.00129726394871566	3.89982216953171	2.72552372808893	9	51	purine nucleoside biosynthetic process	1	saddlebrown
GO:0009156	0.00149710342597785	3.80826015632539	2.77896536981616	9	52	ribonucleoside monophosphate biosynthetic process	1	saddlebrown
GO:0009161	0.00172097343740203	3.72086005281026	2.83240701154339	9	53	ribonucleoside monophosphate metabolic process	1	saddlebrown
GO:0009124	0.00172097343740203	3.72086005281026	2.83240701154339	9	53	nucleoside monophosphate biosynthetic process	1	saddlebrown
GO:0009163	0.00197090326272062	3.63734439834025	2.88584865327063	9	54	nucleoside biosynthetic process	1	saddlebrown
GO:0009123	0.00197090326272062	3.63734439834025	2.88584865327063	9	54	nucleoside monophosphate metabolic process	1	saddlebrown
GO:1901659	0.00197090326272062	3.63734439834025	2.88584865327063	9	54	glycosyl compound biosynthetic process	1	saddlebrown
GO:0042455	0.00197090326272062	3.63734439834025	2.88584865327063	9	54	ribonucleoside biosynthetic process	1	saddlebrown
GO:0009152	0.0023602635621391	3.25297619047619	3.52714835399743	10	66	purine ribonucleotide biosynthetic process	1	saddlebrown
GO:0007425	0.00267411353317013	17.914979757085	0.320649850363403	3	6	epithelial cell fate determination, open tracheal system	1	saddlebrown
GO:0006072	0.00267411353317013	17.914979757085	0.320649850363403	3	6	glycerol-3-phosphate metabolic process	1	saddlebrown
GO:0048570	0.00284519324141142	Inf	0.106883283454468	2	2	notochord morphogenesis	1	saddlebrown
GO:0015979	0.00284519324141142	Inf	0.106883283454468	2	2	photosynthesis	1	saddlebrown
GO:0019684	0.00284519324141142	Inf	0.106883283454468	2	2	photosynthesis, light reaction	1	saddlebrown
GO:0006164	0.00296090800473918	3.13936781609195	3.6340316374519	10	68	purine nucleotide biosynthetic process	1	saddlebrown
GO:0046390	0.00367781756084399	3.03333333333333	3.74091492090637	10	70	ribose phosphate biosynthetic process	1	saddlebrown
GO:0009260	0.00367781756084399	3.03333333333333	3.74091492090637	10	70	ribonucleotide biosynthetic process	1	saddlebrown
GO:0072522	0.00408454669231711	2.98292349726776	3.7943565626336	10	71	purine-containing compound biosynthetic process	1	saddlebrown
GO:0008302	0.00449571382085642	13.4331983805668	0.374091492090637	3	7	female germline ring canal formation, actin assembly	1	saddlebrown
GO:0052646	0.00449571382085642	13.4331983805668	0.374091492090637	3	7	alditol phosphate metabolic process	1	saddlebrown
GO:0006812	0.00477959026025951	2.0856524427953	9.99358700299273	19	187	cation transport	1	saddlebrown
GO:0009117	0.00483469355608858	2.24283943367913	7.85592133390338	16	147	nucleotide metabolic process	1	saddlebrown
GO:0044699	0.00483602707925218	1.44451875545217	154.392902949979	174	2889	single-organism process	1	saddlebrown
GO:0030708	0.00691109886513253	10.7441295546559	0.427533133817871	3	8	germarium-derived female germ-line cyst encapsulation	1	saddlebrown
GO:0048138	0.00691109886513253	10.7441295546559	0.427533133817871	3	8	germ-line cyst encapsulation	1	saddlebrown
GO:0048139	0.00691109886513253	10.7441295546559	0.427533133817871	3	8	female germ-line cyst encapsulation	1	saddlebrown
GO:0048580	0.00691109886513253	10.7441295546559	0.427533133817871	3	8	regulation of post-embryonic development	1	saddlebrown
GO:0045611	0.00691109886513253	10.7441295546559	0.427533133817871	3	8	negative regulation of hemocyte differentiation	1	saddlebrown
GO:0045613	0.00691109886513253	10.7441295546559	0.427533133817871	3	8	regulation of plasmatocyte differentiation	1	saddlebrown
GO:0045614	0.00691109886513253	10.7441295546559	0.427533133817871	3	8	negative regulation of plasmatocyte differentiation	1	saddlebrown
GO:0035203	0.00691109886513253	10.7441295546559	0.427533133817871	3	8	regulation of lamellocyte differentiation	1	saddlebrown
GO:0035204	0.00691109886513253	10.7441295546559	0.427533133817871	3	8	negative regulation of lamellocyte differentiation	1	saddlebrown
GO:0022900	0.00770403696784285	4.73576799140709	1.28259940145361	5	24	electron transport chain	1	saddlebrown
GO:0006753	0.00804637465723895	2.10981983643854	8.28345446772125	16	155	nucleoside phosphate metabolic process	1	saddlebrown
GO:0046845	0.00823377992788268	35.7016129032258	0.160324925181702	2	3	branched duct epithelial cell fate determination, open tracheal system	1	saddlebrown
GO:0072148	0.00823377992788268	35.7016129032258	0.160324925181702	2	3	epithelial cell fate commitment	1	saddlebrown
GO:0061525	0.00870268106673259	5.98373983739837	0.855066267635742	4	16	hindgut development	1	saddlebrown
GO:0007442	0.00870268106673259	5.98373983739837	0.855066267635742	4	16	hindgut morphogenesis	1	saddlebrown
GO:1901135	0.00917971697587631	1.90808740707367	11.3830696879008	20	213	carbohydrate derivative metabolic process	1	saddlebrown
GO:0010002	0.00996127675259387	8.95141700404858	0.480974775545105	3	9	cardioblast differentiation	1	saddlebrown
GO:0048542	0.00996127675259387	8.95141700404858	0.480974775545105	3	9	lymph gland development	1	saddlebrown
GO:0042387	0.00996127675259387	8.95141700404858	0.480974775545105	3	9	plasmatocyte differentiation	1	saddlebrown
GO:0035171	0.00996127675259387	8.95141700404858	0.480974775545105	3	9	lamellocyte differentiation	1	saddlebrown
GO:0009116	0.0109020205734416	2.40938649997479	5.02351432235998	11	94	nucleoside metabolic process	1	saddlebrown
GO:1901657	0.0109020205734416	2.40938649997479	5.02351432235998	11	94	glycosyl compound metabolic process	1	saddlebrown
GO:0009144	0.0114546135684299	2.67349159921094	3.74091492090637	9	70	purine nucleoside triphosphate metabolic process	1	saddlebrown
GO:0009205	0.0114546135684299	2.67349159921094	3.74091492090637	9	70	purine ribonucleoside triphosphate metabolic process	1	saddlebrown
GO:0051606	0.0128413236795782	4.08719851576994	1.44292432663531	5	27	detection of stimulus	1	saddlebrown
GO:0009199	0.0136670918402485	2.58743331357439	3.84779820436084	9	72	ribonucleoside triphosphate metabolic process	1	saddlebrown
GO:0007301	0.0136754700507974	7.67090803932909	0.534416417272339	3	10	female germline ring canal formation	1	saddlebrown
GO:0035051	0.0136754700507974	7.67090803932909	0.534416417272339	3	10	cardiocyte differentiation	1	saddlebrown
GO:0035168	0.0136754700507974	7.67090803932909	0.534416417272339	3	10	larval lymph gland hemocyte differentiation	1	saddlebrown
GO:0019637	0.0144812581311684	1.8447742733457	11.1158614792646	19	208	organophosphate metabolic process	1	saddlebrown
GO:0009141	0.014885291303636	2.54642116182573	3.90123984608807	9	73	nucleoside triphosphate metabolic process	1	saddlebrown
GO:0018149	0.0158878783003987	17.8467741935484	0.213766566908935	2	4	peptide cross-linking	1	saddlebrown
GO:0030903	0.0158878783003987	17.8467741935484	0.213766566908935	2	4	notochord development	1	saddlebrown
GO:0007378	0.0158878783003987	17.8467741935484	0.213766566908935	2	4	amnioserosa formation	1	saddlebrown
GO:0007313	0.0158878783003987	17.8467741935484	0.213766566908935	2	4	maternal specification of dorsal/ventral axis, oocyte, soma encoded	1	saddlebrown
GO:0007458	0.0158878783003987	17.8467741935484	0.213766566908935	2	4	progression of morphogenetic furrow involved in compound eye morphogenesis	1	saddlebrown
GO:0042381	0.0158878783003987	17.8467741935484	0.213766566908935	2	4	hemolymph coagulation	1	saddlebrown
GO:0035221	0.0158878783003987	17.8467741935484	0.213766566908935	2	4	genital disc pattern formation	1	saddlebrown
GO:0035224	0.0158878783003987	17.8467741935484	0.213766566908935	2	4	genital disc anterior/posterior pattern formation	1	saddlebrown
GO:0035217	0.0158878783003987	17.8467741935484	0.213766566908935	2	4	labial disc development	1	saddlebrown
GO:0006108	0.0158878783003987	17.8467741935484	0.213766566908935	2	4	malate metabolic process	1	saddlebrown
GO:0009150	0.0168802532125491	2.24385313337408	5.34416417272339	11	100	purine ribonucleotide metabolic process	1	saddlebrown
GO:0009165	0.0180508939856264	2.32371794871795	4.70286447199658	10	88	nucleotide biosynthetic process	1	saddlebrown
GO:0001703	0.0180725481815166	6.71052631578947	0.587858058999572	3	11	gastrulation with mouth forming first	1	saddlebrown
GO:0030725	0.0180725481815166	6.71052631578947	0.587858058999572	3	11	germline ring canal formation	1	saddlebrown
GO:0043063	0.0180725481815166	6.71052631578947	0.587858058999572	3	11	intercellular bridge organization	1	saddlebrown
GO:0010004	0.0180725481815166	6.71052631578947	0.587858058999572	3	11	gastrulation involving germ band extension	1	saddlebrown
GO:0005975	0.0185954901312646	1.99284957627119	7.58871312526721	14	142	carbohydrate metabolic process	1	saddlebrown
GO:0043062	0.0195873382204888	4.48373983739837	1.06883283454468	4	20	extracellular structure organization	1	saddlebrown
GO:0008340	0.0199043156219758	3.59428571428571	1.60324925181702	5	30	determination of adult lifespan	1	saddlebrown
GO:0010259	0.0199043156219758	3.59428571428571	1.60324925181702	5	30	multicellular organismal aging	1	saddlebrown
GO:0055086	0.0204691313441697	1.8724523339908	9.19196237708422	16	172	nucleobase-containing small molecule metabolic process	1	saddlebrown
GO:0009259	0.0206594159402302	2.16918319083136	5.50448909790509	11	103	ribonucleotide metabolic process	1	saddlebrown
GO:0019693	0.0206594159402302	2.16918319083136	5.50448909790509	11	103	ribose phosphate metabolic process	1	saddlebrown
GO:0019318	0.0214809743739812	2.74414027554124	2.83240701154339	7	53	hexose metabolic process	1	saddlebrown
GO:0007186	0.0231245554667192	1.9306625577812	7.80247969217614	14	146	G-protein coupled receptor signaling pathway	1	saddlebrown
GO:0048546	0.0232066563953691	4.21903395504543	1.12227447627191	4	21	digestive tract morphogenesis	1	saddlebrown
GO:0005996	0.0235953036697464	2.6851414061816	2.88584865327063	7	54	monosaccharide metabolic process	1	saddlebrown
GO:0006163	0.0250298747108533	2.09922924465977	5.66481402308679	11	106	purine nucleotide metabolic process	1	saddlebrown
GO:0046434	0.0253437115689979	2.91825431989366	2.29799059427106	6	43	organophosphate catabolic process	1	saddlebrown
GO:0006006	0.0253437115689979	2.91825431989366	2.29799059427106	6	43	glucose metabolic process	1	saddlebrown
GO:0003156	0.0255518461785205	11.8951612903226	0.267208208636169	2	5	regulation of organ formation	1	saddlebrown
GO:0046663	0.0255518461785205	11.8951612903226	0.267208208636169	2	5	dorsal closure, leading edge cell differentiation	1	saddlebrown
GO:0048100	0.0255518461785205	11.8951612903226	0.267208208636169	2	5	wing disc anterior/posterior pattern formation	1	saddlebrown
GO:0035026	0.0255518461785205	11.8951612903226	0.267208208636169	2	5	leading edge cell differentiation	1	saddlebrown
GO:0007473	0.0255518461785205	11.8951612903226	0.267208208636169	2	5	wing disc proximal/distal pattern formation	1	saddlebrown
GO:0045704	0.0255518461785205	11.8951612903226	0.267208208636169	2	5	regulation of salivary gland boundary specification	1	saddlebrown
GO:0045705	0.0255518461785205	11.8951612903226	0.267208208636169	2	5	negative regulation of salivary gland boundary specification	1	saddlebrown
GO:0007229	0.0255518461785205	11.8951612903226	0.267208208636169	2	5	integrin-mediated signaling pathway	1	saddlebrown
GO:0048636	0.0255518461785205	11.8951612903226	0.267208208636169	2	5	positive regulation of muscle organ development	1	saddlebrown
GO:0035263	0.0255518461785205	11.8951612903226	0.267208208636169	2	5	genital disc sexually dimorphic development	1	saddlebrown
GO:1901293	0.025619302071607	2.18122489959839	4.97007268063275	10	93	nucleoside phosphate biosynthetic process	1	saddlebrown
GO:0006811	0.0263146369099042	1.59722222222222	16.7272338606242	25	313	ion transport	1	saddlebrown
GO:0009582	0.0272061441659574	3.98373983739837	1.17571611799914	4	22	detection of abiotic stimulus	1	saddlebrown
GO:0044281	0.0274773888397207	1.51663405088063	21.8576314664386	31	409	small molecule metabolic process	1	saddlebrown
GO:0005977	0.0289467396422135	5.36599190283401	0.69474134245404	3	13	glycogen metabolic process	1	saddlebrown
GO:0006073	0.0289467396422135	5.36599190283401	0.69474134245404	3	13	cellular glucan metabolic process	1	saddlebrown
GO:0006112	0.0289467396422135	5.36599190283401	0.69474134245404	3	13	energy reserve metabolic process	1	saddlebrown
GO:0044042	0.0289467396422135	5.36599190283401	0.69474134245404	3	13	glucan metabolic process	1	saddlebrown
GO:0046128	0.0296912741126359	2.22787472290115	4.38221462163318	9	82	purine ribonucleoside metabolic process	1	saddlebrown
GO:0042278	0.0296912741126359	2.22787472290115	4.38221462163318	9	82	purine nucleoside metabolic process	1	saddlebrown
GO:0008355	0.0315924516300387	3.7732135216089	1.22915775972638	4	23	olfactory learning	1	saddlebrown
GO:0009581	0.0315924516300387	3.7732135216089	1.22915775972638	4	23	detection of external stimulus	1	saddlebrown
GO:0044723	0.0318563198467463	2.01255230125523	5.87858058999572	11	110	single-organism carbohydrate metabolic process	1	saddlebrown
GO:0006836	0.0334814206544324	2.4722827402566	3.09961522017956	7	58	neurotransmitter transport	1	saddlebrown
GO:0002683	0.0354209092174169	4.87707029812293	0.748182984181274	3	14	negative regulation of immune system process	1	saddlebrown
GO:0007602	0.0354209092174169	4.87707029812293	0.748182984181274	3	14	phototransduction	1	saddlebrown
GO:0009119	0.0363563476364971	2.13845817864163	4.54253954681488	9	85	ribonucleoside metabolic process	1	saddlebrown
GO:0008306	0.0363701345624778	3.58373983739837	1.28259940145361	4	24	associative learning	1	saddlebrown
GO:0007568	0.0365585004541312	2.99183673469388	1.87045746045319	5	35	aging	1	saddlebrown
GO:0001570	0.0369907125011956	8.91935483870968	0.320649850363403	2	6	vasculogenesis	1	saddlebrown
GO:0007354	0.0369907125011956	8.91935483870968	0.320649850363403	2	6	zygotic determination of anterior/posterior axis, embryo	1	saddlebrown
GO:0007448	0.0369907125011956	8.91935483870968	0.320649850363403	2	6	anterior/posterior pattern specification, imaginal disc	1	saddlebrown
GO:0043966	0.0369907125011956	8.91935483870968	0.320649850363403	2	6	histone H3 acetylation	1	saddlebrown
GO:0072521	0.0377809419046456	1.9520059069653	6.03890551517743	11	113	purine-containing compound metabolic process	1	saddlebrown
GO:0030707	0.0393279818872525	2.3779020110257	3.20649850363403	7	60	ovarian follicle cell development	1	saddlebrown
GO:0007612	0.0471078394767827	3.25646711012565	1.38948268490808	4	26	learning	1	saddlebrown
GO:1901566	0.0497140226224295	1.71552908841044	8.65754595981189	14	162	organonitrogen compound biosynthetic process	1	saddlebrown
GO:0044724	0.0497169314829059	2.71799628942486	2.03078238563489	5	38	single-organism carbohydrate catabolic process	1	saddlebrown
GO:0016052	0.0497169314829059	2.71799628942486	2.03078238563489	5	38	carbohydrate catabolic process	1	saddlebrown
GO:0050821	0.0499887119733313	7.13387096774194	0.374091492090637	2	7	protein stabilization	1	saddlebrown
GO:0035309	0.0499887119733313	7.13387096774194	0.374091492090637	2	7	wing and notum subfield formation	1	saddlebrown
GOBPID	Pvalue	OddsRatio	ExpCount	Count	Size	GOTerm	ModuleNumber	ModuleColor
GO:0006030	4.87933494220362e-07	19.928125	0.52607952116289	7	23	chitin metabolic process	2	salmon
GO:1901071	9.21295247565472e-07	17.7061111111111	0.571825566481402	7	25	glucosamine-containing compound metabolic process	2	salmon
GO:0006040	9.21295247565472e-07	17.7061111111111	0.571825566481402	7	25	amino sugar metabolic process	2	salmon
GO:0006022	2.26410397511647e-05	9.9290625	0.892047883710988	7	39	aminoglycan metabolic process	2	salmon
GO:0046348	0.00301803071727203	43.5142857142857	0.0914920906370244	2	4	amino sugar catabolic process	2	salmon
GO:1901072	0.00301803071727203	43.5142857142857	0.0914920906370244	2	4	glucosamine-containing compound catabolic process	2	salmon
GO:0006032	0.00301803071727203	43.5142857142857	0.0914920906370244	2	4	chitin catabolic process	2	salmon
GO:0035159	0.00495501367901237	29.0031746031746	0.11436511329628	2	5	regulation of tube length, open tracheal system	2	salmon
GO:0007424	0.00842243698139973	3.71204620462046	1.78409576742198	6	78	open tracheal system development	2	salmon
GO:0046716	0.0100981971153284	17.3942857142857	0.160111158614793	2	7	muscle cell cellular homeostasis	2	salmon
GO:0044282	0.0115035735300649	5.03300970873786	0.892047883710988	4	39	small molecule catabolic process	2	salmon
GO:1901565	0.01261586958489	3.37786690061411	1.94420692603677	6	85	organonitrogen compound catabolic process	2	salmon
GO:0048580	0.0132644702850091	14.4920634920635	0.182984181274049	2	8	regulation of post-embryonic development	2	salmon
GO:0045611	0.0132644702850091	14.4920634920635	0.182984181274049	2	8	negative regulation of hemocyte differentiation	2	salmon
GO:0045613	0.0132644702850091	14.4920634920635	0.182984181274049	2	8	regulation of plasmatocyte differentiation	2	salmon
GO:0045614	0.0132644702850091	14.4920634920635	0.182984181274049	2	8	negative regulation of plasmatocyte differentiation	2	salmon
GO:0035203	0.0132644702850091	14.4920634920635	0.182984181274049	2	8	regulation of lamellocyte differentiation	2	salmon
GO:0035204	0.0132644702850091	14.4920634920635	0.182984181274049	2	8	negative regulation of lamellocyte differentiation	2	salmon
GO:1901564	0.014623306774738	2.02250414382252	8.14279606669517	15	356	organonitrogen compound metabolic process	2	salmon
GO:0008355	0.0147720884720647	6.56394230769231	0.52607952116289	3	23	olfactory learning	2	salmon
GO:0060541	0.0155809359830725	3.21221519742336	2.03569901667379	6	89	respiratory system development	2	salmon
GO:0008306	0.0166064035091405	6.25	0.548952543822146	3	24	associative learning	2	salmon
GO:0050804	0.0166064035091405	6.25	0.548952543822146	3	24	regulation of synaptic transmission	2	salmon
GO:1901606	0.0166064035091405	6.25	0.548952543822146	3	24	alpha-amino acid catabolic process	2	salmon
GO:0042387	0.0168017078548085	12.4190476190476	0.205857203933305	2	9	plasmatocyte differentiation	2	salmon
GO:0035171	0.0168017078548085	12.4190476190476	0.205857203933305	2	9	lamellocyte differentiation	2	salmon
GO:0009063	0.0185627577894142	5.9645979020979	0.571825566481402	3	25	cellular amino acid catabolic process	2	salmon
GO:0007612	0.020641700692302	5.70401337792642	0.594698589140658	3	26	learning	2	salmon
GO:0035168	0.0206916085406373	10.8642857142857	0.228730226592561	2	10	larval lymph gland hemocyte differentiation	2	salmon
GO:0035152	0.0228435389731549	5.46514423076923	0.617571611799914	3	27	regulation of tube architecture, open tracheal system	2	salmon
GO:0071545	0.0228730226592559	Inf	0.0228730226592561	1	1	inositol phosphate catabolic process	2	salmon
GO:0010977	0.0228730226592559	Inf	0.0228730226592561	1	1	negative regulation of neuron projection development	2	salmon
GO:0018022	0.0228730226592559	Inf	0.0228730226592561	1	1	peptidyl-lysine methylation	2	salmon
GO:0018023	0.0228730226592559	Inf	0.0228730226592561	1	1	peptidyl-lysine trimethylation	2	salmon
GO:0018027	0.0228730226592559	Inf	0.0228730226592561	1	1	peptidyl-lysine dimethylation	2	salmon
GO:0046855	0.0228730226592559	Inf	0.0228730226592561	1	1	inositol phosphate dephosphorylation	2	salmon
GO:0046838	0.0228730226592559	Inf	0.0228730226592561	1	1	phosphorylated carbohydrate dephosphorylation	2	salmon
GO:0043171	0.0228730226592559	Inf	0.0228730226592561	1	1	peptide catabolic process	2	salmon
GO:0034770	0.0228730226592559	Inf	0.0228730226592561	1	1	histone H4-K20 methylation	2	salmon
GO:0034772	0.0228730226592559	Inf	0.0228730226592561	1	1	histone H4-K20 dimethylation	2	salmon
GO:0034773	0.0228730226592559	Inf	0.0228730226592561	1	1	histone H4-K20 trimethylation	2	salmon
GO:0035001	0.0228730226592559	Inf	0.0228730226592561	1	1	dorsal trunk growth, open tracheal system	2	salmon
GO:0031581	0.0228730226592559	Inf	0.0228730226592561	1	1	hemidesmosome assembly	2	salmon
GO:0043647	0.0228730226592559	Inf	0.0228730226592561	1	1	inositol phosphate metabolic process	2	salmon
GO:0060350	0.0228730226592559	Inf	0.0228730226592561	1	1	endochondral bone morphogenesis	2	salmon
GO:0060439	0.0228730226592559	Inf	0.0228730226592561	1	1	trachea morphogenesis	2	salmon
GO:0035235	0.0228730226592559	Inf	0.0228730226592561	1	1	ionotropic glutamate receptor signaling pathway	2	salmon
GO:0010815	0.0228730226592559	Inf	0.0228730226592561	1	1	bradykinin catabolic process	2	salmon
GO:0007016	0.0249165006737033	9.65502645502646	0.251603249251817	2	11	cytoskeletal anchoring at plasma membrane	2	salmon
GO:0048167	0.0249165006737033	9.65502645502646	0.251603249251817	2	11	regulation of synaptic plasticity	2	salmon
GO:0060538	0.0251683507031229	5.24538461538462	0.640444634459171	3	28	skeletal muscle organ development	2	salmon
GO:0006026	0.0294593234082549	8.68761904761905	0.274476271911073	2	12	aminoglycan catabolic process	2	salmon
GO:0035151	0.0294593234082549	8.68761904761905	0.274476271911073	2	12	regulation of tube size, open tracheal system	2	salmon
GO:0045214	0.0343036084471722	7.8961038961039	0.297349294570329	2	13	sarcomere organization	2	salmon
GO:0046395	0.0386253748123312	4.36634615384615	0.754809747755451	3	33	carboxylic acid catabolic process	2	salmon
GO:0016054	0.0386253748123312	4.36634615384615	0.754809747755451	3	33	organic acid catabolic process	2	salmon
GO:0016203	0.0394334622718778	7.23650793650794	0.320222317229585	2	14	muscle attachment	2	salmon
GO:0002683	0.0394334622718778	7.23650793650794	0.320222317229585	2	14	negative regulation of immune system process	2	salmon
GO:0035150	0.0448335488633751	6.67838827838828	0.343095339888841	2	15	regulation of tube size	2	salmon
GO:0006552	0.0452276488246315	43.1132075471698	0.0457460453185122	1	2	leucine catabolic process	2	salmon
GO:0046174	0.0452276488246315	43.1132075471698	0.0457460453185122	1	2	polyol catabolic process	2	salmon
GO:0009083	0.0452276488246315	43.1132075471698	0.0457460453185122	1	2	branched-chain amino acid catabolic process	2	salmon
GO:0045467	0.0452276488246315	43.1132075471698	0.0457460453185122	1	2	R7 cell development	2	salmon
GO:0045199	0.0452276488246315	43.1132075471698	0.0457460453185122	1	2	maintenance of epithelial cell apical/basal polarity	2	salmon
GO:0035090	0.0452276488246315	43.1132075471698	0.0457460453185122	1	2	maintenance of apical/basal cell polarity	2	salmon
GO:0045751	0.0452276488246315	43.1132075471698	0.0457460453185122	1	2	negative regulation of Toll signaling pathway	2	salmon
GO:0009409	0.0452276488246315	43.1132075471698	0.0457460453185122	1	2	response to cold	2	salmon
GOBPID	Pvalue	OddsRatio	ExpCount	Count	Size	GOTerm	ModuleNumber	ModuleColor
GO:0043687	0.000706310296766655	5.87135969141755	1.60068405301411	7	24	post-translational protein modification	3	black
GO:0008344	0.00113914061341908	4.56947368421053	2.2009405728944	8	33	adult locomotory behavior	3	black
GO:0051656	0.00133535844085264	2.9696342305038	5.06883283454468	13	76	establishment of organelle localization	3	black
GO:0007626	0.00200090901180585	3.15455149501661	4.06840530141086	11	61	locomotory behavior	3	black
GO:0051640	0.00242657456133103	2.74808184143223	5.40230867892262	13	81	organelle localization	3	black
GO:0052128	0.00265636533507441	21.1844660194175	0.333475844377939	3	5	positive energy taxis	3	black
GO:0046956	0.00265636533507441	21.1844660194175	0.333475844377939	3	5	positive phototaxis	3	black
GO:0003013	0.00320957186599237	5.0161476355248	1.53398888413852	6	23	circulatory system process	3	black
GO:0044057	0.00320957186599237	5.0161476355248	1.53398888413852	6	23	regulation of system process	3	black
GO:0001505	0.00384794116490606	3.2955064737243	3.20136810602822	9	48	regulation of neurotransmitter levels	3	black
GO:0007268	0.00430244964139658	2.16632653061225	9.20393330483112	18	138	synaptic transmission	3	black
GO:0000019	0.0044349363951909	Inf	0.133390337751176	2	2	regulation of mitotic recombination	3	black
GO:0007267	0.00544704947515446	2.06387128230132	10.1376656690894	19	152	cell-cell signaling	3	black
GO:0043412	0.00619971628811318	1.53507728894174	36.2821718683198	51	544	macromolecule modification	3	black
GO:0009453	0.00625869222848757	7.07467532467532	0.800342026507054	4	12	energy taxis	3	black
GO:0042331	0.00625869222848757	7.07467532467532	0.800342026507054	4	12	phototaxis	3	black
GO:0007422	0.00727980510145084	3.55573770491803	2.33433091064557	7	35	peripheral nervous system development	3	black
GO:0006468	0.0074455034337397	1.79017664799655	15.8067550235143	26	237	protein phosphorylation	3	black
GO:0007186	0.00778066945465473	2.02710459183673	9.73749465583583	18	146	G-protein coupled receptor signaling pathway	3	black
GO:0044839	0.00840567539333373	10.5873786407767	0.466866182129115	3	7	cell cycle G2/M phase transition	3	black
GO:0006887	0.00853418718817565	3.43233465234596	2.40102607952116	7	36	exocytosis	3	black
GO:0044705	0.00853418718817565	3.43233465234596	2.40102607952116	7	36	multi-organism reproductive behavior	3	black
GO:0019098	0.00853418718817565	3.43233465234596	2.40102607952116	7	36	reproductive behavior	3	black
GO:0042461	0.00853418718817565	3.43233465234596	2.40102607952116	7	36	photoreceptor cell development	3	black
GO:0046777	0.00857231777378653	6.28715728715729	0.867037195382642	4	13	protein autophosphorylation	3	black
GO:0009408	0.00857231777378653	6.28715728715729	0.867037195382642	4	13	response to heat	3	black
GO:0031503	0.00857231777378653	6.28715728715729	0.867037195382642	4	13	protein complex localization	3	black
GO:0007017	0.00920986786318543	1.91191145786084	11.4048738777255	20	171	microtubule-based process	3	black
GO:0046903	0.0100263529928072	2.35232876712329	5.66908935442497	12	85	secretion	3	black
GO:0033057	0.0107679891126224	3.70247229326513	1.93415989739205	6	29	multicellular organismal reproductive behavior	3	black
GO:0032940	0.0112147334125115	2.41814464605162	5.06883283454468	11	76	secretion by cell	3	black
GO:0007413	0.0113814509894624	5.65714285714286	0.93373236425823	4	14	axonal fasciculation	3	black
GO:0007163	0.0119965115725963	2.28853333333333	5.80247969217614	12	87	establishment or maintenance of cell polarity	3	black
GO:0009890	0.0123306707456427	2.38095238095238	5.13552800342026	11	77	negative regulation of biosynthetic process	3	black
GO:0065007	0.0126724792837161	1.31315546606259	118.850790936298	138	1782	biological regulation	3	black
GO:0016572	0.0127167722811633	28.1612903225806	0.200085506626764	2	3	histone phosphorylation	3	black
GO:0018206	0.0127167722811633	28.1612903225806	0.200085506626764	2	3	peptidyl-methionine modification	3	black
GO:0010025	0.0127167722811633	28.1612903225806	0.200085506626764	2	3	wax biosynthetic process	3	black
GO:0007193	0.0127167722811633	28.1612903225806	0.200085506626764	2	3	adenylate cyclase-inhibiting G-protein coupled receptor signaling pathway	3	black
GO:0051591	0.0127167722811633	28.1612903225806	0.200085506626764	2	3	response to cAMP	3	black
GO:0010166	0.0127167722811633	28.1612903225806	0.200085506626764	2	3	wax metabolic process	3	black
GO:0007628	0.0127167722811633	28.1612903225806	0.200085506626764	2	3	adult walking behavior	3	black
GO:0014074	0.0127167722811633	28.1612903225806	0.200085506626764	2	3	response to purine-containing compound	3	black
GO:0042462	0.0127256842735579	3.54738562091503	2.00085506626764	6	30	eye photoreceptor cell development	3	black
GO:0045175	0.0127913728768089	8.46796116504854	0.533561351004703	3	8	basal protein localization	3	black
GO:0051294	0.0127913728768089	8.46796116504854	0.533561351004703	3	8	establishment of spindle orientation	3	black
GO:0030705	0.0131112990474786	4.16650699367695	1.46729371526293	5	22	cytoskeleton-dependent intracellular transport	3	black
GO:0051705	0.014591125300985	2.77599486521181	3.26806327490381	8	49	multi-organism behavior	3	black
GO:0008016	0.0147206093401715	5.14167650531287	1.00042753313382	4	15	regulation of heart contraction	3	black
GO:0044765	0.0163764178711649	1.40412247047318	46.2197520307824	60	693	single-organism transport	3	black
GO:0007269	0.0172810925561488	2.92420443587271	2.7345019238991	7	41	neurotransmitter secretion	3	black
GO:0044706	0.0173645626082311	3.27300150829563	2.13424540401881	6	32	multi-multicellular organism process	3	black
GO:0051649	0.0174738053602826	1.6051573921722	19.4082941427961	29	291	establishment of localization in cell	3	black
GO:0030534	0.0183586714019281	2.64565483476132	3.40145361265498	8	51	adult behavior	3	black
GO:0042051	0.0189717226177574	3.72621292645294	1.60068405301411	5	24	compound eye photoreceptor development	3	black
GO:0016310	0.0194364851399299	1.57647240209682	20.4087216759299	30	306	phosphorylation	3	black
GO:0036211	0.0200233705997305	1.4438183252564	34.2146216331766	46	513	protein modification process	3	black
GO:0006464	0.0200233705997305	1.4438183252564	34.2146216331766	46	513	cellular protein modification process	3	black
GO:0007617	0.0200707147578343	3.15105301379811	2.2009405728944	6	33	mating behavior	3	black
GO:0007618	0.0230499997635643	3.03781512605042	2.26763574176999	6	34	mating	3	black
GO:0003015	0.0230997322963934	4.34865134865135	1.13381787088499	4	17	heart process	3	black
GO:0008586	0.0230997322963934	4.34865134865135	1.13381787088499	4	17	imaginal disc-derived wing vein morphogenesis	3	black
GO:0060047	0.0230997322963934	4.34865134865135	1.13381787088499	4	17	heart contraction	3	black
GO:0030710	0.0243157713107685	14.0774193548387	0.266780675502351	2	4	regulation of border follicle cell delamination	3	black
GO:0046683	0.0243157713107685	14.0774193548387	0.266780675502351	2	4	response to organophosphorus	3	black
GO:0000018	0.0243157713107685	14.0774193548387	0.266780675502351	2	4	regulation of DNA recombination	3	black
GO:0051220	0.0243157713107685	14.0774193548387	0.266780675502351	2	4	cytoplasmic sequestering of protein	3	black
GO:0007188	0.0243157713107685	14.0774193548387	0.266780675502351	2	4	adenylate cyclase-modulating G-protein coupled receptor signaling pathway	3	black
GO:0007212	0.0243157713107685	14.0774193548387	0.266780675502351	2	4	dopamine receptor signaling pathway	3	black
GO:0016080	0.0243157713107685	14.0774193548387	0.266780675502351	2	4	synaptic vesicle targeting	3	black
GO:0042990	0.0248082741860062	6.04576976421637	0.666951688755879	3	10	regulation of transcription factor import into nucleus	3	black
GO:0042991	0.0248082741860062	6.04576976421637	0.666951688755879	3	10	transcription factor import into nucleus	3	black
GO:0051293	0.0248082741860062	6.04576976421637	0.666951688755879	3	10	establishment of spindle localization	3	black
GO:0051653	0.0248082741860062	6.04576976421637	0.666951688755879	3	10	spindle localization	3	black
GO:0051049	0.0252457851883053	2.47139588100687	3.60153911928174	8	54	regulation of transport	3	black
GO:0031327	0.0282198446942004	2.15733493879189	5.06883283454468	10	76	negative regulation of cellular biosynthetic process	3	black
GO:0016192	0.0337625809272964	1.621771422237	13.8058999572467	21	207	vesicle-mediated transport	3	black
GO:0010970	0.0338760284768065	3.76709956709957	1.26720820863617	4	19	microtubule-based transport	3	black
GO:0051223	0.0338760284768065	3.76709956709957	1.26720820863617	4	19	regulation of protein transport	3	black
GO:0009628	0.0342767022187774	1.87395696091348	7.46985891406584	13	112	response to abiotic stimulus	3	black
GO:0007619	0.0353026173588929	3.07534343577397	1.86746472851646	5	28	courtship behavior	3	black
GO:0006836	0.0369879406582988	2.27157894736842	3.8683197947841	8	58	neurotransmitter transport	3	black
GO:0051641	0.0373896864617721	1.47883232880691	21.5425395468149	30	323	cellular localization	3	black
GO:0044728	0.0387553752945645	9.38279569892473	0.333475844377939	2	5	DNA methylation or demethylation	3	black
GO:0006903	0.0387553752945645	9.38279569892473	0.333475844377939	2	5	vesicle targeting	3	black
GO:0008291	0.0387553752945645	9.38279569892473	0.333475844377939	2	5	acetylcholine metabolic process	3	black
GO:0000086	0.0387553752945645	9.38279569892473	0.333475844377939	2	5	G2/M transition of mitotic cell cycle	3	black
GO:1900619	0.0387553752945645	9.38279569892473	0.333475844377939	2	5	acetate ester metabolic process	3	black
GO:0051224	0.0387553752945645	9.38279569892473	0.333475844377939	2	5	negative regulation of protein transport	3	black
GO:0007187	0.0387553752945645	9.38279569892473	0.333475844377939	2	5	G-protein coupled receptor signaling pathway, coupled to cyclic nucleotide second messenger	3	black
GO:0042045	0.0387553752945645	9.38279569892473	0.333475844377939	2	5	epithelial fluid transport	3	black
GO:0006312	0.0387553752945645	9.38279569892473	0.333475844377939	2	5	mitotic recombination	3	black
GO:0006305	0.0387553752945645	9.38279569892473	0.333475844377939	2	5	DNA alkylation	3	black
GO:0006306	0.0387553752945645	9.38279569892473	0.333475844377939	2	5	DNA methylation	3	black
GO:0008049	0.0401915208453292	3.53084415584416	1.33390337751176	4	20	male courtship behavior	3	black
GO:0060179	0.0401915208453292	3.53084415584416	1.33390337751176	4	20	male mating behavior	3	black
GO:0046039	0.0404139982435326	2.94652551574376	1.93415989739205	5	29	GTP metabolic process	3	black
GO:0045814	0.0411951867086332	4.70010787486516	0.800342026507054	3	12	negative regulation of gene expression, epigenetic	3	black
GO:0006342	0.0411951867086332	4.70010787486516	0.800342026507054	3	12	chromatin silencing	3	black
GO:0016043	0.0413171792624544	1.29733560090703	56.8909790508764	69	853	cellular component organization	3	black
GO:0051650	0.0419971593977175	2.36284153005464	3.26806327490381	7	49	establishment of vesicle localization	3	black
GO:0051648	0.0419971593977175	2.36284153005464	3.26806327490381	7	49	vesicle localization	3	black
GO:0023061	0.0419971593977175	2.36284153005464	3.26806327490381	7	49	signal release	3	black
GO:0008038	0.0423716523242034	2.57456922162805	2.60111158614793	6	39	neuron recognition	3	black
GO:0010558	0.0447568637726495	2.06196103481316	4.73535699016674	9	71	negative regulation of macromolecule biosynthetic process	3	black
GO:0000226	0.0454041783969666	1.83784946236559	7.00299273193673	12	105	microtubule cytoskeleton organization	3	black
GO:0045664	0.0461646466747922	2.30735798703774	3.33475844377939	7	50	regulation of neuron differentiation	3	black
GO:0070201	0.0471302200606132	3.32238349885409	1.40059854638734	4	21	regulation of establishment of protein localization	3	black
GO:0008037	0.0471719994987038	2.49826989619377	2.66780675502351	6	40	cell recognition	3	black
GO:0006909	0.0478897745383587	2.14150943396226	4.06840530141086	8	61	phagocytosis	3	black
GO:1902589	0.0491976735521233	1.42852432549202	22.9431380932022	31	344	single-organism organelle organization	3	black
GOBPID	Pvalue	OddsRatio	ExpCount	Count	Size	GOTerm	ModuleNumber	ModuleColor
GO:0048731	0.00018424457508776	4.37164229853791	4.52116289012398	13	705	system development	4	paleturquoise
GO:0048707	0.000220221283591921	8.35740740740741	0.904232578024797	6	141	instar larval or pupal morphogenesis	4	paleturquoise
GO:0009886	0.000228912484531193	8.29411764705882	0.910645575032065	6	142	post-embryonic morphogenesis	4	paleturquoise
GO:0007552	0.000237873219103272	8.23175182481752	0.917058572039333	6	143	metamorphosis	4	paleturquoise
GO:0008587	0.00038666283877552	25.7111111111111	0.147498931167165	3	23	imaginal disc-derived wing margin morphogenesis	4	paleturquoise
GO:0002165	0.000423019158117074	7.34477124183007	1.01966652415562	6	159	instar larval or pupal development	4	paleturquoise
GO:0007476	0.000431742909260369	9.28571428571429	0.66053869174861	5	103	imaginal disc-derived wing morphogenesis	4	paleturquoise
GO:0007472	0.000451516857436255	9.18989898989899	0.666951688755879	5	104	wing disc morphogenesis	4	paleturquoise
GO:0032502	0.000463586380485625	3.72838250254323	6.40017101325353	15	998	developmental process	4	paleturquoise
GO:0035120	0.000537550940581277	8.8252427184466	0.692603676784951	5	108	post-embryonic appendage morphogenesis	4	paleturquoise
GO:0048513	0.000626742673999924	4.34166666666667	3.14236853356135	10	490	organ development	4	paleturquoise
GO:0035114	0.000689129855449182	8.32844036697248	0.731081658828559	5	114	imaginal disc-derived appendage morphogenesis	4	paleturquoise
GO:0048737	0.000746175266139654	8.17477477477478	0.743907652843095	5	116	imaginal disc-derived appendage development	4	paleturquoise
GO:0032501	0.000964222635510423	3.42666666666667	6.82984181274049	15	1065	multicellular organismal process	4	paleturquoise
GO:0035107	0.00101049174929941	7.61176470588235	0.79521162890124	5	124	appendage morphogenesis	4	paleturquoise
GO:0009791	0.00103040083553146	6.13461538461539	1.2056434373664	6	188	post-embryonic development	4	paleturquoise
GO:0048736	0.001207838298067	7.29677419354839	0.82727661393758	5	129	appendage development	4	paleturquoise
GO:0048563	0.00125052106205258	7.2368	0.833689610944848	5	130	post-embryonic organ morphogenesis	4	paleturquoise
GO:0007560	0.00125052106205258	7.2368	0.833689610944848	5	130	imaginal disc morphogenesis	4	paleturquoise
GO:0048856	0.00129610377974152	3.45160840136766	5.48952543822146	13	856	anatomical structure development	4	paleturquoise
GO:0035220	0.00133924347598216	7.11968503937008	0.846515604959384	5	132	wing disc development	4	paleturquoise
GO:0044767	0.00134478164692819	3.35265072765073	6.25908507909363	14	976	single-organism developmental process	4	paleturquoise
GO:0009887	0.00135902120509691	5.0137299771167	1.75074818298418	7	273	organ morphogenesis	4	paleturquoise
GO:0048569	0.00148099166964157	6.95076923076923	0.865754595981189	5	135	post-embryonic organ development	4	paleturquoise
GO:0048869	0.00149404808671883	3.82774674115456	3.50790936297563	10	547	cellular developmental process	4	paleturquoise
GO:0009653	0.00162571600191666	3.77992633517495	3.54638734501924	10	553	anatomical structure morphogenesis	4	paleturquoise
GO:0044707	0.001815003865333	3.22893541876892	6.4450619923044	14	1005	single-multicellular organism process	4	paleturquoise
GO:0007292	0.0020345751476614	6.44	0.929884566053869	5	145	female gamete generation	4	paleturquoise
GO:0007275	0.0021625209125062	3.22894910773298	5.79093629756306	13	903	multicellular organismal development	4	paleturquoise
GO:0007475	0.00296831598767374	30.1103896103896	0.0833689610944848	2	13	apposition of dorsal and ventral imaginal disc-derived wing surfaces	4	paleturquoise
GO:0030154	0.00340178871647173	3.57142857142857	3.25138948268491	9	507	cell differentiation	4	paleturquoise
GO:0007173	0.00344926322265972	27.5952380952381	0.0897819581017529	2	14	epidermal growth factor receptor signaling pathway	4	paleturquoise
GO:0038127	0.00344926322265972	27.5952380952381	0.0897819581017529	2	14	ERBB signaling pathway	4	paleturquoise
GO:0007444	0.00472103730475932	5.23625730994152	1.12868747327918	5	176	imaginal disc development	4	paleturquoise
GO:0016188	0.00641299700726816	Inf	0.00641299700726806	1	1	synaptic vesicle maturation	4	paleturquoise
GO:0040005	0.00641299700726816	Inf	0.00641299700726806	1	1	chitin-based cuticle attachment to epithelium	4	paleturquoise
GO:0043970	0.00641299700726816	Inf	0.00641299700726806	1	1	histone H3-K9 acetylation	4	paleturquoise
GO:0007276	0.00825513716592036	4.54285714285714	1.28901239846088	5	201	gamete generation	4	paleturquoise
GO:0051704	0.00902936472751531	3.84154929577465	1.85976913210774	6	290	multi-organism process	4	paleturquoise
GO:0048477	0.0117872302290739	5.06569343065693	0.904232578024797	4	141	oogenesis	4	paleturquoise
GO:0044702	0.0124032274841057	4.08387096774194	1.42368533561351	5	222	single organism reproductive process	4	paleturquoise
GO:0010976	0.0127862298680299	160.241379310345	0.0128259940145361	1	2	positive regulation of neuron projection development	4	paleturquoise
GO:0022404	0.0127862298680299	160.241379310345	0.0128259940145361	1	2	molting cycle process	4	paleturquoise
GO:0048490	0.0127862298680299	160.241379310345	0.0128259940145361	1	2	anterograde synaptic vesicle transport	4	paleturquoise
GO:0007319	0.0127862298680299	160.241379310345	0.0128259940145361	1	2	negative regulation of oskar mRNA translation	4	paleturquoise
GO:0007175	0.0127862298680299	160.241379310345	0.0128259940145361	1	2	negative regulation of epidermal growth factor-activated receptor activity	4	paleturquoise
GO:0047496	0.0127862298680299	160.241379310345	0.0128259940145361	1	2	vesicle transport along microtubule	4	paleturquoise
GO:2000272	0.0127862298680299	160.241379310345	0.0128259940145361	1	2	negative regulation of receptor activity	4	paleturquoise
GO:0061099	0.0127862298680299	160.241379310345	0.0128259940145361	1	2	negative regulation of protein tyrosine kinase activity	4	paleturquoise
GO:0019953	0.015065401205729	3.87719298245614	1.49422830269346	5	233	sexual reproduction	4	paleturquoise
GO:0032504	0.0153251953185257	3.85938864628821	1.50064129970073	5	234	multicellular organism reproduction	4	paleturquoise
GO:0010975	0.0154727797331581	11.7857142857143	0.192389910218042	2	30	regulation of neuron projection development	4	paleturquoise
GO:0048609	0.0155880206845894	3.84173913043478	1.50705429670799	5	235	multicellular organismal reproductive process	4	paleturquoise
GO:0071840	0.0157793840389594	2.53197444478248	5.61778537836682	11	876	cellular component organization or biogenesis	4	paleturquoise
GO:0044703	0.0161228264783756	3.80689655172414	1.51988029072253	5	237	multi-organism reproductive process	4	paleturquoise
GO:0007176	0.0191199366909469	80.1034482758621	0.0192389910218042	1	3	regulation of epidermal growth factor-activated receptor activity	4	paleturquoise
GO:0007296	0.0191199366909469	80.1034482758621	0.0192389910218042	1	3	vitellogenesis	4	paleturquoise
GO:0010469	0.0191199366909469	80.1034482758621	0.0192389910218042	1	3	regulation of receptor activity	4	paleturquoise
GO:0007569	0.0191199366909469	80.1034482758621	0.0192389910218042	1	3	cell aging	4	paleturquoise
GO:0021522	0.0191199366909469	80.1034482758621	0.0192389910218042	1	3	spinal cord motor neuron differentiation	4	paleturquoise
GO:0021517	0.0191199366909469	80.1034482758621	0.0192389910218042	1	3	ventral spinal cord development	4	paleturquoise
GO:0046011	0.0191199366909469	80.1034482758621	0.0192389910218042	1	3	regulation of oskar mRNA translation	4	paleturquoise
GO:0061097	0.0191199366909469	80.1034482758621	0.0192389910218042	1	3	regulation of protein tyrosine kinase activity	4	paleturquoise
GO:1902589	0.0198730486009489	3.18786982248521	2.20607097050021	6	344	single-organism organelle organization	4	paleturquoise
GO:0007431	0.0218830871221354	9.69327731092437	0.23086789226165	2	36	salivary gland development	4	paleturquoise
GO:0032269	0.0230423080203872	9.41428571428571	0.237280889268918	2	37	negative regulation of cellular protein metabolic process	4	paleturquoise
GO:0031344	0.0230423080203872	9.41428571428571	0.237280889268918	2	37	regulation of cell projection organization	4	paleturquoise
GO:0022414	0.0235333244096184	3.43125	1.67379221889696	5	261	reproductive process	4	paleturquoise
GO:0035272	0.0242265414359257	9.15079365079365	0.243693886276186	2	38	exocrine system development	4	paleturquoise
GO:0030182	0.0249541827093018	3.37538461538462	1.69944420692604	5	265	neuron differentiation	4	paleturquoise
GO:0050794	0.0252864344535443	2.21542553191489	8.52928601966652	14	1330	regulation of cellular process	4	paleturquoise
GO:0008069	0.0254143542095074	53.3908045977011	0.0256519880290723	1	4	dorsal/ventral axis specification, ovarian follicular epithelium	4	paleturquoise
GO:0008345	0.0254143542095074	53.3908045977011	0.0256519880290723	1	4	larval locomotory behavior	4	paleturquoise
GO:0050732	0.0254143542095074	53.3908045977011	0.0256519880290723	1	4	negative regulation of peptidyl-tyrosine phosphorylation	4	paleturquoise
GO:0072384	0.0254143542095074	53.3908045977011	0.0256519880290723	1	4	organelle transport along microtubule	4	paleturquoise
GO:0048146	0.0254143542095074	53.3908045977011	0.0256519880290723	1	4	positive regulation of fibroblast proliferation	4	paleturquoise
GO:0010092	0.0254143542095074	53.3908045977011	0.0256519880290723	1	4	specification of organ identity	4	paleturquoise
GO:0007383	0.0254143542095074	53.3908045977011	0.0256519880290723	1	4	specification of segmental identity, antennal segment	4	paleturquoise
GO:1901185	0.0254143542095074	53.3908045977011	0.0256519880290723	1	4	negative regulation of ERBB signaling pathway	4	paleturquoise
GO:0007481	0.0254143542095074	53.3908045977011	0.0256519880290723	1	4	haltere disc morphogenesis	4	paleturquoise
GO:0048735	0.0254143542095074	53.3908045977011	0.0256519880290723	1	4	haltere morphogenesis	4	paleturquoise
GO:0042059	0.0254143542095074	53.3908045977011	0.0256519880290723	1	4	negative regulation of epidermal growth factor receptor signaling pathway	4	paleturquoise
GO:0048844	0.0254143542095074	53.3908045977011	0.0256519880290723	1	4	artery morphogenesis	4	paleturquoise
GO:0021515	0.0254143542095074	53.3908045977011	0.0256519880290723	1	4	cell differentiation in spinal cord	4	paleturquoise
GO:0060840	0.0254143542095074	53.3908045977011	0.0256519880290723	1	4	artery development	4	paleturquoise
GO:0051248	0.0266686666175349	8.66541353383459	0.256519880290723	2	40	negative regulation of protein metabolic process	4	paleturquoise
GO:0044699	0.0267668304118171	2.48935427574171	18.5271483539974	24	2889	single-organism process	4	paleturquoise
GO:0051128	0.0285318858710359	3.81880341880342	1.17999144933732	4	184	regulation of cellular component organization	4	paleturquoise
GO:0051056	0.0292067355634836	8.22857142857143	0.269345874305259	2	42	regulation of small GTPase mediated signal transduction	4	paleturquoise
GO:0000003	0.0295507681803051	3.21764705882353	1.77640017101325	5	277	reproduction	4	paleturquoise
GO:0006897	0.031655501103732	4.76100628930818	0.699016673792219	3	109	endocytosis	4	paleturquoise
GO:0097065	0.0316697177896776	40.0344827586207	0.0320649850363403	1	5	anterior head development	4	paleturquoise
GO:1902100	0.0316697177896776	40.0344827586207	0.0320649850363403	1	5	negative regulation of metaphase/anaphase transition of cell cycle	4	paleturquoise
GO:0007094	0.0316697177896776	40.0344827586207	0.0320649850363403	1	5	mitotic spindle assembly checkpoint	4	paleturquoise
GO:0048144	0.0316697177896776	40.0344827586207	0.0320649850363403	1	5	fibroblast proliferation	4	paleturquoise
GO:0048145	0.0316697177896776	40.0344827586207	0.0320649850363403	1	5	regulation of fibroblast proliferation	4	paleturquoise
GO:0007380	0.0316697177896776	40.0344827586207	0.0320649850363403	1	5	specification of segmental identity, head	4	paleturquoise
GO:0034720	0.0316697177896776	40.0344827586207	0.0320649850363403	1	5	histone H3-K4 demethylation	4	paleturquoise
GO:0051784	0.0316697177896776	40.0344827586207	0.0320649850363403	1	5	negative regulation of nuclear division	4	paleturquoise
GO:1901184	0.0316697177896776	40.0344827586207	0.0320649850363403	1	5	regulation of ERBB signaling pathway	4	paleturquoise
GO:0007482	0.0316697177896776	40.0344827586207	0.0320649850363403	1	5	haltere development	4	paleturquoise
GO:0042058	0.0316697177896776	40.0344827586207	0.0320649850363403	1	5	regulation of epidermal growth factor receptor signaling pathway	4	paleturquoise
GO:0045841	0.0316697177896776	40.0344827586207	0.0320649850363403	1	5	negative regulation of mitotic metaphase/anaphase transition	4	paleturquoise
GO:0045839	0.0316697177896776	40.0344827586207	0.0320649850363403	1	5	negative regulation of mitosis	4	paleturquoise
GO:0031577	0.0316697177896776	40.0344827586207	0.0320649850363403	1	5	spindle checkpoint	4	paleturquoise
GO:0040034	0.0316697177896776	40.0344827586207	0.0320649850363403	1	5	regulation of development, heterochronic	4	paleturquoise
GO:0035160	0.0316697177896776	40.0344827586207	0.0320649850363403	1	5	maintenance of epithelial integrity, open tracheal system	4	paleturquoise
GO:0035288	0.0316697177896776	40.0344827586207	0.0320649850363403	1	5	anterior head segmentation	4	paleturquoise
GO:0035216	0.0316697177896776	40.0344827586207	0.0320649850363403	1	5	haltere disc development	4	paleturquoise
GO:0071173	0.0316697177896776	40.0344827586207	0.0320649850363403	1	5	spindle assembly checkpoint	4	paleturquoise
GO:0071174	0.0316697177896776	40.0344827586207	0.0320649850363403	1	5	mitotic spindle checkpoint	4	paleturquoise
GO:0044763	0.0318674039506156	2.1592841163311	14.4613082513895	20	2255	single-organism cellular process	4	paleturquoise
GO:0048699	0.0320411156920249	3.14388489208633	1.81487815305686	5	283	generation of neurons	4	paleturquoise
GO:0016043	0.0345587015099392	2.25682087781732	5.47028644719966	10	853	cellular component organization	4	paleturquoise
GO:2000112	0.0352048358563371	2.76036269430052	2.51389482684908	6	392	regulation of cellular macromolecule biosynthetic process	4	paleturquoise
GO:0006396	0.0360417296637704	3.53211736716891	1.26977340743908	4	198	RNA processing	4	paleturquoise
GO:0022008	0.0364832213554641	3.02777777777778	1.87900812312954	5	293	neurogenesis	4	paleturquoise
GO:0010556	0.0371535402320825	2.72186700767263	2.54595981188542	6	397	regulation of macromolecule biosynthetic process	4	paleturquoise
GO:0050808	0.0373700726158536	7.14596273291925	0.307823856348867	2	48	synapse organization	4	paleturquoise
GO:0001570	0.0378862614375078	32.0206896551724	0.0384779820436084	1	6	vasculogenesis	4	paleturquoise
GO:0001964	0.0378862614375078	32.0206896551724	0.0384779820436084	1	6	startle response	4	paleturquoise
GO:0048134	0.0378862614375078	32.0206896551724	0.0384779820436084	1	6	germ-line cyst formation	4	paleturquoise
GO:0000288	0.0378862614375078	32.0206896551724	0.0384779820436084	1	6	nuclear-transcribed mRNA catabolic process, deadenylation-dependent decay	4	paleturquoise
GO:0000289	0.0378862614375078	32.0206896551724	0.0384779820436084	1	6	nuclear-transcribed mRNA poly(A) tail shortening	4	paleturquoise
GO:0031987	0.0378862614375078	32.0206896551724	0.0384779820436084	1	6	locomotion involved in locomotory behavior	4	paleturquoise
GO:0035287	0.0378862614375078	32.0206896551724	0.0384779820436084	1	6	head segmentation	4	paleturquoise
GO:0043966	0.0378862614375078	32.0206896551724	0.0384779820436084	1	6	histone H3 acetylation	4	paleturquoise
GO:0010669	0.0378862614375078	32.0206896551724	0.0384779820436084	1	6	epithelial structure maintenance	4	paleturquoise
GO:0045664	0.0402656252366117	6.84523809523809	0.320649850363403	2	50	regulation of neuron differentiation	4	paleturquoise
GO:0007417	0.0404039991719645	4.30294396961064	0.769559640872168	3	120	central nervous system development	4	paleturquoise
GO:0050793	0.0414294025436811	3.36870026525199	1.32749038050449	4	207	regulation of developmental process	4	paleturquoise
GO:0018193	0.0417446938578263	6.70408163265306	0.327062847370671	2	51	peptidyl-amino acid modification	4	paleturquoise
GO:0031326	0.0429844662812473	2.61913580246914	2.63574176998717	6	411	regulation of cellular biosynthetic process	4	paleturquoise
GO:0009889	0.0438631837265218	2.60503685503686	2.64856776400171	6	413	regulation of biosynthetic process	4	paleturquoise
GO:0016577	0.0440642178067014	26.6781609195402	0.0448909790508764	1	7	histone demethylation	4	paleturquoise
GO:0008214	0.0440642178067014	26.6781609195402	0.0448909790508764	1	7	protein dealkylation	4	paleturquoise
GO:0070076	0.0440642178067014	26.6781609195402	0.0448909790508764	1	7	histone lysine demethylation	4	paleturquoise
GO:0031346	0.0440642178067014	26.6781609195402	0.0448909790508764	1	7	positive regulation of cell projection organization	4	paleturquoise
GO:0070988	0.0440642178067014	26.6781609195402	0.0448909790508764	1	7	demethylation	4	paleturquoise
GO:0006482	0.0440642178067014	26.6781609195402	0.0448909790508764	1	7	protein demethylation	4	paleturquoise
GO:0021510	0.0440642178067014	26.6781609195402	0.0448909790508764	1	7	spinal cord development	4	paleturquoise
GO:0006911	0.0447638830255667	6.43837535014006	0.339888841385207	2	53	phagocytosis, engulfment	4	paleturquoise
GO:0010324	0.0447638830255667	6.43837535014006	0.339888841385207	2	53	membrane invagination	4	paleturquoise
GO:0050789	0.0497201461361301	1.96905594405594	9.26036767849508	14	1444	regulation of biological process	4	paleturquoise
GOBPID	Pvalue	OddsRatio	ExpCount	Count	Size	GOTerm	ModuleNumber	ModuleColor
GO:0006182	0.000333048210318793	17.5321637426901	0.374091492090637	4	10	cGMP biosynthetic process	5	royalblue
GO:0009190	0.000678791012128203	8.8	0.748182984181274	5	20	cyclic nucleotide biosynthetic process	5	royalblue
GO:0052652	0.0010379966660208	11.6803118908382	0.486318939717828	4	13	cyclic purine nucleotide metabolic process	5	royalblue
GO:0046068	0.00141109006233401	10.5099415204678	0.523728088926892	4	14	cGMP metabolic process	5	royalblue
GO:0006278	0.00141109006233401	10.5099415204678	0.523728088926892	4	14	RNA-dependent DNA replication	5	royalblue
GO:0000075	0.00164787998159764	6.94117647058824	0.897819581017529	5	24	cell cycle checkpoint	5	royalblue
GO:0009187	0.00337555218181143	5.72890025575448	1.04745617785378	5	28	cyclic nucleotide metabolic process	5	royalblue
GO:0031572	0.00407225338698774	52.0462427745665	0.112227447627191	2	3	G2 DNA damage checkpoint	5	royalblue
GO:0060041	0.00508509044943004	11.202657807309	0.374091492090637	3	10	retina development in camera-type eye	5	royalblue
GO:0006259	0.00747950388977598	2.07483749572357	8.94078666096622	17	239	DNA metabolic process	5	royalblue
GO:0006974	0.00918024049051588	2.58899676375405	4.2272338606242	10	113	cellular response to DNA damage stimulus	5	royalblue
GO:0044283	0.0109836668604475	2.86713060365755	3.06755023514322	8	82	small molecule biosynthetic process	5	royalblue
GO:0000077	0.0168016997699717	6.52761627906977	0.561137238135956	3	15	DNA damage checkpoint	5	royalblue
GO:0031570	0.0168016997699717	6.52761627906977	0.561137238135956	3	15	DNA integrity checkpoint	5	royalblue
GO:1901360	0.0240899090140315	1.41964594028408	42.309747755451	54	1131	organic cyclic compound metabolic process	5	royalblue
GO:0046483	0.0243461012475059	1.42157121970946	41.4119281744335	53	1107	heterocycle metabolic process	5	royalblue
GO:0046545	0.0258154585728427	10.4	0.261864044463446	2	7	development of primary female sexual characteristics	5	royalblue
GO:0046660	0.0258154585728427	10.4	0.261864044463446	2	7	female sex differentiation	5	royalblue
GO:0008585	0.0258154585728427	10.4	0.261864044463446	2	7	female gonad development	5	royalblue
GO:0043010	0.0277614149818616	5.21860465116279	0.673364685763147	3	18	camera-type eye development	5	royalblue
GO:0044711	0.0333477561138721	1.72070695008359	10.549380076956	17	282	single-organism biosynthetic process	5	royalblue
GO:0051052	0.0367321777908969	4.60259917920657	0.748182984181274	3	20	regulation of DNA metabolic process	5	royalblue
GO:0006780	0.0374091492090637	Inf	0.0374091492090637	1	1	uroporphyrinogen III biosynthetic process	5	royalblue
GO:0006781	0.0374091492090637	Inf	0.0374091492090637	1	1	succinyl-CoA pathway	5	royalblue
GO:0016576	0.0374091492090637	Inf	0.0374091492090637	1	1	histone dephosphorylation	5	royalblue
GO:0031061	0.0374091492090637	Inf	0.0374091492090637	1	1	negative regulation of histone methylation	5	royalblue
GO:0031057	0.0374091492090637	Inf	0.0374091492090637	1	1	negative regulation of histone modification	5	royalblue
GO:0051095	0.0374091492090637	Inf	0.0374091492090637	1	1	regulation of helicase activity	5	royalblue
GO:0051096	0.0374091492090637	Inf	0.0374091492090637	1	1	positive regulation of helicase activity	5	royalblue
GO:0018377	0.0374091492090637	Inf	0.0374091492090637	1	1	protein myristoylation	5	royalblue
GO:0046502	0.0374091492090637	Inf	0.0374091492090637	1	1	uroporphyrinogen III metabolic process	5	royalblue
GO:0048132	0.0374091492090637	Inf	0.0374091492090637	1	1	female germ-line stem cell division	5	royalblue
GO:0048133	0.0374091492090637	Inf	0.0374091492090637	1	1	male germ-line stem cell division	5	royalblue
GO:0007382	0.0374091492090637	Inf	0.0374091492090637	1	1	specification of segmental identity, maxillary segment	5	royalblue
GO:0007468	0.0374091492090637	Inf	0.0374091492090637	1	1	regulation of rhodopsin gene expression	5	royalblue
GO:0045872	0.0374091492090637	Inf	0.0374091492090637	1	1	positive regulation of rhodopsin gene expression	5	royalblue
GO:0031573	0.0374091492090637	Inf	0.0374091492090637	1	1	intra-S DNA damage checkpoint	5	royalblue
GO:0051570	0.0374091492090637	Inf	0.0374091492090637	1	1	regulation of histone H3-K9 methylation	5	royalblue
GO:0051573	0.0374091492090637	Inf	0.0374091492090637	1	1	negative regulation of histone H3-K9 methylation	5	royalblue
GO:0060042	0.0374091492090637	Inf	0.0374091492090637	1	1	retina morphogenesis in camera-type eye	5	royalblue
GO:0007285	0.0374091492090637	Inf	0.0374091492090637	1	1	primary spermatocyte growth	5	royalblue
GO:0010216	0.0374091492090637	Inf	0.0374091492090637	1	1	maintenance of DNA methylation	5	royalblue
GO:0045938	0.0374091492090637	Inf	0.0374091492090637	1	1	positive regulation of circadian sleep/wake cycle, sleep	5	royalblue
GO:0060250	0.0374091492090637	Inf	0.0374091492090637	1	1	germ-line stem-cell niche homeostasis	5	royalblue
GO:0006498	0.0374091492090637	Inf	0.0374091492090637	1	1	N-terminal protein lipidation	5	royalblue
GO:0006499	0.0374091492090637	Inf	0.0374091492090637	1	1	N-terminal protein myristoylation	5	royalblue
GO:0044030	0.0374091492090637	Inf	0.0374091492090637	1	1	regulation of DNA methylation	5	royalblue
GO:0006104	0.0374091492090637	Inf	0.0374091492090637	1	1	succinyl-CoA metabolic process	5	royalblue
GO:0006139	0.0374344729232849	1.38336633663366	39.6536981616075	50	1060	nucleobase-containing compound metabolic process	5	royalblue
GO:0051240	0.0417084782820739	4.34593023255814	0.785592133390338	3	21	positive regulation of multicellular organismal process	5	royalblue
GO:0009165	0.0454243558589962	2.27469135802469	3.29200513039761	7	88	nucleotide biosynthetic process	5	royalblue
GO:0046390	0.0457301688024521	2.46246301775148	2.61864044463446	6	70	ribose phosphate biosynthetic process	5	royalblue
GO:0009260	0.0457301688024521	2.46246301775148	2.61864044463446	6	70	ribonucleotide biosynthetic process	5	royalblue
GO:0006725	0.0463702655233006	1.35592372568333	41.112654980761	51	1099	cellular aromatic compound metabolic process	5	royalblue
GOBPID	Pvalue	OddsRatio	ExpCount	Count	Size	GOTerm	ModuleNumber	ModuleColor
GO:0046365	9.54927281878793e-05	44.8451612903226	0.0944848225737495	3	34	monosaccharide catabolic process	6	violet
GO:0019320	9.54927281878793e-05	44.8451612903226	0.0944848225737495	3	34	hexose catabolic process	6	violet
GO:0006007	9.54927281878793e-05	44.8451612903226	0.0944848225737495	3	34	glucose catabolic process	6	violet
GO:0044724	0.000133758205047864	39.6857142857143	0.105600684053014	3	38	single-organism carbohydrate catabolic process	6	violet
GO:0016052	0.000133758205047864	39.6857142857143	0.105600684053014	3	38	carbohydrate catabolic process	6	violet
GO:0006006	0.000194106321132977	34.6875	0.119495510902095	3	43	glucose metabolic process	6	violet
GO:0044710	0.000198149224853142	8.79868421052632	2.6650277896537	9	959	single-organism metabolic process	6	violet
GO:0019318	0.000362572782882881	27.69	0.147285164600257	3	53	hexose metabolic process	6	violet
GO:0005996	0.000383282794536616	27.1411764705882	0.150064129970073	3	54	monosaccharide metabolic process	6	violet
GO:0044712	0.000409834310543555	15.1445279866332	0.380718255664814	4	137	single-organism catabolic process	6	violet
GO:0006633	0.00106386198281191	52.8295454545455	0.0500213766566909	2	18	fatty acid biosynthetic process	6	violet
GO:0072330	0.00159617712205725	42.2272727272727	0.0611372381359555	2	22	monocarboxylic acid biosynthetic process	6	violet
GO:0006091	0.00160524152667603	16.1647058823529	0.244548952543822	3	88	generation of precursor metabolites and energy	6	violet
GO:0006096	0.00240641692078671	33.7454545454545	0.0750320649850363	2	27	glycolysis	6	violet
GO:0044255	0.00252511428661631	13.695	0.286233433091065	3	103	cellular lipid metabolic process	6	violet
GO:0015757	0.00277896536981614	Inf	0.00277896536981616	1	1	galactose transport	6	violet
GO:0015780	0.00277896536981614	Inf	0.00277896536981616	1	1	nucleotide-sugar transport	6	violet
GO:0015781	0.00277896536981614	Inf	0.00277896536981616	1	1	pyrimidine nucleotide-sugar transport	6	violet
GO:0015782	0.00277896536981614	Inf	0.00277896536981616	1	1	CMP-N-acetylneuraminate transport	6	violet
GO:0015785	0.00277896536981614	Inf	0.00277896536981616	1	1	UDP-galactose transport	6	violet
GO:0015789	0.00277896536981614	Inf	0.00277896536981616	1	1	UDP-N-acetylgalactosamine transport	6	violet
GO:0044723	0.00304686965239335	12.7794392523364	0.305686190679778	3	110	single-organism carbohydrate metabolic process	6	violet
GO:0006631	0.00402840928987686	25.5206611570248	0.0972637879435656	2	35	fatty acid metabolic process	6	violet
GO:0055114	0.0041696966823586	7.81584772023019	0.708636169303121	4	255	oxidation-reduction process	6	violet
GO:1901575	0.00453536386974475	7.62300043233895	0.725309961522018	4	261	organic substance catabolic process	6	violet
GO:0006862	0.00555080061681035	388.666666666667	0.00555793073963232	1	2	nucleotide transport	6	violet
GO:1901264	0.00555080061681035	388.666666666667	0.00555793073963232	1	2	carbohydrate derivative transport	6	violet
GO:0005975	0.00626282841211136	9.76834532374101	0.394613082513895	3	142	carbohydrate metabolic process	6	violet
GO:0032787	0.00631512404376378	20.012987012987	0.122274476271911	2	44	monocarboxylic acid metabolic process	6	violet
GO:0009056	0.00669834689737555	6.77971351142083	0.808678922616503	4	291	catabolic process	6	violet
GO:0006629	0.00743123822206518	9.15608108108108	0.41962377084224	3	151	lipid metabolic process	6	violet
GO:0015749	0.0110731477991421	129.5	0.0111158614792646	1	4	monosaccharide transport	6	violet
GO:0008645	0.0110731477991421	129.5	0.0111158614792646	1	4	hexose transport	6	violet
GO:0046394	0.0111567125136149	14.6985645933014	0.163958956819153	2	59	carboxylic acid biosynthetic process	6	violet
GO:0016053	0.0111567125136149	14.6985645933014	0.163958956819153	2	59	organic acid biosynthetic process	6	violet
GO:0015748	0.0165671753022416	77.6666666666667	0.016673792218897	1	6	organophosphate ester transport	6	violet
GO:0019637	0.017805779419156	6.52682926829268	0.578024796921761	3	208	organophosphate metabolic process	6	violet
GO:0008610	0.0185491623122725	11.1272727272727	0.213980333475844	2	77	lipid biosynthetic process	6	violet
GO:0006740	0.0193036108161697	64.7083333333333	0.0194527575887131	1	7	NADPH regeneration	6	violet
GO:0006739	0.0193036108161697	64.7083333333333	0.0194527575887131	1	7	NADP metabolic process	6	violet
GO:0006098	0.0193036108161697	64.7083333333333	0.0194527575887131	1	7	pentose-phosphate shunt	6	violet
GO:0044283	0.0208891973508421	10.4204545454545	0.227875160324925	2	82	small molecule biosynthetic process	6	violet
GO:0044281	0.0217710530040114	4.67489711934156	1.13659683625481	4	409	small molecule metabolic process	6	violet
GO:0006094	0.022033016309509	55.4523809523809	0.0222317229585293	1	8	gluconeogenesis	6	violet
GO:0046364	0.0247554083411959	48.5104166666667	0.0250106883283454	1	9	monosaccharide biosynthetic process	6	violet
GO:0046496	0.0247554083411959	48.5104166666667	0.0250106883283454	1	9	nicotinamide nucleotide metabolic process	6	violet
GO:0008643	0.0247554083411959	48.5104166666667	0.0250106883283454	1	9	carbohydrate transport	6	violet
GO:0019319	0.0247554083411959	48.5104166666667	0.0250106883283454	1	9	hexose biosynthetic process	6	violet
GO:0019362	0.0274708034346989	43.1111111111111	0.0277896536981616	1	10	pyridine nucleotide metabolic process	6	violet
GO:0072524	0.0328806687241114	35.2575757575758	0.0333475844377939	1	12	pyridine-containing compound metabolic process	6	violet
GO:0044711	0.0394906353212486	4.71612903225806	0.783668234288157	3	282	single-organism biosynthetic process	6	violet
GO:0006733	0.0409434006768882	27.6845238095238	0.0416844805472424	1	15	oxidoreduction coenzyme metabolic process	6	violet
GOBPID	Pvalue	OddsRatio	ExpCount	Count	Size	GOTerm	ModuleNumber	ModuleColor
GO:0006091	2.547637955683e-18	26.0561594202899	1.26036767849508	19	88	generation of precursor metabolites and energy	7	darkturquoise
GO:0045333	2.55248918174421e-14	41.7	0.515604959384352	12	36	cellular respiration	7	darkturquoise
GO:0015980	5.55899787187796e-14	30.5941358024691	0.701795639162035	13	49	energy derivation by oxidation of organic compounds	7	darkturquoise
GO:0006099	7.70011445328652e-11	56.7026194144838	0.272124839675075	8	19	tricarboxylic acid cycle	7	darkturquoise
GO:0009060	3.14915199675485e-10	44.5230024213075	0.315091919623771	8	22	aerobic respiration	7	darkturquoise
GO:0044710	1.18910573002535e-07	3.86243806377843	13.7351432235998	33	959	single-organism metabolic process	7	darkturquoise
GO:0055114	3.47791985685437e-07	5.73894495036508	3.65220179563916	16	255	oxidation-reduction process	7	darkturquoise
GO:0006119	6.10449390505089e-07	46.4012096774194	0.186190679777683	5	13	oxidative phosphorylation	7	darkturquoise
GO:0022900	7.5608172701259e-07	25.0983606557377	0.343736639589568	6	24	electron transport chain	7	darkturquoise
GO:0044763	2.61576524380743e-05	2.96778986602196	32.2969217614365	49	2255	single-organism cellular process	7	darkturquoise
GO:1902600	2.70097869186638e-05	17.6267281105991	0.372381359555366	5	26	hydrogen ion transmembrane transport	7	darkturquoise
GO:0015985	2.70097869186638e-05	17.6267281105991	0.372381359555366	5	26	energy coupled proton transport, down electrochemical gradient	7	darkturquoise
GO:0015986	2.70097869186638e-05	17.6267281105991	0.372381359555366	5	26	ATP synthesis coupled proton transport	7	darkturquoise
GO:0006106	2.75212478169066e-05	108.0234375	0.0716117999144934	3	5	fumarate metabolic process	7	darkturquoise
GO:0034220	4.7167266956712e-05	15.4133064516129	0.415348439504062	5	29	ion transmembrane transport	7	darkturquoise
GO:0015992	4.7167266956712e-05	15.4133064516129	0.415348439504062	5	29	proton transport	7	darkturquoise
GO:0006818	5.59771352981683e-05	14.7935483870968	0.42967079948696	5	30	hydrogen transport	7	darkturquoise
GO:0022904	6.14732446611712e-05	24.3333333333333	0.229157759726379	4	16	respiratory electron transport chain	7	darkturquoise
GO:0046129	7.46989678066362e-05	9.98032786885246	0.730440359127832	6	51	purine ribonucleoside biosynthetic process	7	darkturquoise
GO:0042451	7.46989678066362e-05	9.98032786885246	0.730440359127832	6	51	purine nucleoside biosynthetic process	7	darkturquoise
GO:0043648	7.95242158861832e-05	22.4566544566545	0.243480119709277	4	17	dicarboxylic acid metabolic process	7	darkturquoise
GO:0044699	8.06859100735937e-05	3.19507107788082	41.3772979905943	56	2889	single-organism process	7	darkturquoise
GO:0009163	0.000103578865049938	9.35040983606557	0.773407439076528	6	54	nucleoside biosynthetic process	7	darkturquoise
GO:1901659	0.000103578865049938	9.35040983606557	0.773407439076528	6	54	glycosyl compound biosynthetic process	7	darkturquoise
GO:0042455	0.000103578865049938	9.35040983606557	0.773407439076528	6	54	ribonucleoside biosynthetic process	7	darkturquoise
GO:0006754	0.00026062630422826	10.2486559139785	0.587216759298846	5	41	ATP biosynthetic process	7	darkturquoise
GO:0046034	0.00026062630422826	10.2486559139785	0.587216759298846	5	41	ATP metabolic process	7	darkturquoise
GO:0042773	0.00031367945172593	30.8303571428571	0.143223599828987	3	10	ATP synthesis coupled electron transport	7	darkturquoise
GO:0009152	0.000318508189837431	7.46065573770492	0.945275758871313	6	66	purine ribonucleotide biosynthetic process	7	darkturquoise
GO:0009145	0.000365372916819635	9.45409429280397	0.630183839247542	5	44	purine nucleoside triphosphate biosynthetic process	7	darkturquoise
GO:0009206	0.000365372916819635	9.45409429280397	0.630183839247542	5	44	purine ribonucleoside triphosphate biosynthetic process	7	darkturquoise
GO:0006164	0.00037518787698079	7.21681649920677	0.97392047883711	6	68	purine nucleotide biosynthetic process	7	darkturquoise
GO:0046390	0.000439484168203833	6.98821721311475	1.00256519880291	6	70	ribose phosphate biosynthetic process	7	darkturquoise
GO:0009260	0.000439484168203833	6.98821721311475	1.00256519880291	6	70	ribonucleotide biosynthetic process	7	darkturquoise
GO:0009142	0.000451092376218479	8.98898505114083	0.658828559213339	5	46	nucleoside triphosphate biosynthetic process	7	darkturquoise
GO:0009201	0.000451092376218479	8.98898505114083	0.658828559213339	5	46	ribonucleoside triphosphate biosynthetic process	7	darkturquoise
GO:0072522	0.000474703941242858	6.87919293820933	1.01688755878581	6	71	purine-containing compound biosynthetic process	7	darkturquoise
GO:0009168	0.000499248372742152	8.77304147465438	0.673150919196238	5	47	purine ribonucleoside monophosphate biosynthetic process	7	darkturquoise
GO:0009127	0.000499248372742152	8.77304147465438	0.673150919196238	5	47	purine nucleoside monophosphate biosynthetic process	7	darkturquoise
GO:0006096	0.000526446225207219	12.6652864044168	0.386703719538264	4	27	glycolysis	7	darkturquoise
GO:0009167	0.000551179309158935	8.56714178544636	0.687473279179136	5	48	purine ribonucleoside monophosphate metabolic process	7	darkturquoise
GO:0009126	0.000551179309158935	8.56714178544636	0.687473279179136	5	48	purine nucleoside monophosphate metabolic process	7	darkturquoise
GO:0046149	0.000600715662818664	141.846153846154	0.042967079948696	2	3	pigment catabolic process	7	darkturquoise
GO:0042167	0.000600715662818664	141.846153846154	0.042967079948696	2	3	heme catabolic process	7	darkturquoise
GO:0042777	0.000600715662818664	141.846153846154	0.042967079948696	2	3	plasma membrane ATP synthesis coupled proton transport	7	darkturquoise
GO:0009156	0.000800450041068043	7.83115991763898	0.744762719110731	5	52	ribonucleoside monophosphate biosynthetic process	7	darkturquoise
GO:0009161	0.000874131405523079	7.66633064516129	0.75908507909363	5	53	ribonucleoside monophosphate metabolic process	7	darkturquoise
GO:0009124	0.000874131405523079	7.66633064516129	0.75908507909363	5	53	nucleoside monophosphate biosynthetic process	7	darkturquoise
GO:0009123	0.00095275921577544	7.50822909809085	0.773407439076528	5	54	nucleoside monophosphate metabolic process	7	darkturquoise
GO:0046128	0.00102613266075405	5.86928386540121	1.17443351859769	6	82	purine ribonucleoside metabolic process	7	darkturquoise
GO:0042278	0.00102613266075405	5.86928386540121	1.17443351859769	6	82	purine nucleoside metabolic process	7	darkturquoise
GO:0006787	0.00119030868564397	70.9076923076923	0.0572894399315947	2	4	porphyrin-containing compound catabolic process	7	darkturquoise
GO:0033015	0.00119030868564397	70.9076923076923	0.0572894399315947	2	4	tetrapyrrole catabolic process	7	darkturquoise
GO:0009119	0.00123933993607734	5.64266445320606	1.21740059854639	6	85	ribonucleoside metabolic process	7	darkturquoise
GO:0046365	0.0012902227356303	9.69523809523809	0.486960239418555	4	34	monosaccharide catabolic process	7	darkturquoise
GO:0019320	0.0012902227356303	9.69523809523809	0.486960239418555	4	34	hexose catabolic process	7	darkturquoise
GO:0006007	0.0012902227356303	9.69523809523809	0.486960239418555	4	34	glucose catabolic process	7	darkturquoise
GO:0009165	0.00148501121997999	5.43262694922031	1.26036767849508	6	88	nucleotide biosynthetic process	7	darkturquoise
GO:0051187	0.00196550031086202	47.2615384615385	0.0716117999144934	2	5	cofactor catabolic process	7	darkturquoise
GO:0044724	0.00196725293833428	8.54715219421102	0.54424967935015	4	38	single-organism carbohydrate catabolic process	7	darkturquoise
GO:0016052	0.00196725293833428	8.54715219421102	0.54424967935015	4	38	carbohydrate catabolic process	7	darkturquoise
GO:1901293	0.00197516856781644	5.11475409836066	1.33197947840958	6	93	nucleoside phosphate biosynthetic process	7	darkturquoise
GO:0009116	0.00208639126319094	5.05551415797317	1.34630183839248	6	94	nucleoside metabolic process	7	darkturquoise
GO:1901657	0.00208639126319094	5.05551415797317	1.34630183839248	6	94	glycosyl compound metabolic process	7	darkturquoise
GO:0009150	0.00285654758662319	4.72654342518312	1.43223599828987	6	100	purine ribonucleotide metabolic process	7	darkturquoise
GO:0009144	0.00305710859020101	5.64019851116625	1.00256519880291	5	70	purine nucleoside triphosphate metabolic process	7	darkturquoise
GO:0009205	0.00305710859020101	5.64019851116625	1.00256519880291	5	70	purine ribonucleoside triphosphate metabolic process	7	darkturquoise
GO:0006006	0.00311731570279746	7.44322344322344	0.615861479264643	4	43	glucose metabolic process	7	darkturquoise
GO:0044712	0.00318143074265706	4.02141025641026	1.96216331765712	7	137	single-organism catabolic process	7	darkturquoise
GO:0009259	0.00331349818770108	4.57731958762887	1.47520307823856	6	103	ribonucleotide metabolic process	7	darkturquoise
GO:0019693	0.00331349818770108	4.57731958762887	1.47520307823856	6	103	ribose phosphate metabolic process	7	darkturquoise
GO:0009199	0.00345727180533889	5.4694270582571	1.0312099187687	5	72	ribonucleoside triphosphate metabolic process	7	darkturquoise
GO:0009141	0.00367091425931679	5.38780834914611	1.0455322787516	5	73	nucleoside triphosphate metabolic process	7	darkturquoise
GO:0006163	0.00382307177061314	4.43704918032787	1.51817015818726	6	106	purine nucleotide metabolic process	7	darkturquoise
GO:0055085	0.00400824100808303	3.20398251578436	3.17956391620351	9	222	transmembrane transport	7	darkturquoise
GO:0042168	0.00405167245937086	28.3446153846154	0.100256519880291	2	7	heme metabolic process	7	darkturquoise
GO:0072521	0.00523695715040894	4.14034012563199	1.61842667806755	6	113	purine-containing compound metabolic process	7	darkturquoise
GO:0015672	0.00594804306031938	4.024739195231	1.66139375801625	6	116	monovalent inorganic cation transport	7	darkturquoise
GO:0044711	0.00626463927254578	2.79863261093911	4.03890551517743	10	282	single-organism biosynthetic process	7	darkturquoise
GO:0019318	0.00664641112643056	5.91124068675089	0.75908507909363	4	53	hexose metabolic process	7	darkturquoise
GO:0042775	0.00681829915715399	20.2373626373626	0.128901239846088	2	9	mitochondrial ATP synthesis coupled electron transport	7	darkturquoise
GO:0016321	0.00681829915715399	20.2373626373626	0.128901239846088	2	9	female meiosis chromosome segregation	7	darkturquoise
GO:0005996	0.00710190327928296	5.79174603174603	0.773407439076528	4	54	monosaccharide metabolic process	7	darkturquoise
GO:0090407	0.00787937041821488	3.7780580075662	1.76165027789654	6	123	organophosphate biosynthetic process	7	darkturquoise
GO:1901137	0.00883244780179027	3.68114754098361	1.80461735784523	6	126	carbohydrate derivative biosynthetic process	7	darkturquoise
GO:1901135	0.0104198781332357	2.91426209177346	3.05066267635742	8	213	carbohydrate derivative metabolic process	7	darkturquoise
GO:1901575	0.0113224797758189	2.68411330049261	3.73813595553655	9	261	organic substance catabolic process	7	darkturquoise
GO:0006778	0.0121586847163255	14.1569230769231	0.171868319794784	2	12	porphyrin-containing compound metabolic process	7	darkturquoise
GO:0033013	0.0121586847163255	14.1569230769231	0.171868319794784	2	12	tetrapyrrole metabolic process	7	darkturquoise
GO:0045132	0.0142375535843249	12.8671328671329	0.186190679777683	2	13	meiotic chromosome segregation	7	darkturquoise
GO:0007143	0.0142375535843249	12.8671328671329	0.186190679777683	2	13	female meiosis	7	darkturquoise
GO:0048082	0.0143223599828982	Inf	0.0143223599828987	1	1	regulation of adult chitin-containing cuticle pigmentation	7	darkturquoise
GO:0048085	0.0143223599828982	Inf	0.0143223599828987	1	1	adult chitin-containing cuticle pigmentation	7	darkturquoise
GO:0048079	0.0143223599828982	Inf	0.0143223599828987	1	1	regulation of cuticle pigmentation	7	darkturquoise
GO:0048016	0.0143223599828982	Inf	0.0143223599828987	1	1	inositol phosphate-mediated signaling	7	darkturquoise
GO:0043489	0.0143223599828982	Inf	0.0143223599828987	1	1	RNA stabilization	7	darkturquoise
GO:0070328	0.0143223599828982	Inf	0.0143223599828987	1	1	triglyceride homeostasis	7	darkturquoise
GO:0015886	0.0143223599828982	Inf	0.0143223599828987	1	1	heme transport	7	darkturquoise
GO:0048255	0.0143223599828982	Inf	0.0143223599828987	1	1	mRNA stabilization	7	darkturquoise
GO:0055090	0.0143223599828982	Inf	0.0143223599828987	1	1	acylglycerol homeostasis	7	darkturquoise
GO:0031637	0.0143223599828982	Inf	0.0143223599828987	1	1	regulation of neuronal synaptic plasticity in response to neurotrophin	7	darkturquoise
GO:1901678	0.0143223599828982	Inf	0.0143223599828987	1	1	iron coordination entity transport	7	darkturquoise
GO:0007593	0.0143223599828982	Inf	0.0143223599828987	1	1	chitin-based cuticle sclerotization	7	darkturquoise
GO:0007564	0.0143223599828982	Inf	0.0143223599828987	1	1	regulation of chitin-based cuticle tanning	7	darkturquoise
GO:0021556	0.0143223599828982	Inf	0.0143223599828987	1	1	central nervous system formation	7	darkturquoise
GO:0006810	0.0153208151857376	1.86175414204611	14.0502351432236	22	981	transport	7	darkturquoise
GO:0009117	0.0179481781760314	3.11824206487618	2.10538691748611	6	147	nucleotide metabolic process	7	darkturquoise
GO:0044723	0.0199521282253394	3.46082949308756	1.57545959811885	5	110	single-organism carbohydrate metabolic process	7	darkturquoise
GO:0051234	0.0200795573286586	1.80436306092461	14.3939717828132	22	1005	establishment of localization	7	darkturquoise
GO:0044270	0.0208886450836123	4.118820861678	1.0598546387345	4	74	cellular nitrogen compound catabolic process	7	darkturquoise
GO:0009056	0.0217567763659995	2.38206162876009	4.16780675502351	9	291	catabolic process	7	darkturquoise
GO:0019439	0.0218329940714187	4.05991504583054	1.0741769987174	4	75	aromatic compound catabolic process	7	darkturquoise
GO:0006753	0.0226954279312751	2.94553856309825	2.21996579734929	6	155	nucleoside phosphate metabolic process	7	darkturquoise
GO:0046700	0.0228032273442484	4.0026455026455	1.0884993587003	4	76	heterocycle catabolic process	7	darkturquoise
GO:0006796	0.0232284084518759	1.98723537823039	7.94890979050876	14	555	phosphate-containing compound metabolic process	7	darkturquoise
GO:0006793	0.0252606360076156	1.96254009865131	8.03484395040616	14	561	phosphorus metabolic process	7	darkturquoise
GO:1901361	0.0258707859454899	3.84	1.131466438649	4	79	organic cyclic compound catabolic process	7	darkturquoise
GO:0006898	0.0266738869409181	8.83653846153846	0.257802479692176	2	18	receptor-mediated endocytosis	7	darkturquoise
GO:1901566	0.0274943208910692	2.80895334174023	2.32022231722959	6	162	organonitrogen compound biosynthetic process	7	darkturquoise
GO:0019637	0.0281167831366016	2.55970149253731	2.97905087644292	7	208	organophosphate metabolic process	7	darkturquoise
GO:0006200	0.0284426084073471	69.8484848484848	0.0286447199657974	1	2	ATP catabolic process	7	darkturquoise
GO:0006695	0.0284426084073471	69.8484848484848	0.0286447199657974	1	2	cholesterol biosynthetic process	7	darkturquoise
GO:0034030	0.0284426084073471	69.8484848484848	0.0286447199657974	1	2	ribonucleoside bisphosphate biosynthetic process	7	darkturquoise
GO:0034033	0.0284426084073471	69.8484848484848	0.0286447199657974	1	2	purine nucleoside bisphosphate biosynthetic process	7	darkturquoise
GO:0048067	0.0284426084073471	69.8484848484848	0.0286447199657974	1	2	cuticle pigmentation	7	darkturquoise
GO:0006933	0.0284426084073471	69.8484848484848	0.0286447199657974	1	2	negative regulation of cell adhesion involved in substrate-bound cell migration	7	darkturquoise
GO:0008203	0.0284426084073471	69.8484848484848	0.0286447199657974	1	2	cholesterol metabolic process	7	darkturquoise
GO:0022404	0.0284426084073471	69.8484848484848	0.0286447199657974	1	2	molting cycle process	7	darkturquoise
GO:0043487	0.0284426084073471	69.8484848484848	0.0286447199657974	1	2	regulation of RNA stability	7	darkturquoise
GO:0043488	0.0284426084073471	69.8484848484848	0.0286447199657974	1	2	regulation of mRNA stability	7	darkturquoise
GO:0055091	0.0284426084073471	69.8484848484848	0.0286447199657974	1	2	phospholipid homeostasis	7	darkturquoise
GO:0009180	0.0284426084073471	69.8484848484848	0.0286447199657974	1	2	purine ribonucleoside diphosphate biosynthetic process	7	darkturquoise
GO:0009188	0.0284426084073471	69.8484848484848	0.0286447199657974	1	2	ribonucleoside diphosphate biosynthetic process	7	darkturquoise
GO:0015937	0.0284426084073471	69.8484848484848	0.0286447199657974	1	2	coenzyme A biosynthetic process	7	darkturquoise
GO:0033866	0.0284426084073471	69.8484848484848	0.0286447199657974	1	2	nucleoside bisphosphate biosynthetic process	7	darkturquoise
GO:0046031	0.0284426084073471	69.8484848484848	0.0286447199657974	1	2	ADP metabolic process	7	darkturquoise
GO:0006172	0.0284426084073471	69.8484848484848	0.0286447199657974	1	2	ADP biosynthetic process	7	darkturquoise
GO:0006127	0.0284426084073471	69.8484848484848	0.0286447199657974	1	2	glycerophosphate shuttle	7	darkturquoise
GO:0044281	0.0291780475994511	2.07928033022254	5.85784523300556	11	409	small molecule metabolic process	7	darkturquoise
GO:0042440	0.0325237044905325	7.85128205128205	0.286447199657973	2	20	pigment metabolic process	7	darkturquoise
GO:0055086	0.0354577512232741	2.6338139443018	2.46344591705857	6	172	nucleobase-containing small molecule metabolic process	7	darkturquoise
GO:0051179	0.0379183204333313	1.65656337333553	16.1699444206926	23	1129	localization	7	darkturquoise
GO:0016126	0.0423635547796113	34.9166666666667	0.042967079948696	1	3	sterol biosynthetic process	7	darkturquoise
GO:0051307	0.0423635547796113	34.9166666666667	0.042967079948696	1	3	meiotic chromosome separation	7	darkturquoise
GO:0007377	0.0423635547796113	34.9166666666667	0.042967079948696	1	3	germ-band extension	7	darkturquoise
GO:0055081	0.0423635547796113	34.9166666666667	0.042967079948696	1	3	anion homeostasis	7	darkturquoise
GO:0009169	0.0423635547796113	34.9166666666667	0.042967079948696	1	3	purine ribonucleoside monophosphate catabolic process	7	darkturquoise
GO:0009158	0.0423635547796113	34.9166666666667	0.042967079948696	1	3	ribonucleoside monophosphate catabolic process	7	darkturquoise
GO:0009125	0.0423635547796113	34.9166666666667	0.042967079948696	1	3	nucleoside monophosphate catabolic process	7	darkturquoise
GO:0009128	0.0423635547796113	34.9166666666667	0.042967079948696	1	3	purine nucleoside monophosphate catabolic process	7	darkturquoise
GO:0009133	0.0423635547796113	34.9166666666667	0.042967079948696	1	3	nucleoside diphosphate biosynthetic process	7	darkturquoise
GO:0009136	0.0423635547796113	34.9166666666667	0.042967079948696	1	3	purine nucleoside diphosphate biosynthetic process	7	darkturquoise
GO:0007210	0.0423635547796113	34.9166666666667	0.042967079948696	1	3	serotonin receptor signaling pathway	7	darkturquoise
GO:0006090	0.0423635547796113	34.9166666666667	0.042967079948696	1	3	pyruvate metabolic process	7	darkturquoise
GO:0000712	0.0423635547796113	34.9166666666667	0.042967079948696	1	3	resolution of meiotic recombination intermediates	7	darkturquoise
GO:0000280	0.04631061344887	3.1536717251003	1.36062419837537	4	95	nuclear division	7	darkturquoise
GO:0048285	0.0478193607867842	3.11870255348516	1.37494655835827	4	96	organelle fission	7	darkturquoise
GO:0006812	0.0499876272206895	2.40739063490626	2.67828131680205	6	187	cation transport	7	darkturquoise
GOBPID	Pvalue	OddsRatio	ExpCount	Count	Size	GOTerm	ModuleNumber	ModuleColor
GO:0006637	0.00436747160474755	10.4621212121212	0.796066695168876	4	7	acyl-CoA metabolic process	8	darkorange
GO:0035383	0.00436747160474755	10.4621212121212	0.796066695168876	4	7	thioester metabolic process	8	darkorange
GO:0006120	0.00535703480778713	23.5066162570888	0.454895254382215	3	4	mitochondrial electron transport, NADH to ubiquinone	8	darkorange
GO:0045454	0.0113629854248817	3.44166666666667	2.61564771269773	7	23	cell redox homeostasis	8	darkorange
GO:0006084	0.0122628458805379	11.7504725897921	0.568619067977768	3	5	acetyl-CoA metabolic process	8	darkorange
GO:0006308	0.0122628458805379	11.7504725897921	0.568619067977768	3	5	DNA catabolic process	8	darkorange
GO:0046349	0.0129115554883983	Inf	0.227447627191107	2	2	amino sugar biosynthetic process	8	darkorange
GO:1901073	0.0129115554883983	Inf	0.227447627191107	2	2	glucosamine-containing compound biosynthetic process	8	darkorange
GO:0015695	0.0129115554883983	Inf	0.227447627191107	2	2	organic cation transport	8	darkorange
GO:0006012	0.0129115554883983	Inf	0.227447627191107	2	2	galactose metabolic process	8	darkorange
GO:0006031	0.0129115554883983	Inf	0.227447627191107	2	2	chitin biosynthetic process	8	darkorange
GO:0042775	0.0130464237411286	6.27424242424242	1.02351432235998	4	9	mitochondrial ATP synthesis coupled electron transport	8	darkorange
GO:0006412	0.0144625907850468	1.52380952380952	28.4309533988884	40	250	translation	8	darkorange
GO:0042157	0.0198197059172008	5.22727272727273	1.13723813595554	4	10	lipoprotein metabolic process	8	darkorange
GO:0042773	0.0198197059172008	5.22727272727273	1.13723813595554	4	10	ATP synthesis coupled electron transport	8	darkorange
GO:0051186	0.0199907633431168	2.09433368723212	7.05087644292433	13	62	cofactor metabolic process	8	darkorange
GO:0006801	0.0224695942525612	7.83175803402646	0.682342881573322	3	6	superoxide metabolic process	8	darkorange
GO:0051188	0.0276980253240751	2.36099426386233	4.43522873022659	9	39	cofactor biosynthetic process	8	darkorange
GO:0016254	0.0358077526889541	15.6415094339623	0.341171440786661	2	3	preassembly of GPI anchor in ER membrane	8	darkorange
GO:0071616	0.0358077526889541	15.6415094339623	0.341171440786661	2	3	acyl-CoA biosynthetic process	8	darkorange
GO:0001974	0.0358077526889541	15.6415094339623	0.341171440786661	2	3	blood vessel remodeling	8	darkorange
GO:0007257	0.0358077526889541	15.6415094339623	0.341171440786661	2	3	activation of JUN kinase activity	8	darkorange
GO:0035384	0.0358077526889541	15.6415094339623	0.341171440786661	2	3	thioester biosynthetic process	8	darkorange
GO:0032400	0.0360461862384215	5.87240075614367	0.796066695168876	3	7	melanosome localization	8	darkorange
GO:0032401	0.0360461862384215	5.87240075614367	0.796066695168876	3	7	establishment of melanosome localization	8	darkorange
GO:0032402	0.0360461862384215	5.87240075614367	0.796066695168876	3	7	melanosome transport	8	darkorange
GO:0051875	0.0360461862384215	5.87240075614367	0.796066695168876	3	7	pigment granule localization	8	darkorange
GO:0000187	0.0360461862384215	5.87240075614367	0.796066695168876	3	7	activation of MAPK activity	8	darkorange
GO:0018958	0.0360461862384215	5.87240075614367	0.796066695168876	3	7	phenol-containing compound metabolic process	8	darkorange
GO:0051904	0.0360461862384215	5.87240075614367	0.796066695168876	3	7	pigment granule transport	8	darkorange
GO:0051905	0.0360461862384215	5.87240075614367	0.796066695168876	3	7	establishment of pigment granule localization	8	darkorange
GO:0090305	0.038866152775432	3.91856060606061	1.36468576314664	4	12	nucleic acid phosphodiester bond hydrolysis	8	darkorange
GO:0006432	0.038866152775432	3.91856060606061	1.36468576314664	4	12	phenylalanyl-tRNA aminoacylation	8	darkorange
GO:0055114	0.0460113046147913	1.39276852180078	28.9995724668662	38	255	oxidation-reduction process	8	darkorange
GO:0019725	0.0475967340505326	1.92412028150992	6.36853356135101	11	56	cellular homeostasis	8	darkorange
GOBPID	Pvalue	OddsRatio	ExpCount	Count	Size	GOTerm	ModuleNumber	ModuleColor
GO:0006259	0.00189809841247615	2.2384926258332	9.9115006412997	20	239	DNA metabolic process	9	darkolivegreen
GO:0009755	0.00499342647787447	46.6979166666667	0.124412141941	2	3	hormone-mediated signaling pathway	9	darkolivegreen
GO:0006974	0.00672922795721324	2.58234222650809	4.68619067977768	11	113	cellular response to DNA damage stimulus	9	darkolivegreen
GO:0006950	0.0076567174118016	1.94666666666667	11.19709277469	20	270	response to stress	9	darkolivegreen
GO:0032481	0.00971439311571001	23.34375	0.165882855921334	2	4	positive regulation of type I interferon production	9	darkolivegreen
GO:0032479	0.00971439311571001	23.34375	0.165882855921334	2	4	regulation of type I interferon production	9	darkolivegreen
GO:0030422	0.00971439311571001	23.34375	0.165882855921334	2	4	production of siRNA involved in RNA interference	9	darkolivegreen
GO:0032728	0.00971439311571001	23.34375	0.165882855921334	2	4	positive regulation of interferon-beta production	9	darkolivegreen
GO:0032648	0.00971439311571001	23.34375	0.165882855921334	2	4	regulation of interferon-beta production	9	darkolivegreen
GO:0032606	0.00971439311571001	23.34375	0.165882855921334	2	4	type I interferon production	9	darkolivegreen
GO:0032608	0.00971439311571001	23.34375	0.165882855921334	2	4	interferon-beta production	9	darkolivegreen
GO:0042147	0.00971439311571001	23.34375	0.165882855921334	2	4	retrograde transport, endosome to Golgi	9	darkolivegreen
GO:0006297	0.00971439311571001	23.34375	0.165882855921334	2	4	nucleotide-excision repair, DNA gap filling	9	darkolivegreen
GO:0007608	0.011708904148009	7.80977312390925	0.497648567764002	3	12	sensory perception of smell	9	darkolivegreen
GO:0044710	0.0121805918447479	1.48446135299735	39.7704147071398	53	959	single-organism metabolic process	9	darkolivegreen
GO:0033554	0.0161920643695754	2.08962141718269	6.71825566481402	13	162	cellular response to stress	9	darkolivegreen
GO:0055114	0.0177713385904192	1.83271001150748	10.575032064985	18	255	oxidation-reduction process	9	darkolivegreen
GO:0000077	0.0220996989649612	5.85340314136126	0.622060709705002	3	15	DNA damage checkpoint	9	darkolivegreen
GO:0031570	0.0220996989649612	5.85340314136126	0.622060709705002	3	15	DNA integrity checkpoint	9	darkolivegreen
GO:0007606	0.0220996989649612	5.85340314136126	0.622060709705002	3	15	sensory perception of chemical stimulus	9	darkolivegreen
GO:0010458	0.0229855004034081	11.6666666666667	0.248824283882001	2	6	exit from mitosis	9	darkolivegreen
GO:0009615	0.0229855004034081	11.6666666666667	0.248824283882001	2	6	response to virus	9	darkolivegreen
GO:0033365	0.0232112048691503	2.94946808510638	2.23941855493801	6	54	protein localization to organelle	9	darkolivegreen
GO:0006289	0.0310849167683294	5.0149588631264	0.705002137665669	3	17	nucleotide-excision repair	9	darkolivegreen
GO:0032200	0.0313107720669376	9.33125	0.290294997862334	2	7	telomere organization	9	darkolivegreen
GO:0031050	0.0313107720669376	9.33125	0.290294997862334	2	7	dsRNA fragmentation	9	darkolivegreen
GO:0043331	0.0313107720669376	9.33125	0.290294997862334	2	7	response to dsRNA	9	darkolivegreen
GO:0000723	0.0313107720669376	9.33125	0.290294997862334	2	7	telomere maintenance	9	darkolivegreen
GO:0071359	0.0313107720669376	9.33125	0.290294997862334	2	7	cellular response to dsRNA	9	darkolivegreen
GO:0070918	0.0313107720669376	9.33125	0.290294997862334	2	7	production of small RNA involved in gene silencing by RNA	9	darkolivegreen
GO:0006396	0.0342203183765052	1.81763285024155	8.21120136810603	14	198	RNA processing	9	darkolivegreen
GO:0008152	0.0398364686588968	1.33173133974131	122.048311244121	134	2943	metabolic process	9	darkolivegreen
GO:0006383	0.0406243466928793	7.77430555555556	0.331765711842668	2	8	transcription from RNA polymerase III promoter	9	darkolivegreen
GO:0006231	0.0414707139803339	Inf	0.0414707139803335	1	1	dTMP biosynthetic process	9	darkolivegreen
GO:1902017	0.0414707139803339	Inf	0.0414707139803335	1	1	regulation of cilium assembly	9	darkolivegreen
GO:0032369	0.0414707139803339	Inf	0.0414707139803335	1	1	negative regulation of lipid transport	9	darkolivegreen
GO:0032465	0.0414707139803339	Inf	0.0414707139803335	1	1	regulation of cytokinesis	9	darkolivegreen
GO:0008062	0.0414707139803339	Inf	0.0414707139803335	1	1	eclosion rhythm	9	darkolivegreen
GO:0008053	0.0414707139803339	Inf	0.0414707139803335	1	1	mitochondrial fusion	9	darkolivegreen
GO:0035929	0.0414707139803339	Inf	0.0414707139803335	1	1	steroid hormone secretion	9	darkolivegreen
GO:0006553	0.0414707139803339	Inf	0.0414707139803335	1	1	lysine metabolic process	9	darkolivegreen
GO:0006554	0.0414707139803339	Inf	0.0414707139803335	1	1	lysine catabolic process	9	darkolivegreen
GO:0006556	0.0414707139803339	Inf	0.0414707139803335	1	1	S-adenosylmethionine biosynthetic process	9	darkolivegreen
GO:0035930	0.0414707139803339	Inf	0.0414707139803335	1	1	corticosteroid hormone secretion	9	darkolivegreen
GO:0035933	0.0414707139803339	Inf	0.0414707139803335	1	1	glucocorticoid secretion	9	darkolivegreen
GO:0030150	0.0414707139803339	Inf	0.0414707139803335	1	1	protein import into mitochondrial matrix	9	darkolivegreen
GO:0006622	0.0414707139803339	Inf	0.0414707139803335	1	1	protein targeting to lysosome	9	darkolivegreen
GO:0006623	0.0414707139803339	Inf	0.0414707139803335	1	1	protein targeting to vacuole	9	darkolivegreen
GO:0006624	0.0414707139803339	Inf	0.0414707139803335	1	1	vacuolar protein processing	9	darkolivegreen
GO:0098534	0.0414707139803339	Inf	0.0414707139803335	1	1	centriole assembly	9	darkolivegreen
GO:0030252	0.0414707139803339	Inf	0.0414707139803335	1	1	growth hormone secretion	9	darkolivegreen
GO:0060986	0.0414707139803339	Inf	0.0414707139803335	1	1	endocrine hormone secretion	9	darkolivegreen
GO:1902117	0.0414707139803339	Inf	0.0414707139803335	1	1	positive regulation of organelle assembly	9	darkolivegreen
GO:0045088	0.0414707139803339	Inf	0.0414707139803335	1	1	regulation of innate immune response	9	darkolivegreen
GO:0045089	0.0414707139803339	Inf	0.0414707139803335	1	1	positive regulation of innate immune response	9	darkolivegreen
GO:0045071	0.0414707139803339	Inf	0.0414707139803335	1	1	negative regulation of viral genome replication	9	darkolivegreen
GO:0050886	0.0414707139803339	Inf	0.0414707139803335	1	1	endocrine process	9	darkolivegreen
GO:0046548	0.0414707139803339	Inf	0.0414707139803335	1	1	retinal rod cell development	9	darkolivegreen
GO:0046500	0.0414707139803339	Inf	0.0414707139803335	1	1	S-adenosylmethionine metabolic process	9	darkolivegreen
GO:0008272	0.0414707139803339	Inf	0.0414707139803335	1	1	sulfate transport	9	darkolivegreen
GO:0007099	0.0414707139803339	Inf	0.0414707139803335	1	1	centriole replication	9	darkolivegreen
GO:0034454	0.0414707139803339	Inf	0.0414707139803335	1	1	microtubule anchoring at centrosome	9	darkolivegreen
GO:0051462	0.0414707139803339	Inf	0.0414707139803335	1	1	regulation of cortisol secretion	9	darkolivegreen
GO:0051463	0.0414707139803339	Inf	0.0414707139803335	1	1	negative regulation of cortisol secretion	9	darkolivegreen
GO:0051457	0.0414707139803339	Inf	0.0414707139803335	1	1	maintenance of protein location in nucleus	9	darkolivegreen
GO:0072393	0.0414707139803339	Inf	0.0414707139803335	1	1	microtubule anchoring at microtubule organizing center	9	darkolivegreen
GO:0043400	0.0414707139803339	Inf	0.0414707139803335	1	1	cortisol secretion	9	darkolivegreen
GO:0046946	0.0414707139803339	Inf	0.0414707139803335	1	1	hydroxylysine metabolic process	9	darkolivegreen
GO:0046948	0.0414707139803339	Inf	0.0414707139803335	1	1	hydroxylysine catabolic process	9	darkolivegreen
GO:1901421	0.0414707139803339	Inf	0.0414707139803335	1	1	positive regulation of response to alcohol	9	darkolivegreen
GO:1901419	0.0414707139803339	Inf	0.0414707139803335	1	1	regulation of response to alcohol	9	darkolivegreen
GO:0035096	0.0414707139803339	Inf	0.0414707139803335	1	1	larval midgut cell programmed cell death	9	darkolivegreen
GO:0035069	0.0414707139803339	Inf	0.0414707139803335	1	1	larval midgut histolysis	9	darkolivegreen
GO:0045724	0.0414707139803339	Inf	0.0414707139803335	1	1	positive regulation of cilium assembly	9	darkolivegreen
GO:0019310	0.0414707139803339	Inf	0.0414707139803335	1	1	inositol catabolic process	9	darkolivegreen
GO:0007172	0.0414707139803339	Inf	0.0414707139803335	1	1	signal complex assembly	9	darkolivegreen
GO:0045804	0.0414707139803339	Inf	0.0414707139803335	1	1	negative regulation of eclosion	9	darkolivegreen
GO:0019307	0.0414707139803339	Inf	0.0414707139803335	1	1	mannose biosynthetic process	9	darkolivegreen
GO:0048525	0.0414707139803339	Inf	0.0414707139803335	1	1	negative regulation of viral process	9	darkolivegreen
GO:0009787	0.0414707139803339	Inf	0.0414707139803335	1	1	regulation of abscisic acid-activated signaling pathway	9	darkolivegreen
GO:0009789	0.0414707139803339	Inf	0.0414707139803335	1	1	positive regulation of abscisic acid-activated signaling pathway	9	darkolivegreen
GO:0009737	0.0414707139803339	Inf	0.0414707139803335	1	1	response to abscisic acid	9	darkolivegreen
GO:0009738	0.0414707139803339	Inf	0.0414707139803335	1	1	abscisic acid-activated signaling pathway	9	darkolivegreen
GO:0072665	0.0414707139803339	Inf	0.0414707139803335	1	1	protein localization to vacuole	9	darkolivegreen
GO:0072666	0.0414707139803339	Inf	0.0414707139803335	1	1	establishment of protein localization to vacuole	9	darkolivegreen
GO:0007563	0.0414707139803339	Inf	0.0414707139803335	1	1	regulation of eclosion	9	darkolivegreen
GO:0043901	0.0414707139803339	Inf	0.0414707139803335	1	1	negative regulation of multi-organism process	9	darkolivegreen
GO:0060123	0.0414707139803339	Inf	0.0414707139803335	1	1	regulation of growth hormone secretion	9	darkolivegreen
GO:0060125	0.0414707139803339	Inf	0.0414707139803335	1	1	negative regulation of growth hormone secretion	9	darkolivegreen
GO:0019520	0.0414707139803339	Inf	0.0414707139803335	1	1	aldonic acid metabolic process	9	darkolivegreen
GO:0019521	0.0414707139803339	Inf	0.0414707139803335	1	1	D-gluconate metabolic process	9	darkolivegreen
GO:0006474	0.0414707139803339	Inf	0.0414707139803335	1	1	N-terminal protein amino acid acetylation	9	darkolivegreen
GO:0071229	0.0414707139803339	Inf	0.0414707139803335	1	1	cellular response to acid	9	darkolivegreen
GO:0071215	0.0414707139803339	Inf	0.0414707139803335	1	1	cellular response to abscisic acid stimulus	9	darkolivegreen
GO:2000850	0.0414707139803339	Inf	0.0414707139803335	1	1	negative regulation of glucocorticoid secretion	9	darkolivegreen
GO:0046073	0.0414707139803339	Inf	0.0414707139803335	1	1	dTMP metabolic process	9	darkolivegreen
GO:0044060	0.0414707139803339	Inf	0.0414707139803335	1	1	regulation of endocrine process	9	darkolivegreen
GO:2000846	0.0414707139803339	Inf	0.0414707139803335	1	1	regulation of corticosteroid hormone secretion	9	darkolivegreen
GO:2000847	0.0414707139803339	Inf	0.0414707139803335	1	1	negative regulation of corticosteroid hormone secretion	9	darkolivegreen
GO:2000849	0.0414707139803339	Inf	0.0414707139803335	1	1	regulation of glucocorticoid secretion	9	darkolivegreen
GO:2000831	0.0414707139803339	Inf	0.0414707139803335	1	1	regulation of steroid hormone secretion	9	darkolivegreen
GO:2000832	0.0414707139803339	Inf	0.0414707139803335	1	1	negative regulation of steroid hormone secretion	9	darkolivegreen
GO:0016480	0.0414707139803339	Inf	0.0414707139803335	1	1	negative regulation of transcription from RNA polymerase III promoter	9	darkolivegreen
GO:0007005	0.0417011866572882	4.38612565445026	0.787943565626336	3	19	mitochondrion organization	9	darkolivegreen
GO:0006281	0.0417180619773993	2.32665511787301	3.23471569046601	7	78	DNA repair	9	darkolivegreen
GO:0045087	0.0476064958581159	4.12719433323067	0.829414279606669	3	20	innate immune response	9	darkolivegreen
GOBPID	Pvalue	OddsRatio	ExpCount	Count	Size	GOTerm	ModuleNumber	ModuleColor
GO:0006412	5.39314182163042e-12	2.55417544637906	60.0684053014109	108	250	translation	10	red
GO:0019538	1.26476225864719e-08	1.56658691062632	243.156904660111	312	1012	protein metabolic process	10	red
GO:0044267	4.92220344183933e-08	1.57605160020945	205.914493373236	268	857	cellular protein metabolic process	10	red
GO:0034645	2.25052826341383e-06	1.50633842097257	184.77041470714	236	769	cellular macromolecule biosynthetic process	10	red
GO:0009059	6.04602107626179e-06	1.47691233669093	186.932877297991	236	778	macromolecule biosynthetic process	10	red
GO:1901576	2.09718765425144e-05	1.39409290830089	246.280461735785	297	1025	organic substance biosynthetic process	10	red
GO:0010467	2.7366136786231e-05	1.38143078013271	256.371953826422	307	1067	gene expression	10	red
GO:0071897	8.83571422834687e-05	14.3354260089686	2.64300983326208	9	11	DNA biosynthetic process	10	red
GO:0044260	0.000426204412682892	1.26963789658365	396.691748610517	444	1651	cellular macromolecule metabolic process	10	red
GO:0030099	0.00102710106408799	11.129811996419	2.16246259085079	7	9	myeloid cell differentiation	10	red
GO:0006277	0.00102710106408799	11.129811996419	2.16246259085079	7	9	DNA amplification	10	red
GO:0065003	0.0011664929997287	1.79528541226216	32.9174861051732	49	137	macromolecular complex assembly	10	red
GO:0009058	0.00139994139765117	1.25410175996877	316.920906370244	357	1319	biosynthetic process	10	red
GO:0044249	0.00203892840924736	1.24710680346293	302.023941855494	340	1257	cellular biosynthetic process	10	red
GO:0022607	0.00220196280596749	1.49835753441855	64.6336041043181	85	269	cellular component assembly	10	red
GO:0044085	0.00237857601285931	1.46602883429228	71.8418127404874	93	299	cellular component biogenesis	10	red
GO:0006461	0.00254566271343195	1.80524671447906	27.3911928174434	41	114	protein complex assembly	10	red
GO:0070271	0.00302317901399587	1.86361480075901	23.5468148781531	36	98	protein complex biogenesis	10	red
GO:0030001	0.00483251350438824	1.68298059964727	30.7550235143224	44	128	metal ion transport	10	red
GO:0043170	0.00778249829982399	1.18583245044246	449.792218896965	485	1872	macromolecule metabolic process	10	red
GO:0006270	0.00806851287202165	6.35241502683363	2.16246259085079	6	9	DNA replication initiation	10	red
GO:0051604	0.011092034451407	1.43846105329549	52.1393758016246	67	217	protein maturation	10	red
GO:0016485	0.011092034451407	1.43846105329549	52.1393758016246	67	217	protein processing	10	red
GO:0044238	0.0130758830790196	1.16718969433223	543.018383924754	576	2260	primary metabolic process	10	red
GO:0030218	0.0134154140692651	12.6892857142857	1.20136810602822	4	5	erythrocyte differentiation	10	red
GO:0050731	0.0134154140692651	12.6892857142857	1.20136810602822	4	5	positive regulation of peptidyl-tyrosine phosphorylation	10	red
GO:0007307	0.0134154140692651	12.6892857142857	1.20136810602822	4	5	eggshell chorion gene amplification	10	red
GO:0007059	0.0136877320832943	2.2169204206561	9.37067122702009	16	39	chromosome segregation	10	red
GO:0034101	0.0138432108732612	Inf	0.72082086361693	3	3	erythrocyte homeostasis	10	red
GO:0045116	0.0138432108732612	Inf	0.72082086361693	3	3	protein neddylation	10	red
GO:0043277	0.0138432108732612	Inf	0.72082086361693	3	3	apoptotic cell clearance	10	red
GO:0034599	0.0138432108732612	Inf	0.72082086361693	3	3	cellular response to oxidative stress	10	red
GO:0002262	0.0138432108732612	Inf	0.72082086361693	3	3	myeloid cell homeostasis	10	red
GO:0021871	0.0138432108732612	Inf	0.72082086361693	3	3	forebrain regionalization	10	red
GO:0021511	0.0138432108732612	Inf	0.72082086361693	3	3	spinal cord patterning	10	red
GO:0008654	0.0156869611874856	2.69203123920105	5.76656690893544	11	24	phospholipid biosynthetic process	10	red
GO:0006613	0.0161015135134778	4.76296958855098	2.40273621205643	6	10	cotranslational protein targeting to membrane	10	red
GO:0070972	0.0161015135134778	4.76296958855098	2.40273621205643	6	10	protein localization to endoplasmic reticulum	10	red
GO:0007040	0.0194485797214756	3.70575947478365	3.12355707567336	7	13	lysosome organization	10	red
GO:0045017	0.0213180891582742	3.17741935483871	3.8443779392903	8	16	glycerolipid biosynthetic process	10	red
GO:0051124	0.0213180891582742	3.17741935483871	3.8443779392903	8	16	synaptic growth at neuromuscular junction	10	red
GO:0090150	0.0221754632371212	2.86062780269058	4.56519880290723	9	19	establishment of protein localization to membrane	10	red
GO:0006367	0.0221754632371212	2.86062780269058	4.56519880290723	9	19	transcription initiation from RNA polymerase II promoter	10	red
GO:0043933	0.0228878410350925	1.3714996776118	53.8212911500641	67	224	macromolecular complex subunit organization	10	red
GO:0007270	0.0229651785437359	5.28894846589217	1.92218896964515	5	8	neuron-neuron synaptic transmission	10	red
GO:0006812	0.0236520946689105	1.40702184413525	44.9311671654553	57	187	cation transport	10	red
GO:0055085	0.0270786280453347	1.3588047113567	53.3407439076528	66	222	transmembrane transport	10	red
GO:0044257	0.0280688521287166	1.70133333333333	16.5788798631894	24	69	cellular protein catabolic process	10	red
GO:0071822	0.0284705152708883	1.37513426423201	48.0547242411287	60	200	protein complex subunit organization	10	red
GO:0006814	0.0288499335463671	2.24523910283538	6.96793501496366	12	29	sodium ion transport	10	red
GO:0006508	0.030640714724957	1.37132748179901	47.3339033775118	59	197	proteolysis	10	red
GO:0006612	0.0309783134150014	3.17547000895255	3.36383069687901	7	14	protein targeting to membrane	10	red
GO:0006261	0.0312397573460451	2.44510426736639	5.5262932877298	10	23	DNA-dependent DNA replication	10	red
GO:0034622	0.0316355793461541	1.54867354867355	23.5468148781531	32	98	cellular macromolecular complex assembly	10	red
GO:0051783	0.0319252171996645	2.59983693436608	4.80547242411287	9	20	regulation of nuclear division	10	red
GO:0072657	0.0319252171996645	2.59983693436608	4.80547242411287	9	20	protein localization to membrane	10	red
GO:0008582	0.0319689542498304	2.82357626443648	4.08465156049594	8	17	regulation of synaptic growth at neuromuscular junction	10	red
GO:0006777	0.032606032650752	6.34285714285714	1.44164172723386	4	6	Mo-molybdopterin cofactor biosynthetic process	10	red
GO:0032324	0.032606032650752	6.34285714285714	1.44164172723386	4	6	molybdopterin cofactor biosynthetic process	10	red
GO:0007030	0.032606032650752	6.34285714285714	1.44164172723386	4	6	Golgi organization	10	red
GO:0048872	0.032606032650752	6.34285714285714	1.44164172723386	4	6	homeostasis of number of cells	10	red
GO:0019720	0.032606032650752	6.34285714285714	1.44164172723386	4	6	Mo-molybdopterin cofactor metabolic process	10	red
GO:0007346	0.0333053470410549	2.02489762489762	8.64985036340316	14	36	regulation of mitotic cell cycle	10	red
GO:0010564	0.0333053470410549	2.02489762489762	8.64985036340316	14	36	regulation of cell cycle process	10	red
GO:0000280	0.0343468262917618	1.54663197621226	22.8259940145361	31	95	nuclear division	10	red
GO:0071824	0.037876001000998	2.11990407673861	7.2082086361693	12	30	protein-DNA complex subunit organization	10	red
GO:0048285	0.0394510037106507	1.5224012949539	23.0662676357418	31	96	organelle fission	10	red
GO:0016226	0.0415860106333788	3.96559428060769	2.16246259085079	5	9	iron-sulfur cluster assembly	10	red
GO:0006614	0.0415860106333788	3.96559428060769	2.16246259085079	5	9	SRP-dependent cotranslational protein targeting to membrane	10	red
GO:0045047	0.0415860106333788	3.96559428060769	2.16246259085079	5	9	protein targeting to ER	10	red
GO:0000096	0.0415860106333788	3.96559428060769	2.16246259085079	5	9	sulfur amino acid metabolic process	10	red
GO:0031163	0.0415860106333788	3.96559428060769	2.16246259085079	5	9	metallo-sulfur cluster assembly	10	red
GO:0072599	0.0415860106333788	3.96559428060769	2.16246259085079	5	9	establishment of protein localization to endoplasmic reticulum	10	red
GO:0006275	0.0415860106333788	3.96559428060769	2.16246259085079	5	9	regulation of DNA replication	10	red
GO:0008345	0.0454146150081725	9.50847457627119	0.961094484822574	3	4	larval locomotory behavior	10	red
GO:0044837	0.0454146150081725	9.50847457627119	0.961094484822574	3	4	actomyosin contractile ring organization	10	red
GO:0006939	0.0454146150081725	9.50847457627119	0.961094484822574	3	4	smooth muscle contraction	10	red
GO:0003205	0.0454146150081725	9.50847457627119	0.961094484822574	3	4	cardiac chamber development	10	red
GO:0003206	0.0454146150081725	9.50847457627119	0.961094484822574	3	4	cardiac chamber morphogenesis	10	red
GO:0007020	0.0454146150081725	9.50847457627119	0.961094484822574	3	4	microtubule nucleation	10	red
GO:0051289	0.0454146150081725	9.50847457627119	0.961094484822574	3	4	protein homotetramerization	10	red
GO:0007100	0.0454146150081725	9.50847457627119	0.961094484822574	3	4	mitotic centrosome separation	10	red
GO:0007586	0.0454146150081725	9.50847457627119	0.961094484822574	3	4	digestion	10	red
GO:0051961	0.0454146150081725	9.50847457627119	0.961094484822574	3	4	negative regulation of nervous system development	10	red
GO:0051964	0.0454146150081725	9.50847457627119	0.961094484822574	3	4	negative regulation of synapse assembly	10	red
GO:0000912	0.0454146150081725	9.50847457627119	0.961094484822574	3	4	assembly of actomyosin apparatus involved in cytokinesis	10	red
GO:0000915	0.0454146150081725	9.50847457627119	0.961094484822574	3	4	actomyosin contractile ring assembly	10	red
GO:0006996	0.0479002992953631	1.20560890713047	117.49380076956	133	489	organelle organization	10	red
GO:0006333	0.0487180749613573	2.0077622112836	7.44848225737495	12	31	chromatin assembly or disassembly	10	red
GO:0006457	0.0499954889944896	1.74522831249818	11.5331338178709	17	48	protein folding	10	red
GOBPID	Pvalue	OddsRatio	ExpCount	Count	Size	GOTerm	ModuleNumber	ModuleColor
GO:0000087	0.00812312954253946	Inf	0.00812312954253955	1	1	mitotic M phase	11	orange
GO:0042069	0.00812312954253946	Inf	0.00812312954253955	1	1	regulation of catecholamine metabolic process	11	orange
GO:0042053	0.00812312954253946	Inf	0.00812312954253955	1	1	regulation of dopamine metabolic process	11	orange
GO:0042416	0.00812312954253946	Inf	0.00812312954253955	1	1	dopamine biosynthetic process	11	orange
GO:0033238	0.00812312954253946	Inf	0.00812312954253955	1	1	regulation of cellular amine metabolic process	11	orange
GO:0006909	0.0128713135417136	6.77142857142857	0.495510902094912	3	61	phagocytosis	11	orange
GO:0048675	0.0133993277263052	12.8333333333333	0.17870884993587	2	22	axon extension	11	orange
GO:1990138	0.0133993277263052	12.8333333333333	0.17870884993587	2	22	neuron projection extension	11	orange
GO:0046189	0.0161819965678511	125.378378378378	0.0162462590850791	1	2	phenol-containing compound biosynthetic process	11	orange
GO:0007462	0.0161819965678511	125.378378378378	0.0162462590850791	1	2	R1/R6 cell fate commitment	11	orange
GO:0007175	0.0161819965678511	125.378378378378	0.0162462590850791	1	2	negative regulation of epidermal growth factor-activated receptor activity	11	orange
GO:0009713	0.0161819965678511	125.378378378378	0.0162462590850791	1	2	catechol-containing compound biosynthetic process	11	orange
GO:0035187	0.0161819965678511	125.378378378378	0.0162462590850791	1	2	hatching behavior	11	orange
GO:0035188	0.0161819965678511	125.378378378378	0.0162462590850791	1	2	hatching	11	orange
GO:0042423	0.0161819965678511	125.378378378378	0.0162462590850791	1	2	catecholamine biosynthetic process	11	orange
GO:0042417	0.0161819965678511	125.378378378378	0.0162462590850791	1	2	dopamine metabolic process	11	orange
GO:0007503	0.0161819965678511	125.378378378378	0.0162462590850791	1	2	fat body development	11	orange
GO:2000272	0.0161819965678511	125.378378378378	0.0162462590850791	1	2	negative regulation of receptor activity	11	orange
GO:0061099	0.0161819965678511	125.378378378378	0.0162462590850791	1	2	negative regulation of protein tyrosine kinase activity	11	orange
GO:0006865	0.0171379113757104	11.1521739130435	0.203078238563489	2	25	amino acid transport	11	orange
GO:0042067	0.019848446694822	10.2555555555556	0.219324497648568	2	27	establishment of ommatidial planar polarity	11	orange
GO:0007619	0.0212669059778318	9.85897435897436	0.227447627191107	2	28	courtship behavior	11	orange
GO:0060560	0.0227265124429103	9.4917695473251	0.235570756733647	2	29	developmental growth involved in morphogenesis	11	orange
GO:0042684	0.0241770958258541	62.6756756756757	0.0243693886276186	1	3	cardioblast cell fate commitment	11	orange
GO:0001742	0.0241770958258541	62.6756756756757	0.0243693886276186	1	3	oenocyte differentiation	11	orange
GO:0060911	0.0241770958258541	62.6756756756757	0.0243693886276186	1	3	cardiac cell fate commitment	11	orange
GO:0060913	0.0241770958258541	62.6756756756757	0.0243693886276186	1	3	cardiac cell fate determination	11	orange
GO:0048052	0.0241770958258541	62.6756756756757	0.0243693886276186	1	3	R1/R6 cell differentiation	11	orange
GO:0007438	0.0241770958258541	62.6756756756757	0.0243693886276186	1	3	oenocyte development	11	orange
GO:0007176	0.0241770958258541	62.6756756756757	0.0243693886276186	1	3	regulation of epidermal growth factor-activated receptor activity	11	orange
GO:0007217	0.0241770958258541	62.6756756756757	0.0243693886276186	1	3	tachykinin receptor signaling pathway	11	orange
GO:0010469	0.0241770958258541	62.6756756756757	0.0243693886276186	1	3	regulation of receptor activity	11	orange
GO:0007510	0.0241770958258541	62.6756756756757	0.0243693886276186	1	3	cardioblast cell fate determination	11	orange
GO:0061097	0.0241770958258541	62.6756756756757	0.0243693886276186	1	3	regulation of protein tyrosine kinase activity	11	orange
GO:0048588	0.0242265414359257	9.15079365079365	0.243693886276186	2	30	developmental cell growth	11	orange
GO:0007617	0.0289620442465042	8.25985663082437	0.268063274903805	2	33	mating behavior	11	orange
GO:0007618	0.0306166858278134	8	0.276186404446345	2	34	mating	11	orange
GO:0008069	0.0321089183624566	41.7747747747748	0.0324925181701582	1	4	dorsal/ventral axis specification, ovarian follicular epithelium	11	orange
GO:0071684	0.0321089183624566	41.7747747747748	0.0324925181701582	1	4	organism emergence from protective structure	11	orange
GO:0008078	0.0321089183624566	41.7747747747748	0.0324925181701582	1	4	mesodermal cell migration	11	orange
GO:0001661	0.0321089183624566	41.7747747747748	0.0324925181701582	1	4	conditioned taste aversion	11	orange
GO:0050732	0.0321089183624566	41.7747747747748	0.0324925181701582	1	4	negative regulation of peptidyl-tyrosine phosphorylation	11	orange
GO:0046958	0.0321089183624566	41.7747747747748	0.0324925181701582	1	4	nonassociative learning	11	orange
GO:0007366	0.0321089183624566	41.7747747747748	0.0324925181701582	1	4	periodic partitioning by pair rule gene	11	orange
GO:1901185	0.0321089183624566	41.7747747747748	0.0324925181701582	1	4	negative regulation of ERBB signaling pathway	11	orange
GO:0042059	0.0321089183624566	41.7747747747748	0.0324925181701582	1	4	negative regulation of epidermal growth factor receptor signaling pathway	11	orange
GO:0019228	0.0321089183624566	41.7747747747748	0.0324925181701582	1	4	neuronal action potential	11	orange
GO:0060361	0.0321089183624566	41.7747747747748	0.0324925181701582	1	4	flight	11	orange
GO:0016486	0.0321089183624566	41.7747747747748	0.0324925181701582	1	4	peptide hormone processing	11	orange
GO:0055085	0.0321878960290338	3.08825583019131	1.80333475844378	5	222	transmembrane transport	11	orange
GO:0046942	0.0323082526969366	7.75589225589226	0.284309533988884	2	35	carboxylic acid transport	11	orange
GO:0015849	0.0323082526969366	7.75589225589226	0.284309533988884	2	35	organic acid transport	11	orange
GO:0007163	0.0328237876822618	4.64897959183673	0.706712270200941	3	87	establishment or maintenance of cell polarity	11	orange
GO:0044705	0.0340360700298715	7.52614379084967	0.292432663531424	2	36	multi-organism reproductive behavior	11	orange
GO:0019098	0.0340360700298715	7.52614379084967	0.292432663531424	2	36	reproductive behavior	11	orange
GO:0001736	0.0357994710200723	7.30952380952381	0.300555793073963	2	37	establishment of planar polarity	11	orange
GO:0007164	0.0357994710200723	7.30952380952381	0.300555793073963	2	37	establishment of tissue polarity	11	orange
GO:0051129	0.0375977967982533	7.10493827160494	0.308678922616503	2	38	negative regulation of cellular component organization	11	orange
GO:0040011	0.0385122062060709	2.93195108984583	1.89268918341171	5	233	locomotion	11	orange
GO:0002165	0.0386744748207775	3.40417457305503	1.29157759726379	4	159	instar larval or pupal development	11	orange
GO:0006563	0.0399779515465021	31.3243243243243	0.0406156477126977	1	5	L-serine metabolic process	11	orange
GO:0008366	0.0399779515465021	31.3243243243243	0.0406156477126977	1	5	axon ensheathment	11	orange
GO:0050774	0.0399779515465021	31.3243243243243	0.0406156477126977	1	5	negative regulation of dendrite morphogenesis	11	orange
GO:1901184	0.0399779515465021	31.3243243243243	0.0406156477126977	1	5	regulation of ERBB signaling pathway	11	orange
GO:0007412	0.0399779515465021	31.3243243243243	0.0406156477126977	1	5	axon target recognition	11	orange
GO:0042058	0.0399779515465021	31.3243243243243	0.0406156477126977	1	5	regulation of epidermal growth factor receptor signaling pathway	11	orange
GO:0042074	0.0399779515465021	31.3243243243243	0.0406156477126977	1	5	cell migration involved in gastrulation	11	orange
GO:0007272	0.0399779515465021	31.3243243243243	0.0406156477126977	1	5	ensheathment of neurons	11	orange
GO:1900076	0.0477846790965195	25.0540540540541	0.0487387772552373	1	6	regulation of cellular response to insulin stimulus	11	orange
GO:0016180	0.0477846790965195	25.0540540540541	0.0487387772552373	1	6	snRNA processing	11	orange
GO:0006584	0.0477846790965195	25.0540540540541	0.0487387772552373	1	6	catecholamine metabolic process	11	orange
GO:0006544	0.0477846790965195	25.0540540540541	0.0487387772552373	1	6	glycine metabolic process	11	orange
GO:0001508	0.0477846790965195	25.0540540540541	0.0487387772552373	1	6	action potential	11	orange
GO:0046626	0.0477846790965195	25.0540540540541	0.0487387772552373	1	6	regulation of insulin receptor signaling pathway	11	orange
GO:0031290	0.0477846790965195	25.0540540540541	0.0487387772552373	1	6	retinal ganglion cell axon guidance	11	orange
GO:0048134	0.0477846790965195	25.0540540540541	0.0487387772552373	1	6	germ-line cyst formation	11	orange
GO:0009712	0.0477846790965195	25.0540540540541	0.0487387772552373	1	6	catechol-containing compound metabolic process	11	orange
GO:0016073	0.0477846790965195	25.0540540540541	0.0487387772552373	1	6	snRNA metabolic process	11	orange
GO:0007614	0.0477846790965195	25.0540540540541	0.0487387772552373	1	6	short-term memory	11	orange
GO:0015711	0.0490852555521624	6.08201058201058	0.35741769987174	2	44	organic anion transport	11	orange
GOBPID	Pvalue	OddsRatio	ExpCount	Count	Size	GOTerm	ModuleNumber	ModuleColor
GO:0048731	3.33741463505811e-07	1.97560975609756	54.856776400171	90	705	system development	12	purple
GO:0065007	5.74267586196013e-07	1.71669793621013	138.659256092347	183	1782	biological regulation	12	purple
GO:0009653	8.08843979581176e-07	2.04297746742495	43.0294997862334	74	553	anatomical structure morphogenesis	12	purple
GO:0050789	1.03573248537632e-06	1.71906976744186	112.359127832407	154	1444	regulation of biological process	12	purple
GO:0050794	1.24728382421248e-06	1.72632224436609	103.488670371954	144	1330	regulation of cellular process	12	purple
GO:0032501	3.89778030170138e-06	1.72926608275445	82.8687473279179	119	1065	multicellular organismal process	12	purple
GO:0048869	4.52315949039439e-06	1.95383887343333	42.5626336041043	71	547	cellular developmental process	12	purple
GO:0007275	5.39475861073967e-06	1.75969962453066	70.2633604104318	104	903	multicellular organismal development	12	purple
GO:0044707	5.78267248751956e-06	1.72710949922284	78.2000855066268	113	1005	single-multicellular organism process	12	purple
GO:0048513	5.98259941823424e-06	1.98925831202046	38.1274048738777	65	490	organ development	12	purple
GO:0032502	7.16158528473818e-06	1.71958866315525	77.6554082941428	112	998	developmental process	12	purple
GO:0044767	7.34924705137355e-06	1.72428215526177	75.943565626336	110	976	single-organism developmental process	12	purple
GO:0048856	8.36569985952646e-06	1.75540490017696	66.6062419837537	99	856	anatomical structure development	12	purple
GO:0009887	9.55161764210531e-06	2.30547713156409	21.2424112868747	42	273	organ morphogenesis	12	purple
GO:0007423	1.34795294528094e-05	2.67792985457656	13.2278751603249	30	170	sensory organ development	12	purple
GO:0001654	1.3764891234652e-05	2.98530746539596	10.037622915776	25	129	eye development	12	purple
GO:0048592	1.38274532044638e-05	3.36893718526372	7.62548097477555	21	98	eye morphogenesis	12	purple
GO:0007399	3.62101679170324e-05	1.97924070626728	30.7353569901667	53	395	nervous system development	12	purple
GO:0030154	3.66405996565307e-05	1.86413844996238	39.4501923899102	64	507	cell differentiation	12	purple
GO:0040011	3.9402160288023e-05	2.29373529775907	18.1299700726806	36	233	locomotion	12	purple
GO:0016477	4.88162956752579e-05	2.95207220950928	8.87045746045318	22	114	cell migration	12	purple
GO:0048699	5.29937369794666e-05	2.13586469820638	22.0205215904233	41	283	generation of neurons	12	purple
GO:0036211	5.31130638943161e-05	1.83637713437268	39.9170585720393	64	513	protein modification process	12	purple
GO:0006464	5.31130638943161e-05	1.83637713437268	39.9170585720393	64	513	cellular protein modification process	12	purple
GO:0022008	5.50726108477005e-05	2.11138056469773	22.7986318939718	42	293	neurogenesis	12	purple
GO:0048749	6.36106425080954e-05	3.07703488372093	7.78110303548525	20	100	compound eye development	12	purple
GO:0006928	6.45973991858574e-05	2.17959492394319	19.9974348011971	38	257	cellular component movement	12	purple
GO:0051128	6.4844207523182e-05	2.42631619877129	14.3172295852929	30	184	regulation of cellular component organization	12	purple
GO:0001745	6.76283035309544e-05	3.2976447243551	6.61393758016246	18	85	compound eye morphogenesis	12	purple
GO:0002376	7.87082305581452e-05	2.69775401069519	10.4266780675502	24	134	immune system process	12	purple
GO:0008360	9.65154604729817e-05	4.16764132553606	3.96836254809748	13	51	regulation of cell shape	12	purple
GO:0009987	0.000101350056358915	1.71404682274247	279.886276186404	308	3597	cellular process	12	purple
GO:0030182	0.000126512222764378	2.0986730088376	20.6199230440359	38	265	neuron differentiation	12	purple
GO:0046530	0.000141432790157296	3.52270222614062	5.21333903377512	15	67	photoreceptor cell differentiation	12	purple
GO:0043412	0.000173623553314496	1.74049196696015	42.3292005130398	65	544	macromolecule modification	12	purple
GO:0048870	0.000180468200259762	2.65634674922601	9.64856776400171	22	124	cell motility	12	purple
GO:0022604	0.000184259265275759	3.25977011494253	5.91363830696879	16	76	regulation of cell morphogenesis	12	purple
GO:0008347	0.000228286994603097	10.3120510774142	1.01154339461308	6	13	glial cell migration	12	purple
GO:0008286	0.000228286994603097	10.3120510774142	1.01154339461308	6	13	insulin receptor signaling pathway	12	purple
GO:0048569	0.000241756382011479	2.53052995391705	10.5044890979051	23	135	post-embryonic organ development	12	purple
GO:0022603	0.00030170094116896	2.86262292620674	7.39204788371099	18	95	regulation of anatomical structure morphogenesis	12	purple
GO:0044260	0.00035176290881474	1.46700451186817	128.466011115861	159	1651	cellular macromolecule metabolic process	12	purple
GO:0048563	0.000363363135236579	2.50519818063678	10.1154339461308	22	130	post-embryonic organ morphogenesis	12	purple
GO:0007560	0.000363363135236579	2.50519818063678	10.1154339461308	22	130	imaginal disc morphogenesis	12	purple
GO:0042692	0.000371761523699355	4.48524795982423	2.87900812312954	10	37	muscle cell differentiation	12	purple
GO:0048729	0.000379117006402335	2.22115384615385	14.3172295852929	28	184	tissue morphogenesis	12	purple
GO:0032989	0.000429496265161215	2.03385780885781	18.8302693458743	34	242	cellular component morphogenesis	12	purple
GO:0048707	0.000464350144217102	2.3984293453949	10.9713552800342	23	141	instar larval or pupal morphogenesis	12	purple
GO:0000902	0.000470998550797307	2.06927710843373	17.429670799487	32	224	cell morphogenesis	12	purple
GO:0048468	0.000486690408059889	1.83477181126084	27.4672937152629	45	353	cell development	12	purple
GO:0048534	0.000487206179300846	3.64261363636364	4.04617357845233	12	52	hematopoietic or lymphoid organ development	12	purple
GO:0009886	0.000515181280386396	2.37770768131299	11.0491663103891	23	142	post-embryonic morphogenesis	12	purple
GO:0002520	0.000549904679617523	3.36249014972419	4.66866182129115	13	60	immune system development	12	purple
GO:0050793	0.00055410441138065	2.09936060083223	16.1068832834545	30	207	regulation of developmental process	12	purple
GO:0007552	0.000570809586354737	2.35733137829912	11.1269773407439	23	143	metamorphosis	12	purple
GO:0016310	0.00061384942978428	1.87877100157802	23.8101752885849	40	306	phosphorylation	12	purple
GO:0007391	0.000650673848947443	3.29166666666667	4.746472851646	13	61	dorsal closure	12	purple
GO:0002009	0.000679324219520305	2.19599578503688	13.3834972210346	26	172	morphogenesis of an epithelium	12	purple
GO:0048645	0.000727035841185815	6.02240896358543	1.6340316374519	7	21	organ formation	12	purple
GO:0030097	0.000732568346041149	4.03389830508475	3.1124412141941	10	40	hemopoiesis	12	purple
GO:0048598	0.000766971446501175	2.25397395599461	12.0607097050021	24	155	embryonic morphogenesis	12	purple
GO:0051674	0.000785807534022038	2.52734719596723	8.63702436938863	19	111	localization of cell	12	purple
GO:0007254	0.000862001537558302	4.34940845070423	2.64557503206498	9	34	JNK cascade	12	purple
GO:0051239	0.000868375965043295	2.05970149253731	15.7956391620351	29	203	regulation of multicellular organismal process	12	purple
GO:0007444	0.000967505515776019	2.13538461538462	13.694741342454	26	176	imaginal disc development	12	purple
GO:0008594	0.00104464336697458	15.9666666666667	0.544677212483967	4	7	photoreceptor cell morphogenesis	12	purple
GO:0001751	0.00106648833515848	3.50648576114507	3.81274048738777	11	49	compound eye photoreceptor cell differentiation	12	purple
GO:0031098	0.00108230181806753	4.18114842903575	2.72338606241984	9	35	stress-activated protein kinase signaling cascade	12	purple
GO:0051403	0.00108230181806753	4.18114842903575	2.72338606241984	9	35	stress-activated MAPK cascade	12	purple
GO:0002165	0.0011103716631456	2.18509803921569	12.3719538264215	24	159	instar larval or pupal development	12	purple
GO:0001754	0.00117041487144714	3.23409090909091	4.43522873022659	12	57	eye photoreceptor cell differentiation	12	purple
GO:0009790	0.00119239787691834	1.83250107005279	23.0320649850363	38	296	embryo development	12	purple
GO:0016043	0.00121320923090271	1.50380771061399	66.3728088926892	89	853	cellular component organization	12	purple
GO:0071840	0.0012136210606533	1.49851380042463	68.1624625908508	91	876	cellular component organization or biogenesis	12	purple
GO:0032869	0.0012587420413887	6.55611985779584	1.32278751603249	6	17	cellular response to insulin stimulus	12	purple
GO:1901653	0.0012587420413887	6.55611985779584	1.32278751603249	6	17	cellular response to peptide	12	purple
GO:0071375	0.0012587420413887	6.55611985779584	1.32278751603249	6	17	cellular response to peptide hormone stimulus	12	purple
GO:0050896	0.00136762621861218	1.45216396386375	85.6699444206926	110	1101	response to stimulus	12	purple
GO:0051704	0.00155086439487851	1.81621157728058	22.5651988029072	37	290	multi-organism process	12	purple
GO:0006955	0.00160752291590294	3.09501934235977	4.5908507909363	12	59	immune response	12	purple
GO:0048519	0.00161436221888125	1.74521739130435	26.6113723813596	42	342	negative regulation of biological process	12	purple
GO:0003006	0.00162283564354988	2.15372389245819	11.9828986746473	23	154	developmental process involved in reproduction	12	purple
GO:0001736	0.00165920287701988	3.88068410462777	2.87900812312954	9	37	establishment of planar polarity	12	purple
GO:0007164	0.00165920287701988	3.88068410462777	2.87900812312954	9	37	establishment of tissue polarity	12	purple
GO:0001746	0.00176183335781121	35.8421052631579	0.31124412141941	3	4	Bolwig's organ morphogenesis	12	purple
GO:0055034	0.00176183335781121	35.8421052631579	0.31124412141941	3	4	Bolwig's organ development	12	purple
GO:0042332	0.00176183335781121	35.8421052631579	0.31124412141941	3	4	gravitaxis	12	purple
GO:0032868	0.00176599024762351	6.00837988826816	1.40059854638734	6	18	response to insulin	12	purple
GO:0071417	0.00176599024762351	6.00837988826816	1.40059854638734	6	18	cellular response to organonitrogen compound	12	purple
GO:0051246	0.00177196349606594	2.13689682751266	12.0607097050021	23	155	regulation of protein metabolic process	12	purple
GO:0060429	0.00178886694675616	2.0020020735762	15.0175288584865	27	193	epithelium development	12	purple
GO:0000165	0.00178923030192079	3.24763352449389	4.04617357845233	11	52	MAPK cascade	12	purple
GO:0023014	0.00178923030192079	3.24763352449389	4.04617357845233	11	52	signal transduction by phosphorylation	12	purple
GO:0060284	0.00185337840230236	2.74322580645161	5.91363830696879	14	76	regulation of cell development	12	purple
GO:0030707	0.0018719274749743	3.02982954545455	4.66866182129115	12	60	ovarian follicle cell development	12	purple
GO:0051146	0.00199447334935179	4.19247679531021	2.41214194100043	8	31	striated muscle cell differentiation	12	purple
GO:0031323	0.00208769282564847	1.56114911080711	44.5857203933305	63	573	regulation of cellular metabolic process	12	purple
GO:0042052	0.00211536781487101	7.49651810584958	1.01154339461308	5	13	rhabdomere development	12	purple
GO:0016476	0.00211536781487101	7.49651810584958	1.01154339461308	5	13	regulation of embryonic cell shape	12	purple
GO:0048667	0.0021673199144513	2.13812308549151	11.5160324925182	22	148	cell morphogenesis involved in neuron differentiation	12	purple
GO:0055001	0.00228948226415191	4.6797385620915	1.94527575887131	7	25	muscle cell development	12	purple
GO:0055002	0.00228948226415191	4.6797385620915	1.94527575887131	7	25	striated muscle cell development	12	purple
GO:1901699	0.00228948226415191	4.6797385620915	1.94527575887131	7	25	cellular response to nitrogen compound	12	purple
GO:0009792	0.00249137501697016	2.07206313610488	12.3719538264215	23	159	embryo development ending in birth or egg hatching	12	purple
GO:0006468	0.00251372568628851	1.85643896323508	18.4412141941	31	237	protein phosphorylation	12	purple
GO:0001700	0.00270851955427579	2.61476923076923	6.14707139803335	14	79	embryonic development via the syncytial blastoderm	12	purple
GO:0009888	0.0028072818564228	1.78834300451322	20.9311671654553	34	269	tissue development	12	purple
GO:0016331	0.00287153514218244	2.49695804058563	6.84737067122702	15	88	morphogenesis of embryonic epithelium	12	purple
GO:0019222	0.00299183120842166	1.50282485875706	51.3552800342027	70	660	regulation of metabolic process	12	purple
GO:0048666	0.00319085004175228	1.93426573426573	14.8619067977768	26	191	neuron development	12	purple
GO:0043434	0.0032267144638761	5.14764565043895	1.55622060709705	6	20	response to peptide hormone	12	purple
GO:0010160	0.0032267144638761	5.14764565043895	1.55622060709705	6	20	formation of organ boundary	12	purple
GO:1901652	0.0032267144638761	5.14764565043895	1.55622060709705	6	20	response to peptide	12	purple
GO:0045995	0.0032267144638761	5.14764565043895	1.55622060709705	6	20	regulation of embryonic development	12	purple
GO:0007389	0.00323660393545624	1.90627238309629	15.6400171013254	27	201	pattern specification process	12	purple
GO:0044267	0.00325157246874059	1.44558113366778	66.6840530141086	87	857	cellular protein metabolic process	12	purple
GO:0014902	0.00331552036477547	9.57555555555555	0.700299273193672	4	9	myotube differentiation	12	purple
GO:0003008	0.00343472492789105	2.086112493778	11.2047883710988	21	144	system process	12	purple
GO:0042067	0.00369338334508638	4.20980392156863	2.10089781958102	7	27	establishment of ommatidial planar polarity	12	purple
GO:0006541	0.00415049708889503	17.9168975069252	0.389055151774263	3	5	glutamine metabolic process	12	purple
GO:0030713	0.00415049708889503	17.9168975069252	0.389055151774263	3	5	ovarian follicle cell stalk formation	12	purple
GO:0009629	0.00415049708889503	17.9168975069252	0.389055151774263	3	5	response to gravity	12	purple
GO:0018205	0.00422658591295221	4.80335195530726	1.6340316374519	6	21	peptidyl-lysine modification	12	purple
GO:0032268	0.00449042130177135	2.22357534628614	8.55921333903378	17	110	regulation of cellular protein metabolic process	12	purple
GO:0007422	0.00452202987662194	3.56803995006242	2.72338606241984	8	35	peripheral nervous system development	12	purple
GO:0003002	0.00468811299167753	1.95320136852395	12.9944420692604	23	167	regionalization	12	purple
GO:0000904	0.00468811299167753	1.95320136852395	12.9944420692604	23	167	cell morphogenesis involved in differentiation	12	purple
GO:0051716	0.00495268727000317	1.4398570861453	59.5254382214622	78	765	cellular response to stimulus	12	purple
GO:0018193	0.00511381960198082	2.94405401681135	3.96836254809748	10	51	peptidyl-amino acid modification	12	purple
GO:0035099	0.005189874097081	7.97777777777778	0.778110303548525	4	10	hemocyte migration	12	purple
GO:0009791	0.00519225478517557	1.87804260093744	14.6284737067123	25	188	post-embryonic development	12	purple
GO:0060255	0.00525930491349397	1.49495926155116	44.5857203933305	61	573	regulation of macromolecule metabolic process	12	purple
GO:2000026	0.00539618316892831	2.03197674418605	10.8935442496793	20	140	regulation of multicellular organismal development	12	purple
GO:0007431	0.00542945513658458	3.43980738362761	2.80119709277469	8	36	salivary gland development	12	purple
GO:0042461	0.00542945513658458	3.43980738362761	2.80119709277469	8	36	photoreceptor cell development	12	purple
GO:0048859	0.00543803366031026	4.50209497206704	1.71184266780676	6	22	formation of anatomical boundary	12	purple
GO:0050877	0.00547896683556357	2.23384859294491	8.01453612654981	16	103	neurological system process	12	purple
GO:0048646	0.00551705444847904	1.89404174573055	13.9281744335186	24	179	anatomical structure formation involved in morphogenesis	12	purple
GO:0007297	0.00567060940280044	3.825311942959	2.25651988029072	7	29	ovarian follicle cell migration	12	purple
GO:0080090	0.00568788373816867	1.48835895262678	44.7413424540402	61	575	regulation of primary metabolic process	12	purple
GO:0048523	0.00569358840844584	1.67027324408582	23.4989311671655	36	302	negative regulation of cellular process	12	purple
GO:0048477	0.00584998533151934	2.01470305592927	10.9713552800342	20	141	oogenesis	12	purple
GO:0035162	0.00590750603796835	5.44821473790833	1.24497648567764	5	16	embryonic hemopoiesis	12	purple
GO:0048536	0.00603921403010722	Inf	0.155622060709705	2	2	spleen development	12	purple
GO:0019731	0.00603921403010722	Inf	0.155622060709705	2	2	antibacterial humoral response	12	purple
GO:0019732	0.00603921403010722	Inf	0.155622060709705	2	2	antifungal humoral response	12	purple
GO:0009642	0.00603921403010722	Inf	0.155622060709705	2	2	response to light intensity	12	purple
GO:0035220	0.00609190602887105	2.04742849814031	10.2710560068405	19	132	wing disc development	12	purple
GO:0007165	0.00615367813680674	1.45813381799541	50.1881145788799	67	645	signal transduction	12	purple
GO:0030030	0.00629455163184223	1.7793609671848	17.1962377084224	28	221	cell projection organization	12	purple
GO:0035114	0.00648944964824681	2.12986125553344	8.87045746045318	17	114	imaginal disc-derived appendage morphogenesis	12	purple
GO:0044702	0.00669693526279009	1.76975945017182	17.2740487387773	28	222	single organism reproductive process	12	purple
GO:0035107	0.00686799004219932	2.06521976224234	9.64856776400171	18	124	appendage morphogenesis	12	purple
GO:0032870	0.00688524476298847	4.23627998685508	1.78965369816161	6	23	cellular response to hormone stimulus	12	purple
GO:0042325	0.00727511066621549	2.38383838383838	6.14707139803335	13	79	regulation of phosphorylation	12	purple
GO:0035272	0.00765388034536464	3.20898876404494	2.95681915348439	8	38	exocrine system development	12	purple
GO:0061564	0.00773062639166654	2.08584403108899	9.02607952116289	17	116	axon development	12	purple
GO:0048737	0.00773062639166654	2.08584403108899	9.02607952116289	17	116	imaginal disc-derived appendage development	12	purple
GO:0007264	0.00773062639166654	2.08584403108899	9.02607952116289	17	116	small GTPase mediated signal transduction	12	purple
GO:0035019	0.00782405369365763	11.9418282548476	0.466866182129115	3	6	somatic stem cell maintenance	12	purple
GO:0048747	0.00782405369365763	11.9418282548476	0.466866182129115	3	6	muscle fiber development	12	purple
GO:0016573	0.00784449103654319	4.99303621169916	1.32278751603249	5	17	histone acetylation	12	purple
GO:0018393	0.00784449103654319	4.99303621169916	1.32278751603249	5	17	internal peptidyl-lysine acetylation	12	purple
GO:0018394	0.00784449103654319	4.99303621169916	1.32278751603249	5	17	peptidyl-lysine acetylation	12	purple
GO:0019827	0.00784449103654319	4.99303621169916	1.32278751603249	5	17	stem cell maintenance	12	purple
GO:0006475	0.00784449103654319	4.99303621169916	1.32278751603249	5	17	internal protein amino acid acetylation	12	purple
GO:0007292	0.00798973936609991	1.94837209302326	11.2825994014536	20	145	female gamete generation	12	purple
GO:0000003	0.00807473054175848	1.66299341290674	21.5536554082941	33	277	reproduction	12	purple
GO:0045595	0.00810737174412502	2.02601156069364	9.80418982471141	18	126	regulation of cell differentiation	12	purple
GO:0042063	0.00834886257796525	3.50490196078431	2.41214194100043	7	31	gliogenesis	12	purple
GO:0046328	0.00859224226255634	4	1.86746472851646	6	24	regulation of JNK cascade	12	purple
GO:0032872	0.00859224226255634	4	1.86746472851646	6	24	regulation of stress-activated MAPK cascade	12	purple
GO:0070302	0.00859224226255634	4	1.86746472851646	6	24	regulation of stress-activated protein kinase signaling cascade	12	purple
GO:0007298	0.00859224226255634	4	1.86746472851646	6	24	border follicle cell migration	12	purple
GO:0035120	0.00868510908514362	2.10994502748626	8.40359127832407	16	108	post-embryonic appendage morphogenesis	12	purple
GO:0001738	0.00909796065412817	2.85277983691623	3.65711842667807	9	47	morphogenesis of a polarized epithelium	12	purple
GO:0009605	0.00931602815335644	1.7564810879728	16.1068832834545	26	207	response to external stimulus	12	purple
GO:0051247	0.00948618503236833	2.50526484579614	4.97990594271056	11	64	positive regulation of protein metabolic process	12	purple
GO:0006473	0.0101823759553584	4.60788515106064	1.40059854638734	5	18	protein acetylation	12	purple
GO:0048736	0.0102988098228787	1.96984846117794	10.037622915776	18	129	appendage development	12	purple
GO:0043170	0.0104474183484258	1.29717909403516	145.662248824284	167	1872	macromolecule metabolic process	12	purple
GO:0035556	0.0105148498444916	1.73644388398487	16.2625053441642	26	209	intracellular signal transduction	12	purple
GO:0022414	0.0105560849038527	1.6530095312704	20.3086789226165	31	261	reproductive process	12	purple
GO:0016070	0.01079164433743	1.4127810087406	51.4330910645575	67	661	RNA metabolic process	12	purple
GO:0008593	0.0107967460328984	5.98055555555556	0.93373236425823	4	12	regulation of Notch signaling pathway	12	purple
GO:0010468	0.0108306205402001	1.48921568627451	35.5596408721676	49	457	regulation of gene expression	12	purple
GO:0007169	0.0113890422400248	2.56461113114557	4.43522873022659	10	57	transmembrane receptor protein tyrosine kinase signaling pathway	12	purple
GO:0055123	0.0118576549997307	3.23378582202112	2.56776400171013	7	33	digestive system development	12	purple
GO:0097485	0.0119325352240304	2.14430379746835	7.23642582300128	14	93	neuron projection guidance	12	purple
GO:0007411	0.0119325352240304	2.14430379746835	7.23642582300128	14	93	axon guidance	12	purple
GO:0007600	0.0119538726977928	2.70887323943662	3.81274048738777	9	49	sensory perception	12	purple
GO:0007276	0.0120295260309397	1.7338763743631	15.6400171013254	25	201	gamete generation	12	purple
GO:0022412	0.012224272286899	1.89232596816346	10.9713552800342	19	141	cellular process involved in reproduction in multicellular organism	12	purple
GO:0031325	0.0123515487743735	1.85647079708859	11.7494655835827	20	151	positive regulation of cellular metabolic process	12	purple
GO:0031175	0.0123836876239868	1.79814749401468	13.3056861906798	22	171	neuron projection development	12	purple
GO:0007409	0.0126355794448477	1.96385343762865	9.492945703292	17	122	axonogenesis	12	purple
GO:0042330	0.0126355794448477	1.96385343762865	9.492945703292	17	122	taxis	12	purple
GO:0019953	0.0127110085639742	1.67032520325203	18.1299700726806	28	233	sexual reproduction	12	purple
GO:0048583	0.0127679967955106	1.72366381680916	15.7178281316802	25	202	regulation of response to stimulus	12	purple
GO:0048568	0.0128404638658256	2.51059322033898	4.51303976058144	10	58	embryonic organ development	12	purple
GO:0060548	0.0128790986210354	3.59832402234637	2.02308678922617	6	26	negative regulation of cell death	12	purple
GO:1901701	0.0128790986210354	3.59832402234637	2.02308678922617	6	26	cellular response to oxygen-containing compound	12	purple
GO:0006949	0.0129086114386699	8.95429362880886	0.544677212483967	3	7	syncytium formation	12	purple
GO:0000768	0.0129086114386699	8.95429362880886	0.544677212483967	3	7	syncytium formation by plasma membrane fusion	12	purple
GO:0007520	0.0129086114386699	8.95429362880886	0.544677212483967	3	7	myoblast fusion	12	purple
GO:0044419	0.0129566612809998	4.27775567051333	1.4784095767422	5	19	interspecies interaction between organisms	12	purple
GO:0043543	0.0129566612809998	4.27775567051333	1.4784095767422	5	19	protein acylation	12	purple
GO:0065008	0.0129942390538783	1.40694835680751	49.1765711842668	64	632	regulation of biological quality	12	purple
GO:0033554	0.013256255429636	1.81198436821537	12.6053869174861	21	162	cellular response to stress	12	purple
GO:0044700	0.0135686367461908	1.37248176581557	59.2141941000428	75	761	single organism signaling	12	purple
GO:0016049	0.0136102983047578	2.64218481621436	3.89055151774263	9	50	cell growth	12	purple
GO:0006796	0.0144936375972772	1.42270711510537	43.1851218469431	57	555	phosphate-containing compound metabolic process	12	purple
GO:0051098	0.0146551363520216	5.31481481481481	1.01154339461308	4	13	regulation of binding	12	purple
GO:0007050	0.0146551363520216	5.31481481481481	1.01154339461308	4	13	cell cycle arrest	12	purple
GO:0045214	0.0146551363520216	5.31481481481481	1.01154339461308	4	13	sarcomere organization	12	purple
GO:0048706	0.0146551363520216	5.31481481481481	1.01154339461308	4	13	embryonic skeletal system development	12	purple
GO:0048732	0.014793997257406	2.32727001640078	5.29115006412997	11	68	gland development	12	purple
GO:0009893	0.0151519424047387	1.81360638667129	11.9828986746473	20	154	positive regulation of metabolic process	12	purple
GO:0044703	0.015766574910881	1.63676236044657	18.4412141941	28	237	multi-organism reproductive process	12	purple
GO:0007154	0.0159073189335372	1.35778727445394	60.5369816160752	76	778	cell communication	12	purple
GO:0031326	0.0159310614969178	1.47878065395095	31.9803334758444	44	411	regulation of cellular biosynthetic process	12	purple
GO:0048610	0.0159570558657146	1.74945533769063	13.6169303120992	22	175	cellular process involved in reproduction	12	purple
GO:0007163	0.0160374500950396	2.12212212212212	6.76955964087217	13	87	establishment or maintenance of cell polarity	12	purple
GO:0035316	0.0161999768867077	3.991643454039	1.55622060709705	5	20	non-sensory hair organization	12	purple
GO:1901698	0.0163236418710379	3.00140056022409	2.72338606241984	7	35	response to nitrogen compound	12	purple
GO:0007424	0.0163439191949036	2.19421487603306	6.0692603676785	12	78	open tracheal system development	12	purple
GO:0006950	0.0167084287481043	1.58725671277973	21.0089781958102	31	270	response to stress	12	purple
GO:0050832	0.0171825713123495	23.828729281768	0.233433091064558	2	3	defense response to fungus	12	purple
GO:0048008	0.0171825713123495	23.828729281768	0.233433091064558	2	3	platelet-derived growth factor receptor signaling pathway	12	purple
GO:0045445	0.0171825713123495	23.828729281768	0.233433091064558	2	3	myoblast differentiation	12	purple
GO:0051153	0.0171825713123495	23.828729281768	0.233433091064558	2	3	regulation of striated muscle cell differentiation	12	purple
GO:0035112	0.0171825713123495	23.828729281768	0.233433091064558	2	3	genitalia morphogenesis	12	purple
GO:0009889	0.0172426957613349	1.47002032520325	32.1359555365541	44	413	regulation of biosynthetic process	12	purple
GO:0019220	0.0176201514602908	1.97240563099539	8.32578024796922	15	107	regulation of phosphate metabolic process	12	purple
GO:0006793	0.0178126496867846	1.40355979525361	43.6519880290722	57	561	phosphorus metabolic process	12	purple
GO:0007167	0.0179681834089969	2.1609565807327	6.14707139803335	12	79	enzyme linked receptor protein signaling pathway	12	purple
GO:0032270	0.0180328804918396	2.36124958457959	4.746472851646	10	61	positive regulation of cellular protein metabolic process	12	purple
GO:0042221	0.0184061763456858	1.57331190111273	21.1646002565199	31	272	response to chemical	12	purple
GO:0048812	0.0184307010865618	1.77261924970294	12.2163317657118	20	157	neuron projection morphogenesis	12	purple
GO:0010243	0.018476627435719	3.26968004062976	2.17870884993587	6	28	response to organonitrogen compound	12	purple
GO:0051174	0.0190612873272499	1.95073481837508	8.40359127832407	15	108	regulation of phosphorus metabolic process	12	purple
GO:0030098	0.0192839640949956	4.78222222222222	1.08935442496793	4	14	lymphocyte differentiation	12	purple
GO:0016055	0.0196001048867523	2.46030729833547	4.12398460880718	9	53	Wnt signaling pathway	12	purple
GO:0019730	0.0199416615660063	3.74129526462396	1.6340316374519	5	21	antimicrobial humoral response	12	purple
GO:1901700	0.020066565796845	2.31529769665363	4.82428388200085	10	62	response to oxygen-containing compound	12	purple
GO:0009966	0.0206370706976427	1.72338665195808	13.1500641299701	21	169	regulation of signal transduction	12	purple
GO:0071495	0.0209669495701802	2.59763133920437	3.50149636596836	8	45	cellular response to endogenous stimulus	12	purple
GO:0006959	0.0218173277921325	3.12679135292689	2.25651988029072	6	29	humoral immune response	12	purple
GO:0045596	0.0222631467610706	2.2710798422343	4.90209491235571	10	63	negative regulation of cell differentiation	12	purple
GO:0032504	0.0232740136243773	1.58960134176235	18.2077811030355	27	234	multicellular organism reproduction	12	purple
GO:0044237	0.0235293258098907	1.25038687712782	183.322787516032	202	2356	cellular metabolic process	12	purple
GO:0010604	0.0241538556184016	1.77259269702524	10.9713552800342	18	141	positive regulation of macromolecule metabolic process	12	purple
GO:0090304	0.0243198969821946	1.30970149253731	69.096194955109	84	888	nucleic acid metabolic process	12	purple
GO:0048609	0.0244554576175583	1.58157384158868	18.2855921333903	27	235	multicellular organismal reproductive process	12	purple
GO:0008258	0.0247204728366266	4.34646464646465	1.16716545532279	4	15	head involution	12	purple
GO:0002521	0.0247204728366266	4.34646464646465	1.16716545532279	4	15	leukocyte differentiation	12	purple
GO:0043408	0.0250753694644031	2.70904490828589	2.95681915348439	7	38	regulation of MAPK cascade	12	purple
GO:0048522	0.0250776687550303	1.55137470542027	19.9974348011971	29	257	positive regulation of cellular process	12	purple
GO:0080135	0.0255431596166444	2.99581005586592	2.33433091064557	6	30	regulation of cellular response to stress	12	purple
GO:0048565	0.0255431596166444	2.99581005586592	2.33433091064557	6	30	digestive tract development	12	purple
GO:0042462	0.0255431596166444	2.99581005586592	2.33433091064557	6	30	eye photoreceptor cell development	12	purple
GO:0023052	0.0257775646826392	1.31944444444444	61.8597691321077	76	795	signaling	12	purple
GO:0030029	0.0259198095542767	1.82520060724355	9.492945703292	16	122	actin filament-based process	12	purple
GO:0031399	0.0265823302672458	2.10265749359234	5.75801624625908	11	74	regulation of protein modification process	12	purple
GO:0016358	0.0272989472548816	2.30164818699431	4.35741769987174	9	56	dendrite development	12	purple
GO:0006935	0.0273158220738982	1.89887640449438	8.01453612654981	14	103	chemotaxis	12	purple
GO:0007476	0.0273158220738982	1.89887640449438	8.01453612654981	14	103	imaginal disc-derived wing morphogenesis	12	purple
GO:0044764	0.0275575081103006	5.96675900277008	0.700299273193672	3	9	multi-organism cellular process	12	purple
GO:0016032	0.0275575081103006	5.96675900277008	0.700299273193672	3	9	viral process	12	purple
GO:0007049	0.0278191559293834	1.51332132132132	21.8648995297136	31	281	cell cycle	12	purple
GO:0001558	0.029019153845129	3.32404828226555	1.78965369816161	5	23	regulation of cell growth	12	purple
GO:0072001	0.029019153845129	3.32404828226555	1.78965369816161	5	23	renal system development	12	purple
GO:0035315	0.029019153845129	3.32404828226555	1.78965369816161	5	23	hair cell differentiation	12	purple
GO:0048858	0.0292140149251697	1.6538563477339	13.6169303120992	21	175	cell projection morphogenesis	12	purple
GO:0007472	0.0294191955350137	1.87733333333333	8.09234715690466	14	104	wing disc morphogenesis	12	purple
GO:0007435	0.0296697909059274	2.87530726256983	2.41214194100043	6	31	salivary gland morphogenesis	12	purple
GO:0050808	0.0299756199759559	2.40112359550562	3.73492945703292	8	48	synapse organization	12	purple
GO:0090132	0.0299756199759559	2.40112359550562	3.73492945703292	8	48	epithelium migration	12	purple
GO:0032990	0.0308733072155195	1.64279131007242	13.694741342454	21	176	cell part morphogenesis	12	purple
GO:0061525	0.0309914617695126	3.98333333333333	1.24497648567764	4	16	hindgut development	12	purple
GO:0007480	0.0309914617695126	3.98333333333333	1.24497648567764	4	16	imaginal disc-derived leg morphogenesis	12	purple
GO:0007442	0.0309914617695126	3.98333333333333	1.24497648567764	4	16	hindgut morphogenesis	12	purple
GO:0007519	0.0309914617695126	3.98333333333333	1.24497648567764	4	16	skeletal muscle tissue development	12	purple
GO:0045165	0.0316391092085103	1.85626373626374	8.17015818725951	14	105	cell fate commitment	12	purple
GO:0031327	0.0317118835233919	2.03700152538679	5.91363830696879	11	76	negative regulation of cellular biosynthetic process	12	purple
GO:0032774	0.0319472867420383	1.41119714115545	31.669089354425	42	407	RNA biosynthetic process	12	purple
GO:0006351	0.0319472867420383	1.41119714115545	31.669089354425	42	407	transcription, DNA-templated	12	purple
GO:0048863	0.0324305009284877	2.54367201426025	3.1124412141941	7	40	stem cell differentiation	12	purple
GO:0032350	0.0326033092668878	11.9116022099448	0.31124412141941	2	4	regulation of hormone metabolic process	12	purple
GO:0060675	0.0326033092668878	11.9116022099448	0.31124412141941	2	4	ureteric bud morphogenesis	12	purple
GO:0001658	0.0326033092668878	11.9116022099448	0.31124412141941	2	4	branching involved in ureteric bud morphogenesis	12	purple
GO:0030278	0.0326033092668878	11.9116022099448	0.31124412141941	2	4	regulation of ossification	12	purple
GO:1902106	0.0326033092668878	11.9116022099448	0.31124412141941	2	4	negative regulation of leukocyte differentiation	12	purple
GO:0050829	0.0326033092668878	11.9116022099448	0.31124412141941	2	4	defense response to Gram-negative bacterium	12	purple
GO:0006930	0.0326033092668878	11.9116022099448	0.31124412141941	2	4	substrate-dependent cell migration, cell extension	12	purple
GO:0046671	0.0326033092668878	11.9116022099448	0.31124412141941	2	4	negative regulation of retinal cell programmed cell death	12	purple
GO:0046673	0.0326033092668878	11.9116022099448	0.31124412141941	2	4	negative regulation of compound eye retinal cell programmed cell death	12	purple
GO:0045747	0.0326033092668878	11.9116022099448	0.31124412141941	2	4	positive regulation of Notch signaling pathway	12	purple
GO:0043968	0.0326033092668878	11.9116022099448	0.31124412141941	2	4	histone H2A acetylation	12	purple
GO:0009620	0.0326033092668878	11.9116022099448	0.31124412141941	2	4	response to fungus	12	purple
GO:0006376	0.0326033092668878	11.9116022099448	0.31124412141941	2	4	mRNA splice site selection	12	purple
GO:0010556	0.0334850020188181	1.41126030542317	30.8909790508764	41	397	regulation of macromolecule biosynthetic process	12	purple
GO:0010631	0.033492058469256	2.34201151000274	3.81274048738777	8	49	epithelial cell migration	12	purple
GO:0042051	0.0343946568931744	3.14836534232517	1.86746472851646	5	24	compound eye photoreceptor development	12	purple
GO:0009890	0.0345250127804189	2.0056657223796	5.99144933732364	11	77	negative regulation of biosynthetic process	12	purple
GO:0051960	0.0345250127804189	2.0056657223796	5.99144933732364	11	77	regulation of nervous system development	12	purple
GO:0051301	0.0353576714608088	1.63654934003771	13.0722530996152	20	168	cell division	12	purple
GO:0019538	0.0358477542742834	1.26776256881176	78.7447627191107	93	1012	protein metabolic process	12	purple
GO:0010941	0.0359134339724737	2.07286187414767	5.29115006412997	10	68	regulation of cell death	12	purple
GO:0060582	0.037143636973109	5.11317768104472	0.778110303548525	3	10	cell fate determination involved in pattern specification	12	purple
GO:0008052	0.037143636973109	5.11317768104472	0.778110303548525	3	10	sensory organ boundary specification	12	purple
GO:0046664	0.037143636973109	5.11317768104472	0.778110303548525	3	10	dorsal closure, amnioserosa morphology change	12	purple
GO:0045746	0.037143636973109	5.11317768104472	0.778110303548525	3	10	negative regulation of Notch signaling pathway	12	purple
GO:0007432	0.037143636973109	5.11317768104472	0.778110303548525	3	10	salivary gland boundary specification	12	purple
GO:0016360	0.037143636973109	5.11317768104472	0.778110303548525	3	10	sensory organ precursor cell fate determination	12	purple
GO:0051093	0.0375099684437126	1.9752653164771	6.0692603676785	11	78	negative regulation of developmental process	12	purple
GO:0030239	0.0381136066104263	3.67606837606838	1.32278751603249	4	17	myofibril assembly	12	purple
GO:0050776	0.0381136066104263	3.67606837606838	1.32278751603249	4	17	regulation of immune response	12	purple
GO:0007478	0.0381136066104263	3.67606837606838	1.32278751603249	4	17	leg disc morphogenesis	12	purple
GO:0051252	0.0381159242206408	1.4070796460177	29.4125694741342	39	378	regulation of RNA metabolic process	12	purple
GO:0061061	0.0384689644341236	1.90101674641148	6.84737067122702	12	88	muscle structure development	12	purple
GO:0030036	0.0388307997383641	1.75717027846552	9.18170158187259	15	118	actin cytoskeleton organization	12	purple
GO:0009725	0.0391783574422155	2.6610800744879	2.56776400171013	6	33	response to hormone	12	purple
GO:2000113	0.0392181261545145	2.03724983242363	5.36896109448482	10	69	negative regulation of cellular macromolecule biosynthetic process	12	purple
GO:0044763	0.0399539528144675	1.21800493749225	175.463873450192	192	2255	single-organism cellular process	12	purple
GO:0001752	0.0403476742351654	2.99025069637883	1.94527575887131	5	25	compound eye photoreceptor fate commitment	12	purple
GO:0043069	0.0403476742351654	2.99025069637883	1.94527575887131	5	25	negative regulation of programmed cell death	12	purple
GO:0048864	0.0403476742351654	2.99025069637883	1.94527575887131	5	25	stem cell development	12	purple
GO:0043933	0.0403511633528712	1.52495515927721	17.429670799487	25	224	macromolecular complex subunit organization	12	purple
GO:0080134	0.0411032005994241	2.39719887955182	3.26806327490381	7	42	regulation of response to stress	12	purple
GO:0002682	0.0411032005994241	2.39719887955182	3.26806327490381	7	42	regulation of immune system process	12	purple
GO:0001932	0.0413438209807658	2.23203553697413	3.96836254809748	8	51	regulation of protein phosphorylation	12	purple
GO:0048584	0.0413438209807658	2.23203553697413	3.96836254809748	8	51	positive regulation of response to stimulus	12	purple
GO:0044087	0.0413438209807658	2.23203553697413	3.96836254809748	8	51	regulation of cellular component biogenesis	12	purple
GO:0060541	0.0414807084840932	1.87588547815821	6.92518170158187	12	89	respiratory system development	12	purple
GO:2000112	0.0418317910528987	1.38959034792368	30.5019238991022	40	392	regulation of cellular macromolecule biosynthetic process	12	purple
GO:0007417	0.0441059331519681	1.7228817028244	9.3373236425823	15	120	central nervous system development	12	purple
GO:0070925	0.0456927522208067	2.18079673135853	4.04617357845233	8	52	organelle assembly	12	purple
GO:0006470	0.0456927522208067	2.18079673135853	4.04617357845233	8	52	protein dephosphorylation	12	purple
GO:0050803	0.0459549691970944	2.33006535947712	3.34587430525866	7	43	regulation of synapse structure and activity	12	purple
GO:0009967	0.0459549691970944	2.33006535947712	3.34587430525866	7	43	positive regulation of signal transduction	12	purple
GO:0010558	0.0464434771052554	1.96952857275169	5.52458315519453	10	71	negative regulation of macromolecule biosynthetic process	12	purple
GO:0001655	0.0468878112861487	2.84719458814166	2.02308678922617	5	26	urogenital system development	12	purple
GO:0031032	0.0468878112861487	2.84719458814166	2.02308678922617	5	26	actomyosin structure organization	12	purple
GO:0050807	0.0468878112861487	2.84719458814166	2.02308678922617	5	26	regulation of synapse organization	12	purple
GO:0009913	0.0468878112861487	2.84719458814166	2.02308678922617	5	26	epidermal cell differentiation	12	purple
GO:0042445	0.0472036825707653	1.4267178604528	23.73236425823	32	305	hormone metabolic process	12	purple
GO:0023051	0.0473803370447598	1.53976946219112	15.1731509191962	22	195	regulation of signaling	12	purple
GO:1902531	0.0479645434579751	1.77861952861953	7.8589140658401	13	101	regulation of intracellular signal transduction	12	purple
GO:0030261	0.0481996183923773	4.47299168975069	0.855921333903378	3	11	chromosome condensation	12	purple
GO:0048619	0.0481996183923773	4.47299168975069	0.855921333903378	3	11	embryonic hindgut morphogenesis	12	purple
GO:0042742	0.0481996183923773	4.47299168975069	0.855921333903378	3	11	defense response to bacterium	12	purple
GO:0010623	0.0481996183923773	4.47299168975069	0.855921333903378	3	11	developmental programmed cell death	12	purple
GO:0016318	0.0481996183923773	4.47299168975069	0.855921333903378	3	11	ommatidial rotation	12	purple
GO:0071310	0.0486283058837896	2.03821419080521	4.82428388200085	9	62	cellular response to organic substance	12	purple
GO:0006996	0.0490839354602527	1.33402221648153	38.0495938435229	48	489	organelle organization	12	purple
GO:0042446	0.0494050855892737	1.42813267813268	22.9542539546815	31	295	hormone biosynthetic process	12	purple
GO:0010646	0.0496774578274718	1.53055051421658	15.2509619495511	22	196	regulation of cell communication	12	purple
GOBPID	Pvalue	OddsRatio	ExpCount	Count	Size	GOTerm	ModuleNumber	ModuleColor
GO:0090304	0.000419347555976775	2.24873590042785	17.2740487387773	31	888	nucleic acid metabolic process	13	darkgrey
GO:0006323	0.000510684274966175	8.83139534883721	0.680846515604959	5	35	DNA packaging	13	darkgrey
GO:0032774	0.000679157959488765	2.66098531535021	7.91727233860624	18	407	RNA biosynthetic process	13	darkgrey
GO:0006351	0.000679157959488765	2.66098531535021	7.91727233860624	18	407	transcription, DNA-templated	13	darkgrey
GO:0006139	0.000977976358123258	2.07027803426695	20.6199230440359	34	1060	nucleobase-containing compound metabolic process	13	darkgrey
GO:0031668	0.00137974205137063	17.3409090909091	0.233433091064558	3	12	cellular response to extracellular stimulus	13	darkgrey
GO:0071496	0.00137974205137063	17.3409090909091	0.233433091064558	3	12	cellular response to external stimulus	13	darkgrey
GO:0065004	0.00166982423000414	9.12343828085957	0.525224454895254	4	27	protein-DNA complex assembly	13	darkgrey
GO:0051276	0.00176553445683165	3.61951219512195	2.80119709277469	9	144	chromosome organization	13	darkgrey
GO:0071103	0.00182243194010713	6.44639818491208	0.894826849080804	5	46	DNA conformation change	13	darkgrey
GO:0006725	0.00190039656856914	1.97262169508278	21.3785805899957	34	1099	cellular aromatic compound metabolic process	13	darkgrey
GO:0006352	0.00191943967953757	8.74137931034483	0.544677212483967	4	28	DNA-templated transcription, initiation	13	darkgrey
GO:0046483	0.00216449281390163	1.95346707869394	21.5342026507054	34	1107	heterocycle metabolic process	13	darkgrey
GO:0034645	0.00236746317370236	2.06944818304172	14.9591705857204	26	769	cellular macromolecule biosynthetic process	13	darkgrey
GO:0071824	0.00249404517949934	8.06542882404951	0.583582727661394	4	30	protein-DNA complex subunit organization	13	darkgrey
GO:0009059	0.0027992900681158	2.03989361702128	15.1342454040188	26	778	macromolecule biosynthetic process	13	darkgrey
GO:0006333	0.00282143021812657	7.76500638569604	0.603035485250107	4	31	chromatin assembly or disassembly	13	darkgrey
GO:0019219	0.00293166547879068	2.35304054054054	8.26742197520308	17	425	regulation of nucleobase-containing compound metabolic process	13	darkgrey
GO:0034641	0.00301672751186455	1.90451906732095	21.9427105600684	34	1128	cellular nitrogen compound metabolic process	13	darkgrey
GO:1901360	0.00315972687720143	1.8976794767228	22.0010688328345	34	1131	organic cyclic compound metabolic process	13	darkgrey
GO:0006325	0.00344394545051439	3.94035087719298	1.98418127404874	7	102	chromatin organization	13	darkgrey
GO:0051171	0.00356444725396934	2.30337188149688	8.42304403591278	17	433	regulation of nitrogen compound metabolic process	13	darkgrey
GO:0006807	0.00381942995797628	1.85163150705722	24.004702864472	36	1234	nitrogen compound metabolic process	13	darkgrey
GO:0006366	0.00427345032401506	3.13831628638867	3.19025224454895	9	164	transcription from RNA polymerase II promoter	13	darkgrey
GO:0009991	0.00470285098823697	10.3909090909091	0.350149636596836	3	18	response to extracellular stimulus	13	darkgrey
GO:0006367	0.00550675261146853	9.73934659090909	0.369602394185549	3	19	transcription initiation from RNA polymerase II promoter	13	darkgrey
GO:0009987	0.0057161205286921	2.21262956548711	69.9715690466011	80	3597	cellular process	13	darkgrey
GO:0010468	0.0061810187528053	2.1652027027027	8.8899102180419	17	457	regulation of gene expression	13	darkgrey
GO:0019222	0.00664318019037374	1.97351324337831	12.8388200085507	22	660	regulation of metabolic process	13	darkgrey
GO:0016070	0.00676379854471554	1.96992583520446	12.8582727661394	22	661	RNA metabolic process	13	darkgrey
GO:0016545	0.0073760992381592	20.5932584269663	0.136169303120992	2	7	male courtship behavior, veined wing vibration	13	darkgrey
GO:0048065	0.0073760992381592	20.5932584269663	0.136169303120992	2	7	male courtship behavior, veined wing extension	13	darkgrey
GO:0045433	0.0073760992381592	20.5932584269663	0.136169303120992	2	7	male courtship behavior, veined wing generated song production	13	darkgrey
GO:0050896	0.00762258036754877	1.78490907072981	21.4174861051732	32	1101	response to stimulus	13	darkgrey
GO:0043414	0.00839124086616727	8.19617224880383	0.427960666951689	3	22	macromolecule methylation	13	darkgrey
GO:0006334	0.00839124086616727	8.19617224880383	0.427960666951689	3	22	nucleosome assembly	13	darkgrey
GO:0034654	0.0084372404748036	2.04762566339715	9.94035912783241	18	511	nucleobase-containing compound biosynthetic process	13	darkgrey
GO:0051056	0.0085320889501784	5.50393224440411	0.817015818725951	4	42	regulation of small GTPase mediated signal transduction	13	darkgrey
GO:0006260	0.00876487419747592	4.31376286694625	1.28388200085507	5	66	DNA replication	13	darkgrey
GO:0043170	0.00882275790765805	1.69094247246022	36.415562206071	48	1872	macromolecule metabolic process	13	darkgrey
GO:0010467	0.00889338660088924	1.77092985842986	20.7560923471569	31	1067	gene expression	13	darkgrey
GO:0031497	0.00951581146530539	7.78465909090909	0.447413424540402	3	23	chromatin assembly	13	darkgrey
GO:0051704	0.00978436793981793	2.35443037974684	5.64129970072681	12	290	multi-organism process	13	darkgrey
GO:0019438	0.0116985239163728	1.97115229653505	10.2710560068405	18	528	aromatic compound biosynthetic process	13	darkgrey
GO:0006996	0.0119344279951522	2.00283440219881	9.51239846088072	17	489	organelle organization	13	darkgrey
GO:0034728	0.0120175160841462	7.07386363636364	0.486318939717828	3	25	nucleosome organization	13	darkgrey
GO:0031323	0.0126649971352702	1.92105395106298	11.1464300983326	19	573	regulation of cellular metabolic process	13	darkgrey
GO:0060255	0.0126649971352702	1.92105395106298	11.1464300983326	19	573	regulation of macromolecule metabolic process	13	darkgrey
GO:0080090	0.0131193634836422	1.91319444444444	11.18533561351	19	575	regulation of primary metabolic process	13	darkgrey
GO:0051254	0.0132503012782988	3.86371409028728	1.42005130397606	5	73	positive regulation of RNA metabolic process	13	darkgrey
GO:0032259	0.0133967076217213	6.76482213438735	0.505771697306541	3	26	methylation	13	darkgrey
GO:0051252	0.0135445220129794	2.10939060939061	7.35314236853356	14	378	regulation of RNA metabolic process	13	darkgrey
GO:0050794	0.0136962244981351	1.6657018406632	25.8721675929885	36	1330	regulation of cellular process	13	darkgrey
GO:0016568	0.0139973510874675	3.80687563195147	1.43950406156477	5	74	chromatin modification	13	darkgrey
GO:0018130	0.0150859813591696	1.91190003137091	10.5433946130825	18	542	heterocycle biosynthetic process	13	darkgrey
GO:0016579	0.0152169894611757	12.8623595505618	0.194527575887131	2	10	protein deubiquitination	13	darkgrey
GO:0031669	0.0152169894611757	12.8623595505618	0.194527575887131	2	10	cellular response to nutrient levels	13	darkgrey
GO:0006259	0.0168409662472263	2.34945280069006	4.64920906370244	10	239	DNA metabolic process	13	darkgrey
GO:0050789	0.0172060948991633	1.62213156552779	28.0897819581018	38	1444	regulation of biological process	13	darkgrey
GO:0044271	0.0173459613065407	1.87944175507261	10.6990166737922	18	550	cellular nitrogen compound biosynthetic process	13	darkgrey
GO:1901362	0.0173459613065407	1.87944175507261	10.6990166737922	18	550	organic cyclic compound biosynthetic process	13	darkgrey
GO:2000112	0.0181590957834013	2.02453102453102	7.62548097477555	14	392	regulation of cellular macromolecule biosynthetic process	13	darkgrey
GO:0030261	0.0183653140351598	11.4307116104869	0.213980333475844	2	11	chromosome condensation	13	darkgrey
GO:0030522	0.0183653140351598	11.4307116104869	0.213980333475844	2	11	intracellular receptor signaling pathway	13	darkgrey
GO:0007266	0.0183653140351598	11.4307116104869	0.213980333475844	2	11	Rho protein signal transduction	13	darkgrey
GO:0070646	0.0183653140351598	11.4307116104869	0.213980333475844	2	11	protein modification by small protein removal	13	darkgrey
GO:2001141	0.0184242311789476	2.0752688172043	6.88627618640445	13	354	regulation of RNA biosynthetic process	13	darkgrey
GO:0006355	0.0184242311789476	2.0752688172043	6.88627618640445	13	354	regulation of transcription, DNA-templated	13	darkgrey
GO:0045935	0.0190809436182953	3.49767441860465	1.55622060709705	5	80	positive regulation of nucleobase-containing compound metabolic process	13	darkgrey
GO:0046416	0.0194527575887131	Inf	0.0194527575887131	1	1	D-amino acid metabolic process	13	darkgrey
GO:0030263	0.0194527575887131	Inf	0.0194527575887131	1	1	apoptotic chromosome condensation	13	darkgrey
GO:0039703	0.0194527575887131	Inf	0.0194527575887131	1	1	RNA replication	13	darkgrey
GO:1902400	0.0194527575887131	Inf	0.0194527575887131	1	1	intracellular signal transduction involved in G1 DNA damage checkpoint	13	darkgrey
GO:1902402	0.0194527575887131	Inf	0.0194527575887131	1	1	signal transduction involved in mitotic DNA damage checkpoint	13	darkgrey
GO:1902403	0.0194527575887131	Inf	0.0194527575887131	1	1	signal transduction involved in mitotic DNA integrity checkpoint	13	darkgrey
GO:0045091	0.0194527575887131	Inf	0.0194527575887131	1	1	regulation of single stranded viral RNA replication via double stranded DNA intermediate	13	darkgrey
GO:0045070	0.0194527575887131	Inf	0.0194527575887131	1	1	positive regulation of viral genome replication	13	darkgrey
GO:0006977	0.0194527575887131	Inf	0.0194527575887131	1	1	DNA damage response, signal transduction by p53 class mediator resulting in cell cycle arrest	13	darkgrey
GO:0039692	0.0194527575887131	Inf	0.0194527575887131	1	1	single stranded viral RNA replication via double stranded DNA intermediate	13	darkgrey
GO:0039694	0.0194527575887131	Inf	0.0194527575887131	1	1	viral RNA genome replication	13	darkgrey
GO:0072395	0.0194527575887131	Inf	0.0194527575887131	1	1	signal transduction involved in cell cycle checkpoint	13	darkgrey
GO:0051154	0.0194527575887131	Inf	0.0194527575887131	1	1	negative regulation of striated muscle cell differentiation	13	darkgrey
GO:0072332	0.0194527575887131	Inf	0.0194527575887131	1	1	intrinsic apoptotic signaling pathway by p53 class mediator	13	darkgrey
GO:0072422	0.0194527575887131	Inf	0.0194527575887131	1	1	signal transduction involved in DNA damage checkpoint	13	darkgrey
GO:0072413	0.0194527575887131	Inf	0.0194527575887131	1	1	signal transduction involved in mitotic cell cycle checkpoint	13	darkgrey
GO:0072431	0.0194527575887131	Inf	0.0194527575887131	1	1	signal transduction involved in mitotic G1 DNA damage checkpoint	13	darkgrey
GO:0072401	0.0194527575887131	Inf	0.0194527575887131	1	1	signal transduction involved in DNA integrity checkpoint	13	darkgrey
GO:0045870	0.0194527575887131	Inf	0.0194527575887131	1	1	positive regulation of single stranded viral RNA replication via double stranded DNA intermediate	13	darkgrey
GO:0022616	0.0194527575887131	Inf	0.0194527575887131	1	1	DNA strand elongation	13	darkgrey
GO:0048524	0.0194527575887131	Inf	0.0194527575887131	1	1	positive regulation of viral process	13	darkgrey
GO:0019478	0.0194527575887131	Inf	0.0194527575887131	1	1	D-amino acid catabolic process	13	darkgrey
GO:0007282	0.0194527575887131	Inf	0.0194527575887131	1	1	cystoblast division	13	darkgrey
GO:0007284	0.0194527575887131	Inf	0.0194527575887131	1	1	spermatogonial cell division	13	darkgrey
GO:0043902	0.0194527575887131	Inf	0.0194527575887131	1	1	positive regulation of multi-organism process	13	darkgrey
GO:0071156	0.0194527575887131	Inf	0.0194527575887131	1	1	regulation of cell cycle arrest	13	darkgrey
GO:0071158	0.0194527575887131	Inf	0.0194527575887131	1	1	positive regulation of cell cycle arrest	13	darkgrey
GO:0060215	0.0194527575887131	Inf	0.0194527575887131	1	1	primitive hemopoiesis	13	darkgrey
GO:0042771	0.0194527575887131	Inf	0.0194527575887131	1	1	intrinsic apoptotic signaling pathway in response to DNA damage by p53 class mediator	13	darkgrey
GO:0044033	0.0194527575887131	Inf	0.0194527575887131	1	1	multi-organism metabolic process	13	darkgrey
GO:0006271	0.0194527575887131	Inf	0.0194527575887131	1	1	DNA strand elongation involved in DNA replication	13	darkgrey
GO:0010556	0.0200718269663372	1.99572751008782	7.72274476271911	14	397	regulation of macromolecule biosynthetic process	13	darkgrey
GO:0044260	0.0201101239253933	1.5864334546746	32.1165027789654	42	1651	cellular macromolecule metabolic process	13	darkgrey
GO:0044238	0.021573025134697	1.57523706843743	43.9632321504917	54	2260	primary metabolic process	13	darkgrey
GO:0044403	0.0217624284319176	10.285393258427	0.233433091064558	2	12	symbiosis, encompassing mutualism through parasitism	13	darkgrey
GO:0042493	0.0217624284319176	10.285393258427	0.233433091064558	2	12	response to drug	13	darkgrey
GO:0043065	0.0253976836851523	9.34831460674157	0.252885848653271	2	13	positive regulation of apoptotic process	13	darkgrey
GO:0031326	0.0262498066124903	1.91893748568812	7.99508336896109	14	411	regulation of cellular biosynthetic process	13	darkgrey
GO:0051173	0.0263956304120727	3.19412932501418	1.69238991021804	5	87	positive regulation of nitrogen compound metabolic process	13	darkgrey
GO:0009889	0.0272374489019952	1.90840738209159	8.03398888413852	14	413	regulation of biosynthetic process	13	darkgrey
GO:0000819	0.0292607430725126	8.56741573033708	0.272338606241984	2	14	sister chromatid segregation	13	darkgrey
GO:0046578	0.0297591772955963	4.85262784090909	0.680846515604959	3	35	regulation of Ras protein signal transduction	13	darkgrey
GO:0000077	0.0333415742138312	7.9066551426102	0.291791363830697	2	15	DNA damage checkpoint	13	darkgrey
GO:0035023	0.0333415742138312	7.9066551426102	0.291791363830697	2	15	regulation of Rho protein signal transduction	13	darkgrey
GO:0031570	0.0333415742138312	7.9066551426102	0.291791363830697	2	15	DNA integrity checkpoint	13	darkgrey
GO:0051716	0.0336296662931355	1.64956014590282	14.8813595553655	22	765	cellular response to stimulus	13	darkgrey
GO:0071704	0.0341089108564897	1.51253314051579	45.908507909363	55	2360	organic substance metabolic process	13	darkgrey
GO:0023051	0.0348484460469732	2.26789510985117	3.79328772979906	8	195	regulation of signaling	13	darkgrey
GO:0010646	0.0357666330476142	2.25531914893617	3.81274048738777	8	196	regulation of cell communication	13	darkgrey
GO:0031667	0.0376304413534082	7.34028892455859	0.31124412141941	2	16	response to nutrient levels	13	darkgrey
GO:0071514	0.0385311837292791	50.9555555555556	0.0389055151774262	1	2	genetic imprinting	13	darkgrey
GO:0030330	0.0385311837292791	50.9555555555556	0.0389055151774262	1	2	DNA damage response, signal transduction by p53 class mediator	13	darkgrey
GO:0032456	0.0385311837292791	50.9555555555556	0.0389055151774262	1	2	endocytic recycling	13	darkgrey
GO:0030262	0.0385311837292791	50.9555555555556	0.0389055151774262	1	2	apoptotic nuclear changes	13	darkgrey
GO:0044783	0.0385311837292791	50.9555555555556	0.0389055151774262	1	2	G1 DNA damage checkpoint	13	darkgrey
GO:0045069	0.0385311837292791	50.9555555555556	0.0389055151774262	1	2	regulation of viral genome replication	13	darkgrey
GO:0008156	0.0385311837292791	50.9555555555556	0.0389055151774262	1	2	negative regulation of DNA replication	13	darkgrey
GO:0006921	0.0385311837292791	50.9555555555556	0.0389055151774262	1	2	cellular component disassembly involved in execution phase of apoptosis	13	darkgrey
GO:0044819	0.0385311837292791	50.9555555555556	0.0389055151774262	1	2	mitotic G1/S transition checkpoint	13	darkgrey
GO:0097194	0.0385311837292791	50.9555555555556	0.0389055151774262	1	2	execution phase of apoptosis	13	darkgrey
GO:0048384	0.0385311837292791	50.9555555555556	0.0389055151774262	1	2	retinoic acid receptor signaling pathway	13	darkgrey
GO:0048385	0.0385311837292791	50.9555555555556	0.0389055151774262	1	2	regulation of retinoic acid receptor signaling pathway	13	darkgrey
GO:0048387	0.0385311837292791	50.9555555555556	0.0389055151774262	1	2	negative regulation of retinoic acid receptor signaling pathway	13	darkgrey
GO:0045314	0.0385311837292791	50.9555555555556	0.0389055151774262	1	2	regulation of compound eye photoreceptor development	13	darkgrey
GO:0000045	0.0385311837292791	50.9555555555556	0.0389055151774262	1	2	autophagic vacuole assembly	13	darkgrey
GO:0072331	0.0385311837292791	50.9555555555556	0.0389055151774262	1	2	signal transduction by p53 class mediator	13	darkgrey
GO:0051123	0.0385311837292791	50.9555555555556	0.0389055151774262	1	2	RNA polymerase II transcriptional preinitiation complex assembly	13	darkgrey
GO:0051148	0.0385311837292791	50.9555555555556	0.0389055151774262	1	2	negative regulation of muscle cell differentiation	13	darkgrey
GO:0019079	0.0385311837292791	50.9555555555556	0.0389055151774262	1	2	viral genome replication	13	darkgrey
GO:0035073	0.0385311837292791	50.9555555555556	0.0389055151774262	1	2	pupariation	13	darkgrey
GO:0045898	0.0385311837292791	50.9555555555556	0.0389055151774262	1	2	regulation of RNA polymerase II transcriptional preinitiation complex assembly	13	darkgrey
GO:0045899	0.0385311837292791	50.9555555555556	0.0389055151774262	1	2	positive regulation of RNA polymerase II transcriptional preinitiation complex assembly	13	darkgrey
GO:0031571	0.0385311837292791	50.9555555555556	0.0389055151774262	1	2	mitotic G1 DNA damage checkpoint	13	darkgrey
GO:0070897	0.0385311837292791	50.9555555555556	0.0389055151774262	1	2	DNA-templated transcriptional preinitiation complex assembly	13	darkgrey
GO:2000142	0.0385311837292791	50.9555555555556	0.0389055151774262	1	2	regulation of DNA-templated transcription, initiation	13	darkgrey
GO:2000134	0.0385311837292791	50.9555555555556	0.0389055151774262	1	2	negative regulation of G1/S transition of mitotic cell cycle	13	darkgrey
GO:0035210	0.0385311837292791	50.9555555555556	0.0389055151774262	1	2	prepupal development	13	darkgrey
GO:0006349	0.0385311837292791	50.9555555555556	0.0389055151774262	1	2	regulation of gene expression by genetic imprinting	13	darkgrey
GO:0060260	0.0385311837292791	50.9555555555556	0.0389055151774262	1	2	regulation of transcription initiation from RNA polymerase II promoter	13	darkgrey
GO:0006266	0.0385311837292791	50.9555555555556	0.0389055151774262	1	2	DNA ligation	13	darkgrey
GO:0007154	0.0397465955379385	1.6157119852772	15.1342454040188	22	778	cell communication	13	darkgrey
GO:0034622	0.041139395426059	2.80945236309077	1.90637024369389	5	98	cellular macromolecular complex assembly	13	darkgrey
GO:0007049	0.0448882477776991	1.96619743975218	5.46622488242839	10	281	cell cycle	13	darkgrey
GO:0065007	0.044993625691731	1.46712670116925	34.6648140230868	43	1782	biological regulation	13	darkgrey
GO:1902531	0.0458803984112181	2.71984011627907	1.96472851646003	5	101	regulation of intracellular signal transduction	13	darkgrey
GO:0022402	0.0480913463344621	2.11421686746988	4.04617357845233	8	208	cell cycle process	13	darkgrey
GO:0045893	0.048509341177866	3.10173271573169	1.38114578879863	4	71	positive regulation of transcription, DNA-templated	13	darkgrey
GO:0023052	0.0489684356361073	1.57316684477942	15.4649422830269	22	795	signaling	13	darkgrey
GO:0035556	0.0492301382627251	2.10321884553138	4.06562633604104	8	209	intracellular signal transduction	13	darkgrey
GOBPID	Pvalue	OddsRatio	ExpCount	Count	Size	GOTerm	ModuleNumber	ModuleColor
GO:0048522	9.09530406306403e-07	1.96848453002039	57.9046601111586	91	257	positive regulation of cellular process	14	blue
GO:0048518	6.3684404769492e-06	1.80260701641455	66.0158187259513	98	293	positive regulation of biological process	14	blue
GO:0007167	3.43086191518357e-05	2.65111111111111	17.7994869602394	34	79	enzyme linked receptor protein signaling pathway	14	blue
GO:0006886	3.65370321058894e-05	2.34584980237154	23.6575459598119	42	105	intracellular protein transport	14	blue
GO:0048583	7.52593569784648e-05	1.83870081294607	45.5126122274476	69	202	regulation of response to stimulus	14	blue
GO:0046907	0.000149366690561518	1.78297083997184	46.4138520735357	69	206	intracellular transport	14	blue
GO:0051649	0.000236146079829885	1.61777777777778	65.5651988029072	91	291	establishment of localization in cell	14	blue
GO:0009966	0.000243391745133352	1.84299359600564	38.077383497221	58	169	regulation of signal transduction	14	blue
GO:0009987	0.00027295487684595	1.35062489855543	810.439931594699	852	3597	cellular process	14	blue
GO:0034333	0.000315932237498835	6.93295019157088	3.37964942283027	10	15	adherens junction assembly	14	blue
GO:0034613	0.000404331227738291	1.98050266565118	27.4878153056862	44	122	cellular protein localization	14	blue
GO:0016331	0.000431917247739023	2.2037037037037	19.8272766139376	34	88	morphogenesis of embryonic epithelium	14	blue
GO:0065008	0.000441456596325688	1.39263877232946	142.395895681915	176	632	regulation of biological quality	14	blue
GO:0033036	0.000442371396307689	1.58159073168728	65.7905087644292	90	292	macromolecule localization	14	blue
GO:0051641	0.000459263716617032	1.54859135285914	72.7751175716118	98	323	cellular localization	14	blue
GO:0023051	0.000487614525087178	1.72374122908474	43.9354424967935	64	195	regulation of signaling	14	blue
GO:0008104	0.000527440677119521	1.63146991584896	54.9756306113724	77	244	protein localization	14	blue
GO:0070727	0.000537462471008798	1.8975105297401	30.1915348439504	47	134	cellular macromolecule localization	14	blue
GO:0010646	0.000569513725672779	1.71019283746556	44.1607524583155	64	196	regulation of cell communication	14	blue
GO:0015031	0.000669961564037926	1.77539925246347	36.9508336896109	55	164	protein transport	14	blue
GO:0007178	0.00071959748428991	4.10173783949	5.40743907652843	13	24	transmembrane receptor protein serine/threonine kinase signaling pathway	14	blue
GO:0051173	0.000766526569878209	2.1367939928175	19.6019666524156	33	87	positive regulation of nitrogen compound metabolic process	14	blue
GO:0009893	0.000779599641930087	1.79194552072326	34.6977340743908	52	154	positive regulation of metabolic process	14	blue
GO:0031325	0.000867444312681963	1.79186440677966	34.0218041898247	51	151	positive regulation of cellular metabolic process	14	blue
GO:0034332	0.000891979886132702	4.76701821668265	4.28088926891834	11	19	adherens junction organization	14	blue
GO:0045186	0.000953228500781791	6.23368421052632	3.15433946130825	9	14	zonula adherens assembly	14	blue
GO:0045184	0.000981196123638901	1.72766585803185	38.3026934587431	56	170	establishment of protein localization	14	blue
GO:0007219	0.00119321481866706	3.75888568683958	5.63274903805045	13	25	Notch signaling pathway	14	blue
GO:0008354	0.001330913454344	6.92160611854684	2.70371953826422	8	12	germ cell migration	14	blue
GO:0045216	0.00133718890630995	3.08798972382787	7.66053869174861	16	34	cell-cell junction organization	14	blue
GO:0065007	0.00162182400066232	1.23728042888102	401.502351432236	443	1782	biological regulation	14	blue
GO:0030855	0.00175582347020964	2.64274396135266	9.91363830696879	19	44	epithelial cell differentiation	14	blue
GO:0007169	0.00182242856566781	2.3555086438067	12.842667806755	23	57	transmembrane receptor protein tyrosine kinase signaling pathway	14	blue
GO:0008105	0.00196303887138314	3.23884615384615	6.53398888413852	14	29	asymmetric protein localization	14	blue
GO:0009891	0.00206903334665595	1.99496785015376	19.8272766139376	32	88	positive regulation of biosynthetic process	14	blue
GO:0007391	0.00219708676948639	2.25893466281816	13.7439076528431	24	61	dorsal closure	14	blue
GO:0002700	0.00236629133481117	10.368320610687	1.80247969217614	6	8	regulation of production of molecular mediator of immune response	14	blue
GO:0023057	0.00259315200834954	2.31976744186047	12.392047883711	22	55	negative regulation of signaling	14	blue
GO:0009968	0.00259315200834954	2.31976744186047	12.392047883711	22	55	negative regulation of signal transduction	14	blue
GO:0010648	0.00259315200834954	2.31976744186047	12.392047883711	22	55	negative regulation of cell communication	14	blue
GO:0048193	0.00265323405494947	3.81150527325024	4.73150919196238	11	21	Golgi vesicle transport	14	blue
GO:0071702	0.00268178515149879	1.51336175522512	57.0034202650705	76	253	organic substance transport	14	blue
GO:0016332	0.00277999358870623	5.5357552581262	2.92902949978623	8	13	establishment or maintenance of polarity of embryonic epithelium	14	blue
GO:0034330	0.00279711495212721	2.7776493256262	8.11115861479265	16	36	cell junction organization	14	blue
GO:0010033	0.0028100158661975	1.79335457441966	26.5865754595981	40	118	response to organic substance	14	blue
GO:1900424	0.00281131838878187	17.2688274547188	1.35185976913211	5	6	regulation of defense response to bacterium	14	blue
GO:0006963	0.00281131838878187	17.2688274547188	1.35185976913211	5	6	positive regulation of antibacterial peptide biosynthetic process	14	blue
GO:0002780	0.00281131838878187	17.2688274547188	1.35185976913211	5	6	antibacterial peptide biosynthetic process	14	blue
GO:0002786	0.00281131838878187	17.2688274547188	1.35185976913211	5	6	regulation of antibacterial peptide production	14	blue
GO:0002778	0.00281131838878187	17.2688274547188	1.35185976913211	5	6	antibacterial peptide production	14	blue
GO:0002808	0.00281131838878187	17.2688274547188	1.35185976913211	5	6	regulation of antibacterial peptide biosynthetic process	14	blue
GO:0031328	0.00282570384061141	1.966391184573	19.3766566908935	31	86	positive regulation of cellular biosynthetic process	14	blue
GO:0045597	0.00283496703725658	3.46641074856046	5.40743907652843	12	24	positive regulation of cell differentiation	14	blue
GO:0071310	0.00283578411710373	2.19887583035258	13.9692176143651	24	62	cellular response to organic substance	14	blue
GO:0071560	0.00349855748295997	4.45017088174983	3.60495938435229	9	16	cellular response to transforming growth factor beta stimulus	14	blue
GO:0071559	0.00349855748295997	4.45017088174983	3.60495938435229	9	16	response to transforming growth factor beta	14	blue
GO:0044106	0.00349855748295997	4.45017088174983	3.60495938435229	9	16	cellular amine metabolic process	14	blue
GO:0009308	0.00349855748295997	4.45017088174983	3.60495938435229	9	16	amine metabolic process	14	blue
GO:0007179	0.00349855748295997	4.45017088174983	3.60495938435229	9	16	transforming growth factor beta receptor signaling pathway	14	blue
GO:0031047	0.00397165521293651	3.84738186462324	4.28088926891834	10	19	gene silencing by RNA	14	blue
GO:0048585	0.00397885037397777	2.16271266416756	13.5185976913211	23	60	negative regulation of response to stimulus	14	blue
GO:0009850	0.00411035189905689	1.44800406814137	65.7905087644292	85	292	auxin metabolic process	14	blue
GO:0009851	0.00411035189905689	1.44800406814137	65.7905087644292	85	292	auxin biosynthetic process	14	blue
GO:0002168	0.00425255604201712	2.85622171945701	6.98460880718256	14	31	instar larval development	14	blue
GO:0061245	0.00434346114335813	3.00461095100865	6.3086789226165	13	28	establishment or maintenance of bipolar cell polarity	14	blue
GO:0035088	0.00434346114335813	3.00461095100865	6.3086789226165	13	28	establishment or maintenance of apical/basal cell polarity	14	blue
GO:0042254	0.00435043062364692	3.19887789753433	5.63274903805045	12	25	ribosome biogenesis	14	blue
GO:0007552	0.00453109151524207	1.65932335133366	32.2193244976486	46	143	metamorphosis	14	blue
GO:0045893	0.00470678952705572	2.01154345006485	15.9970072680633	26	71	positive regulation of transcription, DNA-templated	14	blue
GO:0048598	0.00507218921132781	1.61815451046654	34.9230440359128	49	155	embryonic morphogenesis	14	blue
GO:0042446	0.00556472171480038	1.42606516290727	66.4664386489953	85	295	hormone biosynthetic process	14	blue
GO:0006457	0.00569082518404051	2.27569548559054	10.8148781530569	19	48	protein folding	14	blue
GO:0007472	0.00571616316452045	1.76963775227205	23.4322359982899	35	104	wing disc morphogenesis	14	blue
GO:0030879	0.00574730904045633	6.91030534351145	2.02778965369816	6	9	mammary gland development	14	blue
GO:0006997	0.00574730904045633	6.91030534351145	2.02778965369816	6	9	nucleus organization	14	blue
GO:0001700	0.0057994884484911	1.91193670450636	17.7994869602394	28	79	embryonic development via the syncytial blastoderm	14	blue
GO:1902680	0.0058277067271791	1.96726442226358	16.2223172295853	26	72	positive regulation of RNA biosynthetic process	14	blue
GO:0010628	0.0058277067271791	1.96726442226358	16.2223172295853	26	72	positive regulation of gene expression	14	blue
GO:0048707	0.00583638273553463	1.63899900891972	31.7687045746045	45	141	instar larval or pupal morphogenesis	14	blue
GO:0010604	0.00583638273553463	1.63899900891972	31.7687045746045	45	141	positive regulation of macromolecule metabolic process	14	blue
GO:0016072	0.00596479688754889	3.89282296650718	3.83026934587431	9	17	rRNA metabolic process	14	blue
GO:0006364	0.00596479688754889	3.89282296650718	3.83026934587431	9	17	rRNA processing	14	blue
GO:0048563	0.0059877026009101	1.66762486525332	29.2902949978623	42	130	post-embryonic organ morphogenesis	14	blue
GO:0007560	0.0059877026009101	1.66762486525332	29.2902949978623	42	130	imaginal disc morphogenesis	14	blue
GO:0034504	0.00627755423933784	2.81604226705091	6.53398888413852	13	29	protein localization to nucleus	14	blue
GO:0032879	0.00634027525464148	1.87046070460705	18.7007268063275	29	83	regulation of localization	14	blue
GO:0043603	0.00645058835999806	2.96956402522621	5.85805899957247	12	26	cellular amide metabolic process	14	blue
GO:0070887	0.0064631360172986	1.97676473186677	15.5463873450192	25	69	cellular response to chemical stimulus	14	blue
GO:0009886	0.00673433849052473	1.62164233241037	31.9940145361265	45	142	post-embryonic morphogenesis	14	blue
GO:0019222	0.00692383072569748	1.2766835016835	148.704574604532	174	660	regulation of metabolic process	14	blue
GO:0045935	0.00705484207436966	1.87464387464387	18.0247969217614	28	80	positive regulation of nucleobase-containing compound metabolic process	14	blue
GO:0051254	0.00716161072578868	1.92486960841129	16.4476271911073	26	73	positive regulation of RNA metabolic process	14	blue
GO:0034470	0.00737731402222814	2.1992270531401	11.0401881145789	19	49	ncRNA processing	14	blue
GO:0050678	0.00778880066249509	4.83915950334288	2.70371953826422	7	12	regulation of epithelial cell proliferation	14	blue
GO:0002440	0.00778880066249509	4.83915950334288	2.70371953826422	7	12	production of molecular mediator of immune response	14	blue
GO:0072524	0.00778880066249509	4.83915950334288	2.70371953826422	7	12	pyridine-containing compound metabolic process	14	blue
GO:0016458	0.00779795649615258	2.47696961363949	8.11115861479265	15	36	gene silencing	14	blue
GO:0030307	0.00801072151308679	8.63203050524309	1.57716973065413	5	7	positive regulation of cell growth	14	blue
GO:0035966	0.00801072151308679	8.63203050524309	1.57716973065413	5	7	response to topologically incorrect protein	14	blue
GO:0006986	0.00801072151308679	8.63203050524309	1.57716973065413	5	7	response to unfolded protein	14	blue
GO:0046621	0.00801072151308679	8.63203050524309	1.57716973065413	5	7	negative regulation of organ growth	14	blue
GO:0034250	0.00801072151308679	8.63203050524309	1.57716973065413	5	7	positive regulation of cellular amide metabolic process	14	blue
GO:0034248	0.00801072151308679	8.63203050524309	1.57716973065413	5	7	regulation of cellular amide metabolic process	14	blue
GO:0045571	0.00801072151308679	8.63203050524309	1.57716973065413	5	7	negative regulation of imaginal disc growth	14	blue
GO:0007280	0.00801072151308679	8.63203050524309	1.57716973065413	5	7	pole cell migration	14	blue
GO:0002759	0.00801072151308679	8.63203050524309	1.57716973065413	5	7	regulation of antimicrobial humoral response	14	blue
GO:0002784	0.00801072151308679	8.63203050524309	1.57716973065413	5	7	regulation of antimicrobial peptide production	14	blue
GO:0002775	0.00801072151308679	8.63203050524309	1.57716973065413	5	7	antimicrobial peptide production	14	blue
GO:0002777	0.00801072151308679	8.63203050524309	1.57716973065413	5	7	antimicrobial peptide biosynthetic process	14	blue
GO:0002831	0.00801072151308679	8.63203050524309	1.57716973065413	5	7	regulation of response to biotic stimulus	14	blue
GO:0002805	0.00801072151308679	8.63203050524309	1.57716973065413	5	7	regulation of antimicrobial peptide biosynthetic process	14	blue
GO:0002807	0.00801072151308679	8.63203050524309	1.57716973065413	5	7	positive regulation of antimicrobial peptide biosynthetic process	14	blue
GO:0002920	0.00801072151308679	8.63203050524309	1.57716973065413	5	7	regulation of humoral immune response	14	blue
GO:0010817	0.00821476358939974	1.3893360814788	70.0713980333476	88	311	regulation of hormone levels	14	blue
GO:0006796	0.00828243186815362	1.29119004615693	125.04702864472	148	555	phosphate-containing compound metabolic process	14	blue
GO:0002165	0.00867995846780702	1.55753957485301	35.8242838820009	49	159	instar larval or pupal development	14	blue
GO:0007476	0.00889161538748895	1.71739130434783	23.2069260367679	34	103	imaginal disc-derived wing morphogenesis	14	blue
GO:0016441	0.00899454606049035	3.95192570335974	3.37964942283027	8	15	posttranscriptional gene silencing	14	blue
GO:0035194	0.00899454606049035	3.95192570335974	3.37964942283027	8	15	posttranscriptional gene silencing by RNA	14	blue
GO:0010557	0.0094997745086838	1.84185806747236	17.5741769987174	27	78	positive regulation of macromolecule biosynthetic process	14	blue
GO:0043297	0.00959716025974996	2.92949332546648	5.40743907652843	11	24	apical junction assembly	14	blue
GO:0070848	0.00959716025974996	2.92949332546648	5.40743907652843	11	24	response to growth factor	14	blue
GO:0071363	0.00959716025974996	2.92949332546648	5.40743907652843	11	24	cellular response to growth factor stimulus	14	blue
GO:0009100	0.00961669506975416	2.3121387283237	9.01239846088072	16	40	glycoprotein metabolic process	14	blue
GO:0032101	0.00973213432833247	3.14611633577151	4.73150919196238	10	21	regulation of response to external stimulus	14	blue
GO:0006913	0.0104444497910377	2.36372386035524	8.33646857631466	15	37	nucleocytoplasmic transport	14	blue
GO:0009101	0.0104444497910377	2.36372386035524	8.33646857631466	15	37	glycoprotein biosynthetic process	14	blue
GO:0061180	0.0105229410544176	13.8019047619048	1.12654980761009	4	5	mammary gland epithelium development	14	blue
GO:0035160	0.0105229410544176	13.8019047619048	1.12654980761009	4	5	maintenance of epithelial integrity, open tracheal system	14	blue
GO:0035120	0.0109365509005368	1.67078925080995	24.3334758443779	35	108	post-embryonic appendage morphogenesis	14	blue
GO:0007009	0.0114125483906093	Inf	0.675929884566054	3	3	plasma membrane organization	14	blue
GO:0031623	0.0114125483906093	Inf	0.675929884566054	3	3	receptor internalization	14	blue
GO:0043628	0.0114125483906093	Inf	0.675929884566054	3	3	ncRNA 3'-end processing	14	blue
GO:0072525	0.0114125483906093	Inf	0.675929884566054	3	3	pyridine-containing compound biosynthetic process	14	blue
GO:0006177	0.0114125483906093	Inf	0.675929884566054	3	3	GMP biosynthetic process	14	blue
GO:0045746	0.0116470726948401	5.18129770992366	2.25309961522018	6	10	negative regulation of Notch signaling pathway	14	blue
GO:0035195	0.0116470726948401	5.18129770992366	2.25309961522018	6	10	gene silencing by miRNA	14	blue
GO:0043954	0.0116470726948401	5.18129770992366	2.25309961522018	6	10	cellular component maintenance	14	blue
GO:0031323	0.0120490933636446	1.26881432612723	129.102607952116	151	573	regulation of cellular metabolic process	14	blue
GO:0017038	0.0121498908063767	2.50176112712136	6.98460880718256	13	31	protein import	14	blue
GO:0048569	0.012188197096442	1.57573632538569	30.4168448054724	42	135	post-embryonic organ development	14	blue
GO:0006793	0.0124007580451814	1.27005863519501	126.398888413852	148	561	phosphorus metabolic process	14	blue
GO:0060341	0.0125530637554061	2.2190366088632	9.23770842240274	16	41	regulation of cellular localization	14	blue
GO:0009653	0.0126378117261279	1.27093593393153	124.596408721676	146	553	anatomical structure morphogenesis	14	blue
GO:0070085	0.0129744907943232	2.59692898272553	6.3086789226165	12	28	glycosylation	14	blue
GO:0043413	0.0129744907943232	2.59692898272553	6.3086789226165	12	28	macromolecule glycosylation	14	blue
GO:0006486	0.0129744907943232	2.59692898272553	6.3086789226165	12	28	protein glycosylation	14	blue
GO:0050794	0.0130143124125882	1.18911020014468	299.662248824284	329	1330	regulation of cellular process	14	blue
GO:0007015	0.0134216573529345	1.91007751937984	13.9692176143651	22	62	actin filament organization	14	blue
GO:0035220	0.01354458640268	1.57136348350564	29.7409149209064	41	132	wing disc development	14	blue
GO:0006576	0.0136324089152487	4.03151862464183	2.92902949978623	7	13	cellular biogenic amine metabolic process	14	blue
GO:0051647	0.0136324089152487	4.03151862464183	2.92902949978623	7	13	nucleus localization	14	blue
GO:0002697	0.0136324089152487	4.03151862464183	2.92902949978623	7	13	regulation of immune effector process	14	blue
GO:0006606	0.0137195906881166	2.71949048075606	5.63274903805045	11	25	protein import into nucleus	14	blue
GO:0043069	0.0137195906881166	2.71949048075606	5.63274903805045	11	25	negative regulation of programmed cell death	14	blue
GO:1902593	0.0137195906881166	2.71949048075606	5.63274903805045	11	25	single-organism nuclear import	14	blue
GO:0051170	0.0137195906881166	2.71949048075606	5.63274903805045	11	25	nuclear import	14	blue
GO:0051169	0.0137487296724588	2.26032556387831	8.56177853783668	15	38	nuclear transport	14	blue
GO:0009792	0.0139801027361038	1.51007468701306	35.8242838820009	48	159	embryo development ending in birth or egg hatching	14	blue
GO:0042445	0.0140162533428994	1.35725677830941	68.7195382642155	85	305	hormone metabolic process	14	blue
GO:0006396	0.0142697217033358	1.44916810097533	44.6113723813596	58	198	RNA processing	14	blue
GO:0050673	0.0144905346380207	3.45697896749522	3.60495938435229	8	16	epithelial cell proliferation	14	blue
GO:0045787	0.0144905346380207	3.45697896749522	3.60495938435229	8	16	positive regulation of cell cycle	14	blue
GO:0043604	0.0144905346380207	3.45697896749522	3.60495938435229	8	16	amide biosynthetic process	14	blue
GO:0042176	0.0144905346380207	3.45697896749522	3.60495938435229	8	16	regulation of protein catabolic process	14	blue
GO:0071495	0.014621852390948	2.10538641686183	10.1389482684908	17	45	cellular response to endogenous stimulus	14	blue
GO:0043067	0.0146675011932484	1.85782599869172	14.8704574604532	23	66	regulation of programmed cell death	14	blue
GO:0016310	0.0152658101479629	1.35071842502183	68.9448482257375	85	306	phosphorylation	14	blue
GO:0080134	0.0161469625534197	2.13309619089966	9.46301838392476	16	42	regulation of response to stress	14	blue
GO:0007444	0.0166486169189247	1.46481231086215	39.6545532278752	52	176	imaginal disc development	14	blue
GO:0044085	0.0166875427598815	1.3486668955258	67.3676784950834	83	299	cellular component biogenesis	14	blue
GO:0001737	0.0174181051435461	5.75309818875119	1.80247969217614	5	8	establishment of imaginal disc-derived wing hair orientation	14	blue
GO:0050680	0.0174181051435461	5.75309818875119	1.80247969217614	5	8	negative regulation of epithelial cell proliferation	14	blue
GO:0006024	0.0174181051435461	5.75309818875119	1.80247969217614	5	8	glycosaminoglycan biosynthetic process	14	blue
GO:0032012	0.0174181051435461	5.75309818875119	1.80247969217614	5	8	regulation of ARF protein signal transduction	14	blue
GO:0034329	0.017701740127254	2.44349102404877	6.53398888413852	12	29	cell junction assembly	14	blue
GO:0002164	0.018458184013152	2.03222159412097	10.3642582300128	17	46	larval development	14	blue
GO:0060548	0.0190501923954036	2.53748801534036	5.85805899957247	11	26	negative regulation of cell death	14	blue
GO:0007043	0.0190501923954036	2.53748801534036	5.85805899957247	11	26	cell-cell junction assembly	14	blue
GO:0060429	0.0192380510058496	1.42819946462268	43.4848225737495	56	193	epithelium development	14	blue
GO:0051094	0.0196104775296688	2.20402097902098	8.11115861479265	14	36	positive regulation of developmental process	14	blue
GO:0006468	0.020097744656424	1.37921211037607	53.3984608807183	67	237	protein phosphorylation	14	blue
GO:0048737	0.0201253065339567	1.56660117878193	26.1359555365541	36	116	imaginal disc-derived appendage development	14	blue
GO:0035315	0.0203171904717015	2.66062481579723	5.18212911500641	10	23	hair cell differentiation	14	blue
GO:1902531	0.0203924860003324	1.61320513911342	22.7563061137238	32	101	regulation of intracellular signal transduction	14	blue
GO:0048519	0.0204291560095329	1.31169840652934	77.0560068405301	93	342	negative regulation of biological process	14	blue
GO:0031347	0.0207975201793599	4.14389312977099	2.4784095767422	6	11	regulation of defense response	14	blue
GO:0042742	0.0207975201793599	4.14389312977099	2.4784095767422	6	11	defense response to bacterium	14	blue
GO:0016336	0.0207975201793599	4.14389312977099	2.4784095767422	6	11	establishment or maintenance of polarity of larval imaginal disc epithelium	14	blue
GO:1902582	0.021015311423289	1.48922426223205	33.1205643437366	44	147	single-organism intracellular transport	14	blue
GO:0016482	0.0210373483269102	1.65257097161136	20.2778965369816	29	90	cytoplasmic transport	14	blue
GO:0010941	0.0212313093410479	1.7742644681539	15.3210773834972	23	68	regulation of cell death	14	blue
GO:0002252	0.0213867557399217	2.82879512831666	4.50619923044036	9	20	immune effector process	14	blue
GO:0048523	0.0213900379510082	1.32902106287826	68.0436083796494	83	302	negative regulation of cellular process	14	blue
GO:0008595	0.0215484594367456	2.25033621517771	7.43522873022659	13	33	anterior/posterior axis specification, embryo	14	blue
GO:0007351	0.0215484594367456	2.25033621517771	7.43522873022659	13	33	tripartite regional subdivision	14	blue
GO:0043043	0.022049137457892	3.45463228271251	3.15433946130825	7	14	peptide biosynthetic process	14	blue
GO:0051272	0.022049137457892	3.45463228271251	3.15433946130825	7	14	positive regulation of cellular component movement	14	blue
GO:0016335	0.022049137457892	3.45463228271251	3.15433946130825	7	14	morphogenesis of larval imaginal disc epithelium	14	blue
GO:0050776	0.0220689681939957	3.07202039515615	3.83026934587431	8	17	regulation of immune response	14	blue
GO:0044237	0.0223679611661151	1.15380106940299	530.830269345874	560	2356	cellular metabolic process	14	blue
GO:0051049	0.0227495996450766	1.8824292615597	12.166737922189	19	54	regulation of transport	14	blue
GO:0043207	0.025189798761879	2.10760869565217	8.33646857631466	14	37	response to external biotic stimulus	14	blue
GO:0051707	0.025189798761879	2.10760869565217	8.33646857631466	14	37	response to other organism	14	blue
GO:0035114	0.0255351226581612	1.54128520142607	25.68533561351	35	114	imaginal disc-derived appendage morphogenesis	14	blue
GO:0016477	0.0255351226581612	1.54128520142607	25.68533561351	35	114	cell migration	14	blue
GO:0048729	0.025640041604934	1.41178668659585	41.4570329200513	53	184	tissue morphogenesis	14	blue
GO:0022613	0.0256567059076351	1.97963115882191	9.91363830696879	16	44	ribonucleoprotein complex biogenesis	14	blue
GO:0009791	0.0257737750770755	1.40641791044776	42.3582727661394	54	188	post-embryonic development	14	blue
GO:0060255	0.0259277800851697	1.22958576808207	129.102607952116	148	573	regulation of macromolecule metabolic process	14	blue
GO:0016575	0.0259461863856891	6.89904761904762	1.35185976913211	4	6	histone deacetylation	14	blue
GO:0048015	0.0259461863856891	6.89904761904762	1.35185976913211	4	6	phosphatidylinositol-mediated signaling	14	blue
GO:0048017	0.0259461863856891	6.89904761904762	1.35185976913211	4	6	inositol lipid-mediated signaling	14	blue
GO:0007494	0.0259461863856891	6.89904761904762	1.35185976913211	4	6	midgut development	14	blue
GO:0045666	0.0259461863856891	6.89904761904762	1.35185976913211	4	6	positive regulation of neuron differentiation	14	blue
GO:0043627	0.0259461863856891	6.89904761904762	1.35185976913211	4	6	response to estrogen	14	blue
GO:0035196	0.0259461863856891	6.89904761904762	1.35185976913211	4	6	production of miRNAs involved in gene silencing by miRNA	14	blue
GO:0042439	0.0259461863856891	6.89904761904762	1.35185976913211	4	6	ethanolamine-containing compound metabolic process	14	blue
GO:0034976	0.0259461863856891	6.89904761904762	1.35185976913211	4	6	response to endoplasmic reticulum stress	14	blue
GO:0010669	0.0259461863856891	6.89904761904762	1.35185976913211	4	6	epithelial structure maintenance	14	blue
GO:0030036	0.0261247946192017	1.52752887057358	26.5865754595981	36	118	actin cytoskeleton organization	14	blue
GO:0006357	0.0266737085867329	1.5147550465614	27.4878153056862	37	122	regulation of transcription from RNA polymerase II promoter	14	blue
GO:0030029	0.0266737085867329	1.5147550465614	27.4878153056862	37	122	actin filament-based process	14	blue
GO:0032880	0.0279743549088099	2.46989600437876	5.40743907652843	10	24	regulation of protein localization	14	blue
GO:0045197	0.0279743549088099	2.46989600437876	5.40743907652843	10	24	establishment or maintenance of epithelial cell apical/basal polarity	14	blue
GO:0051704	0.0299015018209541	1.31061854417305	65.3398888413852	79	290	multi-organism process	14	blue
GO:0032386	0.0301277217986138	2.59234449760766	4.73150919196238	9	21	regulation of intracellular transport	14	blue
GO:0006518	0.0301277217986138	2.59234449760766	4.73150919196238	9	21	peptide metabolic process	14	blue
GO:0043066	0.0301277217986138	2.59234449760766	4.73150919196238	9	21	negative regulation of apoptotic process	14	blue
GO:0019730	0.0301277217986138	2.59234449760766	4.73150919196238	9	21	antimicrobial humoral response	14	blue
GO:1901566	0.0302989480825408	1.42414403523164	36.5002137665669	47	162	organonitrogen compound biosynthetic process	14	blue
GO:0044702	0.0315268496592012	1.353125	50.018811457888	62	222	single organism reproductive process	14	blue
GO:0007369	0.0318637557307076	2.01923076923077	8.56177853783668	14	38	gastrulation	14	blue
GO:0040029	0.0318637557307076	2.01923076923077	8.56177853783668	14	38	regulation of gene expression, epigenetic	14	blue
GO:0009948	0.0318637557307076	2.01923076923077	8.56177853783668	14	38	anterior/posterior axis specification	14	blue
GO:0010038	0.0320066002724084	4.31363203050524	2.02778965369816	5	9	response to metal ion	14	blue
GO:0009636	0.0320066002724084	4.31363203050524	2.02778965369816	5	9	response to toxic substance	14	blue
GO:0060627	0.0320610864987037	2.76405353728489	4.05557930739632	8	18	regulation of vesicle-mediated transport	14	blue
GO:0010256	0.0320610864987037	2.76405353728489	4.05557930739632	8	18	endomembrane system organization	14	blue
GO:0016070	0.0321248947751459	1.20423628313316	148.929884566054	168	661	RNA metabolic process	14	blue
GO:0034660	0.0325318407939424	1.57378048780488	20.9538264215477	29	93	ncRNA metabolic process	14	blue
GO:0046620	0.0334719049306185	3.02196752626552	3.37964942283027	7	15	regulation of organ growth	14	blue
GO:0098542	0.0338062396962246	3.45229007633588	2.70371953826422	6	12	defense response to other organism	14	blue
GO:0008593	0.0338062396962246	3.45229007633588	2.70371953826422	6	12	regulation of Notch signaling pathway	14	blue
GO:0050789	0.0340892217312417	1.14973720292505	325.347584437794	350	1444	regulation of biological process	14	blue
GO:0016192	0.0345328808483042	1.35811703188593	46.6391620350577	58	207	vesicle-mediated transport	14	blue
GO:0050793	0.0345328808483042	1.35811703188593	46.6391620350577	58	207	regulation of developmental process	14	blue
GO:0002682	0.0355065893584184	1.92332370869426	9.46301838392476	15	42	regulation of immune system process	14	blue
GO:0042221	0.0358159013955093	1.30655534941249	61.2843095339889	74	272	response to chemical	14	blue
GO:0071840	0.0363501805896549	1.17542647721819	197.371526293288	218	876	cellular component organization or biogenesis	14	blue
GO:0002009	0.0374510259810468	1.38776847469967	38.7533133817871	49	172	morphogenesis of an epithelium	14	blue
GO:0043933	0.0374877937976924	1.33564814814815	50.469431380932	62	224	macromolecular complex subunit organization	14	blue
GO:0051128	0.037711431053131	1.37289058247142	41.4570329200513	52	184	regulation of cellular component organization	14	blue
GO:0006890	0.0379531315141823	10.3415794481446	0.901239846088072	3	4	retrograde vesicle-mediated transport, Golgi to ER	14	blue
GO:0035967	0.0379531315141823	10.3415794481446	0.901239846088072	3	4	cellular response to topologically incorrect protein	14	blue
GO:0090092	0.0379531315141823	10.3415794481446	0.901239846088072	3	4	regulation of transmembrane receptor protein serine/threonine kinase signaling pathway	14	blue
GO:0046834	0.0379531315141823	10.3415794481446	0.901239846088072	3	4	lipid phosphorylation	14	blue
GO:0030968	0.0379531315141823	10.3415794481446	0.901239846088072	3	4	endoplasmic reticulum unfolded protein response	14	blue
GO:0048790	0.0379531315141823	10.3415794481446	0.901239846088072	3	4	maintenance of presynaptic active zone structure	14	blue
GO:0034620	0.0379531315141823	10.3415794481446	0.901239846088072	3	4	cellular response to unfolded protein	14	blue
GO:0048617	0.0379531315141823	10.3415794481446	0.901239846088072	3	4	embryonic foregut morphogenesis	14	blue
GO:0046037	0.0379531315141823	10.3415794481446	0.901239846088072	3	4	GMP metabolic process	14	blue
GO:0010629	0.0379992521212326	1.60619803476946	17.7994869602394	25	79	negative regulation of gene expression	14	blue
GO:0023056	0.0388311499850167	1.84662813102119	10.3642582300128	16	46	positive regulation of signaling	14	blue
GO:0010647	0.0388311499850167	1.84662813102119	10.3642582300128	16	46	positive regulation of cell communication	14	blue
GO:0051493	0.0397344222249811	1.93792307692308	8.7870884993587	14	39	regulation of cytoskeleton organization	14	blue
GO:0009607	0.0397344222249811	1.93792307692308	8.7870884993587	14	39	response to biotic stimulus	14	blue
GO:0061458	0.0410793043209358	2.39227088700773	4.9568191534844	9	22	reproductive system development	14	blue
GO:0048608	0.0410793043209358	2.39227088700773	4.9568191534844	9	22	reproductive structure development	14	blue
GO:0009894	0.0418532737382609	1.78390461997019	11.2654980761009	17	50	regulation of catabolic process	14	blue
GO:0009719	0.0419683295058798	1.69033353776478	13.7439076528431	20	61	response to endogenous stimulus	14	blue
GO:0022604	0.0424728113555505	1.60059746079164	17.1235570756734	24	76	regulation of cell morphogenesis	14	blue
GO:0022603	0.0425108727795044	1.52523281596452	21.4044463445917	29	95	regulation of anatomical structure morphogenesis	14	blue
GO:0035282	0.0438660545984483	1.57655269900168	18.0247969217614	25	80	segmentation	14	blue
GO:0000578	0.044489640987805	1.9551852315917	8.11115861479265	13	36	embryonic axis specification	14	blue
GO:0044700	0.0445743074708161	1.1757921450347	171.460880718256	190	761	single organism signaling	14	blue
GO:0048332	0.0447416811135665	2.51208065357205	4.28088926891834	8	19	mesoderm morphogenesis	14	blue
GO:0007314	0.0447416811135665	2.51208065357205	4.28088926891834	8	19	oocyte anterior/posterior axis specification	14	blue
GO:0035317	0.0447416811135665	2.51208065357205	4.28088926891834	8	19	imaginal disc-derived wing hair organization	14	blue
GO:0010468	0.0447926148044042	1.22163603358294	102.966652415562	118	457	regulation of gene expression	14	blue
GO:0009952	0.0458285063102338	1.62242289295728	15.5463873450192	22	69	anterior/posterior pattern specification	14	blue
GO:0009790	0.0466888425236404	1.27213990310765	66.6917486105173	79	296	embryo development	14	blue
GO:0045944	0.0469898707720113	1.78656224749829	10.5895681915348	16	47	positive regulation of transcription from RNA polymerase II promoter	14	blue
GO:0051171	0.0476408930838502	1.22340615512828	97.5592133390338	112	433	regulation of nitrogen compound metabolic process	14	blue
GO:0006401	0.0482351929359722	2.68545049347342	3.60495938435229	7	16	RNA catabolic process	14	blue
GO:0008284	0.0488936791918567	1.86286982248521	9.01239846088072	14	40	positive regulation of cell proliferation	14	blue
GO:0009913	0.048994617718773	2.15996168582375	5.85805899957247	10	26	epidermal cell differentiation	14	blue
GO:0003002	0.0496361097865447	1.36285998013903	37.626763574177	47	167	regionalization	14	blue
GO:0006891	0.0498601395491588	4.59809523809524	1.57716973065413	4	7	intra-Golgi vesicle-mediated transport	14	blue
GO:0031050	0.0498601395491588	4.59809523809524	1.57716973065413	4	7	dsRNA fragmentation	14	blue
GO:0043331	0.0498601395491588	4.59809523809524	1.57716973065413	4	7	response to dsRNA	14	blue
GO:0007428	0.0498601395491588	4.59809523809524	1.57716973065413	4	7	primary branching, open tracheal system	14	blue
GO:0060021	0.0498601395491588	4.59809523809524	1.57716973065413	4	7	palate development	14	blue
GO:0071359	0.0498601395491588	4.59809523809524	1.57716973065413	4	7	cellular response to dsRNA	14	blue
GO:0070918	0.0498601395491588	4.59809523809524	1.57716973065413	4	7	production of small RNA involved in gene silencing by RNA	14	blue
