# Supplementary figures and images for: Genes associated with ant social behavior show distinct transcriptional and evolutionary patterns
Source: eLife journal article supplement (doi:10.7554/elife.04775), 2015-01-26

Age of marked workers vs. behavior they were observed performing.

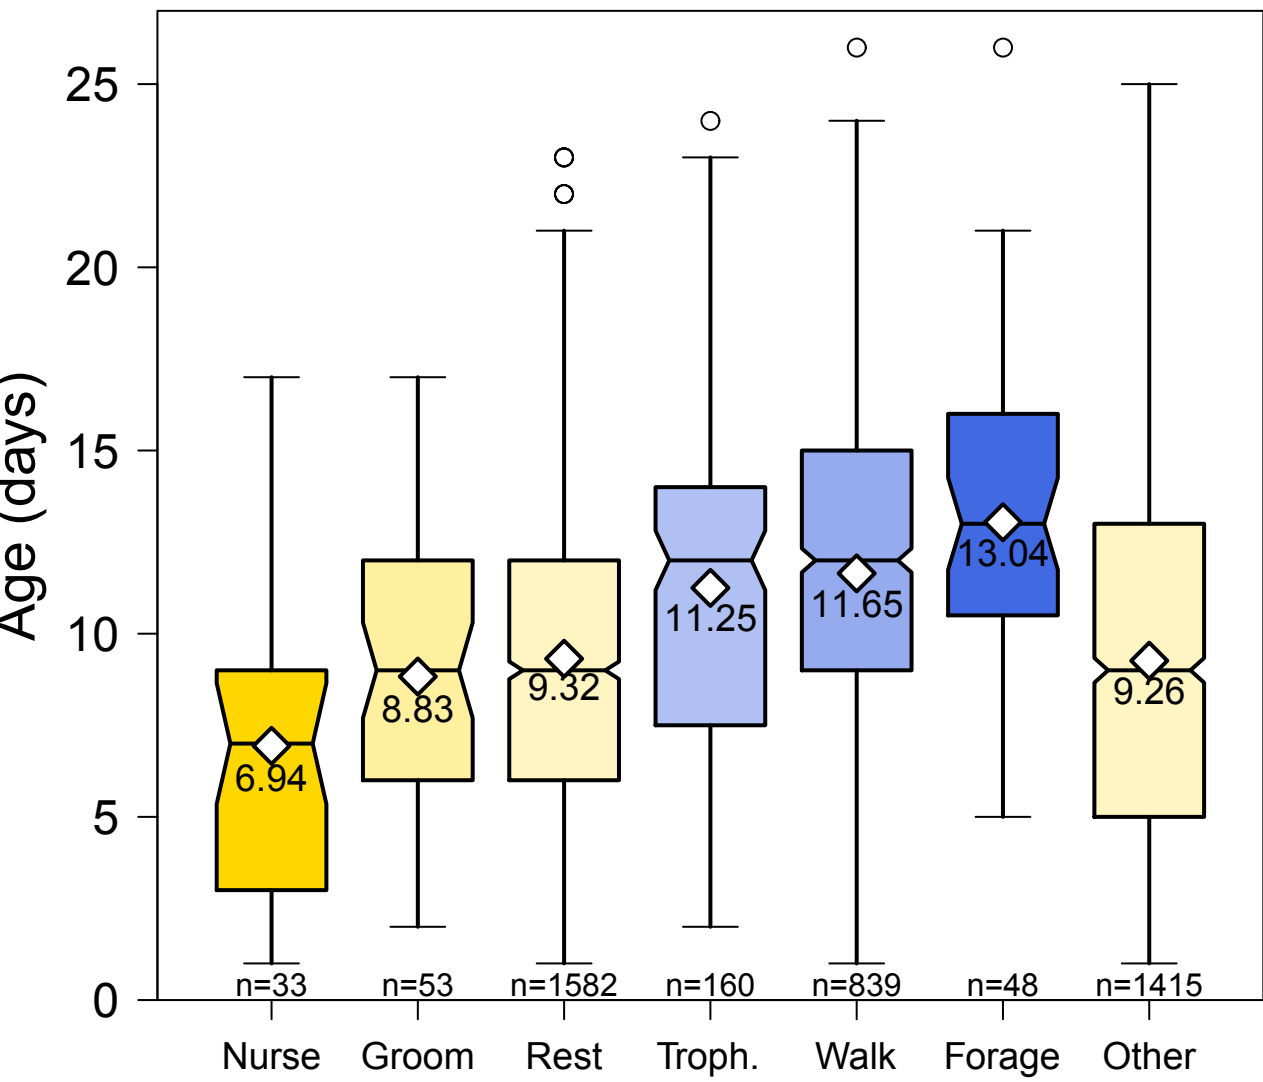

Supplement: supp [file elife-04775-supp-v1.zip › elife_poa_e04775_Figure_1_figure_supplement_1.pdf]

Age of marked workers vs. nest location where they were observed.

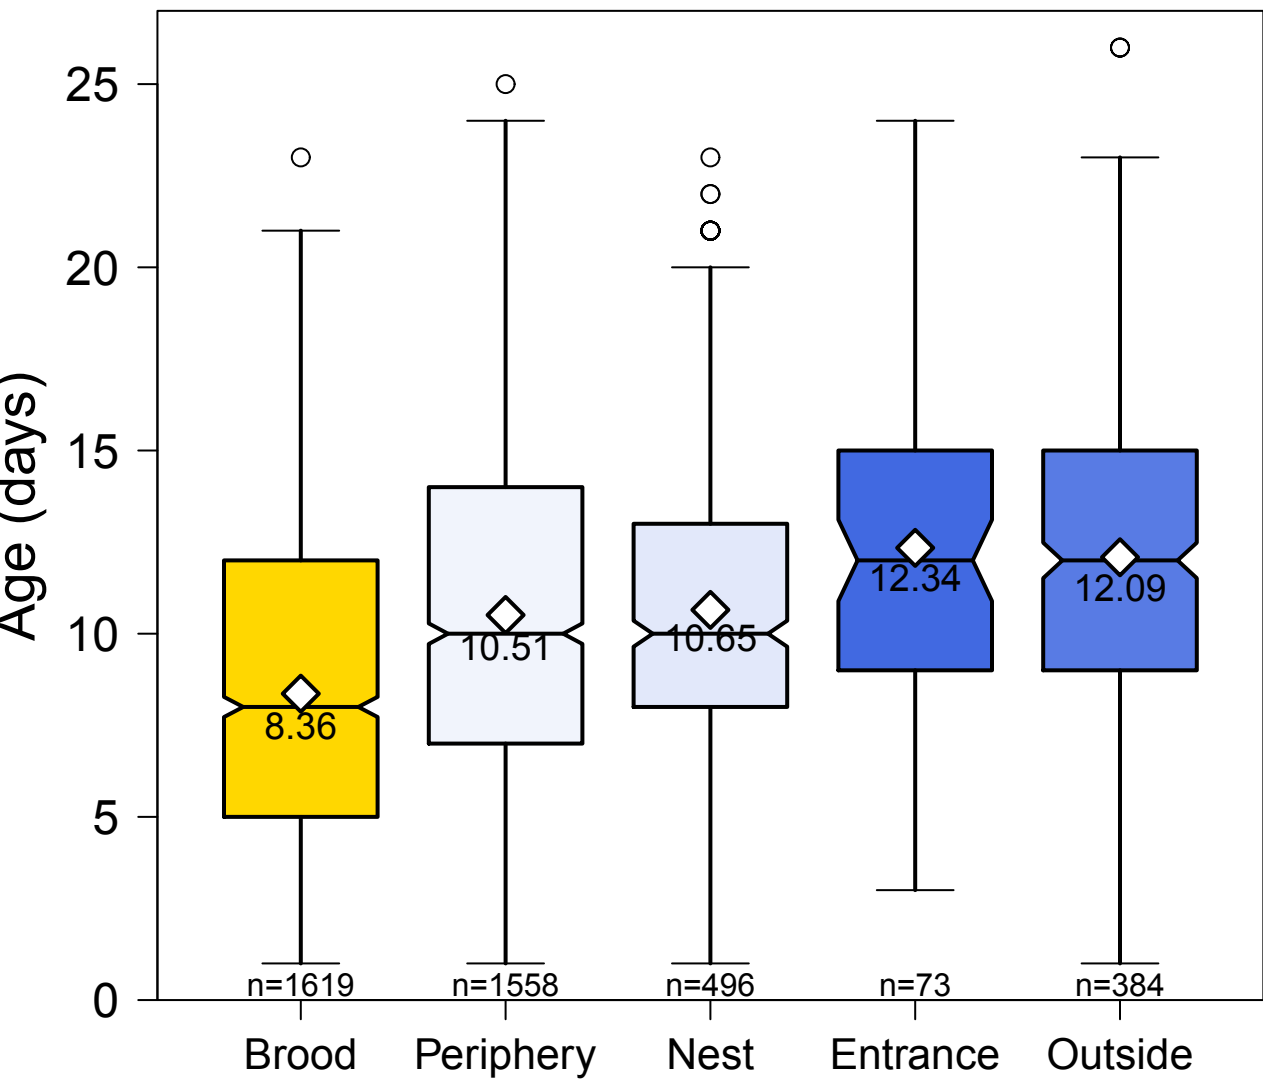

Supplement: supp [file elife-04775-supp-v1.zip › elife_poa_e04775_Figure_1_figure_supplement_2.pdf]

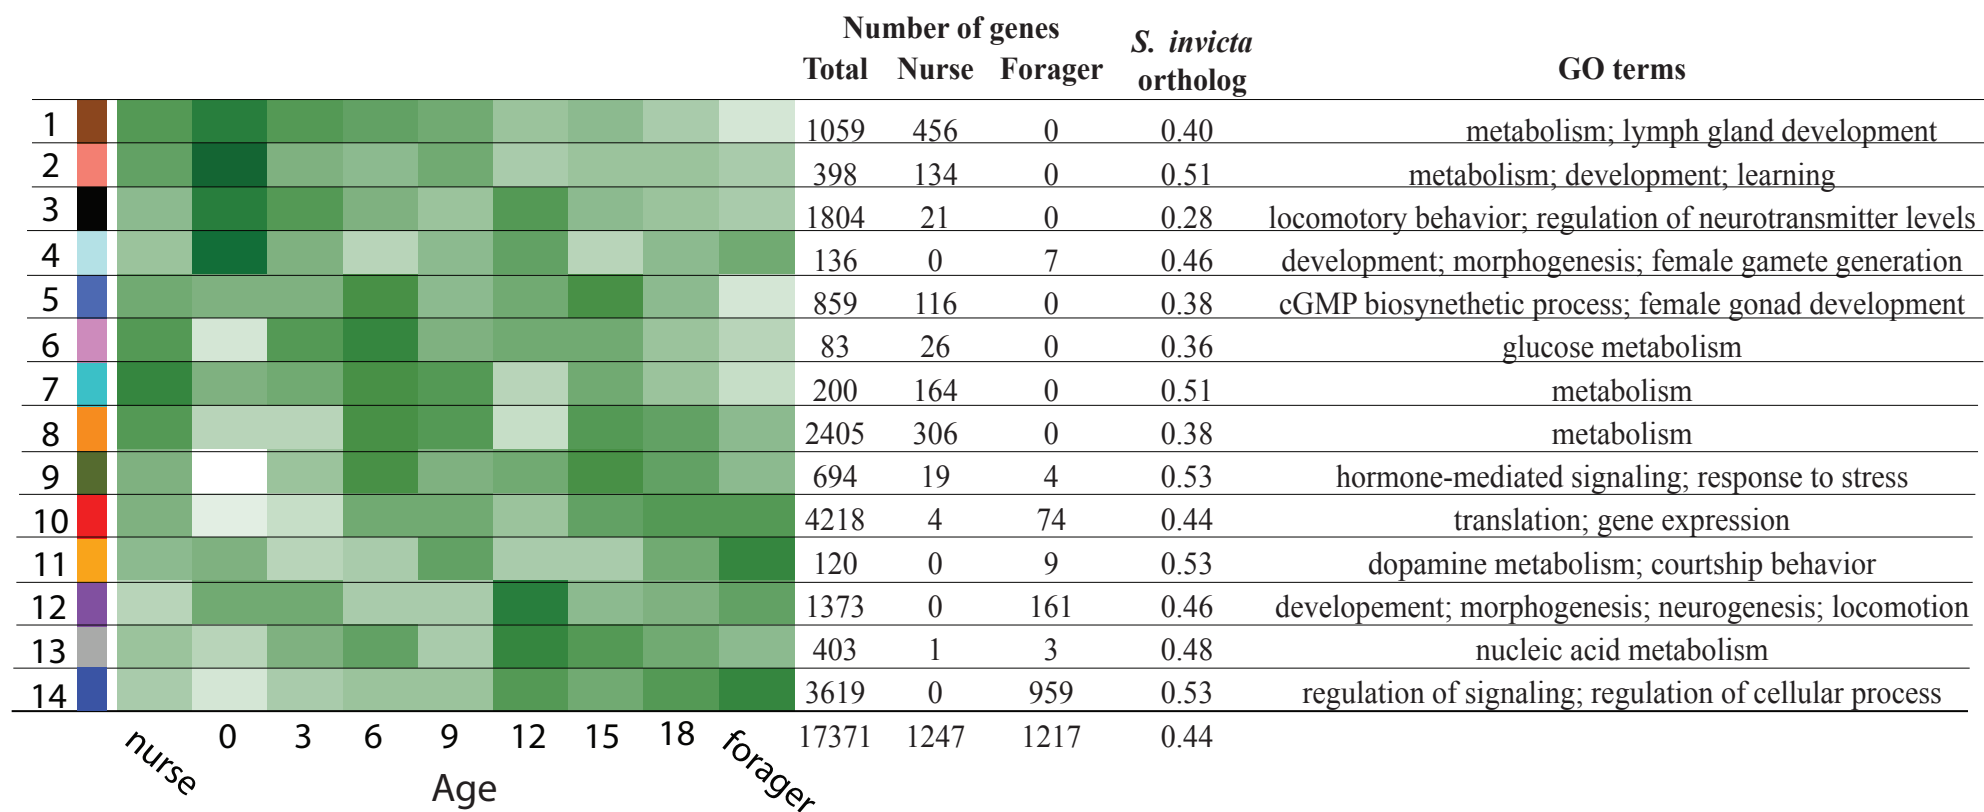

Supplement: supp [file elife-04775-supp-v1.zip › elife_poa_e04775_Figure_1_figure_supplement_3.pdf]

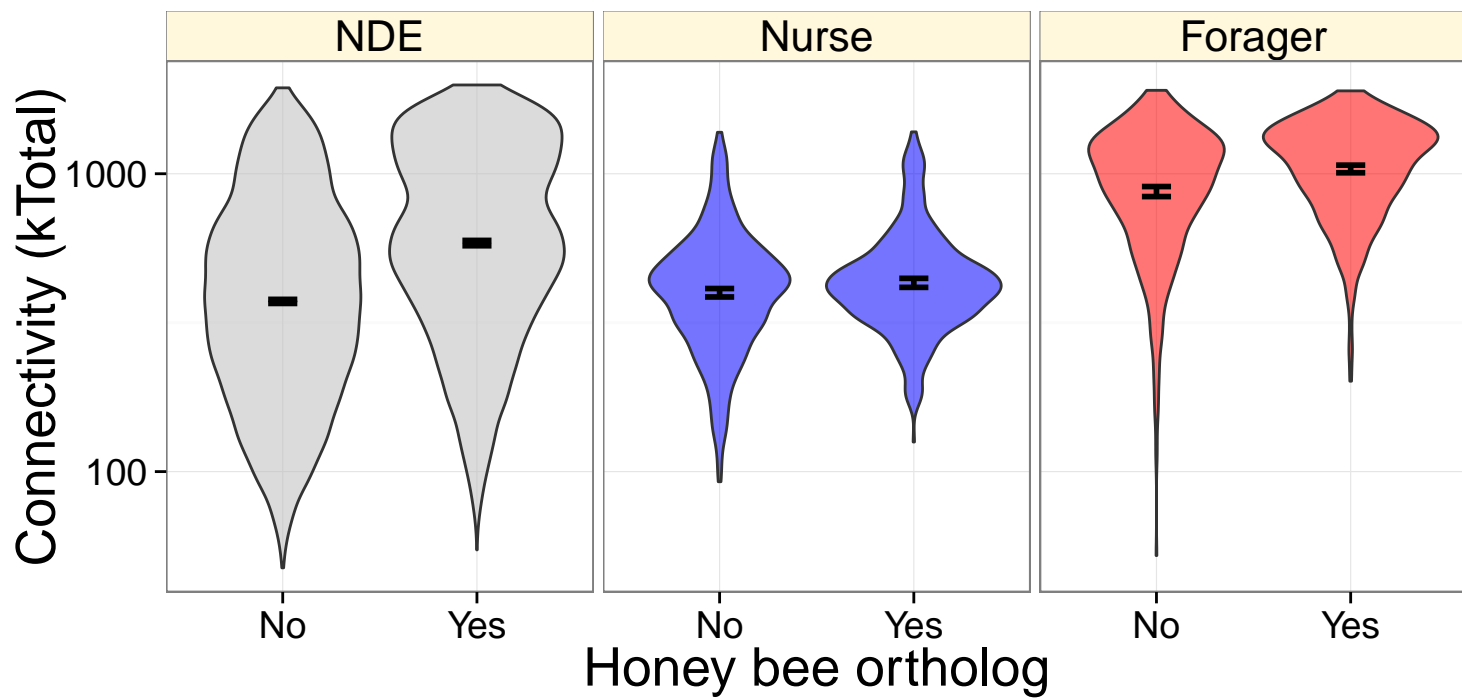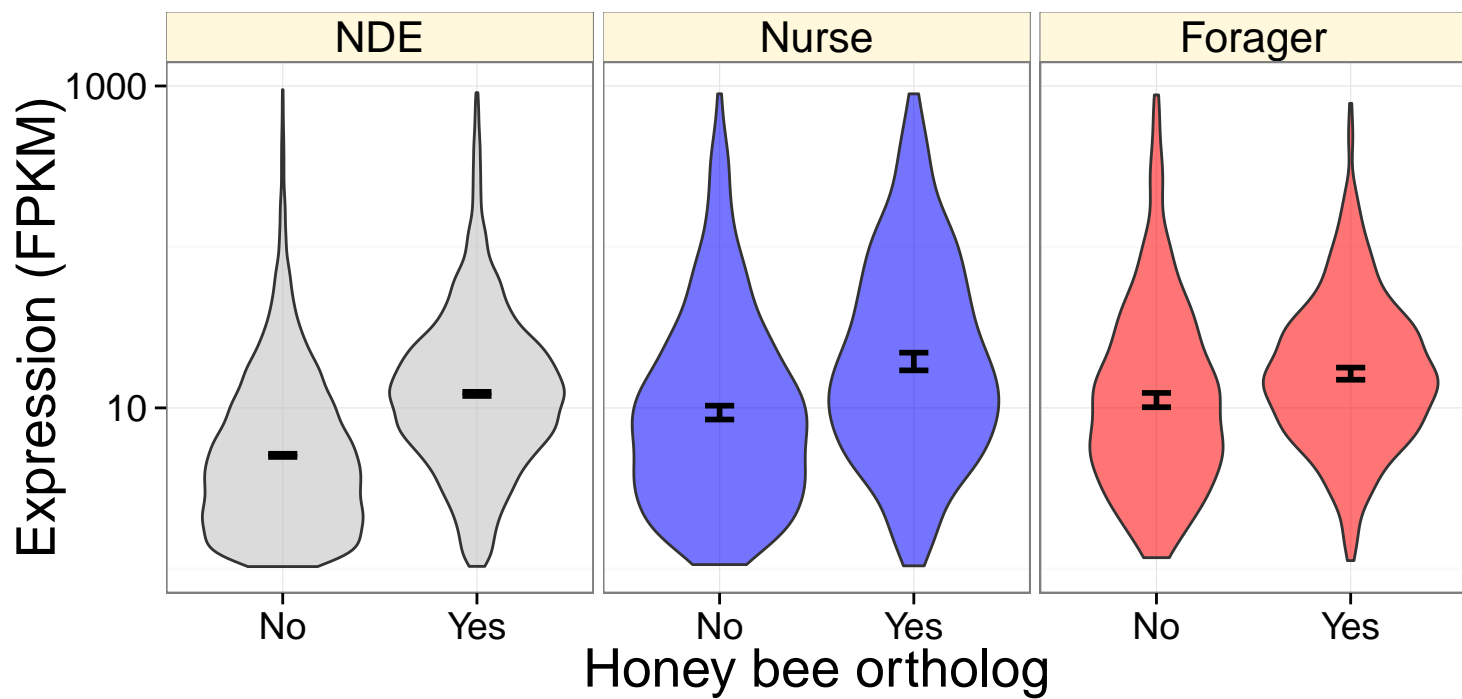

Supplement: supp [file elife-04775-supp-v1.zip › elife_poa_e04775_Figure_3_figure_supplement_1.pdf]
